# Supplementary material
Source: PubMed Central journal article supplement (PMC7554145)

# Supporting Information

for

## *DPAGT1 Inhibitors of Capuramycin Analogues and Their Antimigratory Activities of Solid Tumors*

Katsuhiko Mitachi,<sup>a</sup> Rita G. Kansal,<sup>b</sup> Kirk E. Hevener,<sup>a</sup> Cody D. Gillman,<sup>c</sup> Syed M. Hussain,<sup>b</sup> Hyun Gi Yun,<sup>c</sup> Gustavo A. Miranda-Carboni,<sup>d</sup> Evan S. Glazer,<sup>b</sup> William M. Clemons Jr.,<sup>c</sup> and Michio Kurosu\*<sup>a</sup>

<sup>a</sup> Department of Pharmaceutical Sciences, College of Pharmacy, University of Tennessee Health Science Center, 881 Madison Av, Memphis, TN 38163, USA

<sup>b</sup> Department of Surgery and Center for Cancer Research, College of Pharmacy, University of Tennessee Health Science Center, 910 Madison St, Suite 300, Memphis, TN 38163, USA

<sup>c</sup> Division of Chemistry and Chemical Engineering, California Institute of Technology, 1200 E. California Bld. Pasadena, CA 91125, USA

<sup>d</sup> Department of Medicine, Division of Hematology-Oncology, University of Tennessee Health Science Center, 19 S. Manassas Av, Memphis, TN 38163, USA

[mkurosu@uthsc.edu](mailto:mkurosu@uthsc.edu)

### Table of Contents

|                                                               |          |
|---------------------------------------------------------------|----------|
| General .....                                                 | S2       |
| Experimental .....                                            | S3-S41   |
| References .....                                              | S42      |
| Copies of <sup>1</sup> H and <sup>13</sup> C NMR spectra..... | S43-S144 |

## General

All chemicals were purchased from commercial sources and used without further purification unless otherwise noted. THF, CH<sub>2</sub>Cl<sub>2</sub>, and DMF were purified via Innovative Technology's Pure-Solve System. All reactions were performed under an Argon atmosphere. All stirring was performed with an internal magnetic stirrer. Reactions were monitored by TLC using 0.25 mm coated commercial silica gel plates (EMD, Silica Gel 60F<sub>254</sub>). TLC spots were visualized by UV light at 254 nm, or developed with ceric ammonium molybdate or anisaldehyde or copper sulfate or ninhydrin solutions by heating on a hot plate. Reactions were also monitored by using SHIMADZU LCMS-2020 with solvents: A: 0.1% formic acid in water, B: acetonitrile. Flash chromatography was performed with SiliCycle silica gel (Purasil 60 Å, 230-400 Mesh). Proton magnetic resonance (<sup>1</sup>H-NMR) spectral data were recorded on 400, and 500 MHz instruments. Carbon magnetic resonance (<sup>13</sup>C-NMR) spectral data were recorded on 100 and 125 MHz instruments. For all NMR spectra, chemical shifts (δH, δC) were quoted in parts per million (ppm), and *J* values were quoted in Hz. <sup>1</sup>H and <sup>13</sup>C NMR spectra were calibrated with residual undeuterated solvent (CDCl<sub>3</sub>: δH = 7.26 ppm, δC = 77.16 ppm; CD<sub>3</sub>CN: δH = 1.94 ppm, δC = 1.32 ppm; CD<sub>3</sub>OD: δH = 3.31 ppm, δC = 49.00 ppm; DMSO-*d*<sub>6</sub>: δH = 2.50 ppm, δC = 39.52 ppm; D<sub>2</sub>O: δH = 4.79 ppm) as an internal reference. The following abbreviations were used to designate the multiplicities: s = singlet, d = doublet, dd = double doublets, t = triplet, q = quartet, quin = quintet, hept = heptet, m = multiplet, br = broad. Infrared (IR) spectra were recorded on a Perkin-Elmer FT1600 spectrometer. HPLC analyses were performed with a Shimadzu LC-20AD HPLC system. HR-MS data were obtained from a Waters Synapt G2-Si (ion mobility mass spectrometer with nanoelectrospray ionization).

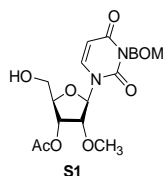

S1

**(2R,5R)-5-(3-((Benzyloxy)methyl)-2,4-dioxo-3,4-dihydropyrimidin-1(2H)-yl)-2-(hydroxymethyl)-4-methoxytetrahydrofuran-3-yl acetate (S1).** The title compound was synthesized according to the reported procedure<sup>1</sup>: <sup>1</sup>H NMR (400 MHz, Chloroform-*d*)  $\delta$  7.71 (d, *J* = 8.2 Hz, 1H), 7.40 – 7.26 (m, 5H), 5.77 (d, *J* = 6.4 Hz, 1H), 5.75 (d, *J* = 2.6 Hz, 1H), 5.48 (d, *J* = 2.2 Hz, 2H), 5.23 (t, *J* = 5.2 Hz, 1H), 4.71 (s, 2H), 4.23 – 4.17 (m, 2H), 3.99 (dd, *J* = 12.6, 2.0 Hz, 1H), 3.78 (dd, *J* = 12.6, 2.1 Hz, 1H), 3.48 (s, 3H), 2.17 (s, 3H); <sup>13</sup>C NMR (101 MHz, CDCl<sub>3</sub>)  $\delta$  170.59, 162.49, 151.01, 139.77, 137.77, 128.31 (2C), 127.70, 127.67 (2C), 102.21, 90.31, 82.65, 81.20, 72.31, 70.27, 70.01, 61.24, 58.95, 20.81; HRMS (ESI+) *m/z* calcd for C<sub>20</sub>H<sub>25</sub>N<sub>2</sub>O<sub>8</sub> [M + H] 421.1611, found: 421.1641.

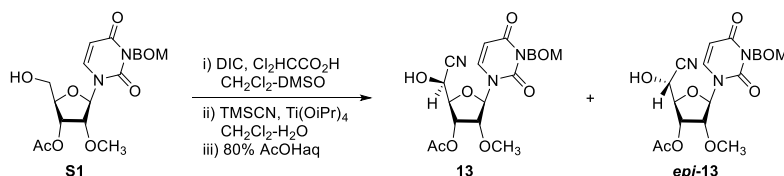

**(2R,5R)-5-(3-((Benzyloxy)methyl)-2,4-dioxo-3,4-dihydropyrimidin-1(2H)-yl)-2-((S)-cyano(hydroxy)methyl)-4-methoxytetrahydrofuran-3-yl acetate (13).** To a stirred solution of S1 (1.72 g, 4.09 mmol) and dichloroacetic acid (0.51 mL, 6.14 mmol) in a 10:1 mixture of CH<sub>2</sub>Cl<sub>2</sub> and DMSO (18.4 mL) was added DIC (1.28 mL, 8.18 mmol) at 0 °C. After being stirred for 2h, H<sub>2</sub>O (0.16 mL), TMSCN (1.02 mL, 8.18 mmol) and Ti(O<sup>*i*</sup>Pr)<sub>4</sub> (2.42 mL, 8.18 mmol) were added to the reaction solution. After being stirred for 8h at r.t., the solution was concentrated *in vacuo*. The crude mixture was suspended to a 4:1 mixture of AcOH and H<sub>2</sub>O (50 mL). After being stirred for 13h at r.t., the solution was concentrated *in vacuo*. The residue was quenched with aq. NaHCO<sub>3</sub>, extracted with EtOAc. The combined organic extracts were dried over Na<sub>2</sub>SO<sub>4</sub> and concentrated *in vacuo*. The crude mixture was purified by silica gel column chromatography (hexanes/EtOAc = 2/1 - 1/2) to afford 0.70 g (38%) of **13** and 0.66 g (36%) of **epi-13**. Data for **13**: <sup>1</sup>H NMR (400 MHz, Chloroform-*d*)  $\delta$  7.39 – 7.27 (m, 5H), 7.21 (d, *J* = 8.1 Hz, 1H), 5.82 (d, *J* = 8.1 Hz, 1H), 5.49 (s, 2H), 5.38 (d, *J* = 6.9 Hz, 1H), 5.35 (dd, *J* = 5.7, 2.4 Hz, 1H), 4.71 (s, 2H), 4.71 – 4.69 (m, 1H), 4.54 (dd, *J* = 6.9, 5.7 Hz, 1H), 4.36 (t, *J* = 2.2 Hz, 1H), 3.39 (s, 3H), 2.19 (s, 3H); <sup>13</sup>C NMR (101 MHz, CDCl<sub>3</sub>)  $\delta$  170.20, 161.85, 151.38, 141.95, 137.51, 128.42 (2C), 127.84, 127.66 (2C), 117.13, 103.23, 95.16, 84.08, 78.39, 72.52, 70.47, 70.31, 61.79, 59.23, 20.71; HRMS (ESI+) *m/z* calcd for C<sub>21</sub>H<sub>24</sub>N<sub>3</sub>O<sub>8</sub> [M + H] 446.1563, found: 446.1568. Data for **(2R,5R)-5-(3-((Benzyloxy)methyl)-2,4-dioxo-3,4-dihydropyrimidin-1(2H)-yl)-2-((R)-cyano(hydroxy)methyl)-4-methoxytetrahydrofuran-3-yl acetate (epi-13)**: <sup>1</sup>H NMR (400 MHz, Chloroform-*d*)  $\delta$  7.53 (d, *J* = 8.1 Hz, 1H), 7.38 – 7.27 (m, 5H), 5.80 (d, *J* = 5.5 Hz, 1H), 5.78 (d, *J* = 8.2 Hz, 1H), 5.50 – 5.43 (m, 3H), 4.82 (d, *J* = 2.6 Hz, 1H), 4.70 (s, 2H), 4.37 (dd, *J* = 4.0, 2.6 Hz, 1H), 4.19 (t, *J* = 5.4 Hz, 1H), 3.44 (s, 3H), 2.19 (s, 3H); <sup>13</sup>C NMR (101 MHz, CDCl<sub>3</sub>)  $\delta$  170.02, 162.37, 151.07, 139.71, 137.50, 128.38 (2C),

127.85, 127.70 (2C), 116.60, 102.71, 90.45, 82.72, 80.66, 72.43, 70.43, 69.12, 60.90, 59.37, 20.73; HRMS (ESI+)  $m/z$  calcd for  $C_{21}H_{24}N_3O_8$  [M + H] 446.1563, found: 446.1580.

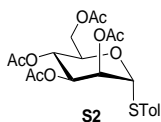

**(2R,3R,4S,5S,6R)-2-(Acetoxymethyl)-6-(*p*-tolylthio)tetrahydro-2H-pyran-3,4,5-triyl triacetate (S2).** The title compound was synthesized according to the reported procedure<sup>1</sup>: <sup>1</sup>H NMR (400 MHz, Chloroform-*d*)  $\delta$  7.37 (d,  $J$  = 8.2 Hz, 2H), 7.12 (d,  $J$  = 7.9 Hz, 2H), 5.50 – 5.48 (m, 1H), 5.41 (d,  $J$  = 1.5 Hz, 1H), 5.32 (dd,  $J$  = 5.6, 1.7 Hz, 2H), 4.56 (dp,  $J$  = 8.1, 2.5 Hz, 1H), 4.30 (dd,  $J$  = 12.2, 5.9 Hz, 1H), 4.10 (dd,  $J$  = 12.2, 2.4 Hz, 1H), 2.33 (s, 3H), 2.14 (s, 3H), 2.07 (s, 3H), 2.06 (s, 3H), 2.01 (s, 3H); <sup>13</sup>C NMR (101 MHz, CDCl<sub>3</sub>)  $\delta$  170.56, 169.92, 169.81, 169.74, 138.44, 132.58 (2C), 129.93 (2C), 128.72, 85.99, 70.82, 69.34, 69.32, 66.34, 62.46, 21.13, 20.89, 20.72, 20.70, 20.65; HRMS (ESI+)  $m/z$  calcd for  $C_{21}H_{27}O_9S$  [M + H] 455.1376, found: 455.1395.

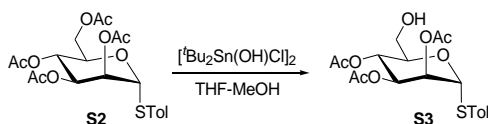

**(2R,3R,4S,5S,6R)-2-(Hydroxymethyl)-6-(*p*-tolylthio)tetrahydro-2H-pyran-3,4,5-triyl triacetate (S3).** To a stirred solution of **S2** (11.1 g, 24.3 mmol) in a 1:4 mixture of THF and MeOH (25 mL) was added [*t*-Bu<sub>2</sub>Sn(OH)Cl]<sub>2</sub> (1.39 g, 2.43 mmol). After being stirred for 24h at r.t., the solution was concentrated *in vacuo*. The crude mixture was purified by silica gel column chromatography (hexanes/EtOAc = 2/1 - 1/1) to afford 8.01 g (80%) of **S3**: <sup>1</sup>H NMR (400 MHz, Chloroform-*d*)  $\delta$  7.36 (d,  $J$  = 8.1 Hz, 2H), 7.12 (d,  $J$  = 8.0 Hz, 2H), 5.51 (dd,  $J$  = 3.3, 1.6 Hz, 1H), 5.42 (d,  $J$  = 1.5 Hz, 1H), 5.38 (dd,  $J$  = 10.1, 3.3 Hz, 1H), 5.29 (t,  $J$  = 10.0 Hz, 1H), 4.30 (ddd,  $J$  = 9.7, 4.2, 2.3 Hz, 1H), 3.69 (dd,  $J$  = 12.7, 2.5 Hz, 1H), 3.63 (dd,  $J$  = 12.8, 4.2 Hz, 1H), 2.32 (s, 3H), 2.13 (s, 3H), 2.10 (s, 3H), 2.02 (s, 3H); <sup>13</sup>C NMR (101 MHz, CDCl<sub>3</sub>)  $\delta$  170.78, 169.96, 169.81, 138.43, 132.58 (2C), 129.99 (2C), 128.73, 86.04, 71.62, 70.88, 69.10, 66.51, 61.20, 21.11, 20.87, 20.75, 20.66; HRMS (ESI+)  $m/z$  calcd for  $C_{19}H_{25}O_8S$  [M + H] 413.1270, found: 413.1277.

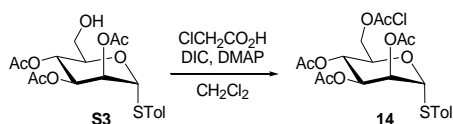

**(2R,3R,4S,5S,6R)-2-((2-Chloroacetoxy)methyl)-6-(*p*-tolylthio)tetrahydro-2H-pyran-3,4,5-triyl triacetate (14).** To a stirred solution of **S3** (8.01 g, 19.4 mmol), chloroacetic acid (2.75 g, 29.1 mmol) and DMAP (0.24 g, 1.94 mmol) in CH<sub>2</sub>Cl<sub>2</sub> (50 mL) was added

DIC (4.56 mL, 29.1 mmol). After being stirred for 4h at r.t., the reaction mixture was concentrated *in vacuo*. The crude mixture was purified by silica gel column chromatography (hexanes/EtOAc = 3/1 - 2/1) to afford 8.92 g (94%) of **14**: <sup>1</sup>H NMR (400 MHz, Chloroform-*d*) δ 7.36 (d, *J* = 8.1 Hz, 2H), 7.13 (d, *J* = 8.0 Hz, 2H), 5.49 (d, *J* = 2.2 Hz, 1H), 5.42 (d, *J* = 1.6 Hz, 1H), 5.32 (d, *J* = 6.4 Hz, 2H), 4.59 – 4.54 (m, 1H), 4.40 (dd, *J* = 12.2, 5.9 Hz, 1H), 4.21 (dd, *J* = 12.1, 2.2 Hz, 1H), 4.03 (d, *J* = 1.1 Hz, 2H), 2.33 (s, 3H), 2.14 (s, 3H), 2.08 (s, 3H), 2.02 (s, 3H); <sup>13</sup>C NMR (101 MHz, CDCl<sub>3</sub>) δ 169.88, 169.81, 169.78, 166.93, 138.51, 132.48 (2C), 129.98 (2C), 128.56, 85.84, 70.70, 69.19, 69.17, 66.19, 63.95, 40.58, 21.13, 20.87, 20.71, 20.64; HRMS (ESI+) *m/z* calcd for C<sub>21</sub>H<sub>26</sub>ClO<sub>9</sub>S [M + H] 489.0986, found: 489.1003.

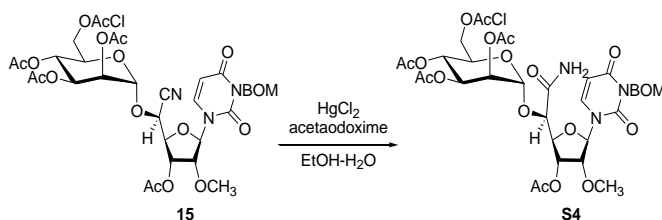

**(2R,3S,4S,5R,6R)-2-((1R)-1-((2S,5R)-3-Acetoxy-5-(3-((benzyloxy)methyl)-2,4-dioxo-3,4-dihydropyrimidin-1(2H)-yl)-4-methoxytetrahydrofuran-2-yl)-2-amino-2-oxoethoxy)-6-((2-chloroacetoxy)methyl)tetrahydro-2H-pyran-3,4,5-triyl triacetate (S4)**. To a stirred solution of **15** (0.24 g, 0.29 mmol) in a 9:1 mixture of EtOH and H<sub>2</sub>O (2.9 mL) were added HgCl<sub>2</sub> (0.16 g, 0.59 mmol) and acetaaldoxime (0.18 mL, 2.9 mmol). After being stirred for 13h at r.t., the reaction mixture was concentrated *in vacuo*. The residue was quenched with aq. NaHCO<sub>3</sub>, extracted with CHCl<sub>3</sub>. The combined organic extracts were dried over Na<sub>2</sub>SO<sub>4</sub> and concentrated *in vacuo*. The crude product was purified by silica gel column chromatography (hexanes/EtOAc = 1/2 - CHCl<sub>3</sub>/MeOH = 96/4) to afford **S4** (0.21 g, 87%): <sup>1</sup>H NMR (400 MHz, Chloroform-*d*) δ 7.53 (d, *J* = 8.2 Hz, 1H), 7.39 – 7.30 (m, 5H), 6.36 (brs, 1H), 6.06 (d, *J* = 8.0 Hz, 1H), 5.97 (d, *J* = 4.1 Hz, 1H), 5.76 (brs, 1H), 5.53 – 5.44 (m, 2H), 5.40 – 5.27 (m, 2H), 5.19 (dd, *J* = 10.0, 3.3 Hz, 1H), 5.11 (t, *J* = 5.8 Hz, 1H), 4.99 (d, *J* = 2.0 Hz, 1H), 4.70 (s, 2H), 4.68 (d, *J* = 6.5 Hz, 1H), 4.53 (dd, *J* = 6.1, 2.2 Hz, 1H), 4.42 (d, *J* = 2.2 Hz, 1H), 4.37 (dd, *J* = 12.4, 5.3 Hz, 1H), 4.21 (dd, *J* = 12.3, 2.4 Hz, 1H), 4.15 (d, *J* = 2.4 Hz, 2H), 4.01 (dd, *J* = 5.6, 4.2 Hz, 1H), 3.46 (s, 3H), 2.18 (s, 3H), 2.17 (s, 3H), 2.07 (s, 3H), 2.04 (s, 3H); <sup>13</sup>C NMR (101 MHz, CDCl<sub>3</sub>) δ 170.22, 170.18, 170.04, 169.67, 169.53, 167.06, 162.40, 150.91, 137.75, 137.58, 128.34, 128.32 (2C), 127.70 (2C), 103.35, 97.10, 88.44, 80.95, 76.39, 72.25, 70.51, 70.33, 69.76, 68.72, 68.68, 64.98, 63.43, 59.03, 40.65, 20.76, 20.67, 20.63 (2C); HRMS (ESI+) *m/z* calcd for C<sub>35</sub>H<sub>43</sub>ClN<sub>3</sub>O<sub>18</sub> [M + H] 828.2230, found: 828.2246.

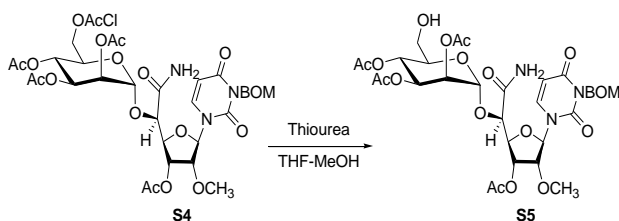

**(2R,3S,4S,5R,6R)-2-((1R)-1-((2S,5R)-3-Acetoxy-5-(3-((benzyloxy)methyl)-2,4-dioxo-3,4-dihydropyrimidin-1(2H)-yl)-4-methoxytetrahydrofuran-2-yl)-2-amino-2-oxoethoxy)-6-(hydroxymethyl)tetrahydro-2H-pyran-3,4,5-triyl triacetate (S5).** To a solution of **S4** (0.21 g, 0.26 mmol) in a 1:1 mixture of THF and MeOH (2.6 mL) was added thiourea (0.059 g, 0.77 mmol). After being stirred for 11h at 50 °C, the reaction mixture was concentrated *in vacuo*. The residue was quenched with H<sub>2</sub>O, extracted with CHCl<sub>3</sub>. The combined organic extracts were dried over Na<sub>2</sub>SO<sub>4</sub> and concentrated *in vacuo*. The crude product was purified by silica gel column chromatography (CHCl<sub>3</sub>/MeOH = 98/2 - 97/3 - 96/4) to afford **S5** (0.15 g, 75%): <sup>1</sup>H NMR (400 MHz, Chloroform-*d*) δ 7.59 (d, *J* = 8.2 Hz, 1H), 7.40 – 7.28 (m, 5H), 6.46 (brs, 1H), 6.10 (d, *J* = 8.2 Hz, 1H), 5.93 (d, *J* = 2.7 Hz, 1H), 5.88 (brs, 1H), 5.50 (d, *J* = 9.8 Hz, 1H), 5.46 (d, *J* = 9.5 Hz, 1H), 5.41 (dd, *J* = 3.3, 1.8 Hz, 1H), 5.28 – 5.22 (m, 1H), 5.17 (dd, *J* = 10.1, 3.3 Hz, 1H), 5.01 (dd, *J* = 7.8, 5.5 Hz, 1H), 4.99 (d, *J* = 1.9 Hz, 1H), 4.70 (s, 2H), 4.58 (dd, *J* = 7.9, 2.2 Hz, 1H), 4.43 (d, *J* = 2.2 Hz, 1H), 4.03 (dd, *J* = 5.3, 2.6 Hz, 1H), 3.70 (ddd, *J* = 9.5, 4.7, 2.9 Hz, 1H), 3.60 (dd, *J* = 5.8, 3.9 Hz, 1H), 3.49 (s, 3H), 3.38 (d, *J* = 14.3 Hz, 1H), 2.16 (s, 3H), 2.15 (s, 3H), 2.09 (s, 3H), 2.04 (s, 3H); <sup>13</sup>C NMR (101 MHz, CDCl<sub>3</sub>) δ 170.42, 170.38, 170.18, 170.04, 162.54, 150.77, 137.75, 137.36, 128.32 (2C), 127.73 (2C), 127.70, 103.06, 97.25, 88.88, 81.14, 80.39, 75.76, 72.92, 72.26, 70.25, 69.52, 68.83, 68.75, 65.42, 61.25, 58.98, 20.78, 20.74, 20.66, 20.59; HRMS (ESI+) *m/z*. calcd for C<sub>33</sub>H<sub>42</sub>N<sub>3</sub>O<sub>17</sub> [M + H] 752.2514, found: 752.2522.

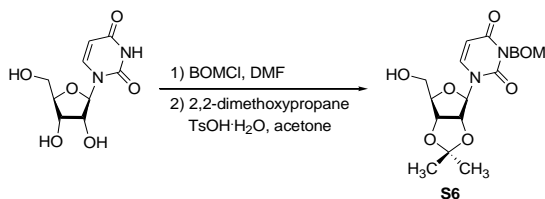

**3-((Benzyloxy)methyl)-1-((3aR,4R,6R,6aR)-6-(hydroxymethyl)-2,2-dimethyltetrahydrofuro[3,4-*d*][1,3]dioxol-4-yl)pyrimidine-2,4(1H,3H)-dione (S6).** To a stirred solution of uridine (14.7g, 60 mmol) in DMF (50 mL) were added BOMCl (6.87 mL, 50 mmol) and DBU (11.2 mL, 75 mmol). After being stirred for 6h at 0 °C, the reaction was quenched with 1M aq. HCl, extracted with CHCl<sub>3</sub>. The combined organic extracts were dried over Na<sub>2</sub>SO<sub>4</sub> and concentrated *in vacuo*. To a stirred solution of the crude mixture and 2,2-dimethoxypropane (18.4 mL, 150 mmol) in acetone (50 mL) was added TsOH·H<sub>2</sub>O (0.95 g, 5.0 mmol). After being stirred for 8h at r.t., the solution was concentrated *in vacuo*. The residue was quenched with aq. NaHCO<sub>3</sub>, extracted with EtOAc. The combined organic extracts were dried over Na<sub>2</sub>SO<sub>4</sub> and concentrated *in vacuo*. The crude mixture was purified by silica gel column chromatography (hexanes/EtOAc = 1/2)

to afford 15.8 g (78% for 2 steps) of **S6**:  $^1\text{H}$  NMR (400 MHz, Chloroform-*d*)  $\delta$  7.37 – 7.26 (m, 6H), 5.73 (d,  $J = 8.1$  Hz, 1H), 5.56 (d,  $J = 2.6$  Hz, 1H), 5.48 (d,  $J = 9.7$  Hz, 1H), 5.44 (d,  $J = 9.7$  Hz, 1H), 4.97 (dd,  $J = 6.4, 2.7$  Hz, 1H), 4.94 (dd,  $J = 9.5, 3.1$  Hz, 1H), 4.69 (s, 2H), 4.29 (q,  $J = 3.0$  Hz, 1H), 3.91 (dd,  $J = 12.0, 2.5$  Hz, 1H), 3.79 (dd,  $J = 12.0, 3.5$  Hz, 1H), 1.57 (s, 3H), 1.36 (s, 3H);  $^{13}\text{C}$  NMR (101 MHz,  $\text{CDCl}_3$ )  $\delta$  162.50, 151.00, 141.27, 137.70, 128.30 (2C), 127.70, 127.59 (2C), 114.25, 102.01, 96.49, 86.93, 83.83, 80.23, 72.36, 70.32, 62.63, 27.21, 25.22; HRMS (ESI+)  $m/z$  calcd for  $\text{C}_{20}\text{H}_{25}\text{N}_2\text{O}_7$  [ $\text{M} + \text{H}$ ] 405.1662, found: 405.1681.

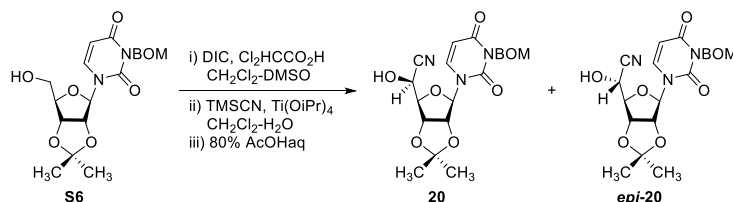

**(S)-2-((3*aR*,4*R*,6*R*,6*aR*)-6-(3-((Benzyloxy)methyl)-2,4-dioxo-3,4-dihydropyrimidin-1(2*H*)-yl)-2,2-dimethyltetrahydrofuro[3,4-*d*][1,3]dioxol-4-yl)-2-hydroxyacetonitrile (20).** To a stirred solution of **S6** (2.89 g, 7.15 mmol) and dichloroacetic acid (0.88 mL, 10.7 mmol) in a 10:1 mixture of  $\text{CH}_2\text{Cl}_2$  and DMSO (31.5 mL) was added DIC (2.24 mL, 14.3 mmol) at 0 °C. After being stirred for 2h,  $\text{H}_2\text{O}$  (0.29 mL), TMSCN (1.35 mL, 14.3 mmol) and  $\text{Ti}(\text{O}^i\text{Pr})_4$  (4.23 mL, 14.3 mmol) were added to the reaction solution. After being stirred for 6h at r.t., the solution was concentrated *in vacuo*. The crude mixture was suspended to a 4:1 mixture of AcOH and  $\text{H}_2\text{O}$  (50 mL). After being stirred for 9h at r.t., the solution was concentrated *in vacuo*. The residue was quenched with aq.  $\text{NaHCO}_3$ , extracted with EtOAc. The combined organic extracts were dried over  $\text{Na}_2\text{SO}_4$  and concentrated *in vacuo*. The crude mixture was purified by silica gel column chromatography (hexanes/EtOAc = 2/1 - 1/1) to afford 1.18 g (38%) of **20** and 1.03 g (34%) of *epi-20*. Data for **20**:  $^1\text{H}$  NMR (400 MHz, Chloroform-*d*)  $\delta$  7.36 – 7.30 (m, 5H), 7.15 (d,  $J = 8.0$  Hz, 1H), 5.80 (d,  $J = 8.1$  Hz, 1H), 5.49 (d,  $J = 9.8$  Hz, 1H), 5.44 (d,  $J = 9.8$  Hz, 1H), 5.35 (d,  $J = 2.8$  Hz, 1H), 5.14 (dd,  $J = 6.6, 2.8$  Hz, 1H), 5.07 (dd,  $J = 6.6, 3.5$  Hz, 1H), 4.72 – 4.68 (m, 3H), 4.40 (dd,  $J = 3.5, 2.3$  Hz, 1H), 1.57 (s, 3H), 1.36 (s, 3H);  $^{13}\text{C}$  NMR (101 MHz,  $\text{CDCl}_3$ )  $\delta$  161.91, 151.68, 142.29, 137.52, 128.41 (2C), 127.87, 127.58 (2C), 117.55, 115.20, 102.97, 99.49, 86.78, 82.89, 79.50, 72.60, 70.48, 62.12, 27.09, 25.10; HRMS (ESI+)  $m/z$  calcd for  $\text{C}_{21}\text{H}_{24}\text{N}_3\text{O}_7$  [ $\text{M} + \text{H}$ ] 430.1614, found: 430.1630. Data for **(R)-2-((3*aR*,4*R*,6*R*,6*aR*)-6-(3-((Benzyloxy)methyl)-2,4-dioxo-3,4-dihydropyrimidin-1(2*H*)-yl)-2,2-dimethyltetrahydrofuro[3,4-*d*][1,3]dioxol-4-yl)-2-hydroxyacetonitrile (*epi-20*):  $^1\text{H}$  NMR (400 MHz, Chloroform-*d*)  $\delta$  7.36 – 7.27 (m, 5H), 7.18 (d,  $J = 8.1$  Hz, 1H), 5.77 (d,  $J = 8.0$  Hz, 1H), 5.49 – 5.41 (m, 3H), 5.10 (dd,  $J = 6.6, 2.9$  Hz, 1H), 5.07 (dd,  $J = 6.5, 2.3$  Hz, 1H), 4.76 (d,  $J = 5.3$  Hz, 1H), 4.68 (s, 2H), 4.36 (dd,  $J = 5.3, 2.9$  Hz, 1H), 1.58 (s, 3H), 1.38 (s, 3H);  $^{13}\text{C}$  NMR (101 MHz,  $\text{CDCl}_3$ )  $\delta$  162.20, 151.16, 141.86, 137.43, 128.40 (2C), 127.89, 127.67 (2C), 117.41, 114.95, 102.67, 98.31, 87.29, 83.40, 80.68, 72.55, 70.42, 61.78, 27.02, 25.06; HRMS (ESI+)  $m/z$  calcd for  $\text{C}_{21}\text{H}_{24}\text{N}_3\text{O}_7$  [ $\text{M} + \text{H}$ ] 430.1614, found: 430.1633.**

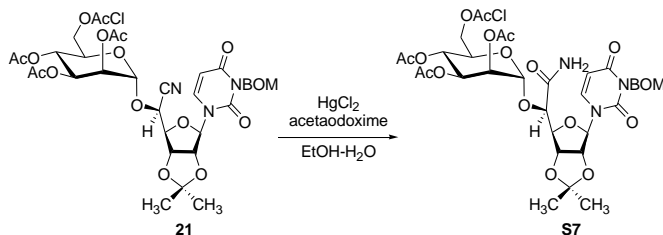

**(2R,3S,4S,5R,6R)-2-((R)-2-Amino-1-((3aR,4S,6R,6aR)-6-(3-((benzyloxy)methyl)-2,4-dioxo-3,4-dihydropyrimidin-1(2H)-yl)-2,2-dimethyltetrahydrofuro[3,4-d][1,3]dioxol-4-yl)-2-oxoethoxy)-6-((2-chloroacetoxy)methyl)tetrahydro-2H-pyran-3,4,5-triyl triacetate (S7).** To a stirred solution of **21** (0.38 g, 0.49 mmol) in a 9:1 mixture of EtOH and H<sub>2</sub>O (4.9 mL) were added HgCl<sub>2</sub> (0.27 g, 0.98 mmol) and acetaoaxime (0.30 mL, 4.9 mmol). After being stirred for 12h at r.t., the reaction mixture was concentrated *in vacuo*. The residue was quenched with aq. NaHCO<sub>3</sub>, extracted with CHCl<sub>3</sub>. The combined organic extracts were dried over Na<sub>2</sub>SO<sub>4</sub> and concentrated *in vacuo*. The crude product was purified by silica gel column chromatography (hexanes/EtOAc = 1/2 - CHCl<sub>3</sub>/MeOH = 97/3) to afford **S7** (0.36 g, 91%): <sup>1</sup>H NMR (400 MHz, Chloroform-*d*) δ 7.38 – 7.27 (m, 6H), 6.41 (brs, 1H), 5.86 (d, *J* = 8.1 Hz, 1H), 5.81 (brs, 1H), 5.70 (d, *J* = 2.1 Hz, 1H), 5.49 (d, *J* = 9.9 Hz, 1H), 5.46 (d, *J* = 9.8 Hz, 1H), 5.33 – 5.26 (m, 2H), 4.98 (dd, *J* = 6.3, 4.9 Hz, 1H), 4.93 – 4.91 (m, 1H), 4.89 (dd, *J* = 6.3, 2.0 Hz, 1H), 4.69 (s, 2H), 4.41 (d, *J* = 4.2 Hz, 1H), 4.33 (t, *J* = 4.6 Hz, 1H), 4.28 (dd, *J* = 12.1, 5.3 Hz, 1H), 4.18 (d, *J* = 2.5 Hz, 1H), 4.16 – 4.11 (m, 2H), 4.10 (s, 2H), 2.14 (s, 3H), 2.05 (s, 3H), 2.00 (s, 3H), 1.57 (s, 3H), 1.37 (s, 3H); <sup>13</sup>C NMR (101 MHz, CDCl<sub>3</sub>) δ 170.19, 170.09, 170.01, 169.63, 166.94, 162.40, 150.62, 140.32, 137.80, 128.29 (2C), 127.69, 127.65 (2C), 115.00, 102.60, 97.38, 93.65, 85.88, 84.08, 79.80, 77.63, 72.31, 70.33, 69.80, 69.05, 68.60, 65.36, 63.41, 40.56, 27.32, 25.55, 20.77, 20.67, 20.63; HRMS (ESI+) *m/z* calcd for C<sub>35</sub>H<sub>43</sub>ClN<sub>3</sub>O<sub>17</sub> [M + H] 812.2281, found: 812.2314.

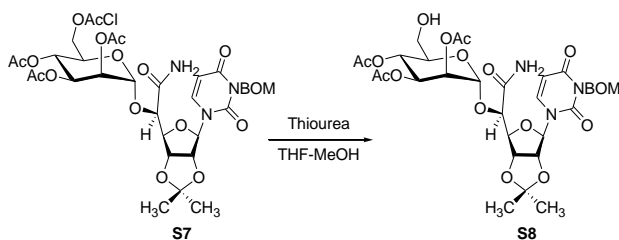

**(2R,3S,4S,5R,6R)-2-((R)-2-Amino-1-((3aR,4S,6R,6aR)-6-(3-((benzyloxy)methyl)-2,4-dioxo-3,4-dihydropyrimidin-1(2H)-yl)-2,2-dimethyltetrahydrofuro[3,4-d][1,3]dioxol-4-yl)-2-oxoethoxy)-6-(hydroxymethyl)tetrahydro-2H-pyran-3,4,5-triyl triacetate (S8).** To a solution of **S7** (0.36 g, 0.45 mmol) in a 1:1 mixture of THF and MeOH (4.5 mL) was added thiourea (0.10 g, 1.34 mmol). After being stirred for 11h at 50 °C, the reaction mixture was concentrated *in vacuo*. The residue was quenched with H<sub>2</sub>O, extracted with CHCl<sub>3</sub>. The combined organic extracts were dried over Na<sub>2</sub>SO<sub>4</sub> and concentrated *in vacuo*. The crude product was purified by silica gel column chromatography (CHCl<sub>3</sub>/MeOH = 98/2 - 97/3 - 96/4) to afford **S8** (0.25 g, 76%): <sup>1</sup>H NMR (400 MHz, Chloroform-*d*) δ 7.39

S8



– 7.27 (m, 6H), 6.43 (brs, 1H), 5.83 (d,  $J = 8.1$  Hz, 1H), 5.74 (brs, 1H), 5.68 (d,  $J = 2.1$  Hz, 1H), 5.46 (s, 2H), 5.33 – 5.27 (m, 2H), 5.18 (t,  $J = 9.9$  Hz, 1H), 5.08 (dd,  $J = 6.5, 4.5$  Hz, 1H), 4.92 – 4.88 (m, 2H), 4.70 (s, 2H), 4.43 (d,  $J = 5.7$  Hz, 1H), 4.33 (dd,  $J = 5.7, 4.5$  Hz, 1H), 3.89 (dt,  $J = 10.0, 3.8$  Hz, 1H), 3.50 (d,  $J = 3.9$  Hz, 2H), 2.14 (s, 3H), 2.05 (s, 3H), 2.01 (s, 3H), 1.56 (s, 3H), 1.35 (s, 3H);  $^{13}\text{C}$  NMR (101 MHz,  $\text{CDCl}_3$ )  $\delta$  170.35, 170.16, 170.10, 170.09, 162.46, 150.72, 140.56, 137.69, 128.33 (2C), 127.74, 127.69 (2C), 114.84, 102.50, 97.03, 94.40, 86.72, 84.25, 80.13, 77.92, 72.35, 72.04, 70.23, 69.20, 68.59, 65.87, 61.25, 27.23, 25.41, 20.81, 20.73, 20.69; HRMS (ESI+)  $m/z$  calcd for  $\text{C}_{33}\text{H}_{42}\text{N}_3\text{O}_{16}$  [ $\text{M} + \text{H}$ ] 736.2565, found: 736.2586.

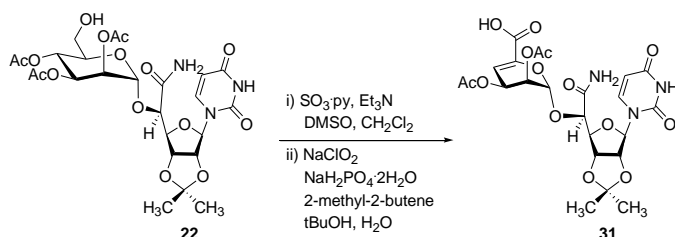

**(2*S*,3*S*,4*S*)-3,4-Diacetoxy-2-((*R*)-2-amino-1-((3*aR*,4*S*,6*R*,6*aR*)-6-(2,4-dioxo-3,4-dihydropyrimidin-1(2*H*)-yl)-2,2-dimethyltetrahydrofuro[3,4-*d*][1,3]dioxol-4-yl)-2-oxoethoxy)-3,4-dihydro-2*H*-pyran-6-carboxylic acid (31).** To a stirred solution of **22** (0.17 g, 0.27 mmol) and DMSO (0.19 mL, 2.72 mmol) in a 5:1 mixture of  $\text{CH}_2\text{Cl}_2$  and  $\text{Et}_3\text{N}$  (1.4 mL) was added  $\text{SO}_3$ -pyridine (0.43 g, 2.72 mmol). After being stirred for 3h at r.t., the reaction mixture was added  $\text{H}_2\text{O}$  (0.27 mL) and passed through a silica gel pad ( $\text{CHCl}_3/\text{MeOH} = 92/8$ ). To a stirred solution of the crude mixture in  $t\text{BuOH}$  (1.0 mL) and 2-methyl-2-butene (0.5 mL) was added a solution of  $\text{NaClO}_2$  (0.12 g, 1.36 mmol) and  $\text{NaH}_2\text{PO}_4 \cdot 2\text{H}_2\text{O}$  (0.21 g, 1.36 mmol) in  $\text{H}_2\text{O}$  (1.0 mL). After being stirred for 5h at r.t., the reaction extracted with  $\text{CHCl}_3/\text{MeOH}$  (9/1). The combined organic extracts were dried over  $\text{Na}_2\text{SO}_4$  and concentrated *in vacuo*. The crude product was purified by silica gel column chromatography ( $\text{CHCl}_3/\text{MeOH} = 9/1$ ) to afford **31** (0.13 g, 81%):  $^1\text{H}$  NMR (400 MHz, Methanol- $d_4$ )  $\delta$  7.88 (d,  $J = 8.1$  Hz, 1H), 5.88 (d,  $J = 3.6$  Hz, 1H), 5.84 (d,  $J = 8.1$  Hz, 1H), 5.80 (dd,  $J = 2.7, 1.5$  Hz, 1H), 5.53 (dd,  $J = 4.5, 2.5$  Hz, 1H), 5.41 (ddd,  $J = 4.7, 3.4, 1.6$  Hz, 1H), 5.28 (d,  $J = 3.3$  Hz, 1H), 4.84 (d,  $J = 1.9$  Hz, 1H), 4.77 (dd,  $J = 6.2, 2.1$  Hz, 1H), 4.73 (d,  $J = 2.1$  Hz, 1H), 4.62 (dd,  $J = 6.1, 3.7$  Hz, 1H), 2.07 (s, 3H), 2.03 (s, 3H), 1.53 (s, 3H), 1.32 (s, 3H);  $^{13}\text{C}$  NMR (101 MHz, MeOD)  $\delta$  172.67, 171.86, 171.50, 168.09, 166.27, 152.17, 148.19, 142.21, 115.19, 104.36, 103.01, 98.08, 93.58, 87.18, 86.07, 82.82, 78.22, 65.27, 65.01, 27.45, 25.47, 20.69, 20.57; HRMS (ESI+)  $m/z$  calcd for  $\text{C}_{23}\text{H}_{28}\text{N}_3\text{O}_{14}$  [ $\text{M} + \text{H}$ ] 570.1571, found: 570.1585.

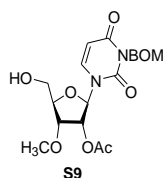

S9

**(2R,5R)-2-(3-((Benzyloxy)methyl)-2,4-dioxo-3,4-dihydropyrimidin-1(2H)-yl)-5-(hydroxymethyl)-4-methoxytetrahydrofuran-3-yl acetate (S9).** The title compound was synthesized according to the reported procedure<sup>1</sup>: <sup>1</sup>H NMR (400 MHz, Chloroform-*d*)  $\delta$  7.58 (d, *J* = 8.2 Hz, 1H), 7.39 – 7.27 (m, 5H), 5.78 (d, *J* = 3.7 Hz, 1H), 5.75 (d, *J* = 8.1 Hz, 1H), 5.46 (d, *J* = 1.7 Hz, 2H), 5.43 (dd, *J* = 4.7, 3.7 Hz, 1H), 4.69 (s, 2H), 4.10 (s, 2H), 4.02 (dd, *J* = 12.2, 1.7 Hz, 1H), 3.80 (dd, *J* = 12.0, 1.8 Hz, 1H), 3.41 (s, 3H), 2.16 (s, 3H); <sup>13</sup>C NMR (101 MHz, CDCl<sub>3</sub>)  $\delta$  169.85, 162.51, 150.87, 139.88, 137.74, 128.31 (2C), 127.68, 127.66 (2C), 102.22, 91.10, 82.75, 73.84, 72.25, 70.30, 61.30, 20.71; HRMS (ESI+) *m/z* calcd for C<sub>20</sub>H<sub>25</sub>N<sub>2</sub>O<sub>8</sub> [M + H] 421.1611, found: 421.1630.

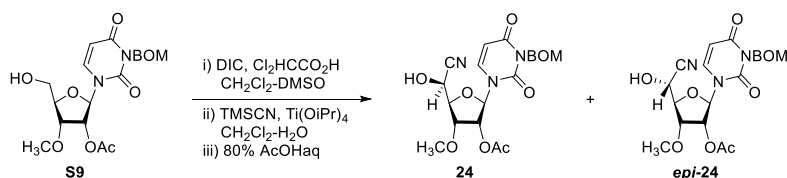

**(2R,5R)-2-(3-((Benzyloxy)methyl)-2,4-dioxo-3,4-dihydropyrimidin-1(2H)-yl)-5-((S)-cyano(hydroxy)methyl)-4-methoxytetrahydrofuran-3-yl acetate (24).** To a stirred solution of S9 (4.14 g, 9.85 mmol) and dichloroacetic acid (1.22 mL, 14.8 mmol) in a 10:1 mixture of CH<sub>2</sub>Cl<sub>2</sub> and DMSO (42.9 mL) was added DIC (3.08 mL, 19.7 mmol) at 0 °C. After being stirred for 2h, H<sub>2</sub>O (0.39 mL), TMSCN (2.46 mL, 19.7 mmol) and Ti(O<sup>*i*</sup>Pr)<sub>4</sub> (5.83 mL, 19.7 mmol) were added to the reaction solution. After being stirred for 8h at r.t., the solution was concentrated *in vacuo*. The crude mixture was suspended to a 4:1 mixture of AcOH and H<sub>2</sub>O (50 mL). After being stirred for 12h at r.t., the solution was concentrated *in vacuo*. The residue was quenched with aq. NaHCO<sub>3</sub>, extracted with EtOAc. The combined organic extracts were dried over Na<sub>2</sub>SO<sub>4</sub> and concentrated *in vacuo*. The crude mixture was purified by silica gel column chromatography (hexanes/EtOAc = 2/1 - 1/2) to afford 1.84 g (42%) of **24** and 1.87 g (43%) of **epi-24**. Data for **24**: <sup>1</sup>H NMR (400 MHz, Chloroform-*d*)  $\delta$  7.38 – 7.26 (m, 6H), 5.79 (d, *J* = 8.1 Hz, 1H), 5.53 (d, *J* = 4.5 Hz, 1H), 5.49 (d, *J* = 5.4 Hz, 1H), 5.46 (d, *J* = 1.5 Hz, 2H), 4.70 (s, 2H), 4.64 (d, *J* = 2.1 Hz, 1H), 4.29 (t, *J* = 5.5 Hz, 1H), 4.24 (dd, *J* = 5.3, 1.9 Hz, 1H), 3.41 (s, 3H), 2.16 (s, 3H); <sup>13</sup>C NMR (101 MHz, CDCl<sub>3</sub>)  $\delta$  169.94, 162.18, 151.22, 141.38, 137.47, 128.41 (2C), 128.39, 127.86, 127.69 (2C), 117.53, 102.82, 94.65, 83.19, 73.05, 72.48, 70.45, 61.21, 59.28, 20.62; HRMS (ESI+) *m/z* calcd for C<sub>21</sub>H<sub>24</sub>N<sub>3</sub>O<sub>8</sub> [M + H] 446.1563, found: 446.1576. Data for **(2R,5R)-2-(3-((Benzyloxy)methyl)-2,4-dioxo-3,4-dihydropyrimidin-1(2H)-yl)-5-((R)-cyano(hydroxy)methyl)-4-methoxytetrahydrofuran-3-yl acetate (epi-24)**: <sup>1</sup>H NMR (400 MHz, Chloroform-*d*)  $\delta$  7.38 – 7.27 (m, 6H), 5.82 (d, *J* = 5.9 Hz, 1H), 5.77 (d, *J* = 8.1 Hz, 1H), 5.45 (d, *J* = 3.1 Hz, 2H), 5.39 (t, *J* = 5.7 Hz, 1H), 4.78 (d, *J* = 2.8 Hz, 1H), 4.69 (s, 2H), 4.31 – 4.25 (m, 2H), 3.46 (s, 3H), 2.15 (s, 3H); <sup>13</sup>C NMR (101 MHz, CDCl<sub>3</sub>)  $\delta$  169.91, 162.39, 151.03, 140.34, 137.37, 128.41 (2C), 127.90, 127.77 (2C), 116.79, 102.81, 91.50, 83.44, 73.02, 72.41, 70.43, 61.44, 58.90, 20.60; HRMS (ESI+) *m/z* calcd for C<sub>21</sub>H<sub>24</sub>N<sub>3</sub>O<sub>8</sub> [M + H] 446.1563, found: 446.1569.

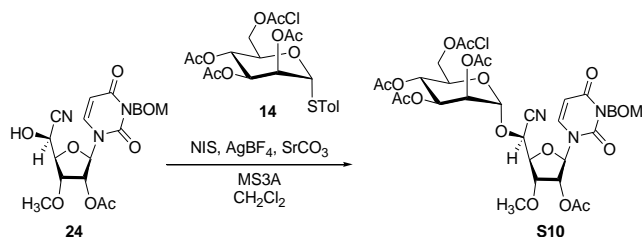

**(2*S*,3*S*,4*S*,5*R*,6*R*)-2-((1*S*)-((2*R*,5*R*)-4-Acetoxy-5-(3-((benzyloxy)methyl)-2,4-dioxo-3,4-dihydropyrimidin-1(2*H*)-yl)-3-methoxytetrahydrofuran-2-yl)(cyano)methoxy)-6-((2-chloroacetoxy)methyl)tetrahydro-2*H*-pyran-3,4,5-triyl triacetate (S10).** To a stirred suspension of **24** (0.72 g, 1.62 mmol), **14** (1.59 g, 3.24 mmol), MS3A (2.2 g) and SrCO<sub>3</sub> (1.20 g, 8.11 mmol) in CH<sub>2</sub>Cl<sub>2</sub> (40.5 mL) were added AgBF<sub>4</sub> (0.16 g, 0.81 mmol) and NIS (1.09 g, 4.86 mmol) at 0 °C. After 13h, the reaction mixture was added Et<sub>3</sub>N (2.0 mL) and passed through a silica gel pad (hexanes/EtOAc = 1/4). The solution was concentrated *in vacuo*. The crude mixture was purified by silica gel column chromatography (hexanes/EtOAc = 2/1 - 1/2) to afford **S10** (1.05 g, 80%): <sup>1</sup>H NMR (400 MHz, Chloroform-*d*) δ 7.39 – 7.28 (m, 6H), 5.94 (d, *J* = 12.1 Hz, 1H), 5.94 (s, 1H), 5.49 (d, *J* = 9.8 Hz, 1H), 5.45 (d, *J* = 9.8 Hz, 1H), 5.38 – 5.28 (m, 3H), 5.19 (d, *J* = 3.4 Hz, 1H), 5.17 – 5.16 (m, 1H), 4.77 (d, *J* = 4.3 Hz, 1H), 4.69 (s, 2H), 4.39 – 4.32 (m, 1H), 4.28 (dd, *J* = 6.2, 4.2 Hz, 1H), 4.22 (dd, *J* = 12.0, 2.5 Hz, 1H), 4.16 – 4.13 (m, 1H), 4.10 (s, 2H), 3.89 (ddd, *J* = 10.2, 5.4, 2.4 Hz, 1H), 3.43 (s, 3H), 2.18 (s, 6H), 2.05 (s, 3H), 2.00 (s, 3H); <sup>13</sup>C NMR (101 MHz, CDCl<sub>3</sub>) δ 169.79, 169.73, 169.54, 169.51, 166.81, 162.19, 150.76, 138.57, 137.70, 128.32 (2C), 127.72, 127.70 (2C), 114.28, 103.37, 96.10, 90.33, 80.52, 77.61, 72.97, 72.29, 70.36, 70.00, 68.49, 68.01, 65.26, 64.29, 63.51, 59.37, 40.53, 20.70, 20.64, 20.62, 20.56; HRMS (ESI+) *m/z* calcd for C<sub>35</sub>H<sub>41</sub>ClN<sub>3</sub>O<sub>17</sub> [M + H] 810.2125, found: 810.2144.

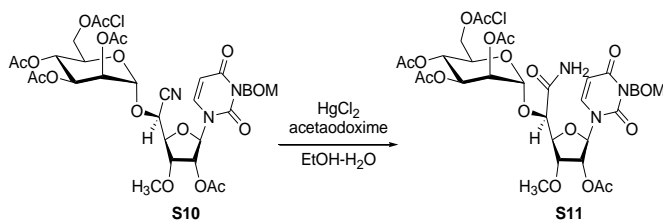

**(2*R*,3*S*,4*S*,5*R*,6*R*)-2-((1*R*)-1-((2*S*,5*R*)-4-Acetoxy-5-(3-((benzyloxy)methyl)-2,4-dioxo-3,4-dihydropyrimidin-1(2*H*)-yl)-3-methoxytetrahydrofuran-2-yl)-2-amino-2-oxoethoxy)-6-((2-chloroacetoxy)methyl)tetrahydro-2*H*-pyran-3,4,5-triyl triacetate (S11).** To a stirred solution of **S10** (1.05 g, 1.30 mmol) in a 9:1 mixture of EtOH and H<sub>2</sub>O (5.0 mL) were added HgCl<sub>2</sub> (0.70 g, 2.59 mmol) and acetaoaxime (0.79 mL, 13.0 mmol). After being stirred for 14h at r.t., the reaction mixture was concentrated *in vacuo*. The residue was quenched with aq. NaHCO<sub>3</sub>, extracted with CHCl<sub>3</sub>. The combined organic extracts were dried over Na<sub>2</sub>SO<sub>4</sub> and concentrated *in vacuo*. The crude product was purified by silica gel column chromatography (hexanes/EtOAc = 1/2 - CHCl<sub>3</sub>/MeOH = 96/4) to afford **S11** (0.87 g, 81%): <sup>1</sup>H NMR (400 MHz, Chloroform-*d*) δ 7.43 (d, *J* = 8.2 Hz, 1H), 7.38 – 7.30 (m, 5H), 6.03 (d, *J* = 8.2 Hz, 1H), 5.95 (d, *J* = 4.0 Hz, 1H), 5.77 – 5.71 (m, 1H),

5.48 (d,  $J = 9.5$  Hz, 1H), 5.45 (d,  $J = 9.3$  Hz, 1H), 5.39 – 5.37 (m, 1H), 5.35 (d,  $J = 10.1$  Hz, 1H), 5.29 – 5.27 (m, 1H), 5.21 (dd,  $J = 10.1, 3.3$  Hz, 1H), 4.99 – 4.98 (m, 1H), 4.69 (s, 2H), 4.42 (dd,  $J = 12.3, 5.2$  Hz, 1H), 4.38 (s, 2H), 4.25 (dd,  $J = 12.2, 2.7$  Hz, 1H), 4.13 (dd,  $J = 9.6, 2.3$  Hz, 1H), 4.11 (d,  $J = 1.8$  Hz, 2H), 4.04 – 4.01 (m, 1H), 3.40 (s, 1H), 3.39 (s, 3H), 2.17 (s, 3H), 2.16 (s, 3H), 2.07 (s, 3H), 2.03 (s, 3H);  $^{13}\text{C}$  NMR (101 MHz,  $\text{CDCl}_3$ )  $\delta$  170.16, 170.06, 169.89, 169.80, 169.61, 166.91, 162.35, 150.77, 138.11, 137.75, 128.36, 128.32 (2C), 127.69 (2C), 103.37, 97.07, 89.01, 81.18, 77.48, 73.01, 72.25, 70.32, 69.99, 68.81, 68.73, 65.20, 63.60, 58.88, 40.59, 21.06, 20.78, 20.67, 20.64; HRMS (ESI+)  $m/z$  calcd for  $\text{C}_{35}\text{H}_{43}\text{ClN}_3\text{O}_{18}$  [ $\text{M} + \text{H}$ ] 828.2230, found: 828.2252.

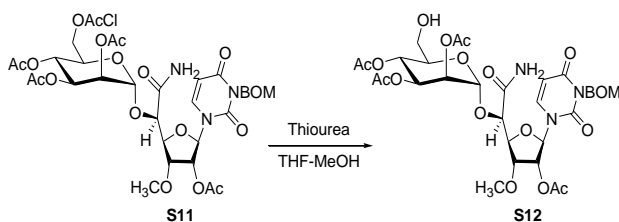

**(2R,3S,4S,5R,6R)-2-((1R)-1-((2S,5R)-4-Acetoxy-5-(3-((benzyloxy)methyl)-2,4-dioxo-3,4-dihydropyrimidin-1(2H)-yl)-3-methoxytetrahydrofuran-2-yl)-2-amino-2-oxoethoxy)-6-(hydroxymethyl)tetrahydro-2H-pyran-3,4,5-triyl triacetate (S12).** To a solution of **S11** (0.87 g, 1.05 mmol) in a 1:1 mixture of THF and MeOH (3.0 mL) was added thiourea (0.24 g, 3.16 mmol). After being stirred for 14h at 50 °C, the reaction mixture was concentrated *in vacuo*. The residue was quenched with  $\text{H}_2\text{O}$ , extracted with  $\text{CHCl}_3$ . The combined organic extracts were dried over  $\text{Na}_2\text{SO}_4$  and concentrated *in vacuo*. The crude product was purified by silica gel column chromatography ( $\text{CHCl}_3/\text{MeOH} = 98/2 - 97/3 - 96/4$ ) to afford **S12** (0.61 g, 77%):  $^1\text{H}$  NMR (400 MHz, Chloroform- $d$ )  $\delta$  7.44 (d,  $J = 8.2$  Hz, 1H), 7.38 – 7.30 (m, 5H), 6.34 (brs, 1H), 6.02 (d,  $J = 8.2$  Hz, 1H), 5.92 (d,  $J = 3.6$  Hz, 1H), 5.72 (brs, 1H), 5.47 (d,  $J = 2.2$  Hz, 2H), 5.39 – 5.36 (m, 1H), 5.30 – 5.25 (m, 2H), 4.98 (d,  $J = 1.8$  Hz, 1H), 4.70 (s, 2H), 4.38 (dt,  $J = 9.4, 3.0$  Hz, 2H), 4.07 – 4.02 (m, 1H), 3.93 – 3.88 (m, 1H), 3.68 – 3.64 (m, 2H), 3.41 (d,  $J = 5.4$  Hz, 1H), 3.36 (s, 3H), 2.16 (s, 3H), 2.16 (s, 3H), 2.08 (s, 3H), 2.04 (s, 3H);  $^{13}\text{C}$  NMR (101 MHz,  $\text{CDCl}_3$ )  $\delta$  170.51, 170.23, 170.19, 170.02, 169.87, 162.39, 150.74, 138.15, 137.75, 128.34 (2C), 127.71, 127.69 (2C), 103.25, 97.28, 89.41, 81.39, 77.51, 73.21, 72.44, 72.28, 70.31, 68.96, 68.79, 65.59, 61.24, 58.92, 20.80, 20.74, 20.68, 20.67; HRMS (ESI+)  $m/z$  calcd for  $\text{C}_{33}\text{H}_{42}\text{N}_3\text{O}_{17}$  [ $\text{M} + \text{H}$ ] 752.2514, found: 752.2535.

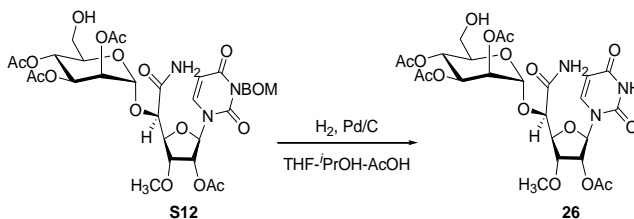

**(2R,3S,4S,5R,6R)-2-((1R)-1-((2S,5R)-4-Acetoxy-5-(2,4-dioxo-3,4-dihydropyrimidin-1(2H)-yl)-3-methoxytetrahydrofuran-2-yl)-2-amino-2-oxoethoxy)-6-(hydroxymethyl)tetrahydro-2H-pyran-3,4,5-triyl triacetate (26).** To a stirred solution of **S12** (0.61 g, 0.81 mmol) and AcOH (0.12 mL) in a 1:1 mixture of THF and <sup>1</sup>PrOH (6.0 mL) was added Pd/C (0.49 g). H<sub>2</sub> gas was introduced and the reaction mixture was stirred under H<sub>2</sub> atmosphere. After being stirred for 5h at r.t., the solution was filtered through Celite and concentrated *in vacuo*. The crude product was purified by silica gel column chromatography (CHCl<sub>3</sub>/MeOH = 97/3 - 92/8) to afford **26** (0.39 g, 77%): <sup>1</sup>H NMR (400 MHz, Chloroform-*d*) δ 9.29 (brs, 1H), 7.53 (d, *J* = 8.1 Hz, 1H), 6.93 (brs, 1H), 6.00 (d, *J* = 4.5 Hz, 2H), 5.90 (d, *J* = 8.2 Hz, 1H), 5.54 (dd, *J* = 3.3, 1.7 Hz, 1H), 5.37 (t, *J* = 4.7 Hz, 1H), 5.12 (dd, *J* = 9.9, 3.3 Hz, 1H), 4.97 (d, *J* = 1.6 Hz, 1H), 4.51 (dd, *J* = 12.1, 5.6 Hz, 1H), 4.46 (dd, *J* = 5.7, 1.8 Hz, 1H), 4.41 (d, *J* = 1.8 Hz, 1H), 4.38 (dd, *J* = 12.2, 2.2 Hz, 1H), 4.18 (t, *J* = 5.3 Hz, 1H), 4.02 (ddd, *J* = 7.8, 5.6, 2.0 Hz, 1H), 3.90 (t, *J* = 9.9 Hz, 1H), 3.40 (s, 3H), 2.15 (s, 6H), 2.13 (s, 3H), 2.07 (s, 3H); <sup>13</sup>C NMR (101 MHz, CDCl<sub>3</sub>) δ 171.25, 171.00, 170.66, 170.41, 163.33, 150.05, 139.56, 103.71, 96.81, 87.36, 81.28, 77.46, 75.50, 73.04, 72.36, 71.12, 68.99, 65.05, 63.24, 58.56, 20.82, 20.81, 20.74, 20.72; HRMS (ESI+) *m/z* calcd for C<sub>25</sub>H<sub>34</sub>N<sub>3</sub>O<sub>16</sub> [M + H] 632.1939, found: 632.1958.

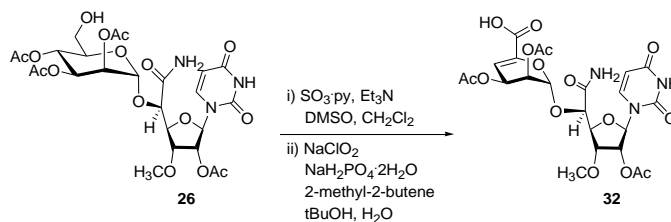

**(2S,3S,4S)-3,4-Diacetoxy-2-((1R)-1-((2S,5R)-4-acetoxy-5-(2,4-dioxo-3,4-dihydropyrimidin-1(2H)-yl)-3-methoxytetrahydrofuran-2-yl)-2-amino-2-oxoethoxy)-3,4-dihydro-2H-pyran-6-carboxylic acid (32).** To a stirred solution of **26** (0.39 g, 0.62 mmol) and DMSO (0.44 mL, 6.23 mmol) in a 5:1 mixture of CH<sub>2</sub>Cl<sub>2</sub> and Et<sub>3</sub>N (3.1 mL) was added SO<sub>3</sub>·pyridine (0.99 g, 6.23 mmol). After being stirred for 1h at r.t., the reaction mixture was added H<sub>2</sub>O (0.62 mL) and passed through a silica gel pad (CHCl<sub>3</sub>/MeOH = 93/7). To a stirred solution of the crude mixture in <sup>1</sup>BuOH (2.0 mL) and 2-methyl-2-butene (1.0 mL) was added a solution of NaClO<sub>2</sub> (0.28 g, 3.11 mmol) and NaH<sub>2</sub>PO<sub>4</sub>·2H<sub>2</sub>O (0.49 g, 3.11 mmol) in H<sub>2</sub>O (2.0 mL). After being stirred for 2h at r.t., the reaction extracted with CHCl<sub>3</sub>/MeOH (9/1). The combined organic extracts were dried over Na<sub>2</sub>SO<sub>4</sub> and concentrated *in vacuo*. The crude product was purified by silica gel column chromatography (CHCl<sub>3</sub>/MeOH = 9/1) to afford **32** (0.30 g, 82%): <sup>1</sup>H NMR (400 MHz, Methanol-*d*<sub>4</sub>) δ 7.80 (d, *J* = 8.2 Hz, 1H), 5.95 (d, *J* = 4.9 Hz, 1H), 5.92 (d, *J* = 8.1 Hz, 1H), 5.80 – 5.78 (m, 1H), 5.70 (dd, *J* = 4.5, 2.5 Hz, 1H), 5.59 – 5.56 (m, 1H), 5.31 (d, *J* = 3.2 Hz, 1H), 5.29 (t, *J* = 5.1 Hz, 1H), 4.80 (d, *J* = 1.9 Hz, 1H), 4.47 (dd, *J* = 4.8, 1.8 Hz, 1H), 3.93 (t, *J* = 5.0 Hz, 1H), 3.40 (s, 3H), 2.08 (s, 3H), 2.08 (s, 3H), 2.05 (s, 3H); <sup>13</sup>C NMR (101 MHz, MeOD) δ 173.04, 172.10, 171.63, 171.35, 168.19, 166.08, 152.15, 148.06, 141.34, 104.67, 103.84, 97.92, 88.21, 84.13, 79.65, 76.98, 75.16, 65.37, 65.05, 59.67, 20.77, 20.57, 20.44; HRMS (ESI+) *m/z* calcd for C<sub>23</sub>H<sub>28</sub>N<sub>3</sub>O<sub>15</sub> [M + H] 586.1520, found: 586.1543.

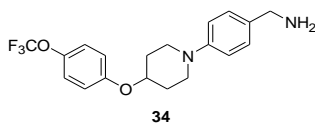

**(4-(4-(4-(Trifluoromethoxy)phenoxy)piperidin-1-yl)phenyl)methanamine (34).** The title compound was synthesized according to the reported procedure<sup>2</sup>: <sup>1</sup>H NMR (400 MHz, CDCl<sub>3</sub>) δ 7.21 (d, *J* = 8.2 Hz, 2H), 7.14 (d, *J* = 8.6 Hz, 2H), 6.97 – 6.87 (m, 4H), 4.43 (tt, *J* = 7.7, 3.8 Hz, 1H), 3.79 (s, 2H), 3.49 (ddd, *J* = 11.7, 7.2, 3.7 Hz, 2H), 3.09 (ddd, *J* = 12.2, 8.2, 3.6 Hz, 2H), 2.15 – 2.06 (m, 2H), 1.98 – 1.88 (m, 2H); <sup>13</sup>C NMR (101 MHz, CDCl<sub>3</sub>) δ 155.8, 150.2, 142.8, 134.6, 128.0 (2C), 122.5 (2C), 116.83 (2C), 116.76 (2C), 72.9, 46.9 (2C), 45.9, 30.4 (2C); HRMS (ESI+) *m/z* calcd for C<sub>19</sub>H<sub>22</sub>F<sub>3</sub>N<sub>2</sub>O<sub>2</sub> [M + H] 367.1633, found 367.1628.

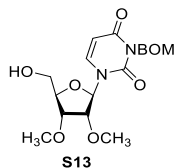

**3-((Benzyloxy)methyl)-1-((2R,5R)-5-(hydroxymethyl)-3,4-dimethoxytetrahydrofuran-2-yl)pyrimidine-2,4(1H,3H)-dione (S13).** The title compound was synthesized according to the reported procedure<sup>1</sup>: <sup>1</sup>H NMR (400 MHz, Chloroform-*d*) δ 7.81 (d, *J* = 8.1 Hz, 1H), 7.39 – 7.23 (m, 5H), 5.74 (d, *J* = 4.6 Hz, 2H), 5.73 (d, *J* = 6.4 Hz, 2H), 5.47 (d, *J* = 1.4 Hz, 2H), 4.71 (s, 2H), 4.17 (dt, *J* = 6.9, 2.2 Hz, 1H), 4.08 – 4.03 (m, 2H), 3.91 (dd, *J* = 6.8, 4.9 Hz, 1H), 3.80 (dd, *J* = 12.3, 2.2 Hz, 1H), 3.59 (s, 3H), 3.45 (s, 3H); <sup>13</sup>C NMR (101 MHz, CDCl<sub>3</sub>) δ 162.72, 150.80, 139.99, 137.74, 128.29 (2C), 127.70, 127.63 (2C), 101.61, 90.64, 82.30, 81.06, 76.53, 72.30, 70.19, 60.93, 58.41, 58.15; HRMS (ESI+) *m/z* calcd for C<sub>19</sub>H<sub>25</sub>N<sub>2</sub>O<sub>7</sub> [M + H] 393.1662, found 393.1675.

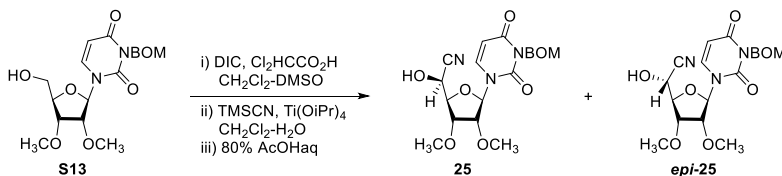

**(2S)-2-((2R,5R)-5-(3-((Benzyloxy)methyl)-2,4-dioxo-3,4-dihydropyrimidin-1(2H)-yl)-3,4-dimethoxytetrahydrofuran-2-yl)-2-hydroxyacetonitrile (25).** To a stirred solution of S13 (1.76 g, 4.48 mmol) and dichloroacetic acid (0.55 mL, 6.73 mmol) in a 10:1 mixture of CH<sub>2</sub>Cl<sub>2</sub> and DMSO (19.7 mL) was added DIC (1.40 mL, 8.97 mmol) at 0 °C. After being stirred for 3h, H<sub>2</sub>O (0.18 mL), TMSCN (0.85 mL, 8.97 mmol) and Ti(O<sup>*i*</sup>Pr)<sub>4</sub> (2.65

mL, 8.97 mmol) were added to the reaction solution. After being stirred for 6h at r.t., the solution was concentrated *in vacuo*. The crude mixture was suspended to a 4:1 mixture of AcOH and H<sub>2</sub>O (25 mL). After being stirred for 10h at r.t., the solution was concentrated *in vacuo*. The residue was quenched with aq. NaHCO<sub>3</sub>, extracted with EtOAc. The combined organic extracts were dried over Na<sub>2</sub>SO<sub>4</sub> and concentrated *in vacuo*. The crude mixture was purified by silica gel column chromatography (hexanes/EtOAc = 2/1 - 1/2) to afford 0.73 g (39%) of **25** and 0.73 g (39%) of *epi*-**25**. Data for **25**: <sup>1</sup>H NMR (400 MHz, Chloroform-*d*) δ 7.39 – 7.30 (m, 6H), 5.79 (d, *J* = 8.1 Hz, 1H), 5.48 (s, 2H), 5.47 – 5.44 (m, 1H), 4.71 (s, 2H), 4.63 (d, *J* = 2.1 Hz, 1H), 4.37 (t, *J* = 5.4 Hz, 1H), 4.34 (dd, *J* = 4.0, 2.0 Hz, 1H), 4.02 (dd, *J* = 5.4, 4.0 Hz, 1H), 3.50 (s, 3H), 3.48 (s, 3H); <sup>13</sup>C NMR (101 MHz, CDCl<sub>3</sub>) δ 162.14, 151.22, 141.68, 137.54, 128.40 (2C), 127.84, 127.67 (2C), 117.49, 102.76, 94.96, 82.95, 79.40, 77.56, 72.50, 70.39, 61.69, 58.60, 58.44; HRMS (ESI+) *m/z* calcd for C<sub>20</sub>H<sub>24</sub>N<sub>3</sub>O<sub>7</sub> [M + H] 418.1614, found 418.1633. Data for **(2R)-2-((2R,5R)-5-(3-((Benzyloxy)methyl)-2,4-dioxo-3,4-dihydropyrimidin-1(2H)-yl)-3,4-dimethoxytetrahydrofuran-2-yl)-2-hydroxyacetonitrile (epi-25)**: <sup>1</sup>H NMR (400 MHz, Chloroform-*d*) δ 7.38 – 7.27 (m, 6H), 5.78 (d, *J* = 8.1 Hz, 1H), 5.57 (d, *J* = 6.3 Hz, 1H), 5.47 (d, *J* = 9.7 Hz, 1H), 5.44 (d, *J* = 9.7 Hz, 1H), 4.78 (d, *J* = 2.5 Hz, 1H), 4.70 (s, 2H), 4.34 – 4.30 (m, 2H), 4.12 (dd, *J* = 5.4, 2.9 Hz, 1H), 3.53 (s, 3H), 3.49 (s, 3H); <sup>13</sup>C NMR (101 MHz, CDCl<sub>3</sub>) δ 162.26, 151.07, 141.31, 137.41, 128.41, 127.90, 127.71, 116.84, 102.73, 93.60, 83.46, 79.51, 77.23, 72.49, 70.38, 61.91, 58.49, 58.11; HRMS (ESI+) *m/z* calcd for C<sub>20</sub>H<sub>24</sub>N<sub>3</sub>O<sub>7</sub> [M + H] 418.1614, found 418.1638.

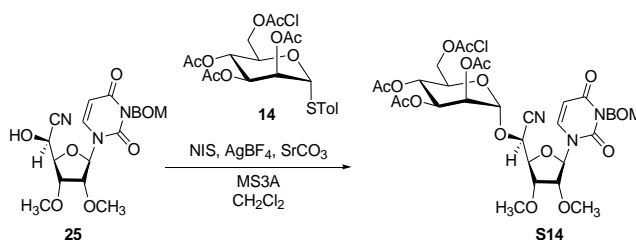

**(2S,3S,4S,5R,6R)-2-((1S)-((2R,5R)-5-(3-((Benzyloxy)methyl)-2,4-dioxo-3,4-dihydropyrimidin-1(2H)-yl)-3,4-dimethoxytetrahydrofuran-2-yl)(cyano)methoxy)-6-((2-chloroacetoxy)methyl)tetrahydro-2H-pyran-3,4,5-triyl triacetate (S14)**. To a stirred suspension of **25** (0.20 g, 0.48 mmol), **14** (0.47 g, 0.95 mmol), MS3A (0.60 g) and SrCO<sub>3</sub> (0.35 g, 2.39 mmol) in CH<sub>2</sub>Cl<sub>2</sub> (11.9 mL) were added AgBF<sub>4</sub> (0.047 g, 0.24 mmol) and NIS (0.21 g, 0.95 mmol) at 0 °C. After being stirred for 20h, the reaction mixture was added Et<sub>3</sub>N (2.0 mL) and passed through a silica gel pad (hexanes/EtOAc = 1/4). The solution was concentrated *in vacuo*. The crude mixture was purified by silica gel column chromatography (hexanes/EtOAc = 2/1 - 1/2) to afford **S14** (0.32 g, 87%): <sup>1</sup>H NMR (400 MHz, Chloroform-*d*) δ 7.46 (d, *J* = 8.3 Hz, 1H), 7.39 – 7.27 (m, 5H), 6.04 (d, *J* = 8.3 Hz, 1H), 5.96 (d, *J* = 2.1 Hz, 1H), 5.49 (d, *J* = 9.7 Hz, 1H), 5.46 (d, *J* = 9.7 Hz, 1H), 5.40 (dd, *J* = 3.4, 2.0 Hz, 1H), 5.29 (t, *J* = 10.0 Hz, 1H), 5.19 (d, *J* = 1.9 Hz, 1H), 5.12 (dd, *J* = 10.1, 3.4 Hz, 1H), 4.77 (d, *J* = 3.1 Hz, 1H), 4.71 (s, 2H), 4.39 (dd, *J* = 7.6, 3.1 Hz, 1H), 4.35 – 4.27 (m, 2H), 4.11 (s, 2H), 4.02 – 3.96 (m, 1H), 3.85 (dd, *J* = 7.7, 5.0 Hz, 1H), 3.77 (dd, *J* = 10.0, 4.6 Hz, 1H), 3.63 (s, 3H), 3.43 (s, 3H), 2.19 (s, 3H), 2.06 (s, 3H), 2.01 (s, 3H); <sup>13</sup>C NMR (101 MHz, CDCl<sub>3</sub>) δ 169.76, 169.50, 169.46, 166.84, 162.35, 150.71, 137.75, 137.25,

128.31 (2C), 127.71 (2C), 114.36, 103.02, 95.84, 89.16, 80.49, 80.45, 79.68, 72.28, 70.25, 70.21, 68.50, 67.79, 65.03, 63.44, 62.75, 58.57, 58.08, 40.50, 20.68, 20.63, 20.62, 20.53; HRMS (ESI+)  $m/z$  calcd for  $C_{34}H_{41}ClN_3O_{16}$  [M + H] 782.2175, found 782.2197.

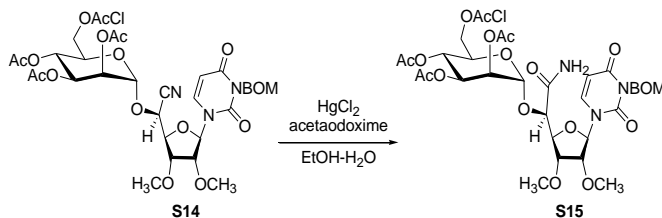

**(2R,3S,4S,5R,6R)-2-((1R)-2-Amino-1-((2S,5R)-5-(3-((benzyloxy)methyl)-2,4-dioxo-3,4-dihydropyrimidin-1(2H)-yl)-3,4-dimethoxytetrahydrofuran-2-yl)-2-oxoethoxy)-6-((2-chloroacetoxy)methyl)tetrahydro-2H-pyran-3,4,5-triyl triacetate (S15).** To a stirred solution of **S14** (0.32 g, 0.42 mmol) in a 9:1 mixture of EtOH and H<sub>2</sub>O (4.2 mL) were added HgCl<sub>2</sub> (0.23 g, 0.83 mmol) and acetaaldoxime (0.25 mL, 4.15 mmol). After being stirred for 11h at r.t., the reaction mixture was concentrated *in vacuo*. The residue was quenched with aq. NaHCO<sub>3</sub>, extracted with CHCl<sub>3</sub>. The combined organic extracts were dried over Na<sub>2</sub>SO<sub>4</sub> and concentrated *in vacuo*. The crude product was purified by silica gel column chromatography (hexanes/EtOAc = 1/2 - CHCl<sub>3</sub>/MeOH = 96/4) to afford **S15** (0.29 g, 88%): <sup>1</sup>H NMR (400 MHz, Chloroform-*d*) δ 7.59 (d, *J* = 8.2 Hz, 1H), 7.39 – 7.27 (m, 5H), 6.35 (brs, 1H), 6.08 (d, *J* = 8.1 Hz, 1H), 5.89 (d, *J* = 1.1 Hz, 1H), 5.83 (brs, 1H), 5.48 (d, *J* = 9.7 Hz, 1H), 5.45 (d, *J* = 9.7 Hz, 1H), 5.41 (dd, *J* = 3.4, 1.9 Hz, 1H), 5.30 (d, *J* = 10.0 Hz, 1H), 5.17 (dd, *J* = 10.1, 3.4 Hz, 1H), 5.03 (d, *J* = 1.9 Hz, 1H), 4.71 (s, 2H), 4.48 (dd, *J* = 8.8, 2.6 Hz, 1H), 4.41 (d, *J* = 2.6 Hz, 1H), 4.34 (dd, *J* = 12.2, 5.5 Hz, 1H), 4.27 (dd, *J* = 12.2, 2.5 Hz, 1H), 4.11 (s, 2H), 3.91 (dd, *J* = 4.8, 1.1 Hz, 1H), 3.90 – 3.85 (m, 1H), 3.76 (dd, *J* = 8.7, 4.8 Hz, 1H), 3.63 (s, 3H), 3.38 (s, 3H), 2.17 (s, 3H), 2.07 (s, 3H), 2.03 (s, 3H); HRMS (ESI+)  $m/z$  calcd for  $C_{34}H_{43}ClN_3O_{17}$  [M + H] 800.2281, found 800.2314.

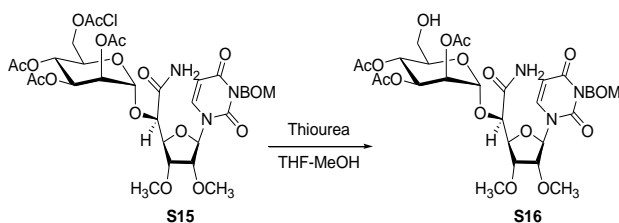

**(2R,3S,4S,5R,6R)-2-((1R)-2-Amino-1-((2S,5R)-5-(3-((benzyloxy)methyl)-2,4-dioxo-3,4-dihydropyrimidin-1(2H)-yl)-3,4-dimethoxytetrahydrofuran-2-yl)-2-oxoethoxy)-6-(hydroxymethyl)tetrahydro-2H-pyran-3,4,5-triyl triacetate (S16).** To a solution of **S15** (0.29 g, 0.37 mmol) in a 1:1 mixture of THF and MeOH (1.0 mL) was added thiourea (0.065 g, 0.86 mmol). After being stirred for 8h at 50 °C, the reaction mixture was concentrated *in vacuo*. The residue was quenched with H<sub>2</sub>O, extracted with CHCl<sub>3</sub>. The combined organic extracts were dried over Na<sub>2</sub>SO<sub>4</sub> and concentrated *in vacuo*. The crude

**S16**



product was purified by silica gel column chromatography (CHCl<sub>3</sub>/MeOH = 98/2 - 97/3 - 96/4) to afford **S16** (0.21 g, 78%): <sup>1</sup>H NMR (400 MHz, Chloroform-*d*) δ 7.61 (d, *J* = 8.2 Hz, 1H), 7.40 – 7.28 (m, 5H), 6.43 (brs, 1H), 6.06 (d, *J* = 8.2 Hz, 1H), 5.87 (d, *J* = 1.2 Hz, 1H), 5.84 (brs, 1H), 5.47 (d, *J* = 1.5 Hz, 2H), 5.42 (dd, *J* = 3.4, 1.8 Hz, 1H), 5.29 (t, *J* = 9.9 Hz, 1H), 5.20 (dd, *J* = 10.2, 3.4 Hz, 1H), 5.02 (d, *J* = 1.7 Hz, 1H), 4.71 (s, 2H), 4.48 – 4.43 (m, 2H), 3.91 (dd, *J* = 4.8, 1.3 Hz, 1H), 3.76 (dd, *J* = 8.5, 4.8 Hz, 1H), 3.74 – 3.69 (m, 1H), 3.67 – 3.63 (m, 2H), 3.63 (s, 3H), 3.38 (s, 3H), 2.16 (s, 3H), 2.08 (s, 3H), 2.03 (s, 3H); <sup>13</sup>C NMR (101 MHz, CDCl<sub>3</sub>) δ 170.33, 170.18, 170.15, 170.13, 162.57, 150.64, 137.77, 137.44, 128.32 (2C), 127.71 (2C), 102.65, 96.73, 89.00, 80.73, 80.69, 75.21, 72.29, 72.26, 70.16, 68.81, 68.76, 65.49, 61.03, 58.46, 57.73, 20.80, 20.74, 20.67; HRMS (ESI+) *m/z* calcd for C<sub>32</sub>H<sub>42</sub>N<sub>3</sub>O<sub>16</sub> [M + H] 724.2565, found 724.2599.

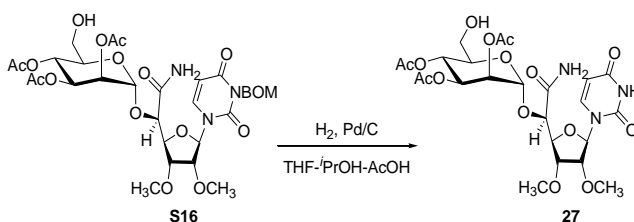

**(2*R*,3*S*,4*S*,5*R*,6*R*)-2-((1*R*)-2-Amino-1-((2*S*,5*R*)-5-(2,4-dioxo-3,4-dihydropyrimidin-1(2*H*)-yl)-3,4-dimethoxytetrahydrofuran-2-yl)-2-oxoethoxy)-6-(hydroxymethyl)tetrahydro-2*H*-pyran-3,4,5-triyl triacetate (**27**)**. To a stirred solution of **S16** (0.21 g, 0.29 mmol) and AcOH (0.04 mL) in a 1:1 mixture of THF and *i*PrOH (2.0 mL) was added Pd/C (0.16 g). H<sub>2</sub> gas was introduced and the reaction mixture was stirred under H<sub>2</sub> atmosphere. After being stirred for 4h at r.t., the solution was filtered through Celite and concentrated *in vacuo*. The crude product was purified by silica gel column chromatography (CHCl<sub>3</sub>/MeOH = 97/3 - 92/8) to afford **27** (0.14 g, 82%): <sup>1</sup>H NMR (400 MHz, Chloroform-*d*) δ 9.56 (brs, 1H), 7.62 (d, *J* = 8.1 Hz, 1H), 7.16 (brs, 1H), 6.05 (brs, 1H), 5.94 (s, 1H), 5.91 (d, *J* = 8.1 Hz, 1H), 5.59 – 5.56 (m, 1H), 5.03 (dd, *J* = 9.6, 3.3 Hz, 1H), 4.98 (s, 1H), 4.53 (dd, *J* = 12.1, 4.8 Hz, 1H), 4.49 – 4.44 (m, 2H), 4.34 (d, *J* = 12.0 Hz, 1H), 4.00 (dd, *J* = 8.6, 4.8 Hz, 1H), 3.90 (d, *J* = 5.5 Hz, 1H), 3.87 (d, *J* = 10.0 Hz, 1H), 3.83 – 3.77 (m, 1H), 3.59 (s, 3H), 3.43 (s, 3H), 2.16 (s, 3H), 2.14 (s, 3H), 2.07 (s, 3H); <sup>13</sup>C NMR (101 MHz, CDCl<sub>3</sub>) δ 171.66, 171.02, 170.90, 170.52, 163.75, 149.93, 138.98, 103.07, 96.65, 87.79, 81.38, 80.68, 76.11, 73.90, 72.11, 71.18, 68.76, 64.67, 62.78, 58.35, 57.46, 20.81 (2C), 20.76; HRMS (ESI+) *m/z* calcd for C<sub>24</sub>H<sub>34</sub>N<sub>3</sub>O<sub>15</sub> [M + H] 604.1990, found 604.2014.

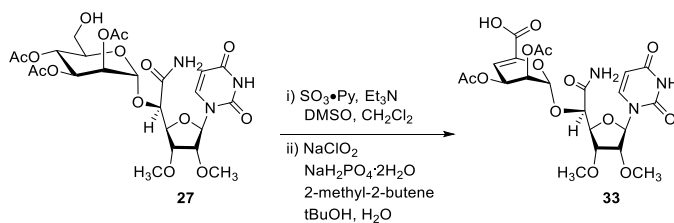

**(2S,3S,4S)-3,4-Diacetoxy-2-((1R)-2-amino-1-((2S,5R)-5-(2,4-dioxo-3,4-dihydropyrimidin-1(2H)-yl)-3,4-dimethoxytetrahydrofuran-2-yl)-2-oxoethoxy)-3,4-dihydro-2H-pyran-6-carboxylic acid (33).** To a stirred solution of **27** (0.14 g, 0.23 mmol) and DMSO (0.17 mL, 2.34 mmol) in a 5:1 mixture of CH<sub>2</sub>Cl<sub>2</sub> and Et<sub>3</sub>N (1.2 mL) was added SO<sub>3</sub>·pyridine (0.39 g, 2.34 mmol). After being stirred for 3h at r.t., the reaction mixture was added H<sub>2</sub>O (0.23 mL) and passed through a silica gel pad (CHCl<sub>3</sub>/MeOH = 92/8). To a stirred solution of the crude mixture in *t*BuOH (1.0 mL) and 2-methyl-2-butene (0.5 mL) was added a solution of NaClO<sub>2</sub> (0.11 g, 1.17 mmol) and NaH<sub>2</sub>PO<sub>4</sub>·2H<sub>2</sub>O (0.18 g, 1.17 mmol) in H<sub>2</sub>O (1.0 mL). After being stirred for 5h at r.t., the reaction extracted with CHCl<sub>3</sub>/MeOH (9/1). The combined organic extracts were dried over Na<sub>2</sub>SO<sub>4</sub> and concentrated *in vacuo*. The crude product was purified by silica gel column chromatography (CHCl<sub>3</sub>/MeOH = 9/1) to afford **33** (0.11 g, 85%): <sup>1</sup>H NMR (400 MHz, Methanol-*d*<sub>4</sub>) δ 7.78 (d, *J* = 8.2 Hz, 1H), 5.94 (s, 1H), 5.92 (d, *J* = 3.2 Hz, 1H), 5.82 (t, *J* = 2.1 Hz, 1H), 5.66 (dd, *J* = 4.6, 2.5 Hz, 1H), 5.57 (ddd, *J* = 4.7, 3.2, 1.6 Hz, 1H), 5.31 (d, *J* = 3.2 Hz, 1H), 4.78 (d, *J* = 1.9 Hz, 1H), 4.51 (dd, *J* = 4.4, 1.9 Hz, 1H), 3.87 (t, *J* = 4.7 Hz, 1H), 3.82 (t, *J* = 5.0 Hz, 1H), 3.45 (s, 3H), 3.44 (s, 3H), 2.09 (s, 3H), 2.06 (s, 3H); <sup>13</sup>C NMR (101 MHz, MeOD) δ 173.20, 172.12, 171.62, 168.06, 166.08, 152.12, 148.47, 141.11, 104.32, 103.83, 98.17, 87.88, 83.90, 83.29, 78.97, 77.77, 65.15, 65.06, 58.88, 58.65, 20.76, 20.58; HRMS (ESI+) *m/z* calcd for C<sub>22</sub>H<sub>28</sub>N<sub>3</sub>O<sub>14</sub> [M + H] 558.1571, found 558.1595.

#### HPLC analysis of I-CAP (**3**)

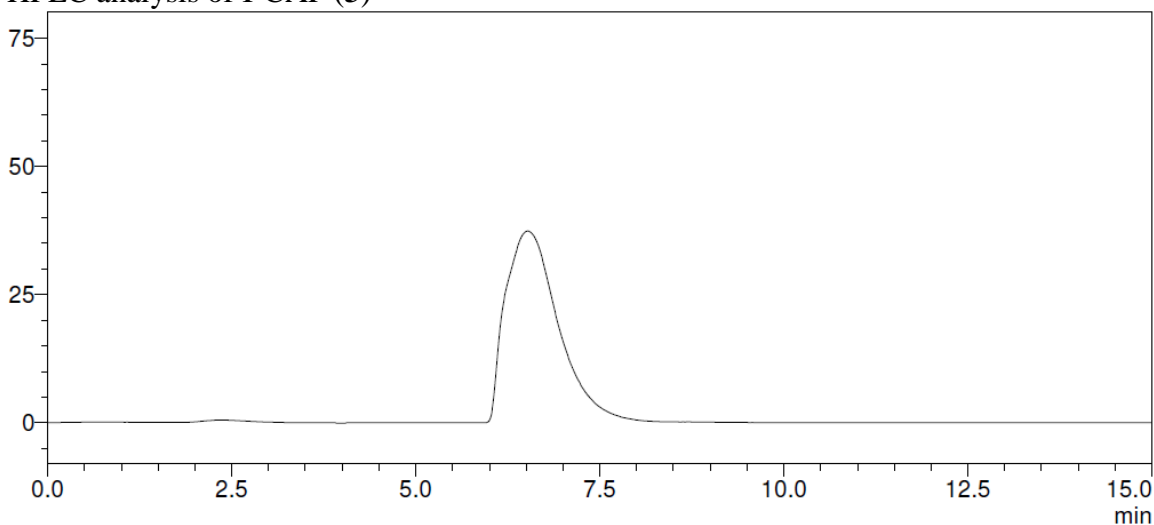

Area % purity: 97.7%

Conditions:

column: Kinetex® (C18, 5 μm, 100 Å, 250 x 4.60 mm), solvents: 30:70 MeOH:H<sub>2</sub>O, flow rate: 1.0 mL/min, UV: 254 nm

#### HPLC analysis of DM-CAP (4)

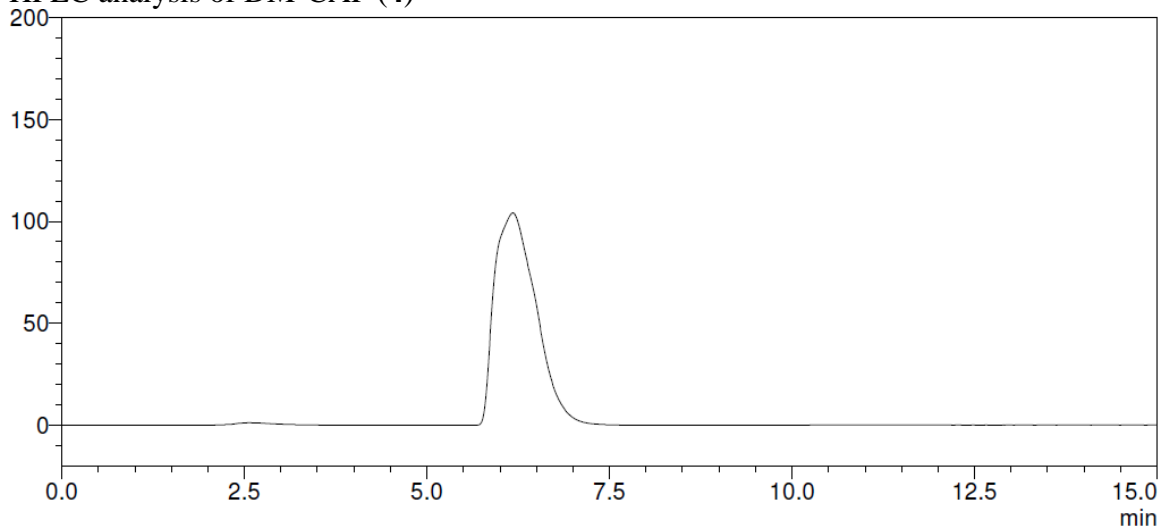

Area % purity: 97.8%

Conditions:

column: Kinetex® (C18, 5  $\mu\text{m}$ , 100  $\text{\AA}$ , 250 x 4.60 mm), solvents: 30:70 MeOH:H<sub>2</sub>O, flow rate: 1.0 mL/min, UV: 254 nm

#### HPLC analysis of CPPB (5)

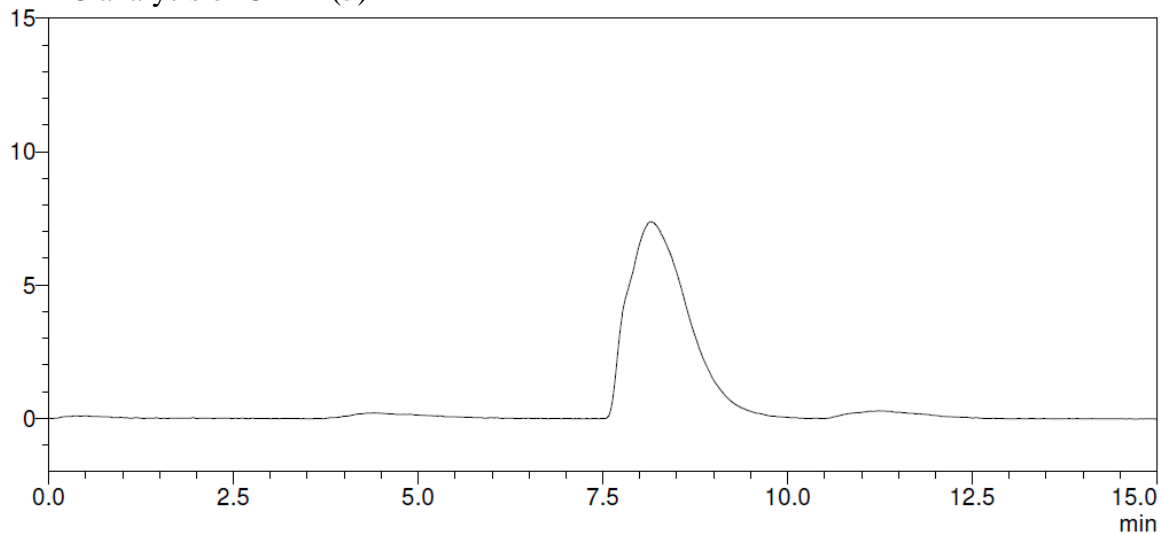

Area % purity: 95.2%

Conditions:

column: Kinetex® (C18, 5  $\mu\text{m}$ , 100  $\text{\AA}$ , 250 x 4.60 mm), solvents: 30:70 MeOH:H<sub>2</sub>O, flow rate: 1.0 mL/min, UV: 254 nm

### HPLC analysis of I-CPPB (6)

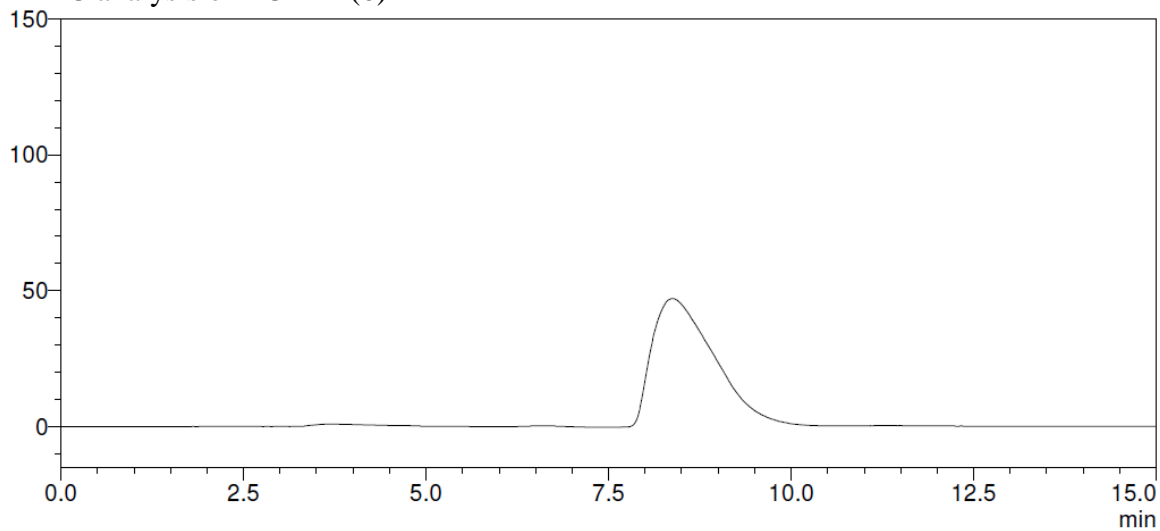

Area % purity: 98.9%

Conditions:

column: Kinetex® (C18, 5  $\mu\text{m}$ , 100  $\text{\AA}$ , 250 x 4.60 mm), solvents: 30:70 MeOH:H<sub>2</sub>O, flow rate: 1.0 mL/min, UV: 254 nm

### HPLC analysis of OM-CPPB (7)

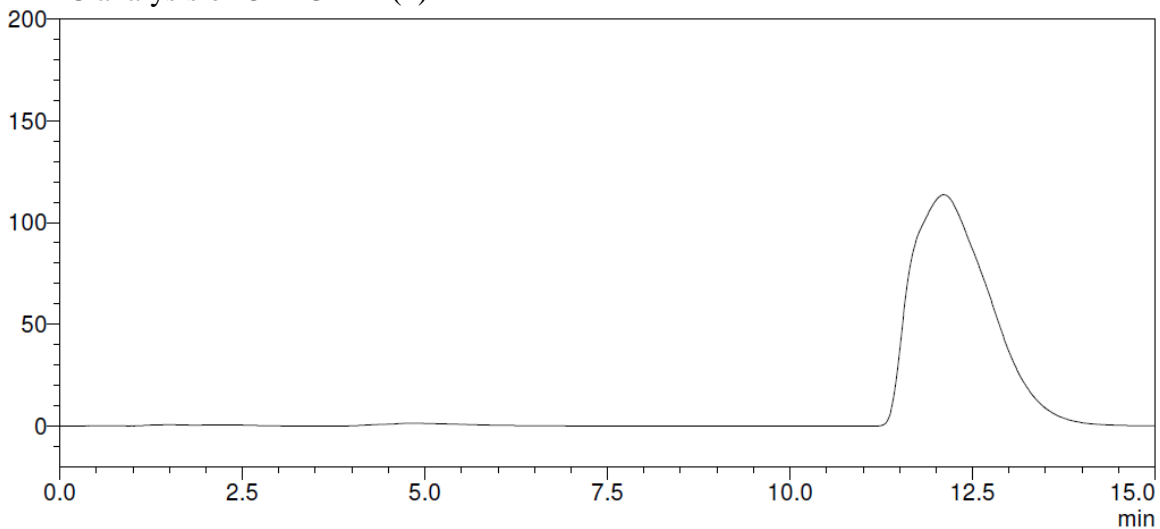

Area % purity: 97.1%

Conditions:

column: Kinetex® (C18, 5  $\mu\text{m}$ , 100  $\text{\AA}$ , 250 x 4.60 mm), solvents: 30:70 MeOH:H<sub>2</sub>O, flow rate: 1.0 mL/min, UV: 254 nm

### HPLC analysis of DM-CPPB (8)

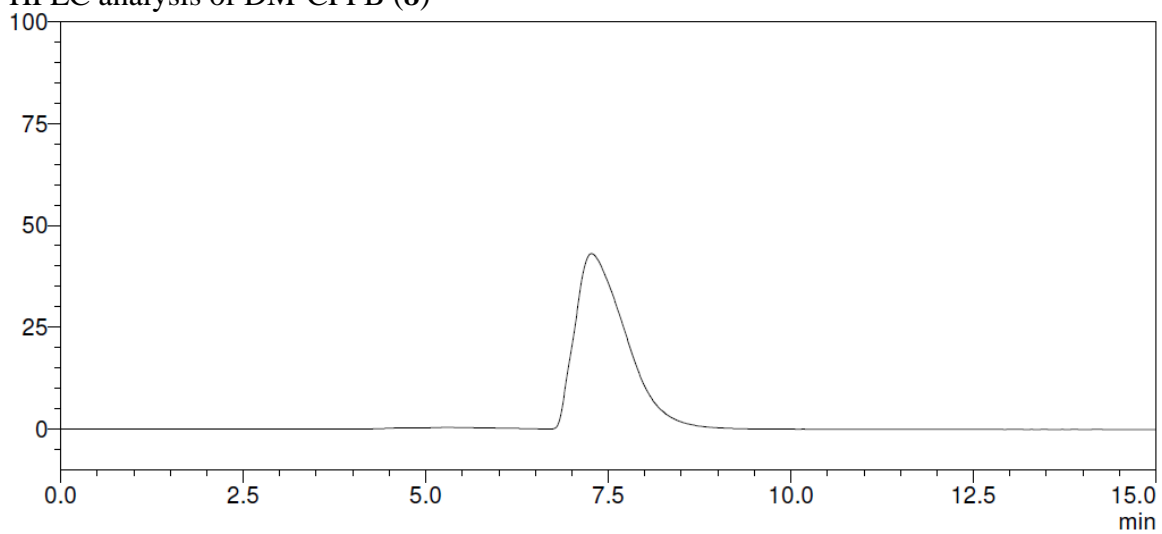

Area % purity: 97.6%

Conditions:

column: Kinetex® (C18, 5  $\mu\text{m}$ , 100  $\text{\AA}$ , 250 x 4.60 mm), solvents: 30:70 MeOH:H<sub>2</sub>O, flow rate: 1.0 mL/min, UV: 254 nm

### HPLC analysis of CPPA (9)

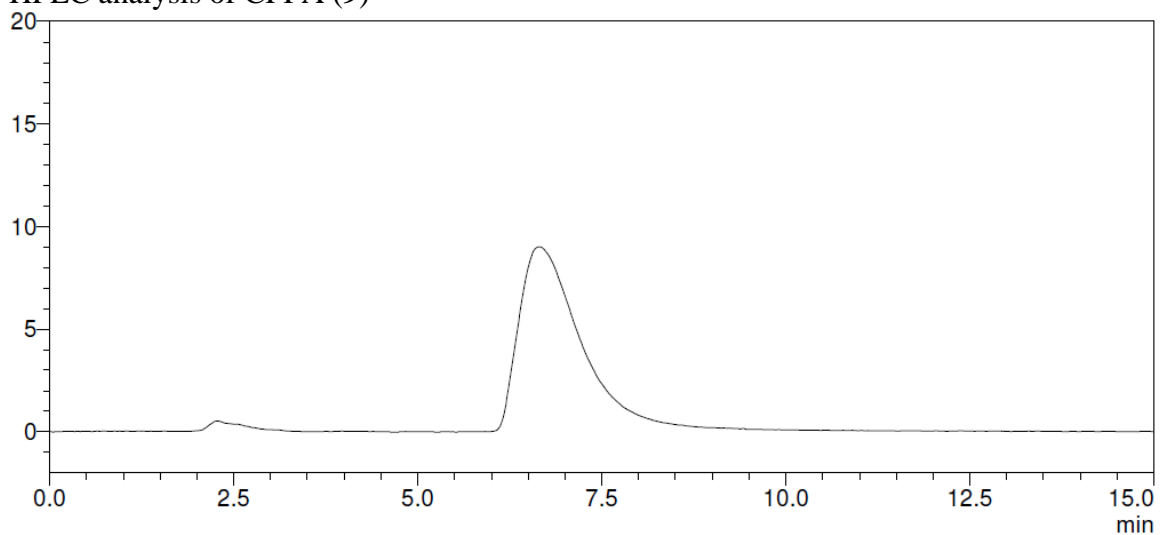

Area % purity: 96.0%

Conditions:

column: Kinetex® (C18, 5  $\mu\text{m}$ , 100  $\text{\AA}$ , 250 x 4.60 mm), solvents: 30:70 MeOH:H<sub>2</sub>O, flow rate: 1.0 mL/min, UV: 254 nm

### HPLC analysis of I-CPPA (10)

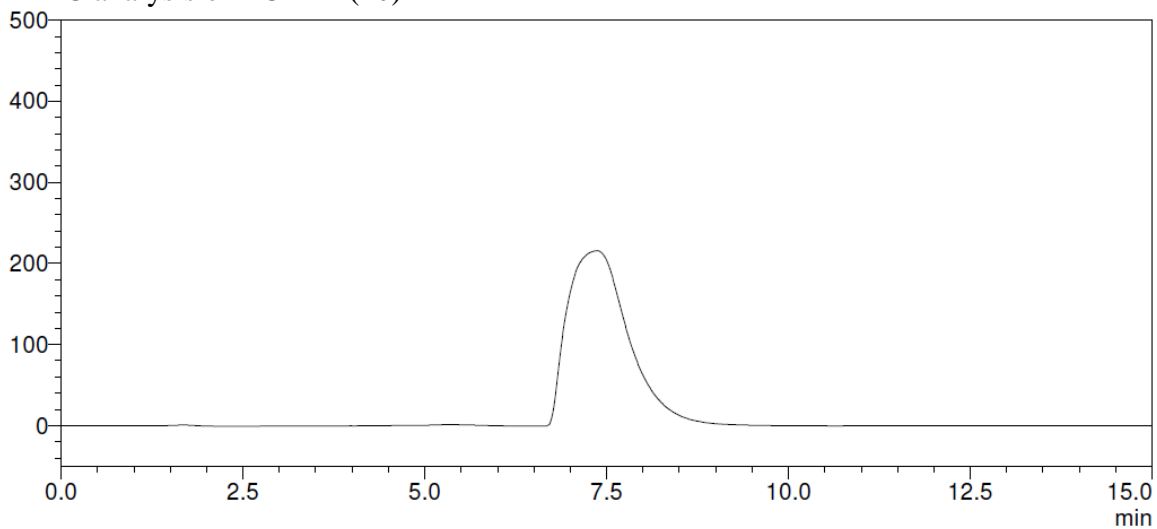

Area % purity: 97.9%

Conditions:

column: Kinetex® (C18, 5  $\mu\text{m}$ , 100  $\text{\AA}$ , 250 x 4.60 mm), solvents: 30:70 MeOH:H<sub>2</sub>O, flow rate: 1.0 mL/min, UV: 254 nm

### HPLC analysis of A500359F

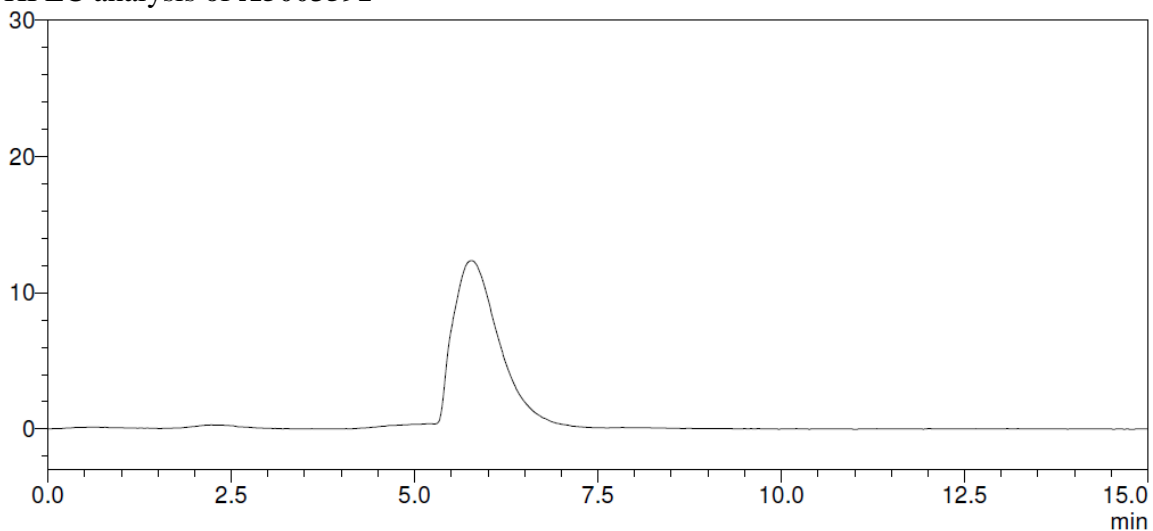

Area % purity: 95.5%

Conditions:

column: Kinetex® (C18, 5  $\mu\text{m}$ , 100  $\text{\AA}$ , 250 x 4.60 mm), solvents: 30:70 MeOH:H<sub>2</sub>O, flow rate: 1.0 mL/min, UV: 254 nm

### Synthesis of CPPB (5) from A500359F

To a stirred solution of **A-500359F** (11 mg, 0.024 mmol), **34** (26 mg, 0.072 mmol), Glyceroacetone-Oxyma (16 mg, 0.072 mmol) and NMM (26 mL, 0.24 mmol) in DMF (0.49 mL) was added EDCI (23 mg, 0.12 mmol). After being stirred for 5h at r.t., the reaction mixture was filtered, and diluted with water. The product was extracted with CHCl<sub>3</sub>/MeOH (9/1). The combined extracts were derived over Na<sub>2</sub>SO<sub>4</sub>, and concentrated *in vacuo*. The crude mixture was purified by DOWEX 50Wx4 (MeOH : NH<sub>4</sub>OH = 4 : 1) followed by reverse-phase HPLC [column: Luna (C<sub>18</sub>, 10 mm, 100 Å, 250 x 10 mm), solvents: 65:35 MeOH : H<sub>2</sub>O, flow rate: 3.0 mL/min, UV: 254 nm, retention time: 18 min] to afford **5** (17 mg, 92%): <sup>1</sup>H NMR (400 MHz, Methanol-*d*<sub>4</sub>) δ 7.86 (d, *J* = 8.1 Hz, 1H), 7.20 (dd, *J* = 10.9, 8.6 Hz, 4H), 7.02 (d, *J* = 9.1 Hz, 2H), 6.97 (d, *J* = 8.7 Hz, 2H), 5.98 (dd, *J* = 3.3, 1.0 Hz, 1H), 5.80 (d, *J* = 4.4 Hz, 1H), 5.76 (d, *J* = 8.2 Hz, 1H), 5.21 (d, *J* = 4.6 Hz, 1H), 4.68 (d, *J* = 2.0 Hz, 1H), 4.54 (dp, *J* = 7.3, 3.6 Hz, 1H), 4.48 (dd, *J* = 5.2, 2.0 Hz, 1H), 4.44 (d, *J* = 14.5 Hz, 1H), 4.39 (t, *J* = 3.9 Hz, 1H), 4.33 (d, *J* = 14.6 Hz, 1H), 4.20 (t, *J* = 4.7 Hz, 1H), 4.06 – 4.03 (m, 1H), 3.66 (t, *J* = 5.1 Hz, 1H), 3.51 – 3.45 (m, 3H), 3.19 (s, 3H), 3.08 (ddd, *J* = 12.3, 8.6, 3.4 Hz, 3H), 2.14 – 2.08 (m, 2H), 1.86 (dtd, *J* = 12.2, 8.3, 3.5 Hz, 3H); <sup>13</sup>C NMR (101 MHz, MeOD) δ 173.68, 166.16, 163.31, 157.62, 152.18, 152.08, 144.15, 141.83, 130.91, 129.76 (2C), 123.58 (2C), 118.03 (4C), 109.58, 102.74, 100.64, 90.83, 83.32, 80.35, 77.51, 74.27, 74.01, 67.61, 63.48, 58.61, 48.20 (2C), 43.51, 31.47 (2C); HRMS (ESI+) *m/z* calcd for C<sub>36</sub>H<sub>41</sub>F<sub>3</sub>N<sub>5</sub>O<sub>13</sub> [M + H] 808.2653, found 808.2674.

### HPLC analysis of CPPB (5) synthesized from A500359F

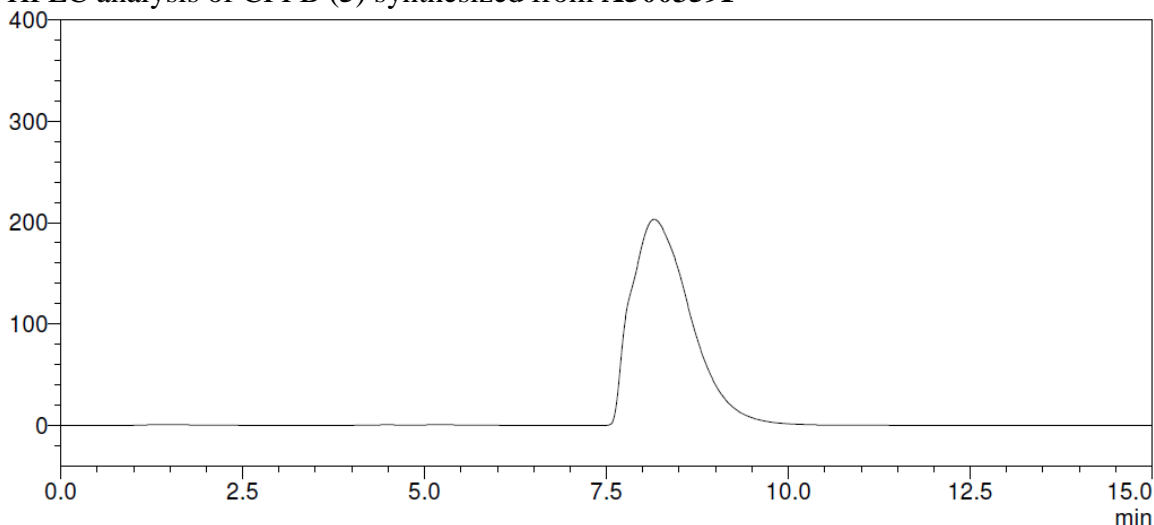

Area % purity: 98.3%

Conditions:

column: Kinetex® (C<sub>18</sub>, 5 μm, 100 Å, 250 x 4.60 mm), solvents: 30:70 MeOH:H<sub>2</sub>O, flow rate: 1.0 mL/min, UV: 254 nm

## Bacterial strains and growth of bacteria

*Mycobacterium smegmatis* (ATCC 607) and *E. coli* (ATCC 10798) were obtained from American Type Culture Collection (ATCC). *Mycobacterium avium* 2285, *Myobacterium kansasii* 824, *Mycobacterium abscessus* DJO-44273, and *Mycobacterium tuberculosis* H37Rv were acquired from EBI. A single colony of *Mycobacterium spp.* was obtained on Difco Middlebrook 7H10 nutrient agar enriched with albumin, dextrose, and catalase (ADC). The others were obtained on the recommended agar media. A single colony of *E. coli* were grown on tryptic soy agar for 24h at 37°C in a static incubator and cultured in tryptic soy broth until log phase to be an optical density (OD) of 0.2-0.5. The OD was monitored at 600 and 570 nm using a 96-well microplate reader.

## MIC assays

Minimum inhibitory concentrations were determined by broth dilution microplate alamar blue assay or by OD measurement. All compounds were stored in DMSO or water (1 mg/100  $\mu$ L concentration). This concentration was used as the stock solution for all MIC studies. Each compound from stock solution was placed in the first well of a sterile 96 well plate and a serial dilution was conducted with the culturing broth (total volume of 10  $\mu$ L). The bacterial suspension at log phase (190  $\mu$ L) was added to each well (total volume of 200  $\mu$ L), and was incubated for 24h at 37 °C. 20  $\mu$ L of resazurin (0.02%) was added to each well and incubated for 4h for *Mycobacterium spp.* (National Committee for Clinical Laboratory Standards (NCCLS) method (pink = growth, blue = no visible growth)). The OD measurements were performed for all experiments prior to colorimetric. The MIC values were determined according to the colorimetric assays using resazurin. The absorbance of each well was also measured at 570 and 600 nm via UV-Vis.

## MraY assays

MraY assay substrates, Park's nucleotide-*N*<sup>E</sup>-C<sub>6</sub>-dansylthiourea and neryl phosphate, were chemically synthesized according to the reported procedures.<sup>3</sup>

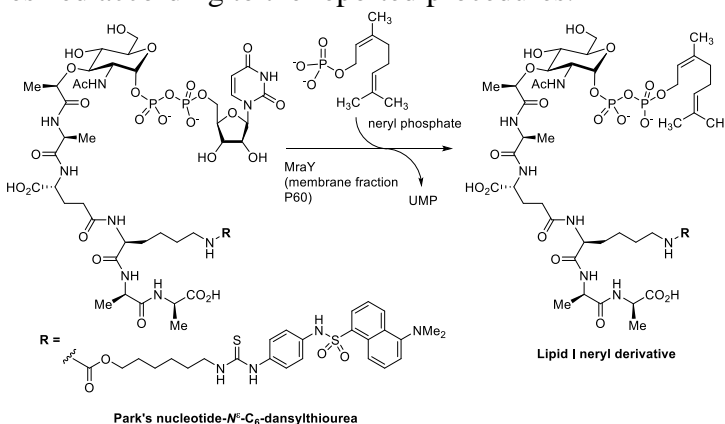

Park's nucleotide-*N*<sup>E</sup>-C<sub>6</sub>-dansylthiourea (2 mM stock solution, 1.88  $\mu$ L), MgCl<sub>2</sub> (0.5 M, 5  $\mu$ L), KCl (2 M, 5  $\mu$ L), Triton X100 (0.5%, 5.63  $\mu$ L), Tris-HCl buffer (pH 8.0, 50 mM), neryl phosphate (0.1 M, 2.25  $\mu$ L), and inhibitor molecule (0 - 50  $\mu$ g/mL in Tris-HCl buffer)



were placed in a 1.5 mL Eppendorf tube. To a stirred reaction mixture, P-60 (10 $\mu$ L) was added (total volume of reaction mixture: 50  $\mu$ L adjust with Tris-HCl buffer). The reaction mixture was incubated for 2h at room temperature (26  $^{\circ}$ C) and quenched with CHCl<sub>3</sub> (100 $\mu$ L). Two phases were mixed via vortex and centrifuged at 25,000 xg for 10min. The upper aqueous phase was assayed via reverse-phase HPLC. The water phase (10  $\mu$ L) was injected into HPLC (solvent: CH<sub>3</sub>CN/0.05 M aq. NH<sub>4</sub>HCO<sub>3</sub> = 25:75; UV: 350 nm; flow rate: 0.5 mL/min; column: Kinetex 5 $\mu$ m C8, 100 A, 150 x 4.60 mm), and the area of the peak for lipid I-neryl derivative was quantified to obtain the IC<sub>50</sub> value. The IC<sub>50</sub> values were calculated from plots of the percentage product inhibition versus the inhibitor.

### WecA assays

WecA assay substrate, UDP-Glucosamine-C6-FITC was chemically synthesized according to the reported procedures.<sup>4</sup>

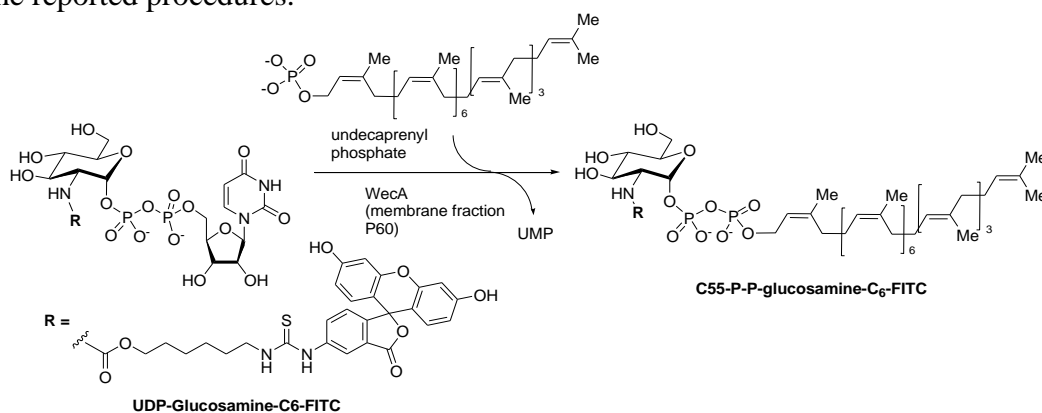

UDP-Glucosamine-C6-FITC (2 mM stock solution, 0.56  $\mu$ L), MgCl<sub>2</sub> (0.5 M, 4  $\mu$ L),  $\beta$ -mercaptoethanol (50 mM, 5  $\mu$ L), CHAPS (5%, 11.25  $\mu$ L), Tris-HCl buffer (pH 8.0, 50 mM), undecaprenyl phosphate (4 mM, 1.4  $\mu$ L), and inhibitor molecule (0 - 50  $\mu$ g/mL in Tris-HCl buffer) were placed in a 1.5  $\mu$ L Eppendorf tube. To a stirred reaction mixture, P-60 (10  $\mu$ L) was added (total volume of reaction mixture: 50  $\mu$ L adjust with Tris-HCl buffer). The reaction mixture was incubated for 2h at 37  $^{\circ}$ C and quenched with n-butanol (150  $\mu$ L). Two phases were mixed via vortex and centrifuged at 10,000 xg for 3min. The upper organic phase was assayed via reverse-phase HPLC. The organic phase (30  $\mu$ L) was injected into HPLC (solvent: gradient elution of 85:15 to 95:5 MeOH/0.05 M aq. NH<sub>4</sub>HCO<sub>3</sub> over 20min; UV: 485 nm; flow rate: 0.5 ml/ min; column: Kinetex 5  $\mu$ m C8, 100  $\text{\AA}$ , 150 x 4.60 mm), and the area of the peak for C55-P-P-glucosamine-C6-FITC was quantified to obtain the IC<sub>50</sub> value. The IC<sub>50</sub> values were calculated from plots of the percentage product inhibition versus the inhibitor concentration.

### AgIH assays

AgIH assays were performed as the procedure described for WecA assays, but used *Mj*AgIH and  $\alpha$ -dihydroundecaprenyl phosphate (C<sub>55</sub>-dolichyl phosphate) instead of WecA and undecaprenyl phosphate.<sup>5</sup>

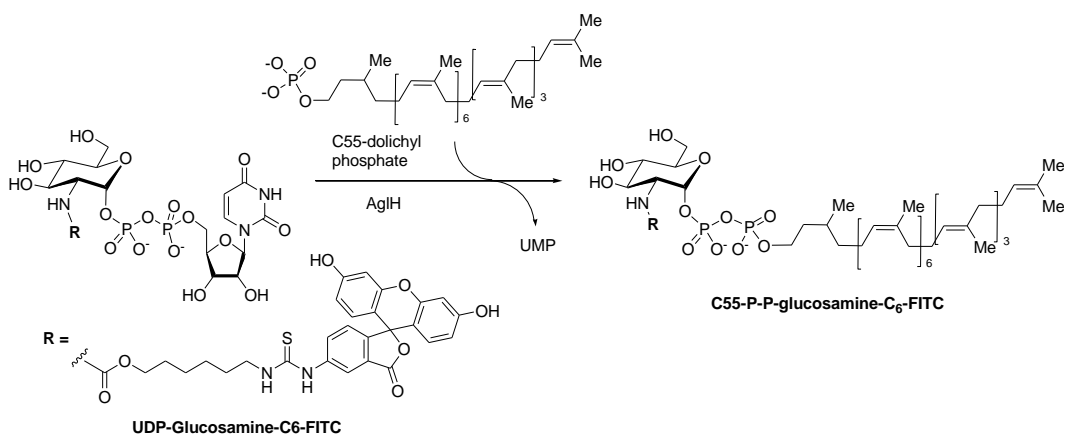

UDP-Glucosamine-C6-FITC (2 mM stock solution, 0.56  $\mu\text{L}$ ),  $\text{MgCl}_2$  (0.5 M, 4  $\mu\text{L}$ ),  $\beta$ -mercaptoethanol (50 mM, 5  $\mu\text{L}$ ), CHAPS (5%, 11.25  $\mu\text{L}$ ), Tris-HCl buffer (pH 8.0, 50 mM), C55-dolichyl phosphate (4 mM, 1.4  $\mu\text{L}$ ), and inhibitor molecule (0 - 50  $\mu\text{g}/\text{mL}$  in Tris-HCl buffer) were placed in a 1.5 mL Eppendorf tube. To a stirred reaction mixture, AgIH solution (10  $\mu\text{L}$ ) was added (total volume of reaction mixture: 50  $\mu\text{L}$  adjust with Tris-HCl buffer). The reaction mixture was incubated for 2h at 37  $^\circ\text{C}$  and quenched with n-butanol (150  $\mu\text{L}$ ). Two phases were mixed via vortex and centrifuged at 10,000  $\times g$  for 3min. The upper organic phase was assayed via reverse-phase HPLC. The organic phase (30  $\mu\text{L}$ ) was injected into HPLC (solvent: gradient elution of 85:15 to 95:5 MeOH/0.05 M aq.  $\text{NH}_4\text{HCO}_3$  over 20min; UV: 485 nm; flow rate: 0.5 ml/ min; column: Kinetex 5  $\mu\text{m}$  C8, 100  $\text{\AA}$ , 150 x 4.60 mm), and the area of the peak for C55-P-P-glucosamine-C6-FITC was quantified to obtain the  $\text{IC}_{50}$  value. The  $\text{IC}_{50}$  values were calculated from plots of the percentage product inhibition versus the inhibitor concentration.

### DPAGT1 assays

DPAGT1 assays were performed as the procedure described for AgIH assays, but used DPAGT1.<sup>6</sup>

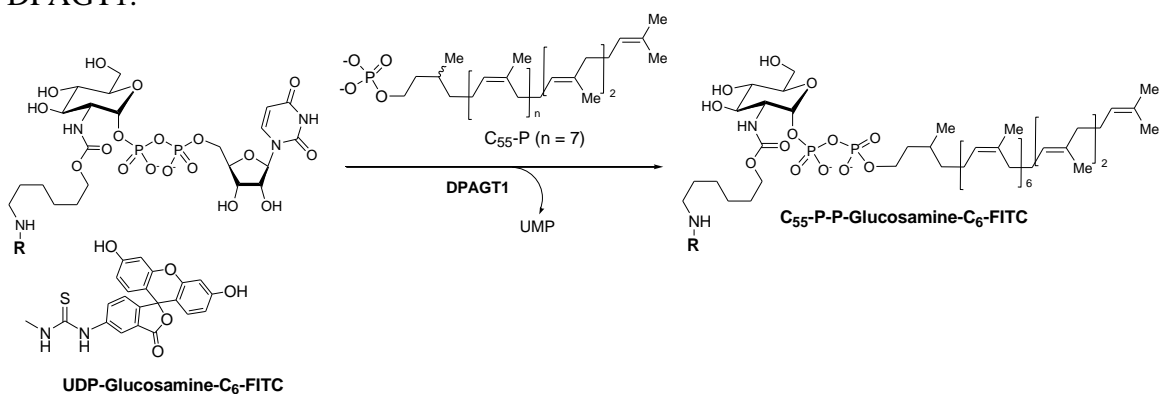

UDP-Glucosamine-C6-FITC (2 mM stock solution, 0.56  $\mu\text{L}$ ),  $\text{MgCl}_2$  (0.5 M, 4  $\mu\text{L}$ ),  $\beta$ -mercaptoethanol (50 mM, 5  $\mu\text{L}$ ), CHAPS (20%, 2.5  $\mu\text{L}$ ), Tris-HCl buffer (pH 8.0, 50 mM), C55-dolichyl phosphate (4 mM, 1.68  $\mu\text{L}$ ), and inhibitor molecule (0 - 50  $\mu\text{g}/\text{mL}$  in Tris-HCl buffer) were placed in a 1.5 mL Eppendorf tube. To a stirred reaction mixture, DPAGT1 solution (10  $\mu\text{L}$ ) was added (total volume of reaction mixture: 50  $\mu\text{L}$  adjust with Tris-HCl

buffer). The reaction mixture was incubated for 2h at 37 °C and quenched with n-butanol (150  $\mu$ L). Two phases were mixed via vortex and centrifuged at 10,000 xg for 3min. The upper organic phase was assayed via reverse-phase HPLC. The organic phase (30  $\mu$ L) was injected into HPLC (solvent: gradient elution of 85:15 to 95:5 MeOH/0.05 M aq.  $\text{NH}_4\text{HCO}_3$  over 20min.; UV: 485 nm; flow rate: 0.5 mL/ min; column: Kinetex 5  $\mu$ m C8, 100  $\text{\AA}$ , 150 x 4.60 mm), and the area of the peak for C<sub>55</sub>-P-P-glucosamine-C<sub>6</sub>-FITC was quantified to obtain the IC<sub>50</sub> value. The IC<sub>50</sub> values were calculated from plots of the percentage product inhibition versus the inhibitor concentration.

### **Scratch assay**

A confluent monolayer was formed in 24-well plates. The monolayer was scratched by a sterile 200  $\mu$ L pipette tip and washed with PBS to remove cell debris. Complete medium with CPPB (**5**) (0, 0.05, 0.1, 0.2  $\mu$ M) were added and scratched areas were photographed with microscope. The scratched cells were incubated at 37 °C, 5% CO<sub>2</sub>. After 24h, medium was removed and cells were stained with a 1:1 mixture of crystal violet and PBS for 5min, washed with PBS twice, and photographed with microscope. Wound areas were measured and recovered areas were calculated.

**Figure S1A.** Analysis of migration inhibition of PANC-1.

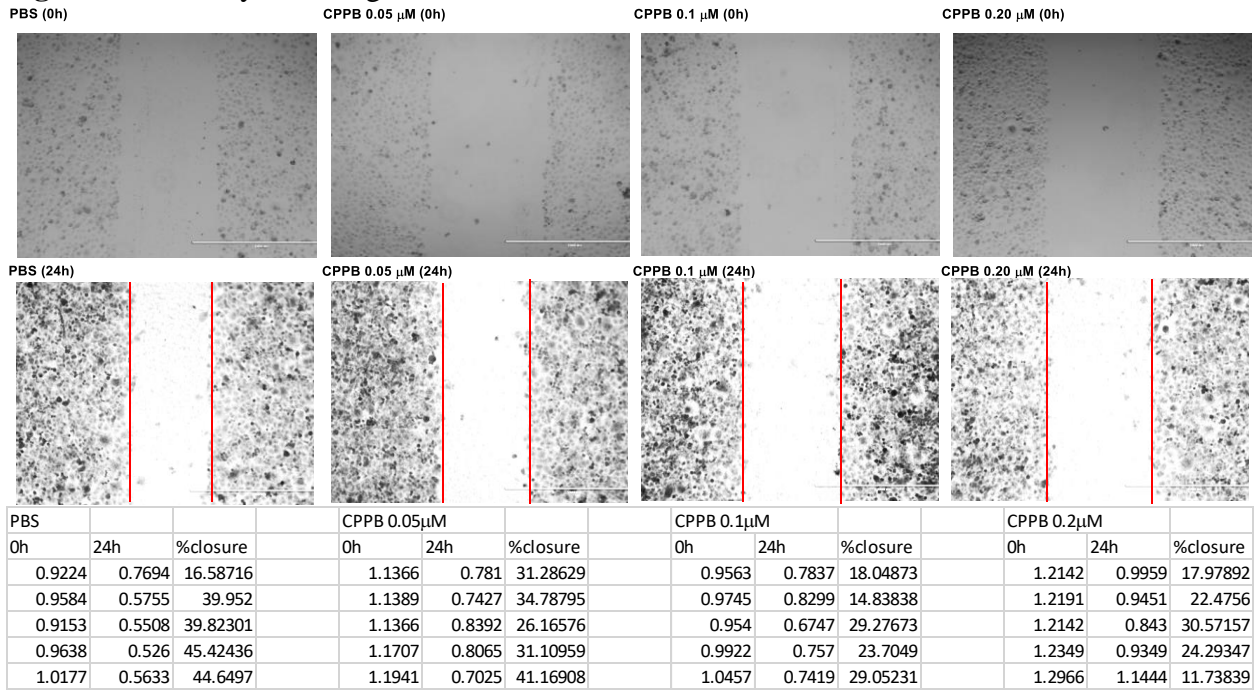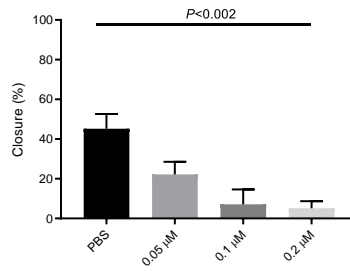

**Figure S1B.** Analysis of migration inhibition of PD002.

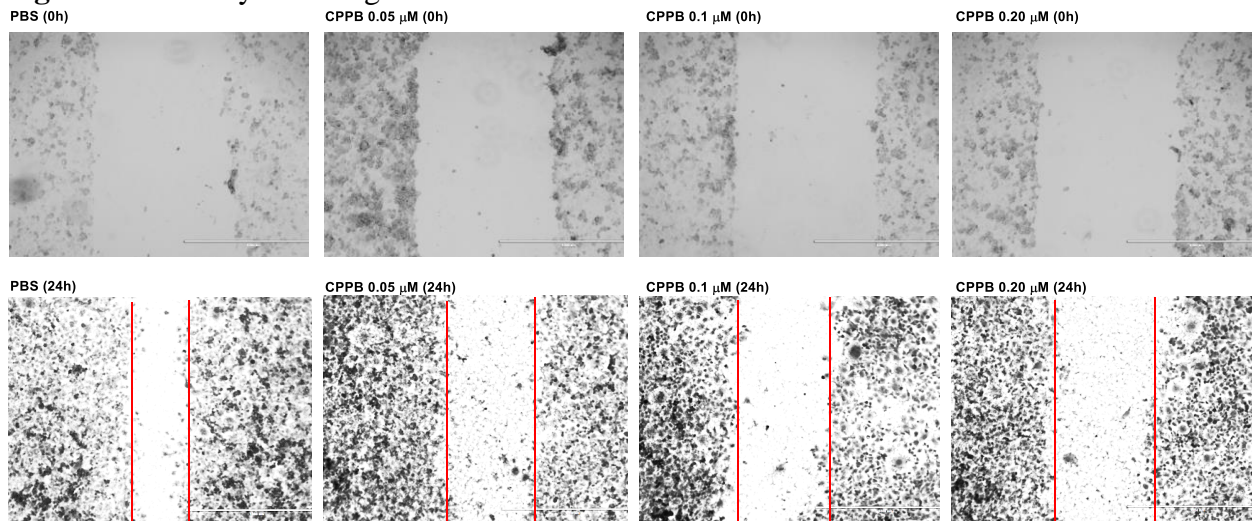

| PBS    |        |          | CPPB 0.05 $\mu$ M |        |          | CPPB 0.1 $\mu$ M |        |          | CPPB 0.2 $\mu$ M |        |          |
|--------|--------|----------|-------------------|--------|----------|------------------|--------|----------|------------------|--------|----------|
| 0h     | 24h    | %closure | 0h                | 24h    | %closure | 0h               | 24h    | %closure | 0h               | 24h    | %closure |
| 1.2905 | 0.5376 | 58.34173 | 1.1679            | 0.5325 | 54.40534 | 1.1459           | 0.8198 | 28.45798 | 0.9814           | 0.7852 | 19.99185 |
| 1.3473 | 0.4855 | 63.96497 | 1.1119            | 0.6251 | 43.78092 | 1.1814           | 0.701  | 40.66362 | 1.0246           | 0.7978 | 22.13547 |
| 1.3473 | 0.518  | 61.55274 | 1.2686            | 0.732  | 42.2986  | 1.2192           | 0.7472 | 38.71391 | 1.0021           | 0.8409 | 16.08622 |
| 1.3419 | 0.3756 | 72.00984 | 1.2839            | 0.6888 | 46.35096 | 1.2497           | 0.5462 | 56.29351 | 1.1403           | 0.925  | 18.881   |
| 1.3137 | 0.4698 | 64.23841 | 1.2864            | 0.7164 | 44.3097  | 1.2209           | 0.6014 | 50.74126 | 1.0993           | 0.9277 | 15.60993 |

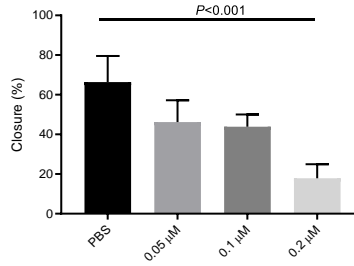

**Figure S1C.** Comparisons of migration inhibition of PD002 by treatment with CPPB, gemcitabine, and tunicamycin in wound healing (scratch) assays.<sup>a</sup>

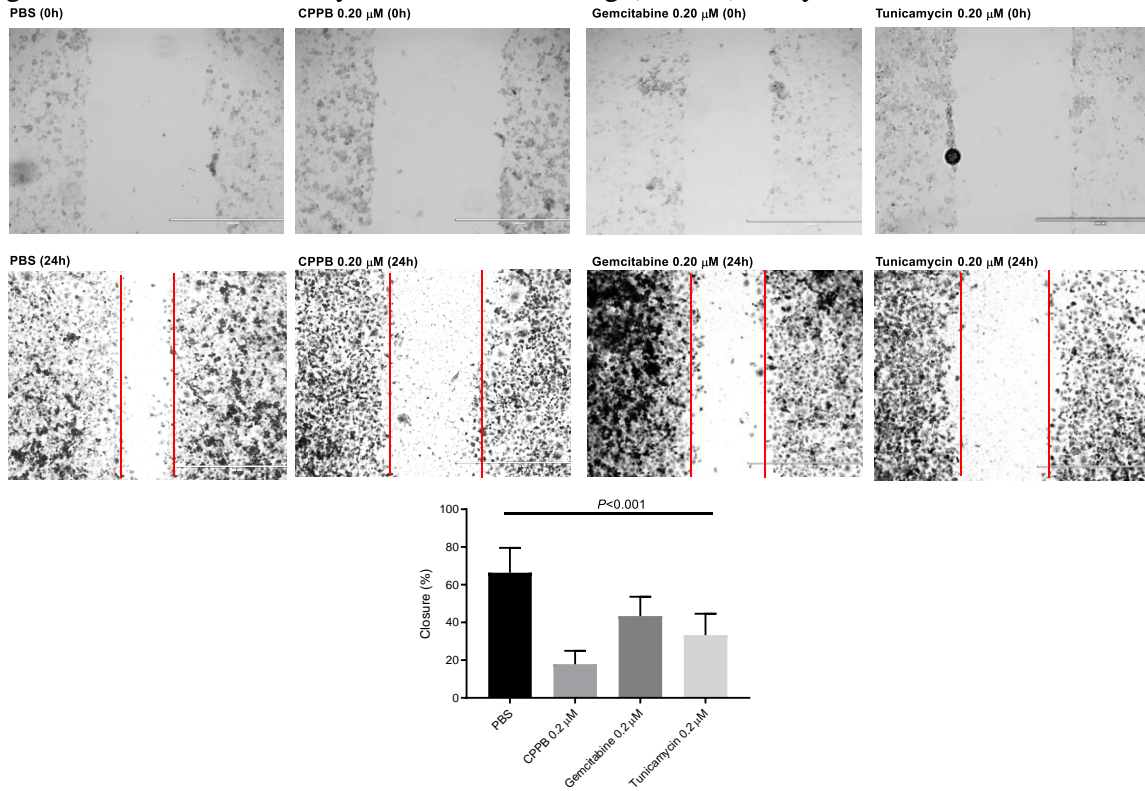

<sup>a</sup>All images were acquired at 24h.

**Figure S1D.** Analysis of migration inhibition of AsPC-1.

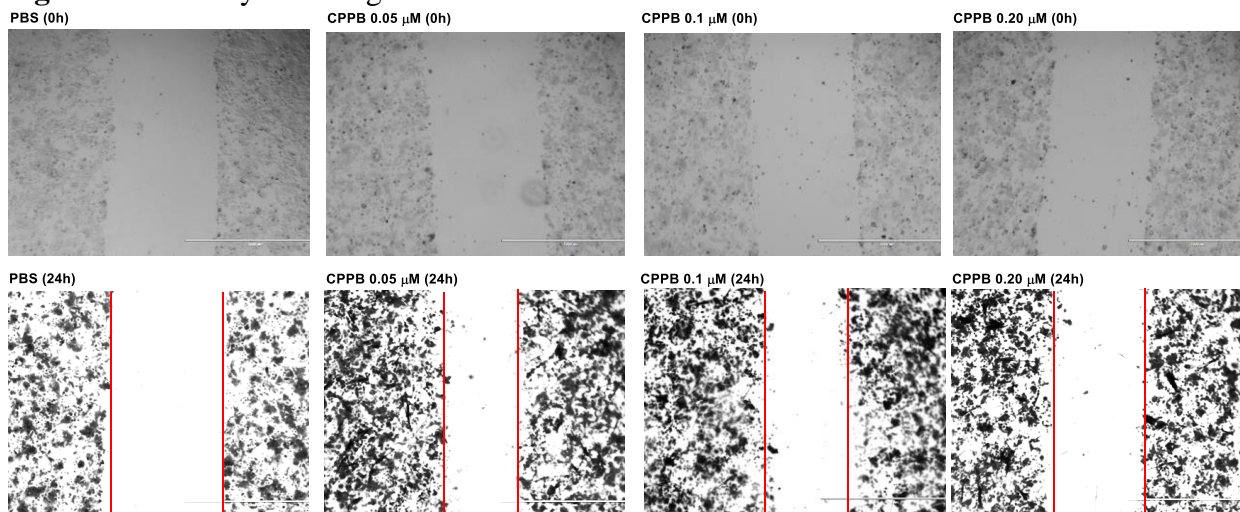

| PBS    |        |          | CPPB 0.05 $\mu$ M |        |          | CPPB 0.1 $\mu$ M |        |          | CPPB 0.2 $\mu$ M |        |          |
|--------|--------|----------|-------------------|--------|----------|------------------|--------|----------|------------------|--------|----------|
| 0h     | 24h    | %closure | 0h                | 24h    | %closure | 0h               | 24h    | %closure | 0h               | 24h    | %closure |
| 1.1202 | 0.6497 | 42.00143 | 1.2056            | 0.9621 | 20.19741 | 1                | 0.829  | 17.1     | 0.888            | 0.8117 | 8.592342 |
| 1.1896 | 0.7482 | 37.10491 | 1.3113            | 1.0346 | 21.1012  | 1.0014           | 0.7941 | 20.70102 | 0.9326           | 0.8244 | 11.60197 |
| 1.0831 | 0.6704 | 38.10359 | 1.2664            | 0.9878 | 21.99937 | 0.9258           | 0.7222 | 21.99179 | 0.9316           | 0.862  | 7.471018 |
| 1.0242 | 0.6073 | 40.70494 | 1.2446            | 1.0044 | 19.29937 | 0.915            | 0.7192 | 21.39891 | 0.9041           | 0.7884 | 12.79726 |
| 1.0173 | 0.6653 | 34.6014  | 1.2625            | 1.0125 | 19.80198 | 0.927            | 0.7472 | 19.3959  | 0.9453           | 0.8555 | 9.49963  |
| 1.0616 | 0.5881 | 44.60249 | 1.3183            | 1.0091 | 23.45445 | 0.934            | 0.7341 | 21.40257 | 0.9924           | 0.8733 | 12.00121 |
| 1.0263 | 0.6209 | 39.50112 | 1.3182            | 1.069  | 18.90457 | 0.9441           | 0.8015 | 15.10433 | 1.0165           | 0.8904 | 12.40531 |
| 1.0524 | 0.5757 | 45.29647 | 1.3117            | 1.01   | 23.00069 | 1.0182           | 0.8634 | 15.2033  | 1.1768           | 1.0898 | 7.39293  |
| 1.0346 | 0.5628 | 45.60217 | 1.3507            | 1.0049 | 25.60154 | 1.0171           | 0.8615 | 15.2984  | 1.2718           | 1.1357 | 10.70137 |
| 1.0952 | 0.5958 | 45.59898 | 1.3037            | 1.0104 | 22.49751 | 1.0114           | 0.8708 | 13.90152 | 1.2231           | 1.1201 | 8.421225 |
| 1.124  | 0.607  | 45.99644 | 1.3529            | 1.0188 | 24.6951  | 1.1283           | 0.9263 | 17.90304 | 1.2291           | 1.0878 | 11.49622 |
| 1.101  | 0.643  | 41.59855 | 1.3416            | 1.0961 | 18.29905 | 0.8307           | 0.6837 | 17.69592 | 1.3053           | 1.1644 | 10.79445 |
| 1.1259 | 0.6463 | 42.59703 | 1.116             | 0.7946 | 28.79928 | 1.0105           | 0.8114 | 19.70312 | 1.3029           | 1.1719 | 10.05449 |
| 1.1103 | 0.6506 | 41.40322 | 1.0833            | 0.7789 | 28.09933 | 1.1237           | 0.9513 | 15.34217 | 1.3615           | 1.2159 | 10.69409 |
| 1.1471 | 0.6814 | 40.59803 | 1.0811            | 0.7794 | 27.90676 | 1.1739           | 1.0095 | 14.0046  | 1.3911           | 1.2812 | 7.900223 |
| 1.1523 | 0.6211 | 46.09911 | 1.071             | 0.8214 | 23.30532 | 1.1236           | 0.945  | 15.89534 | 1.4017           | 1.2909 | 7.904687 |
| 1.1546 | 0.6374 | 44.79473 | 1.1878            | 0.8754 | 26.30072 | 1.2464           | 1.0258 | 17.69897 |                  |        |          |
| 1.0963 | 0.6063 | 44.69579 | 1.1048            | 0.9291 | 15.90333 | 1.214            | 1.0222 | 15.79901 |                  |        |          |
| 1.2443 | 0.698  | 43.9042  | 1.2355            | 1.0057 | 18.59976 | 1.2645           | 1.0267 | 18.80585 |                  |        |          |
| 1.2544 | 0.7476 | 40.40179 | 1.229             | 0.9623 | 21.70057 | 1.2654           | 1.0693 | 15.49708 |                  |        |          |
| 1.2672 | 0.74   | 41.60354 | 1.2291            | 1.0091 | 17.89928 | 1.3561           | 1.1255 | 17.00465 |                  |        |          |
| 1.2899 | 0.8023 | 37.80138 |                   |        |          | 1.3803           | 1.1332 | 17.90191 |                  |        |          |
| 1.3807 | 0.8008 | 42.00043 |                   |        |          | 1.4222           | 1.1491 | 19.20264 |                  |        |          |
| 1.39   | 0.8762 | 36.96403 |                   |        |          |                  |        |          |                  |        |          |
| 1.1324 | 0.6896 | 39.10279 |                   |        |          |                  |        |          |                  |        |          |
| 1.0863 | 0.6083 | 44.00258 |                   |        |          |                  |        |          |                  |        |          |
| 1.0895 | 0.6886 | 36.7967  |                   |        |          |                  |        |          |                  |        |          |
| 1.1169 | 0.7271 | 34.90017 |                   |        |          |                  |        |          |                  |        |          |
| 1.1561 | 0.6694 | 42.09843 |                   |        |          |                  |        |          |                  |        |          |
| 1.1433 | 0.7317 | 36.00105 |                   |        |          |                  |        |          |                  |        |          |
| 1.1657 | 0.6609 | 43.30445 |                   |        |          |                  |        |          |                  |        |          |
| 1.1609 | 0.6594 | 43.19924 |                   |        |          |                  |        |          |                  |        |          |
| 1.2023 | 0.6865 | 42.90111 |                   |        |          |                  |        |          |                  |        |          |
| 1.1897 | 0.671  | 43.59923 |                   |        |          |                  |        |          |                  |        |          |
| 1.2856 | 0.72   | 43.99502 |                   |        |          |                  |        |          |                  |        |          |
| 1.203  | 0.7014 | 41.69576 |                   |        |          |                  |        |          |                  |        |          |
| 1.2197 | 0.744  | 39.00139 |                   |        |          |                  |        |          |                  |        |          |
| 1.1852 | 0.6756 | 42.99696 |                   |        |          |                  |        |          |                  |        |          |
| 1.2289 | 0.7623 | 37.96892 |                   |        |          |                  |        |          |                  |        |          |
| 1.4237 | 0.8699 | 38.89864 |                   |        |          |                  |        |          |                  |        |          |

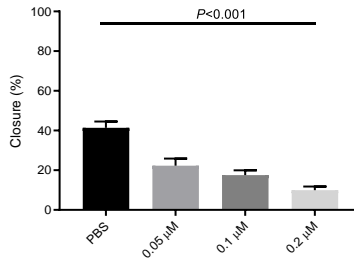

**Figure S1E.** Analysis of migration inhibition of Capan-1.

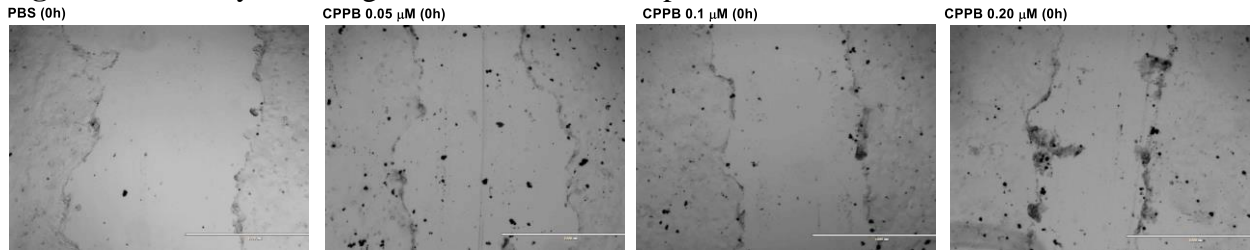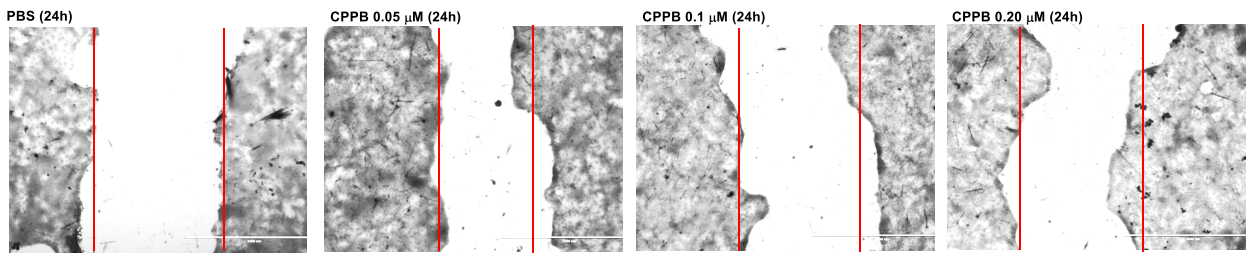

| PBS    |        |          | CPPB 0.05μM |        |          | CPPB 0.1μM |        |          | CPPB 0.2μM |        |          |
|--------|--------|----------|-------------|--------|----------|------------|--------|----------|------------|--------|----------|
| 0h     | 24h    | %closure | 0h          | 24h    | %closure | 0h         | 24h    | %closure | 0h         | 24h    | %closure |
| 1.4625 | 1.1071 | 24.30085 | 1.5753      | 1.2823 | 18.59963 | 1.9965     | 1.5094 | 24.3977  | 1.3607     | 1.1076 | 18.60072 |
| 1.1401 | 0.6954 | 39.00535 | 1.1492      | 0.9745 | 15.20188 | 1.4587     | 1.1611 | 20.40173 | 1.1822     | 1.1231 | 4.999154 |
| 1.2529 | 0.9008 | 28.1028  | 1.377       | 1.1498 | 16.49964 | 1.1065     | 0.8974 | 18.89742 | 1.0793     | 0.9595 | 11.09979 |
| 1.1594 | 0.6922 | 40.29671 | 1.2096      | 0.9459 | 21.8006  | 1.3102     | 1.0521 | 19.69928 | 1.2914     | 1.121  | 13.19498 |
| 1.236  | 0.8801 | 28.7945  | 1.4973      | 1.2308 | 17.7987  | 1.3016     | 0.9788 | 24.80025 | 1.1568     | 1.0829 | 6.388313 |
| 1.2417 | 0.8431 | 32.10115 | 1.397       | 1.1749 | 15.89835 | 1.4161     | 1.0706 | 24.39799 | 1.2403     | 1.1981 | 3.402403 |
| 1.6172 | 1.1191 | 30.80015 | 1.0924      | 0.8302 | 24.0022  | 1.4164     | 1.2053 | 14.90398 | 1.3245     | 1.261  | 4.794262 |
| 1.2064 | 0.8891 | 26.30139 | 1.7816      | 1.4556 | 18.29816 | 1.3186     | 1.0945 | 16.9953  | 1.1854     | 1.1101 | 6.352286 |
| 1.1487 | 0.8179 | 28.79777 | 1.6739      | 1.2755 | 23.8007  | 1.2036     | 0.9665 | 19.69924 | 1.208      | 1.1611 | 3.88245  |
| 1.1336 | 0.7402 | 34.7036  | 1.3164      | 1.0518 | 20.10027 | 1.3646     | 1.0426 | 23.59666 | 1.1683     | 1.1025 | 5.632115 |
| 1.0483 | 0.7548 | 27.99771 | 2.1668      | 1.7248 | 20.39874 | 1.2981     | 1.0826 | 16.60119 | 1.2234     | 1.1868 | 2.991663 |
| 1.2839 | 0.9346 | 27.20617 | 1.0901      | 0.8339 | 23.50243 | 1.2879     | 1.0007 | 22.29987 | 1.1968     | 1.1636 | 2.774064 |
| 1.1493 | 0.87   | 24.30175 | 1.7889      | 1.195  | 33.19917 | 1.1809     | 0.8609 | 27.09798 | 1.2673     | 1.2214 | 3.621873 |
| 1.6869 | 1.2568 | 25.49647 | 1.5153      | 1.2077 | 20.29961 | 1.5736     | 1.2951 | 17.69827 | 1.2416     | 1.1976 | 3.543814 |
| 1.7306 | 1.3672 | 20.9985  | 1.3192      | 1.0686 | 18.99636 | 1.3702     | 1.1455 | 16.39907 |            |        |          |
| 1.4137 | 1.0772 | 23.80279 |             |        |          | 1.3664     | 1.1587 | 15.20053 |            |        |          |
| 1.5953 | 1.1135 | 30.20122 |             |        |          |            |        |          |            |        |          |
| 1.3062 | 1.0319 | 20.99985 |             |        |          |            |        |          |            |        |          |
| 1.4962 | 1.1267 | 24.6959  |             |        |          |            |        |          |            |        |          |
| 1.7921 | 1.3781 | 23.10139 |             |        |          |            |        |          |            |        |          |
| 1.504  | 1.1551 | 23.19814 |             |        |          |            |        |          |            |        |          |
| 1.5016 | 1.0737 | 28.49627 |             |        |          |            |        |          |            |        |          |

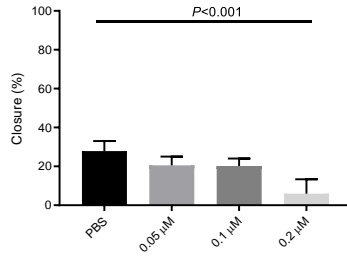

**Figure S1F.** Analysis of migration inhibition of SiHa.

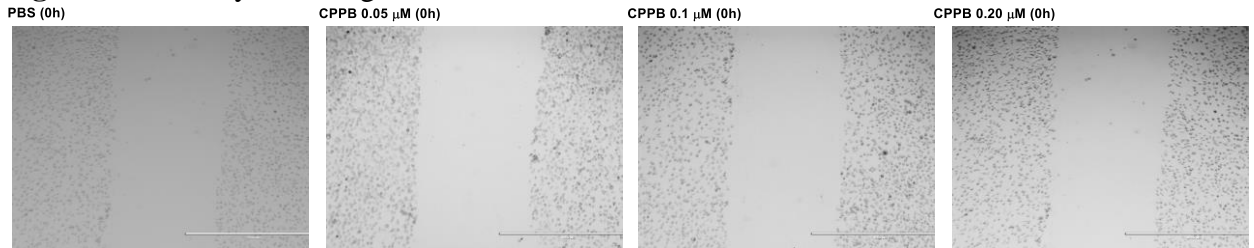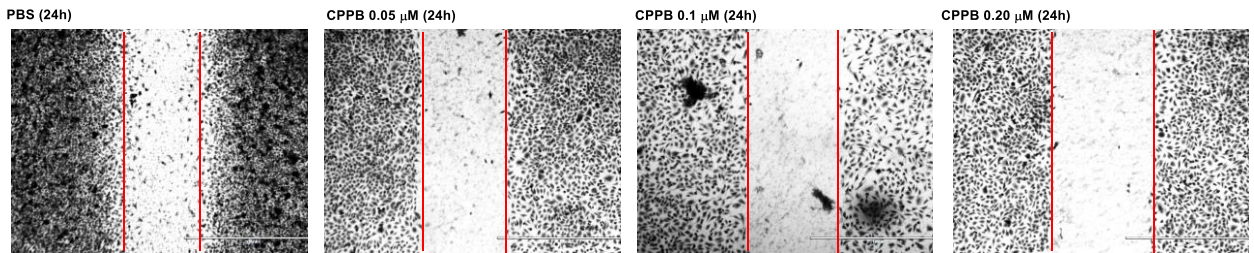

| PBS    |        |          | CPPB 0.05μM |        |          | CPPB 0.1μM |        |          | CPPB 0.2μM |        |          |
|--------|--------|----------|-------------|--------|----------|------------|--------|----------|------------|--------|----------|
| 0h     | 24h    | %closure | 0h          | 24h    | %closure | 0h         | 24h    | %closure | 0h         | 24h    | %closure |
| 1.131  | 0.5357 | 52.63484 | 1.0945      | 0.8928 | 18.42851 | 1.1284     | 1.0702 | 5.157745 | 1.1702     | 1.022  | 12.6645  |
| 1.1378 | 0.5703 | 49.87696 | 1.1537      | 0.8772 | 23.96637 | 1.1514     | 1.059  | 8.025013 | 1.1082     | 1.0271 | 7.318174 |
| 1.0545 | 0.5699 | 45.95543 | 1.0418      | 0.8544 | 17.9881  | 1.0314     | 0.9601 | 6.912934 | 1.0902     | 1.0167 | 6.741882 |
| 1.1266 | 0.7391 | 34.39553 | 1.1414      | 0.9128 | 20.02804 | 1.1026     | 1.0792 | 2.122256 | 1.1357     | 1.1045 | 2.747204 |
| 1.0655 | 0.6455 | 39.41811 | 1.0766      | 0.8946 | 16.90507 | 1.0691     | 0.9777 | 8.549247 | 1.0509     | 0.9995 | 4.891046 |
| 1.0253 | 0.5249 | 48.80523 | 1.0384      | 0.6963 | 32.94492 | 1.0201     | 0.8835 | 13.39084 | 1.0175     | 0.9995 | 1.769042 |

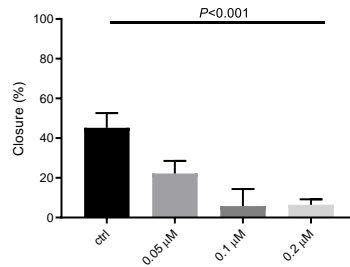



**Figure S1G.** Analysis of migration inhibition of HCT-116.

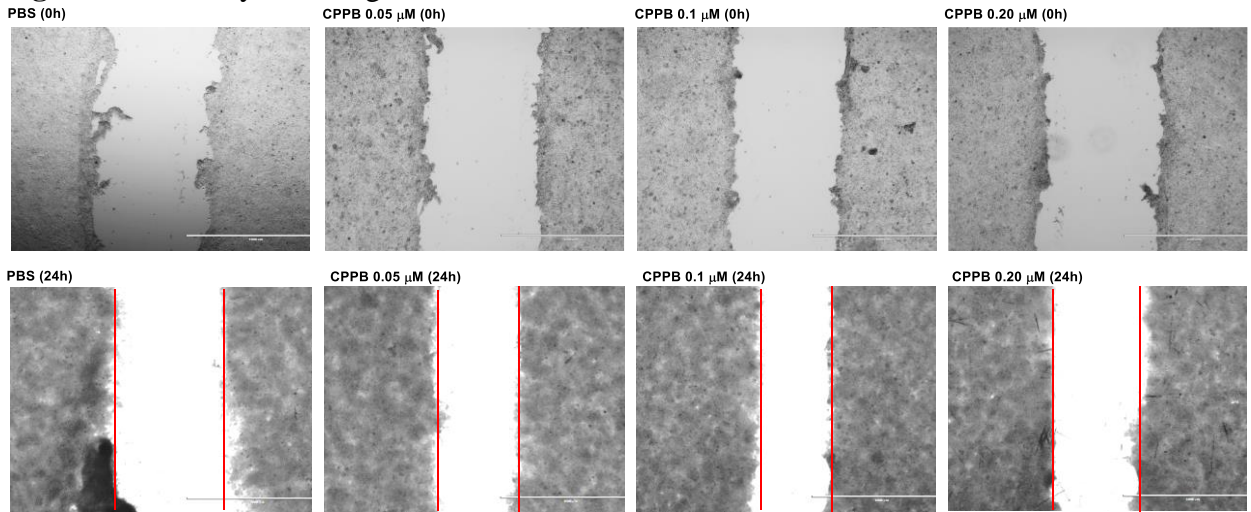

| PBS    |        |          | CPPB 0.05μM |        |          | CPPB 0.1μM |        |          | CPPB 0.2μM |        |          |
|--------|--------|----------|-------------|--------|----------|------------|--------|----------|------------|--------|----------|
| 0h     | 24h    | %closure | 0h          | 24h    | %closure | 0h         | 24h    | %closure | 0h         | 24h    | %closure |
| 1.5053 | 1.0603 | 29.56221 | 1.4222      | 0.9657 | 32.09816 | 2.0629     | 1.4358 | 30.39895 | 1.6537     | 1.1708 | 29.20119 |
| 1.6171 | 1.174  | 27.4009  | 1.4494      | 1.0711 | 26.10046 | 1.23       | 0.8721 | 29.09756 | 1.9951     | 1.4644 | 26.60017 |
| 1.7035 | 1.1152 | 34.53478 | 1.6431      | 1.1436 | 30.39985 | 1.3805     | 0.9401 | 31.90148 | 1.8349     | 1.3266 | 27.70178 |
| 1.6962 | 1.1195 | 33.99953 | 1.5439      | 1.1903 | 22.90304 | 1.5635     | 1.0256 | 34.40358 | 1.8247     | 1.3794 | 24.40401 |
| 2.2438 | 1.611  | 28.20216 | 1.7176      | 1.235  | 28.09735 | 1.5077     | 1.0584 | 29.80036 | 1.5477     | 1.3094 | 15.39704 |
| 1.59   | 1.1607 | 27       | 1.935       | 1.4261 | 26.29974 | 1.6479     | 1.2326 | 25.20177 | 1.4744     | 1.2296 | 16.60336 |
| 1.3777 | 0.9093 | 33.99869 | 1.4917      | 1.1217 | 24.80391 | 1.7368     | 1.1133 | 35.89936 | 1.4891     | 1.1793 | 20.80451 |
| 1.2339 | 0.8736 | 29.2001  | 1.5398      | 1.0147 | 34.10183 | 1.5942     | 1.1    | 30.99987 | 1.3503     | 1.1221 | 16.89995 |
| 1.2266 | 0.8549 | 30.30328 | 1.445       | 1.0751 | 25.59862 | 1.584      | 1.1389 | 28.09975 | 1.1726     | 1.0049 | 14.30155 |
| 1.4337 | 0.9692 | 32.39869 | 1.5986      | 1.1302 | 29.30064 | 1.7505     | 1.2656 | 27.70066 | 1.1176     | 0.8784 | 21.40301 |
| 1.7329 | 1.2078 | 30.30181 | 1.5009      | 0.9876 | 34.19948 | 1.9446     | 1.3126 | 32.50026 | 1.0392     | 0.7555 | 27.29985 |
| 1.1772 | 0.8582 | 27.0982  | 1.5985      | 1.1605 | 27.40069 | 2.3824     | 1.6438 | 31.00235 | 1.0788     | 0.8695 | 19.40119 |
|        |        |          | 1.8095      | 1.1327 | 37.4026  | 2.6203     | 1.9311 | 26.30233 | 1.1234     | 0.874  | 22.20046 |
|        |        |          | 2.0571      | 1.4811 | 28.00058 | 0.9566     | 0.6868 | 28.20406 | 1.0235     | 0.8597 | 16.00391 |
|        |        |          | 2.3298      | 1.7194 | 26.19967 | 0.9293     | 0.631  | 32.09943 | 0.9906     | 0.7836 | 20.89643 |
|        |        |          | 2.3297      | 1.7869 | 23.29914 | 1.0234     | 0.7123 | 30.39867 | 0.9532     | 0.7883 | 17.29962 |
|        |        |          | 1.9191      | 1.3856 | 27.79949 | 0.9431     | 0.6771 | 28.20486 |            |        |          |
|        |        |          | 1.8512      | 1.3347 | 27.90082 | 0.9551     | 0.6113 | 35.99623 |            |        |          |
|        |        |          | 1.8085      | 1.2822 | 29.10147 | 1.0398     | 0.6759 | 34.99711 |            |        |          |
|        |        |          | 1.8875      | 1.2986 | 31.2     |            |        |          |            |        |          |
|        |        |          | 1.0256      | 0.6584 | 35.80343 |            |        |          |            |        |          |
|        |        |          | 1.0867      | 0.7596 | 30.1003  |            |        |          |            |        |          |
|        |        |          | 1.0506      | 0.7564 | 28.00305 |            |        |          |            |        |          |
|        |        |          | 0.9818      | 0.7108 | 27.60236 |            |        |          |            |        |          |
|        |        |          | 1.1131      | 0.7302 | 34.39943 |            |        |          |            |        |          |
|        |        |          | 0.9354      | 0.6651 | 28.89673 |            |        |          |            |        |          |
|        |        |          | 1.0654      | 0.8129 | 23.70002 |            |        |          |            |        |          |
|        |        |          | 0.9039      | 0.6481 | 28.29959 |            |        |          |            |        |          |

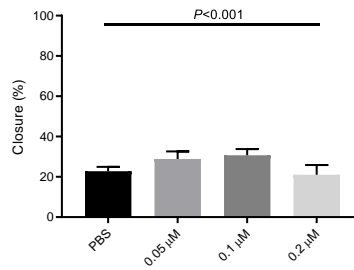

### Immunofluorescent staining

A confluent monolayer was formed in Nunc™ Lab-Tek™ II CC2™ chamber slide (8 well, Thermo Scientific, Cat. # 154941PK). Complete medium with CPPB (5, 0 - 20 μM) was added and incubated at 37 °C, 5% CO<sub>2</sub>. After 24h (for snail and E-cadherin, 72h for DPAGT1), medium was removed and cells were washed with PBS (3 times), then fixed with 4% paraformaldehyde in PBS for 30min at 4 °C. After washing with 0.2% Tween-20/PBS for 3 times, permeabilized with 0.25% Triton X100 in PBS for 30min at 4 °C. After washing with 0.2% Tween-20/PBS for 3 times, treated with blocking buffer (0.2% Tween-20, 1% NGS, 1% BSA in PBS) for 2h at 4 °C. Then the cells were treated with primary antibody (snail: Snail (C15D3) rabbit mAb (Cell Signaling Technology, Cat. # 3879S), E-cadherin: E-Cadherin (4A2) mouse mAb (Cell Signaling Technology, Cat. # 14472S), DPAGT1: DPAGT1 polyclonal antibody (Invitrogen, Cat. # PA5-72704)) in blocking buffer (0.4% v/v) for overnight at 4 °C. The cells were washed with 0.2% Tween-20/PBS (3 times) and treated with secondary antibody (for snail and DPAGT1: goat anti-rabbit IgG (H+L) cross-adsorbed secondary antibody, Alexa Fluor 568 (Invitrogen, Cat. # A11011), for E-cadherin: goat anti-mouse IgG (H+L) highly cross-adsorbed secondary antibody, Alexa Fluor Plus 647 (Invitrogen, Cat. # A32728)) in blocking buffer (0.2% v/v) for 2h at r.t. in the dark. After another 3-times washing with 0.2% Tween-20/PBS, the cells were treated with DAPI Fluoromount-G® (SouthernBiotech, Cat. # 0100-20) and covered with glass slide for fluorescence microscopy analysis.

**Figure S2.** Immunofluorescent staining: Effect of a DPAGT1 inhibitor, CPPB, on Snail in pancreatic cancer cells (AsPC-1 and Capan-1).<sup>a</sup>

#### A: Snail (AsPC-1)

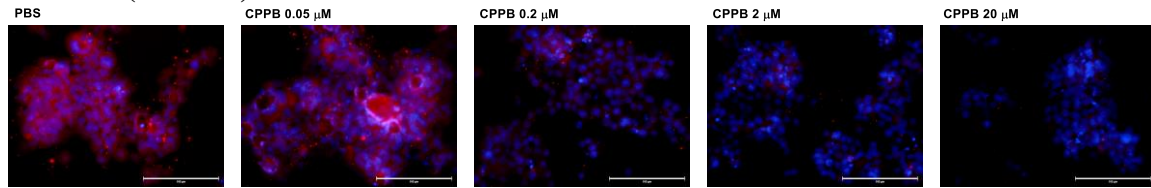

#### B: Snail (Capan-1)

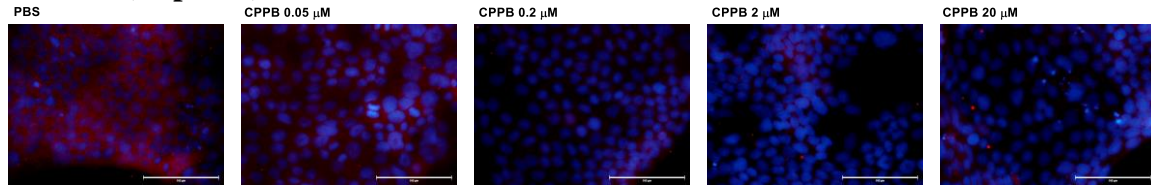

<sup>a</sup>Fluorescent microscopy images at 40x. The cells ( $1 \times 10^{5-6}$ ) were treated with CPPB (0.05, 0.2, 2.0, and 20 μM) or PBS for 24h. The cells were treated with Snail (C15D3) rabbit mAb (Cell Signaling Technology), followed by goat anti-rabbit IgG (H+L) cross-adsorbed secondary antibody, Alexa Fluor™ 568. DAPI (4',6-diamidino-2-phenylindole), a blue fluorescent DNA dye, was used to mark the nucleus.

**Figure S3.** Immunofluorescent staining: Effect of a DPAGT1 inhibitor, CPPB, on E-Cadherin in pancreatic cancer cells (AsPC-1 and Capan-1).<sup>a</sup>

**A: E-Cadherin (AsPC-1)**

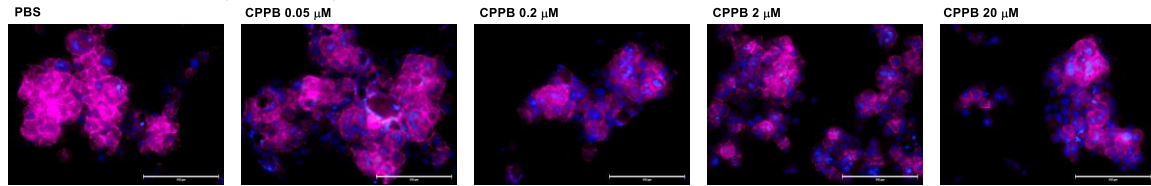

**B: E-Cadherin (Capan-1)**

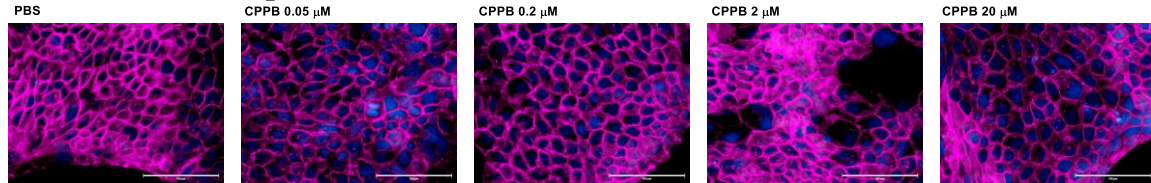

<sup>a</sup>Fluorescent microscopy images at 40x. The cells ( $1 \times 10^5$ ) were treated with CPPB (0.05, 0.2, 2.0, and 20 μM) or PBS for 24h. The cells were treated with E-Cadherin (4A2) mouse mAb (Cell Signaling Technology), followed by goat anti-mouse IgG (H+L) highly cross-adsorbed secondary antibody, Alexa Fluor™ Plus 647. DAPI (4',6-diamidino-2-phenylindole), a blue fluorescent DNA dye, was used to mark the nucleus.

**Figure S4.** Immunofluorescent staining: The DPAGT1 expression level in the selected cancer cell lines (AsPC-1 and Capan-1) treated with CPPB.<sup>a</sup>

**A: DPAGT1 (AsPC-1)**

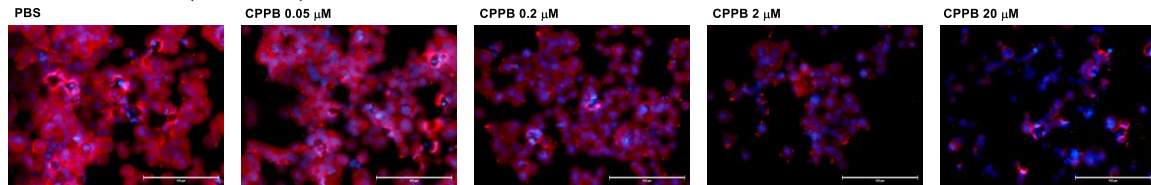

**B: DPAGT1 (Capan-1)**

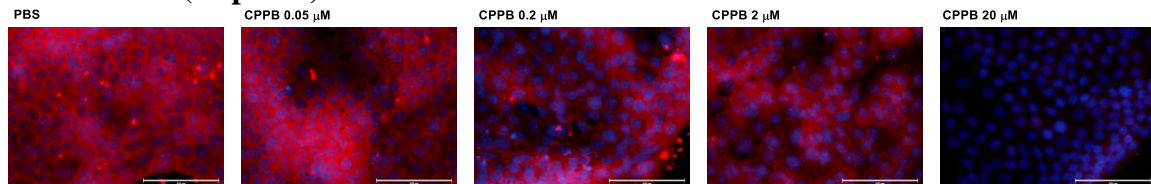

<sup>a</sup>Fluorescent microscopy images at 40x. The cells ( $1 \times 10^5$ ) were treated with CPPB (0.05, 0.2, 2.0, and 20 μM) or PBS for 72h. The cells were treated with DPAGT1 polyclonal antibody (Invitrogen, PA5-72704), followed by goat anti-rabbit IgG (H+L) cross-adsorbed secondary antibody, Alexa Fluor™ 568. DAPI (4',6-diamidino-2-phenylindole), a blue fluorescent DNA dye, was used to mark the nucleus.

**SDS-PAGE and Western blotting assay**

The medium of the cells grown in 10 cm cell culture plate was removed, and the cells were washed once with PBS, and lysed with Pierce RIPA buffer (Thermo Scientific, Cat. #

89901) containing 1x Pierce protease and phosphatase inhibitors (Thermo Scientific, Cat. # 88668). The cell lysate was pelleted down at 15,200 xg at 4 °C for 30min, the cell supernatant was transferred to a fresh Eppendorf tube, and 5 uL of sample was quantitated by using (Quick Start Bradford Dyed Reagent, Biorad, Cat. # 500-0205). 30 μL (1.5 mg total protein /mL) of each protein sample was analyzed by SDS-PAGE (10% gel) followed by Western blotting, and chemiluminescence. Precision Plus Dual Color (Biorad, Cat. # 161-0374) was used as protein standard marker. E-Cadherin (24E10) rabbit mAb (Cell Signaling Technology, Cat. #3195), monoclonal anti-DPAGT1 antibody produced in mouse clone 1G1 (Sigma Aldrich, Cat. #SAB1402754), β-actin (8H10D10) mouse mAb (Cell Signaling Technology, Cat. #3700) and Snail (C15D3) rabbit mAb (Cell Signaling Technology, Cat. #3879) were used as primary antibody. Anti-rabbit IgG, HRP-linked antibody (Cell Signaling Technology, Cat. #7074) or anti-mouse IgG, HRP-linked antibody (Cell Signaling Technology, Cat. #7076) were used as secondary antibody. Clarity Western ECL Substrate (Biorad, Cat. # 170-5060) was used to develop the probe signal, and Classic Blue BX film (MidSci, Ref. # 604 5983) was used for chemiluminescence.

**Figure S5.** Western blotting assay for selected cancer cell lines (PD002, PANC-1 and HCT-116) treated with CPPB.<sup>a</sup>

**A: PD002<sup>b</sup>**

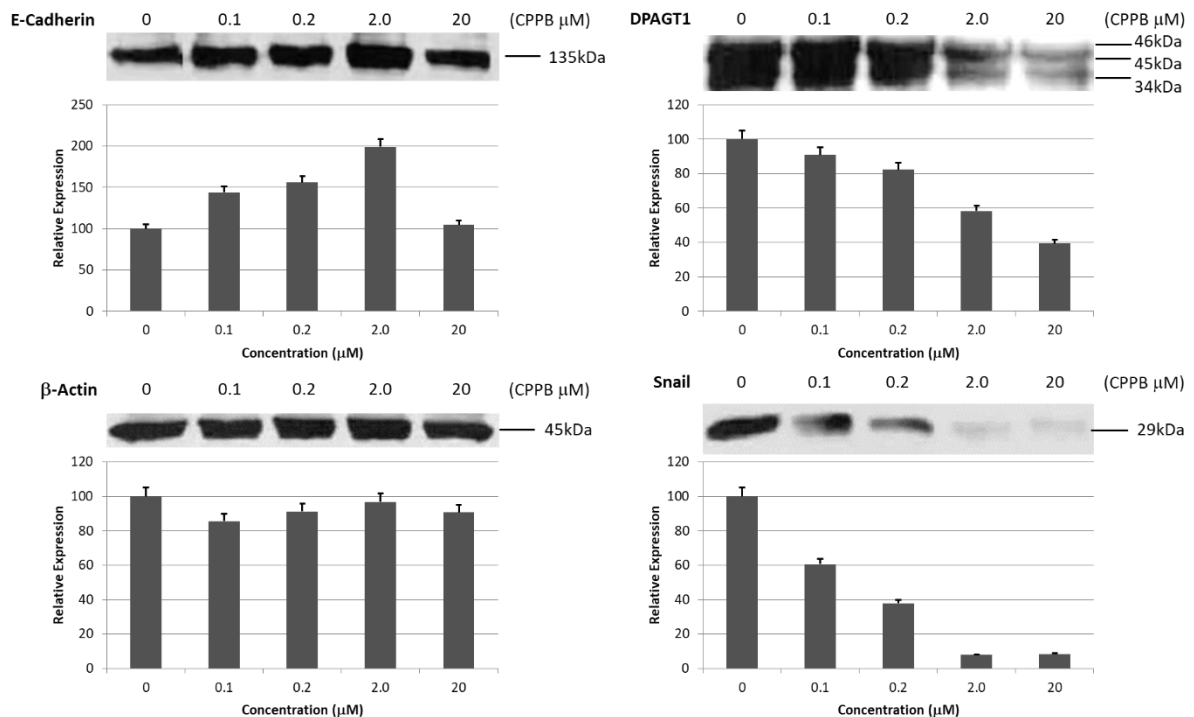

## B: PANC-1<sup>c</sup>

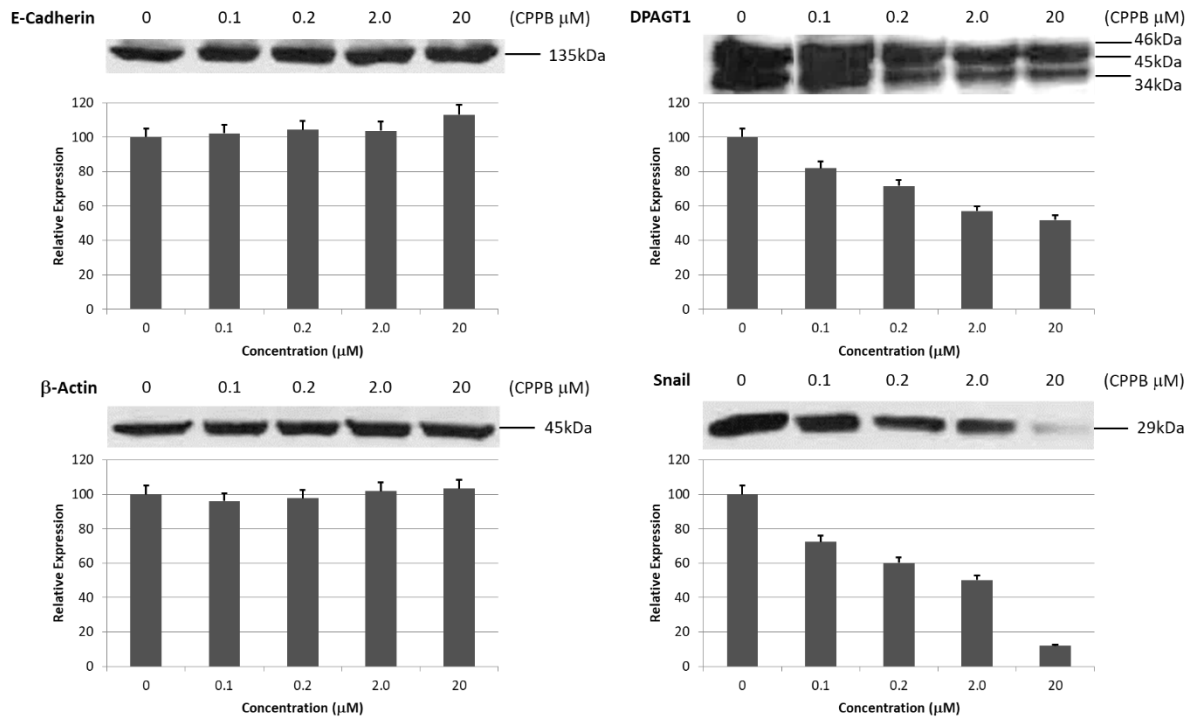

## C: HCT-116<sup>d,f</sup>

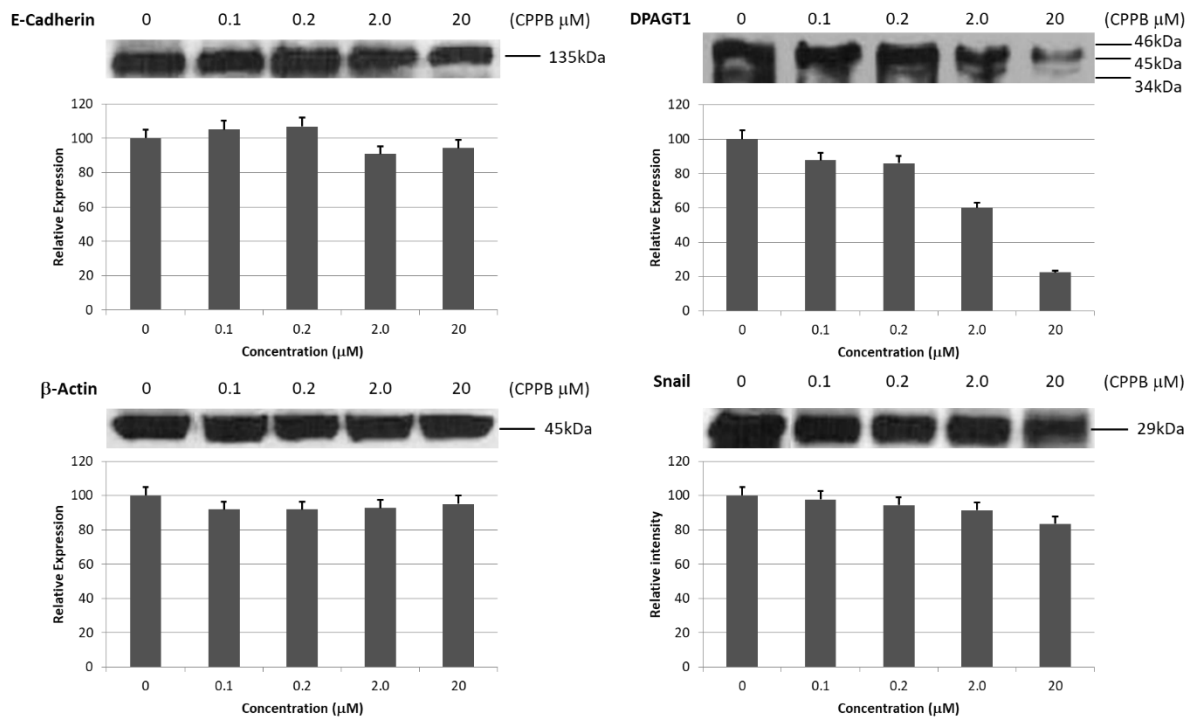

## D: SiHa<sup>e</sup>

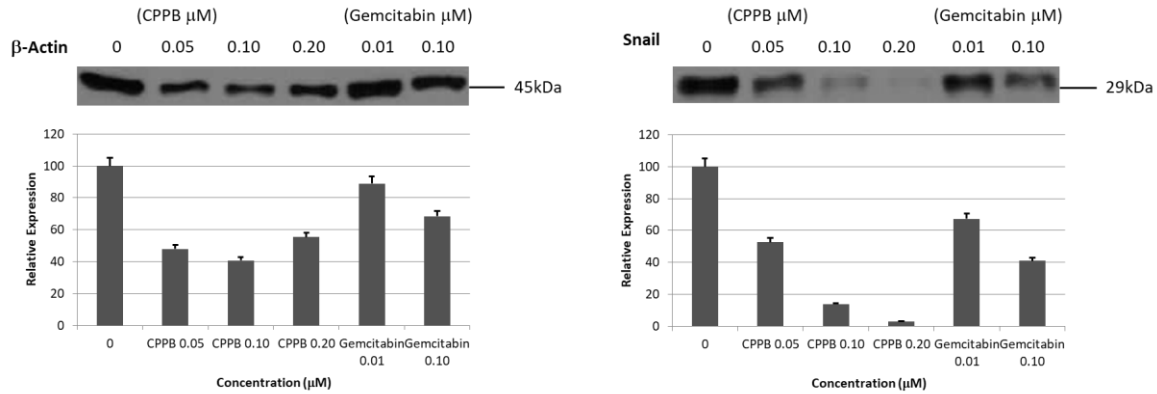

<sup>a</sup>The relative expression level was quantified by using Image Studio™ Lite quantification software. <sup>b</sup>Exposure time: E-Cadherin (5min), DPAGT1 (15min),  $\beta$ -actin (30sec), Snail (2min). <sup>c</sup>Exposure time: E-Cadherin (5min), DPAGT1 (15min),  $\beta$ -actin (2sec), Snail (2min). <sup>d</sup>Exposure time: E-Cadherin (5min), DPAGT1 (2min),  $\beta$ -actin (10sec), Snail (2min). <sup>e</sup>Exposure time:  $\beta$ -actin (5sec), Snail (2min). <sup>f</sup>The cell lysate for DPAGT1 was prepared by ultracentrifugation (130,000  $\times$ g for 1h at 4 °C) and 30  $\mu$ L of the lysate was analyzed.

## Synergistic effect of CPPB with paclitaxel

The synergistic or antagonistic activities of CPPB (5) with paclitaxel were assessed *in vitro* via micro dilution broth checkerboard technique. PD002 cells (180  $\mu$ L,  $1 \times 10^4$ /mL) were placed in each well of a 96well plate. The cells were treated with a combination of CPPB (0-50  $\mu$ M) and paclitaxel (5-0.024  $\mu$ M), and cultured at 37 °C for 72h under 5% CO<sub>2</sub>. Antiproliferation kinetic of each well were monitored by using an IncuCyte Live-Cell Imaging System (Essen BioScience, Ann Arbor, MI).

**Figure S6.** Fractional Inhibitory Concentration (FIC) of a combination of CPPB and paclitaxel against a patient-derived pancreatic adenocarcinoma PD002.<sup>a</sup>

$\Sigma$ FIC<sup>b</sup> index for the wells at growth–no growth interface.

|   | 1        | 2        | 3        | 4        | 5        | 6        | 7        | 8        | 9        | 10       | 11        | 12        | C <sub>A</sub> : CPPB ( $\mu$ M)       |
|---|----------|----------|----------|----------|----------|----------|----------|----------|----------|----------|-----------|-----------|----------------------------------------|
| A | 0.001953 | 0.003906 | 0.007813 | 0.01563  | 0.03125  | 0.06250  | 0.1250   | 0.2500   | 0.5000   | 1.0000   | 2.0000    | 4.0000    | 0                                      |
| B | 0.002239 | 0.004478 | 0.008956 | 0.01791  | 0.03582  | 0.07164  | 0.14328  | 0.28656  | 0.57312  | 1.14624  | 2.29248   | 4.58496   | 0.01                                   |
| C | 0.003382 | 0.006764 | 0.013528 | 0.027056 | 0.054112 | 0.108224 | 0.216448 | 0.432896 | 0.865792 | 1.731584 | 3.463168  | 6.926336  | 0.05                                   |
| D | 0.004810 | 0.009620 | 0.019240 | 0.038480 | 0.076960 | 0.153920 | 0.307840 | 0.615680 | 1.231360 | 2.462720 | 4.925440  | 9.850880  | 0.1                                    |
| E | 0.007667 | 0.015334 | 0.030668 | 0.061336 | 0.122672 | 0.245344 | 0.490688 | 0.981376 | 1.962752 | 3.925504 | 7.851008  | 15.702016 | 0.2                                    |
| F | 0.05910  | 0.11820  | 0.23640  | 0.47280  | 0.94560  | 1.89120  | 3.78240  | 7.56480  | 15.12960 | 30.25920 | 60.51840  | 121.03680 | 2.0                                    |
| G | 0.5734   | 1.1468   | 2.2936   | 4.5872   | 9.1744   | 18.3488  | 36.6976  | 73.3952  | 146.7904 | 293.5808 | 587.1616  | 1174.3232 | 20.0                                   |
| H | 1.4305   | 2.8610   | 5.7220   | 11.4440  | 22.8880  | 45.7760  | 91.5520  | 183.1040 | 366.2080 | 732.4160 | 1464.8320 | 2929.6640 | 50.0                                   |
|   | 0.0024   | 0.0049   | 0.0098   | 0.020    | 0.039    | 0.078    | 0.16     | 0.31     | 0.63     | 1.25     | 2.5       | 5         | C <sub>B</sub> : Paclitaxel ( $\mu$ M) |

Highlighted in orange: growth, others: non-growth

<sup>a</sup>The IC<sub>50</sub> values of CPPB and paclitaxel against PD002 are 35.0 and 1.25  $\mu$ M, respectively.

<sup>b</sup> $\Sigma$ FIC is the sum of fractional inhibitory concentration calculated by the equation  $\Sigma$ FIC = FIC<sub>A</sub> + FIC<sub>B</sub> = C<sub>A</sub>/IC<sub>50A</sub> + C<sub>B</sub>/IC<sub>50B</sub>. MIC<sub>A</sub> and MIC<sub>B</sub>: MIC of drugs A and B, C<sub>A</sub> and

$C_B$ =concentrations of drugs A and B used in combination. In these interaction studies,  $\Sigma FIC$  of less than 0.5 represents synergistic activity.

CPPB 0  $\mu$ M, Paclitaxel 0  $\mu$ M

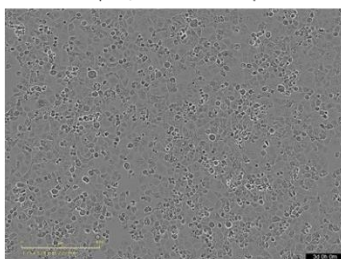

CPPB 0  $\mu$ M, Paclitaxel 0.63  $\mu$ M

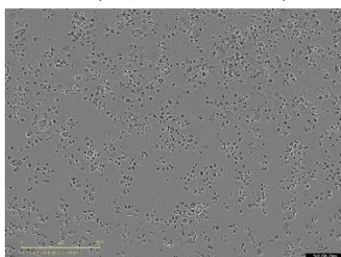

CPPB 0.1  $\mu$ M, Paclitaxel 0.16  $\mu$ M

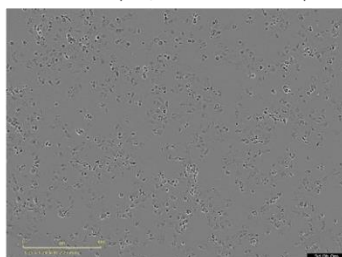

CPPB 0.2  $\mu$ M, Paclitaxel 0.020  $\mu$ M

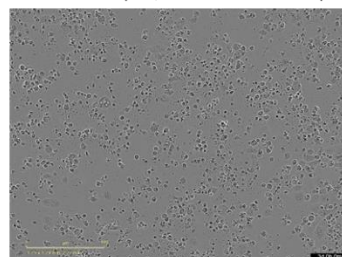

CPPB 2.0  $\mu$ M, Paclitaxel 0.0024  $\mu$ M

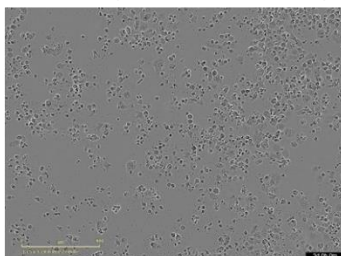

CPPB 20  $\mu$ M, Paclitaxel 0.0024  $\mu$ M

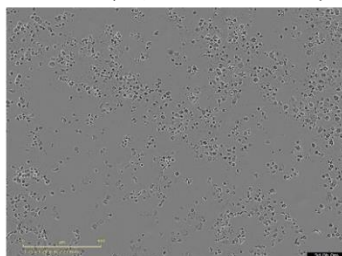

CPPB 50  $\mu$ M, Paclitaxel 0.0024  $\mu$ M

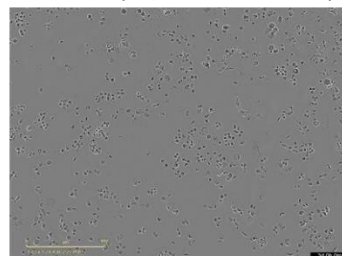

### **Computational methods – DPAGT1 inhibitor study**

*Protein preparation.* All molecular modeling and docking studies were performed using the experimental structure of the human GPT (DPAGT1, H129 variant) with bound tunicamycin (PDB 6BW6).<sup>7</sup> The biological unit was downloaded and prepared using the Protein Preparation Wizard of the Maestro Small Molecule Drug Discovery Suite (Schrödinger, LLC).<sup>8</sup> Hydrogens were added, when applicable, and protonation and tautomeric states were assigned using the Epic program.<sup>9</sup> Lone waters were removed and the protein was refined by optimizing H-bond assignments and performing a restrained minimization using MacroModel.<sup>10</sup>

*Docking site preparation.* The docking receptor grid was prepared using Schrödinger's Glide program.<sup>11, 12</sup> The docking grid was defined as 25 Å region centroid of the bound tunicamycin compound. Van der Waals radius scaling was employed with a scaling factor of 1.0 and partial charge cutoff of 0.25 (default values). No docking constraints or excluded volumes were defined. Hydroxyl and thiol groups within close proximity to the bound tunicamycin compound ( $\leq 3\text{Å}$ ) were defined as rotatable.

*Inhibitor docking.* Compounds were built and prepared for docking using the LigPrep program using default settings (Schrödinger, LLC).<sup>11</sup> The DPAGT1 inhibitors, non-inhibitors, and weak inhibitor reported herein were docked into the prepared protein using Schrödinger's Glide program using XP (extra precision) settings using the grid described above.<sup>13</sup>



**Table S1.** DPAGT1 inhibitors of capuramycin analogues possessing antimigratory activities of pancreatic cancer cell lines.

| Compound                                                                                                      | IC <sub>50</sub> (DPAGT1) | Glide XP Score |
|---------------------------------------------------------------------------------------------------------------|---------------------------|----------------|
| 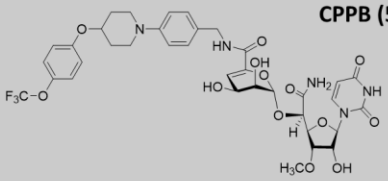 <p><b>CPPB (5)</b></p>      | 200 nM                    | -16.6          |
|  <p><b>I-CPPB (6)</b></p>    | 600 nM                    | -12.4          |
|  <p><b>CPPA (9)</b></p>      | >50 μM                    | -14.5          |
|  <p><b>I-CPPA (10)</b></p>  | >50 μM                    | -14.6          |
|  <p><b>OM-CPPB (7)</b></p> | 20 μM                     | -13.6          |
|  <p><b>DM-CPPB (8)</b></p> | >50 μM                    | -12.9          |
|  <p><b>I-CAP (3)</b></p>   | 11.5 μM                   | -10.9          |
|  <p><b>OM-CAP (2)</b></p>  | 4.5 μM                    | -12.9          |

## References

- [1] Kurosu, M.; Li, K.; Crick, D. C. Concise synthesis of capuramycin. *Org. Lett.* **2009**, *11*, 2393-2396.
- [2] Kang, S.; Kim, R. Y.; Seo, M. J.; Lee, S.; Kim, Y. M.; Seo, M.; Seo, J. J.; Ko, Y.; Choi, I.; Jang, J.; Nam, J.; Park, S.; Kang, H.; Kim, H. J.; Kim, J.; Ahn, S.; Pethe, K.; Nam, K.; No, Z.; Kim, J. Lead optimization of a novel series of imidazo[1,2-*a*]pyridine amides leading to a clinical candidate (Q203) as a multi- and extensively-drug-resistant anti-tuberculosis agent. *J. Med. Chem.* **2014**, *57*, 5293-5305.
- [3] Siricilla, S.; Mitachi, K.; Skorupinska-Tudek, K.; Swiezewska, E.; Kurosu, M. Biosynthesis of a water-soluble lipid I analogue and a convenient assay for translocase I, *Anal. Biochem.* **2014**, *461*, 36-45.
- [4] Mitachi, K.; Siricilla, S.; Yang, D.; Kong, Y.; Skorupinska-Tudek, K.; Swiezewska, E.; Franzblau, S. G.; Kurosu, M. Fluorescence-based assay for polyprenyl phosphate-GlcNAc-1-phosphate transferase (WecA) and identification of a novel antimycobacterial WecA inhibitors. *Anal. Biochem.* **2016**, *512*, 78-90.
- [5] Mitachi, K.; Yun, H-G.; Kurosu, S. M.; Eslamimehr, S.; Lemieux, M. R.; Klaić, L.; Clemons, W. M.; Kurosu, M. Novel FR-900493 analogs that inhibit outgrowth of *Clostridium difficile* spores. *ACS Omega* **2018**, *3*, 1726-1739.
- [6] Mitachi, K.; Kurosu, S. M.; Gillman, C. D.; Yun, H-G.; Clemons, W. M.; Kurosu, M. A practical synthesis of a novel DPAGT1 inhibitor, aminouridyl phenoxy piperidinbenzyl butanamide (APPB) for in vivo studies. *MethodsX* **2019**, *6*, 2305-2321.
- [7] Dong, Y. Y.; Wang, H.; Pike, A. C. W.; Cochrane, S. A.; Hamedzadeh, S.; Wyszynski, F. J.; Bushell, S. R.; Royer, S. F.; Widdick, D. A.; Sajid, A.; Boshoff, H. I.; Park, Y.; Lucas, R.; Liu, W. M.; Lee, S. S.; Machida, T.; Minall, L.; Mehmood, S.; Belaya, K.; Liu, W. W.; Chu, A.; Shrestha, L.; Mukhopadhyay, S. M. M.; Strain-Damerell, C.; Chalk, R.; Burgess-Brown, N. A.; Bibb, M. J.; Barry III, C. E.; Robinson, C. V.; Beeson, D.; Davis, B. G.; Carpenter, E. P. Structures of DPAGT1 explain glycosylation disease mechanisms and advance TB antibiotic design. *Cell* **2018**, *175*, 1045-1058.
- [8] Schrödinger Release 2019-4: Maestro, Schrödinger, LLC, New York, NY, **2019**.
- [9] Greenwood, J. R.; Calkins, D.; Sullivan, A. P.; Shelley, J. C. Towards the comprehensive, rapid, and accurate prediction of the favorable tautomeric states of drug-like molecules in aqueous solution. *J. Comput. Aided Mol. Des.* **2010**, *24*, 591-604.
- [10] Schrödinger Release 2019-4: MacroModel, Schrödinger, LLC, New York, NY, **2019**.
- [11] Schrödinger Release 2019-4: LigPrep, Schrödinger, LLC, New York, NY, **2019**.
- [12] Friesner, R. A.; Banks, J. L.; Murphy, R. B.; Halgren, T. A.; Klicic, J. J.; Mainz, D. T.; Repasky, M. P.; Knoll, E. H.; Shelley, M.; Perry, J. K.; Shaw, D. E.; Francis, P.; Shenkin, P. S. Glide: a new approach for rapid accurate docking and scoring. 1. Method and assessment of docking accuracy. *J. Med. Chem.* **2004**, *25*, 1739-1749.
- [13] Friesner, R. A.; Murphy, R. B.; Repasky, M. P.; Frye, L. L.; Greenwood, J. R.; Halgren, T. A.; Sanschagrin, P. C.; Mainz, D. T. Extra precision glide: docking and scoring incorporating a model of hydrophobic enclosure for protein-ligand complexes. *J. Med. Chem.* **2006**, *49*, 6177-6196.

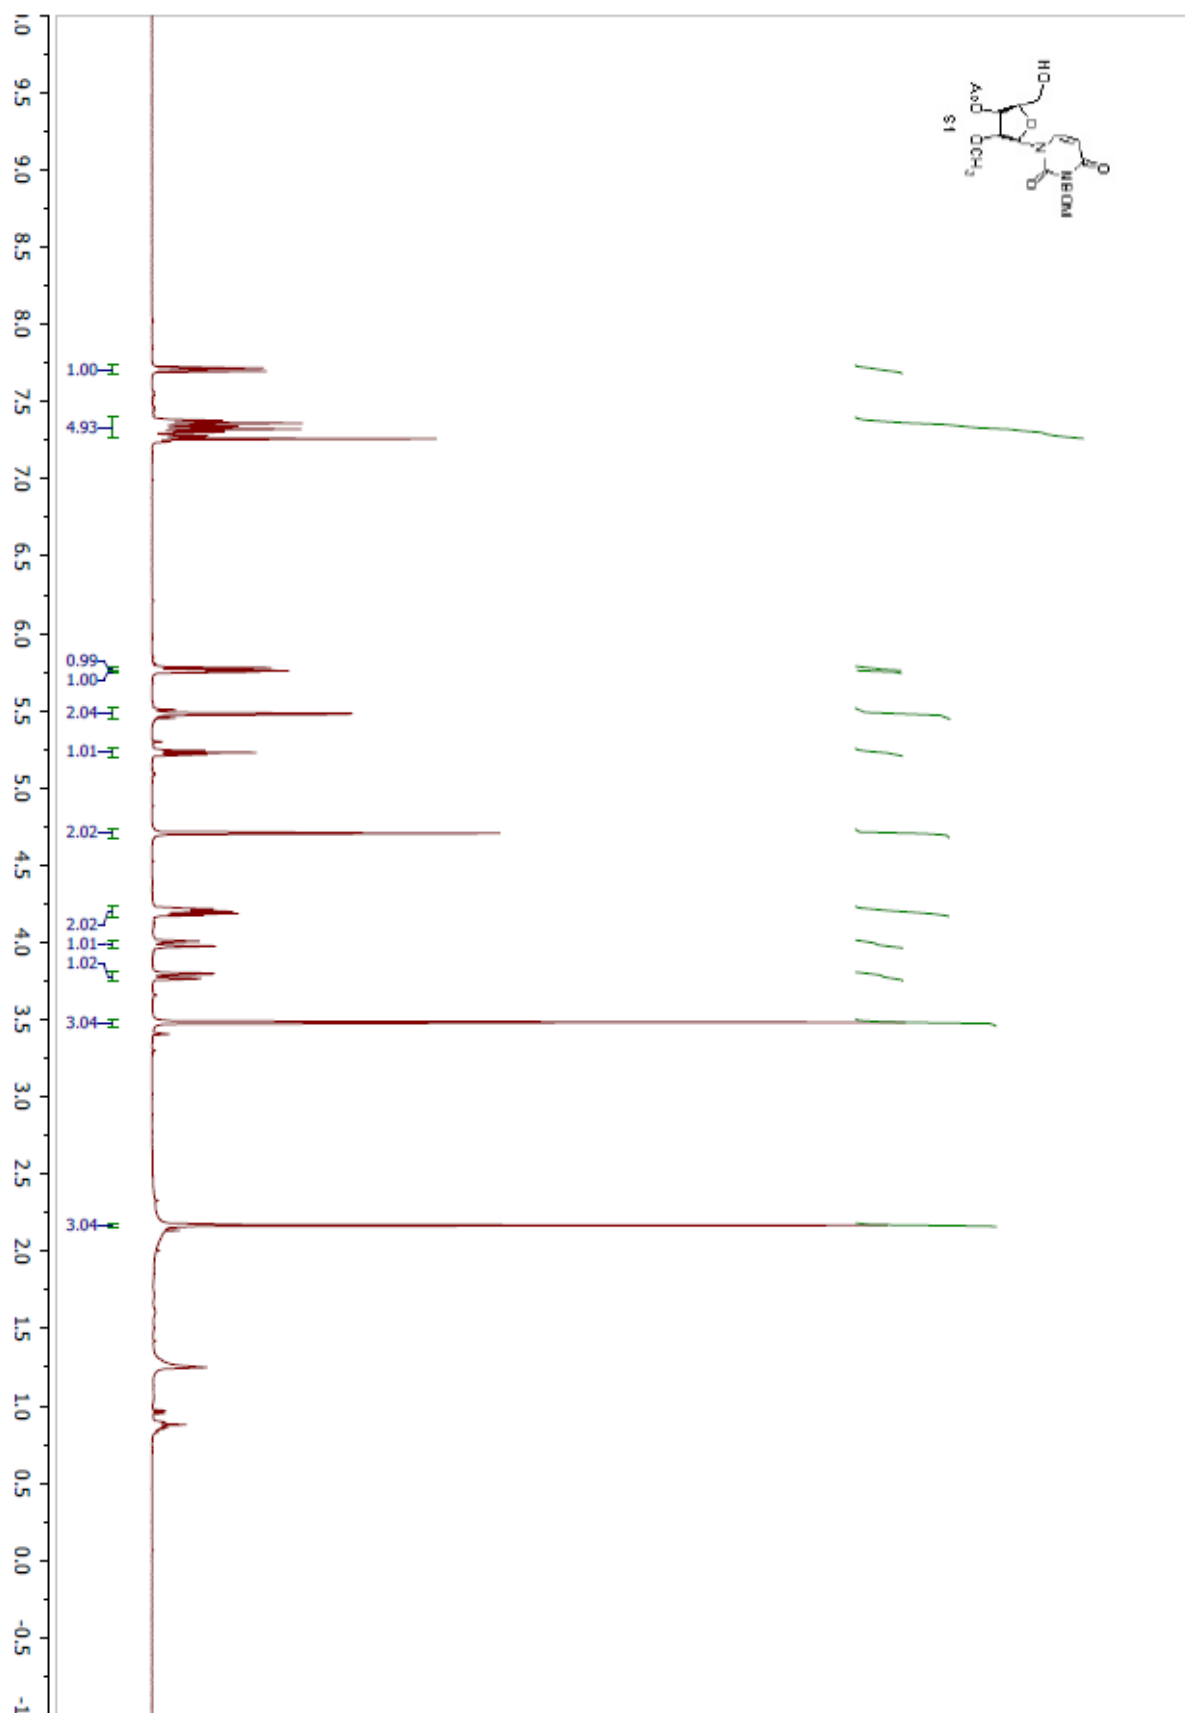

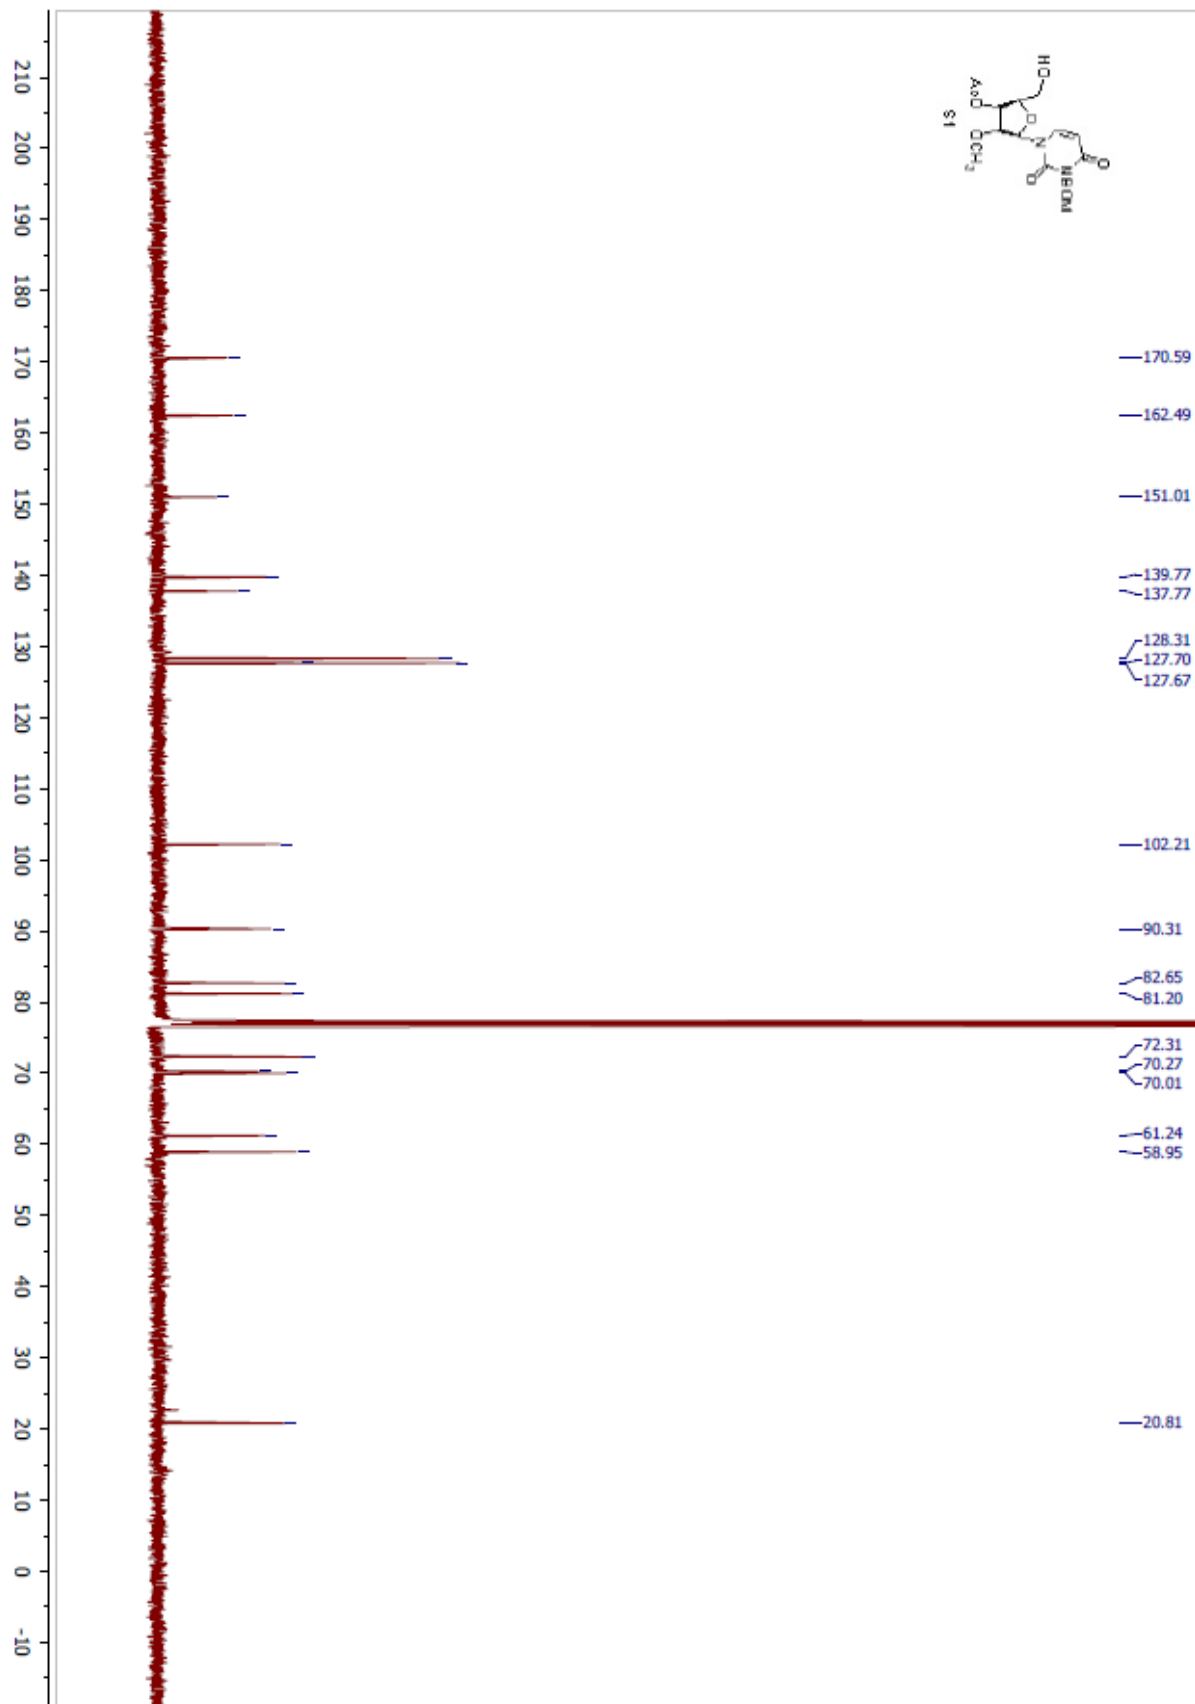

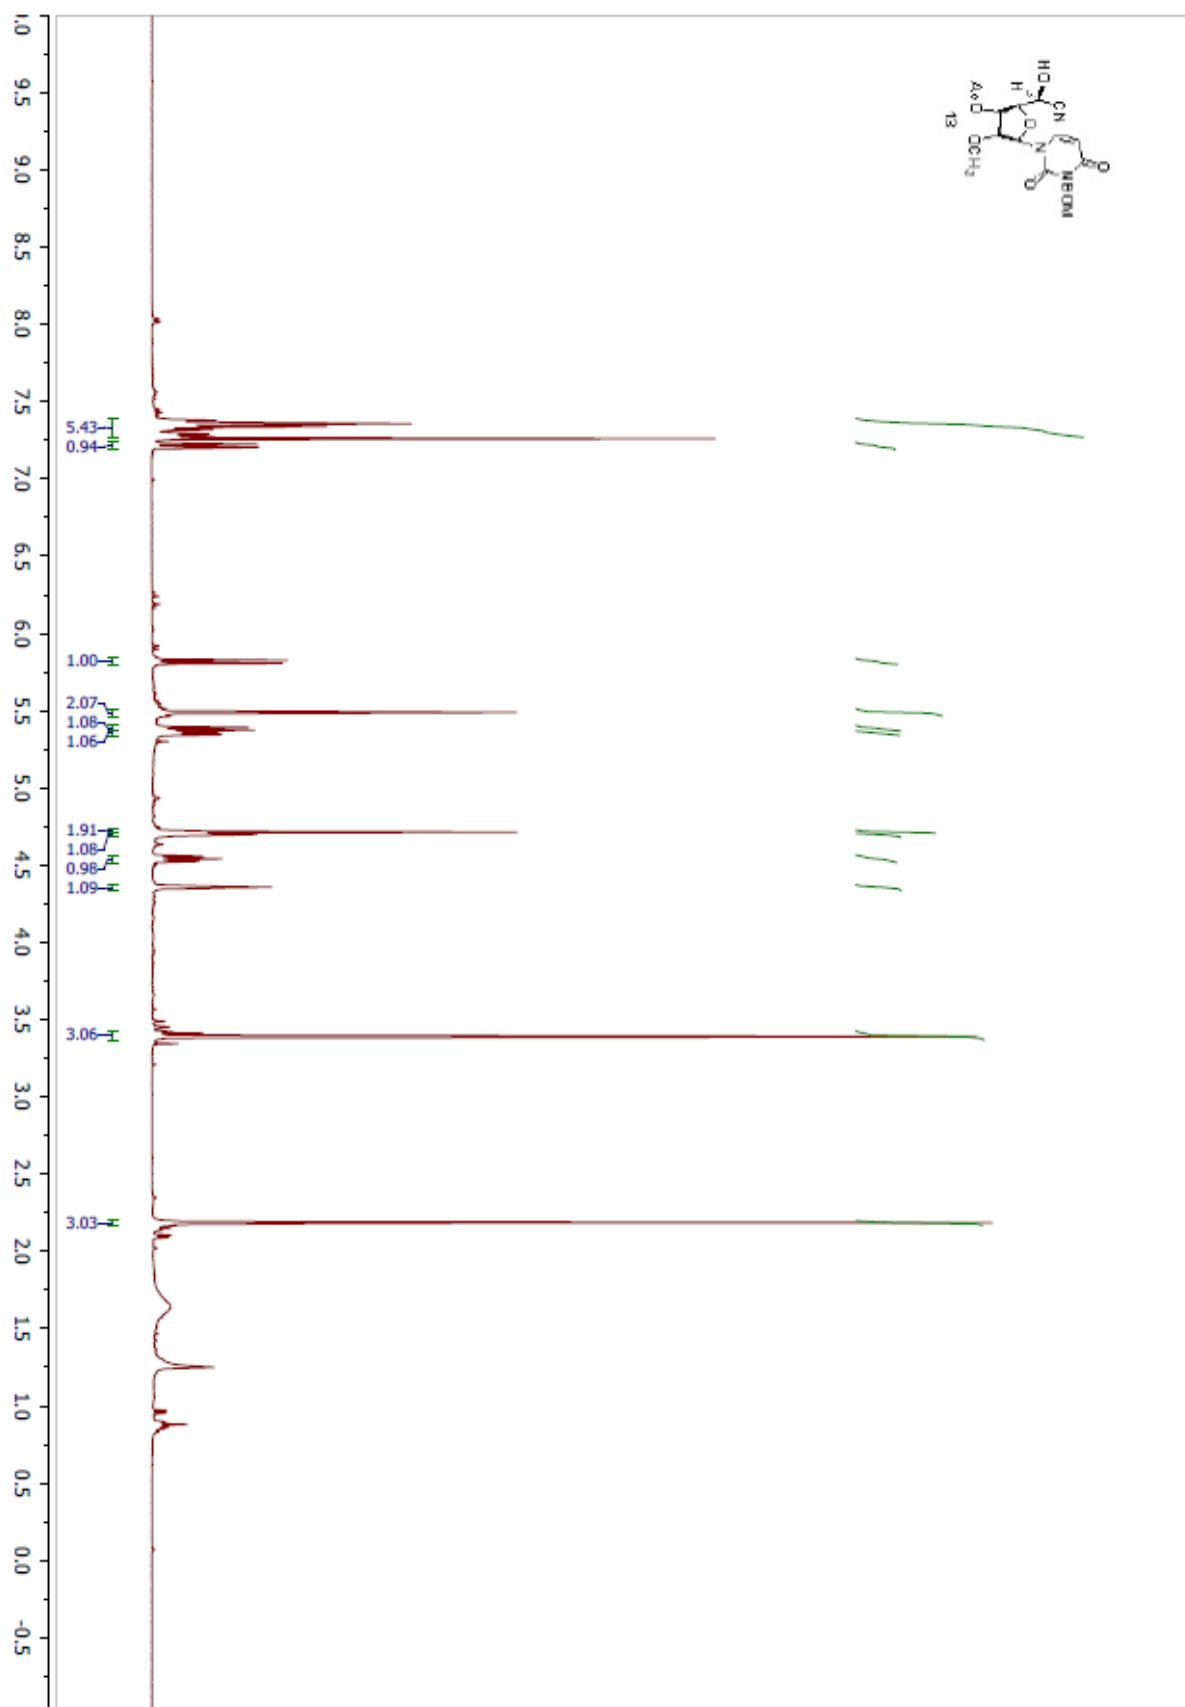

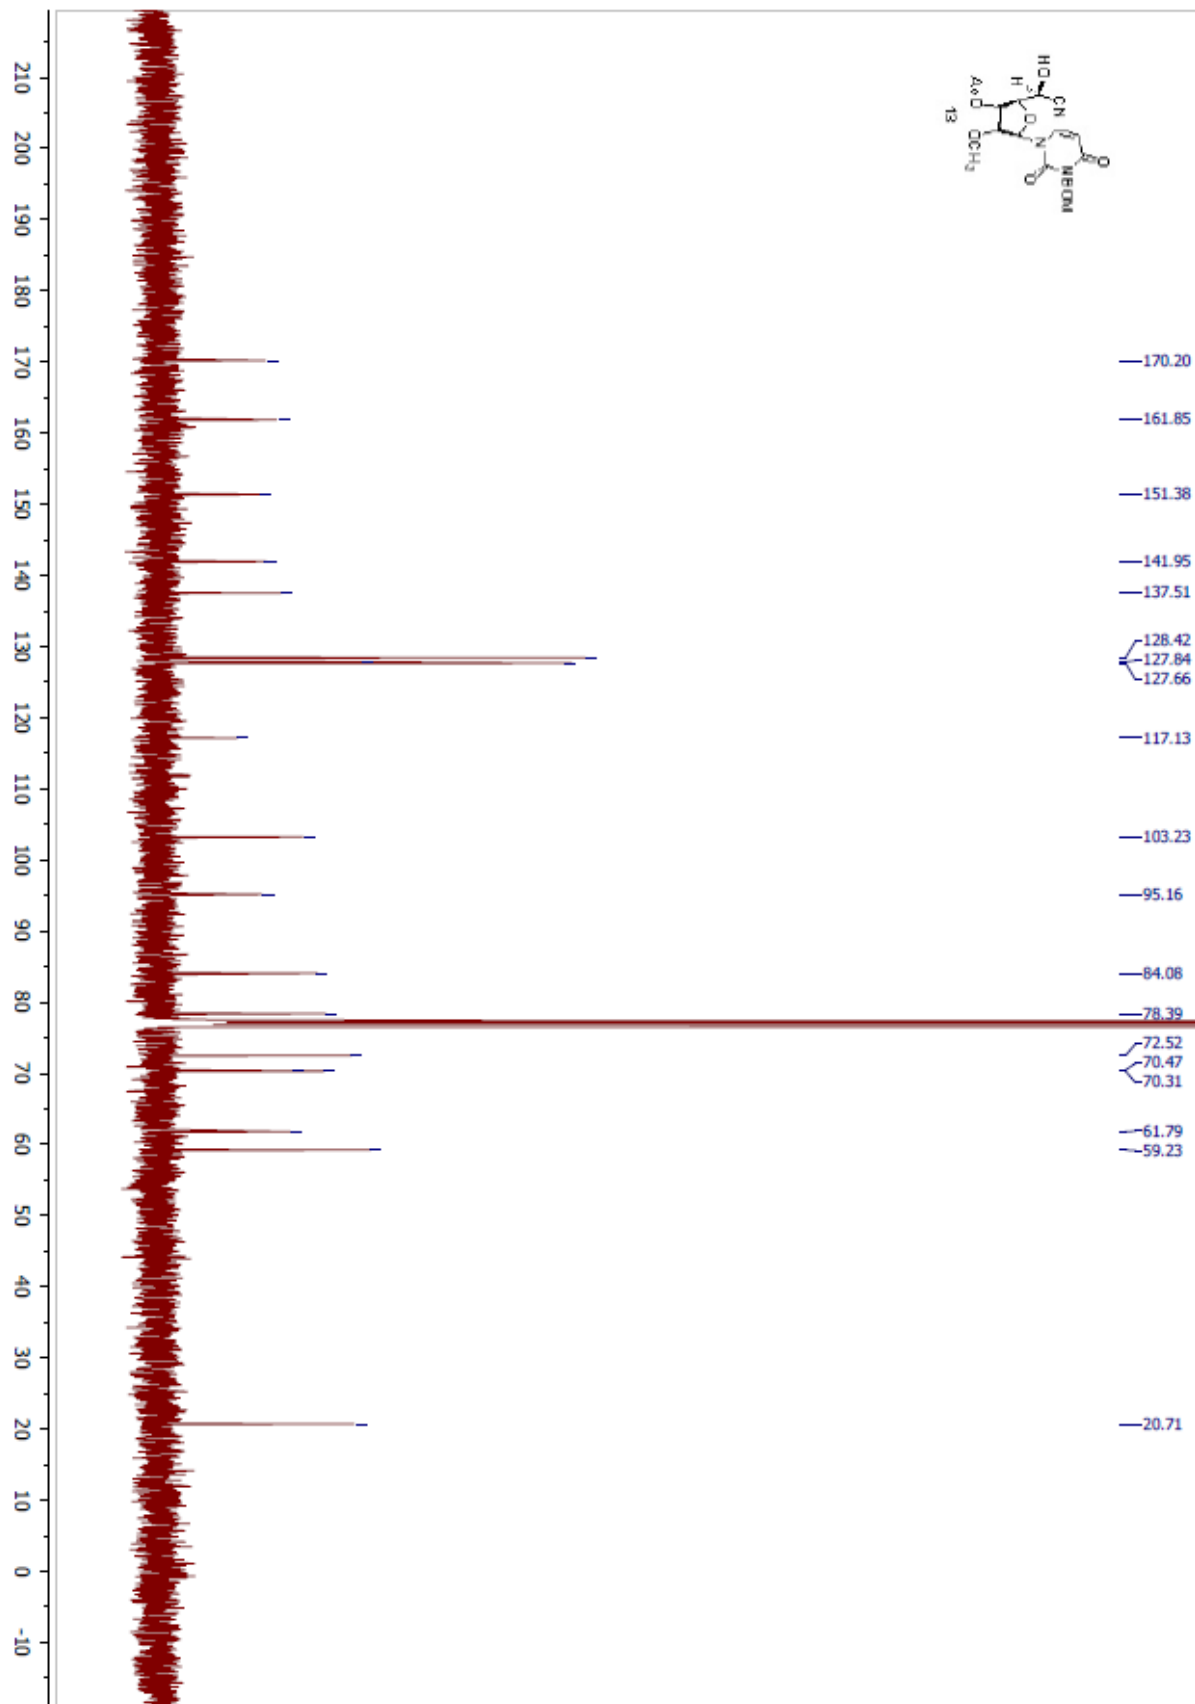

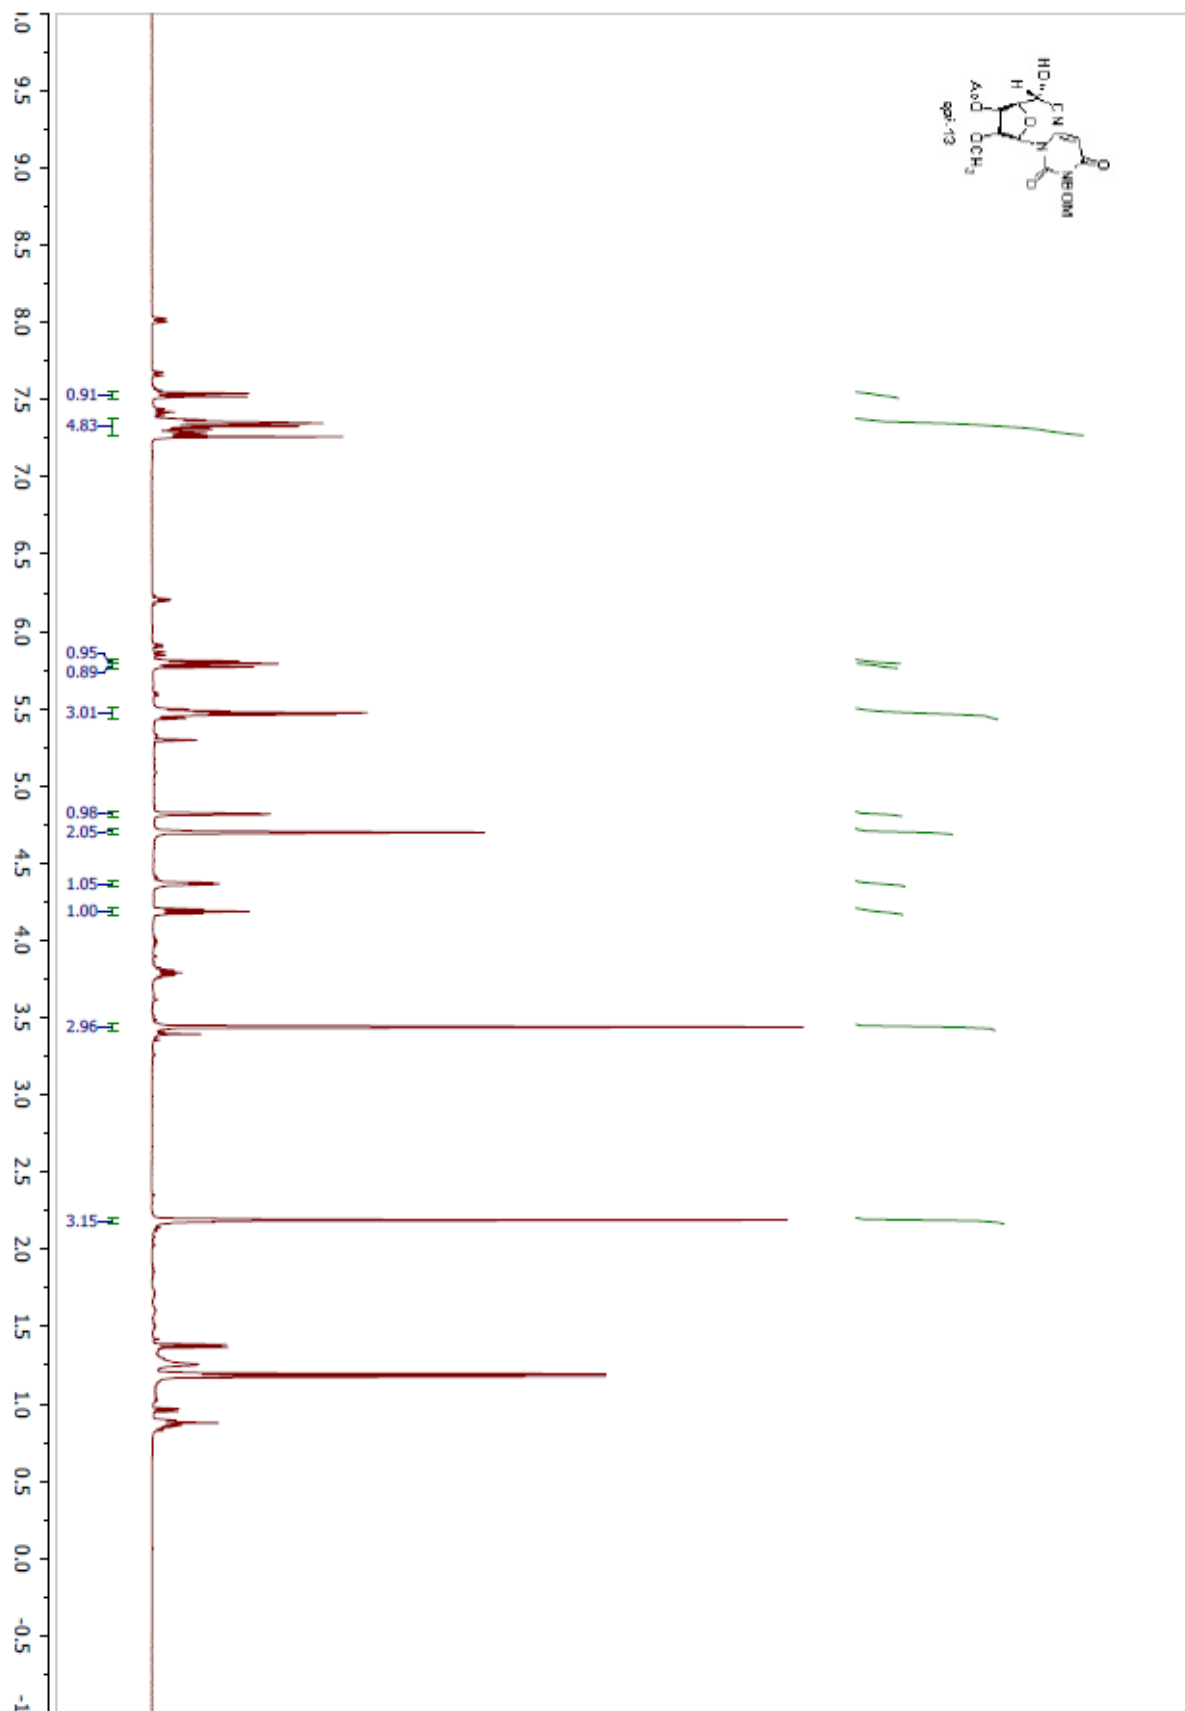

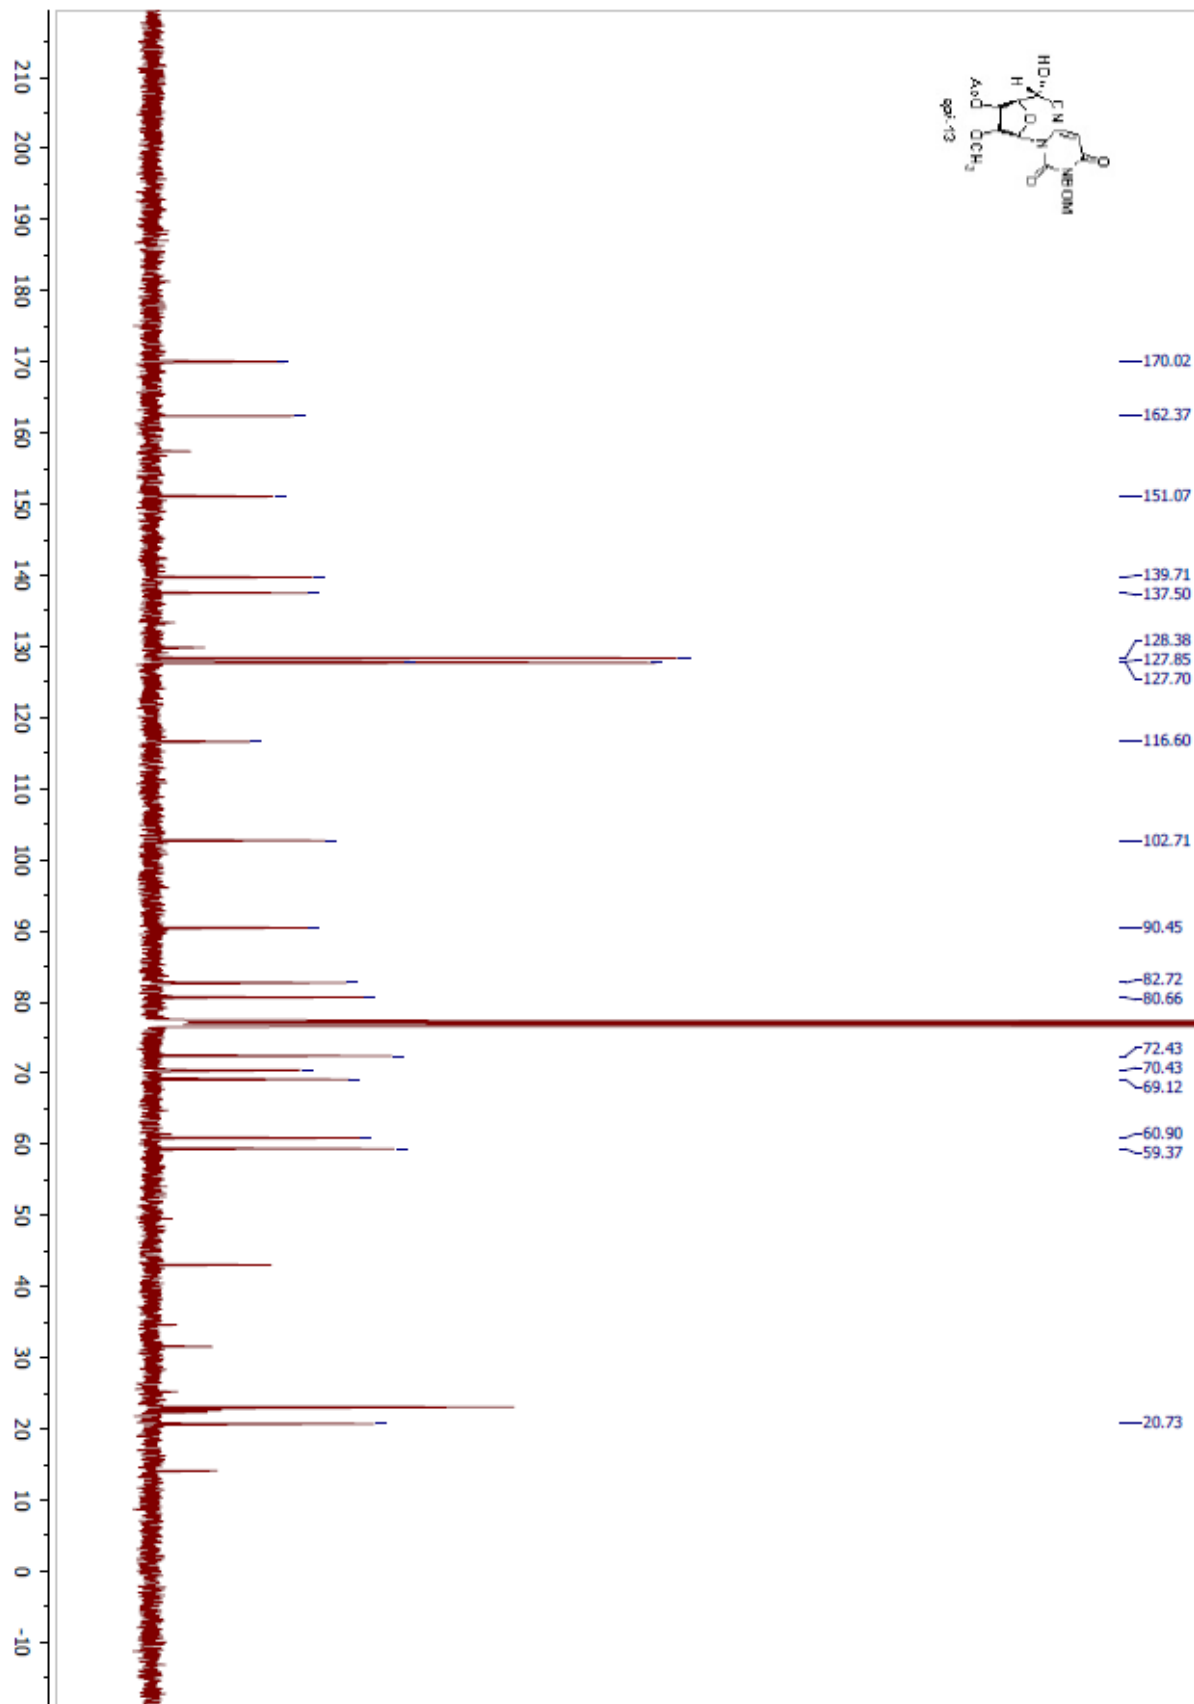



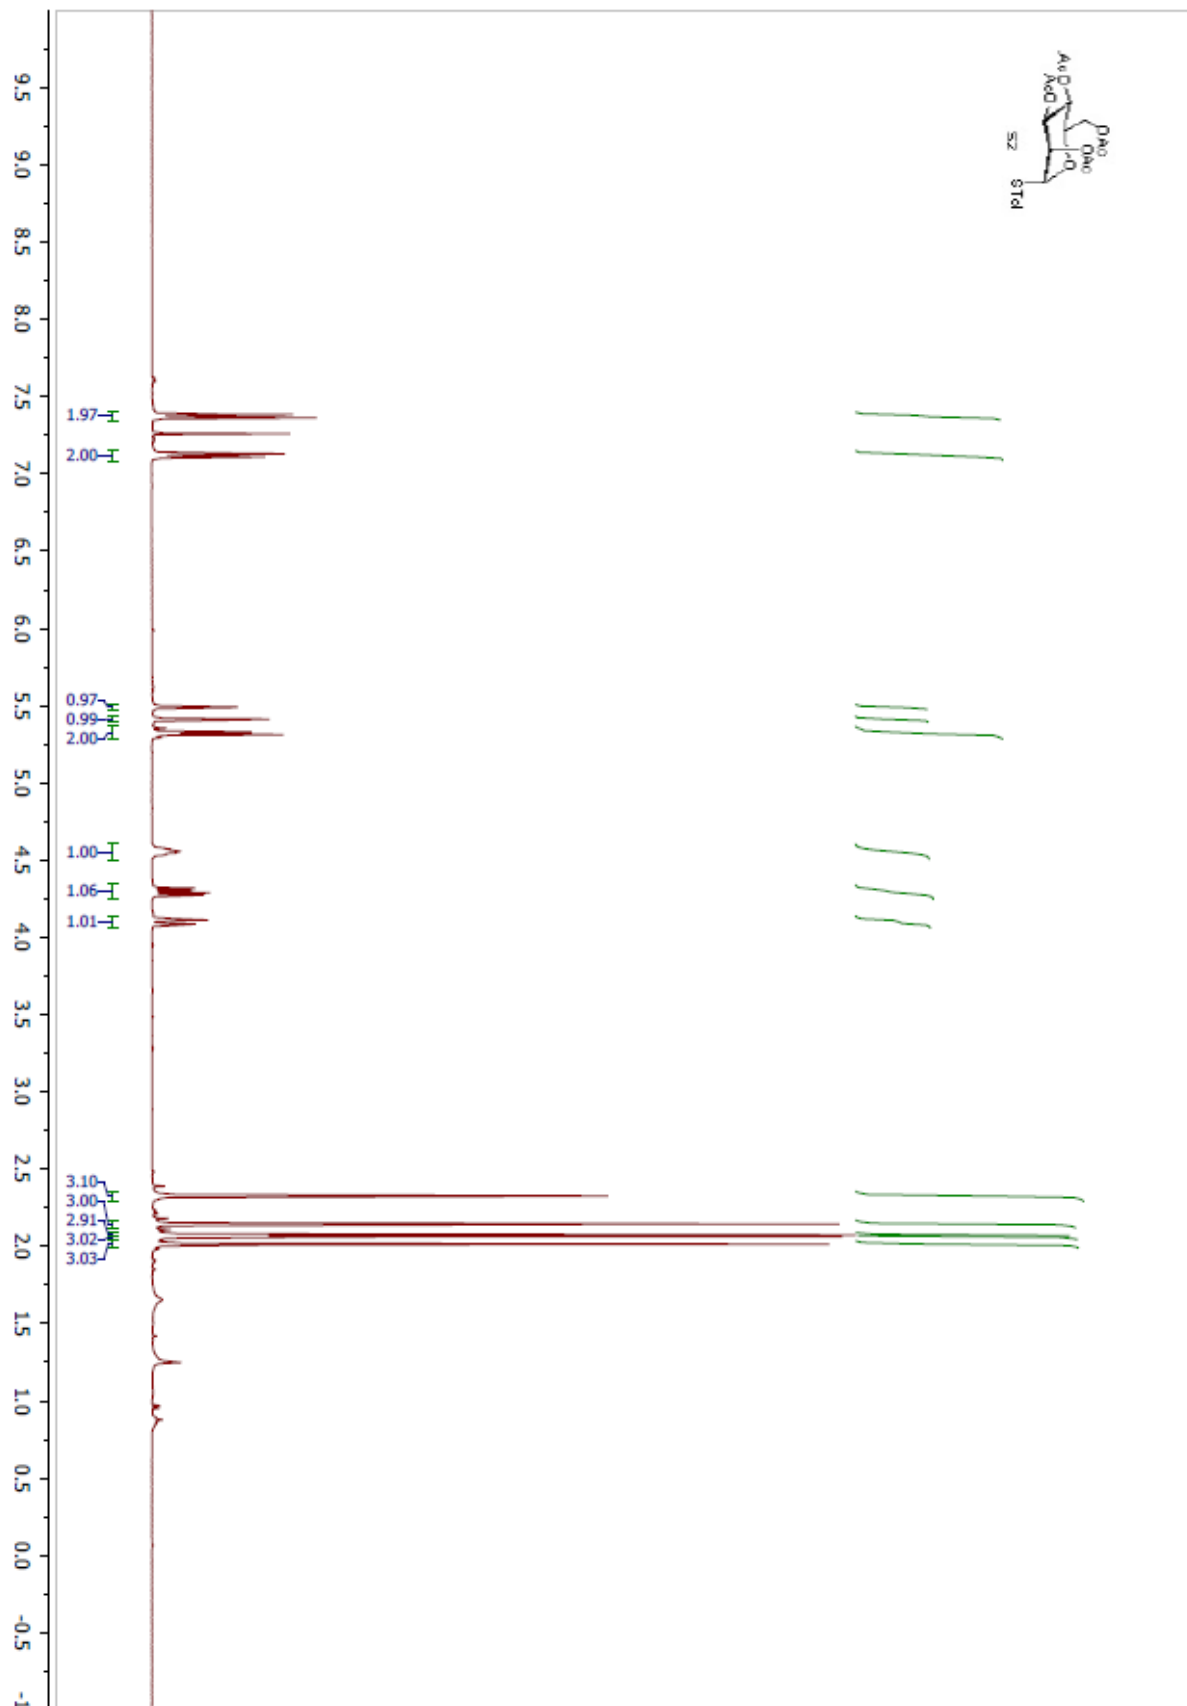

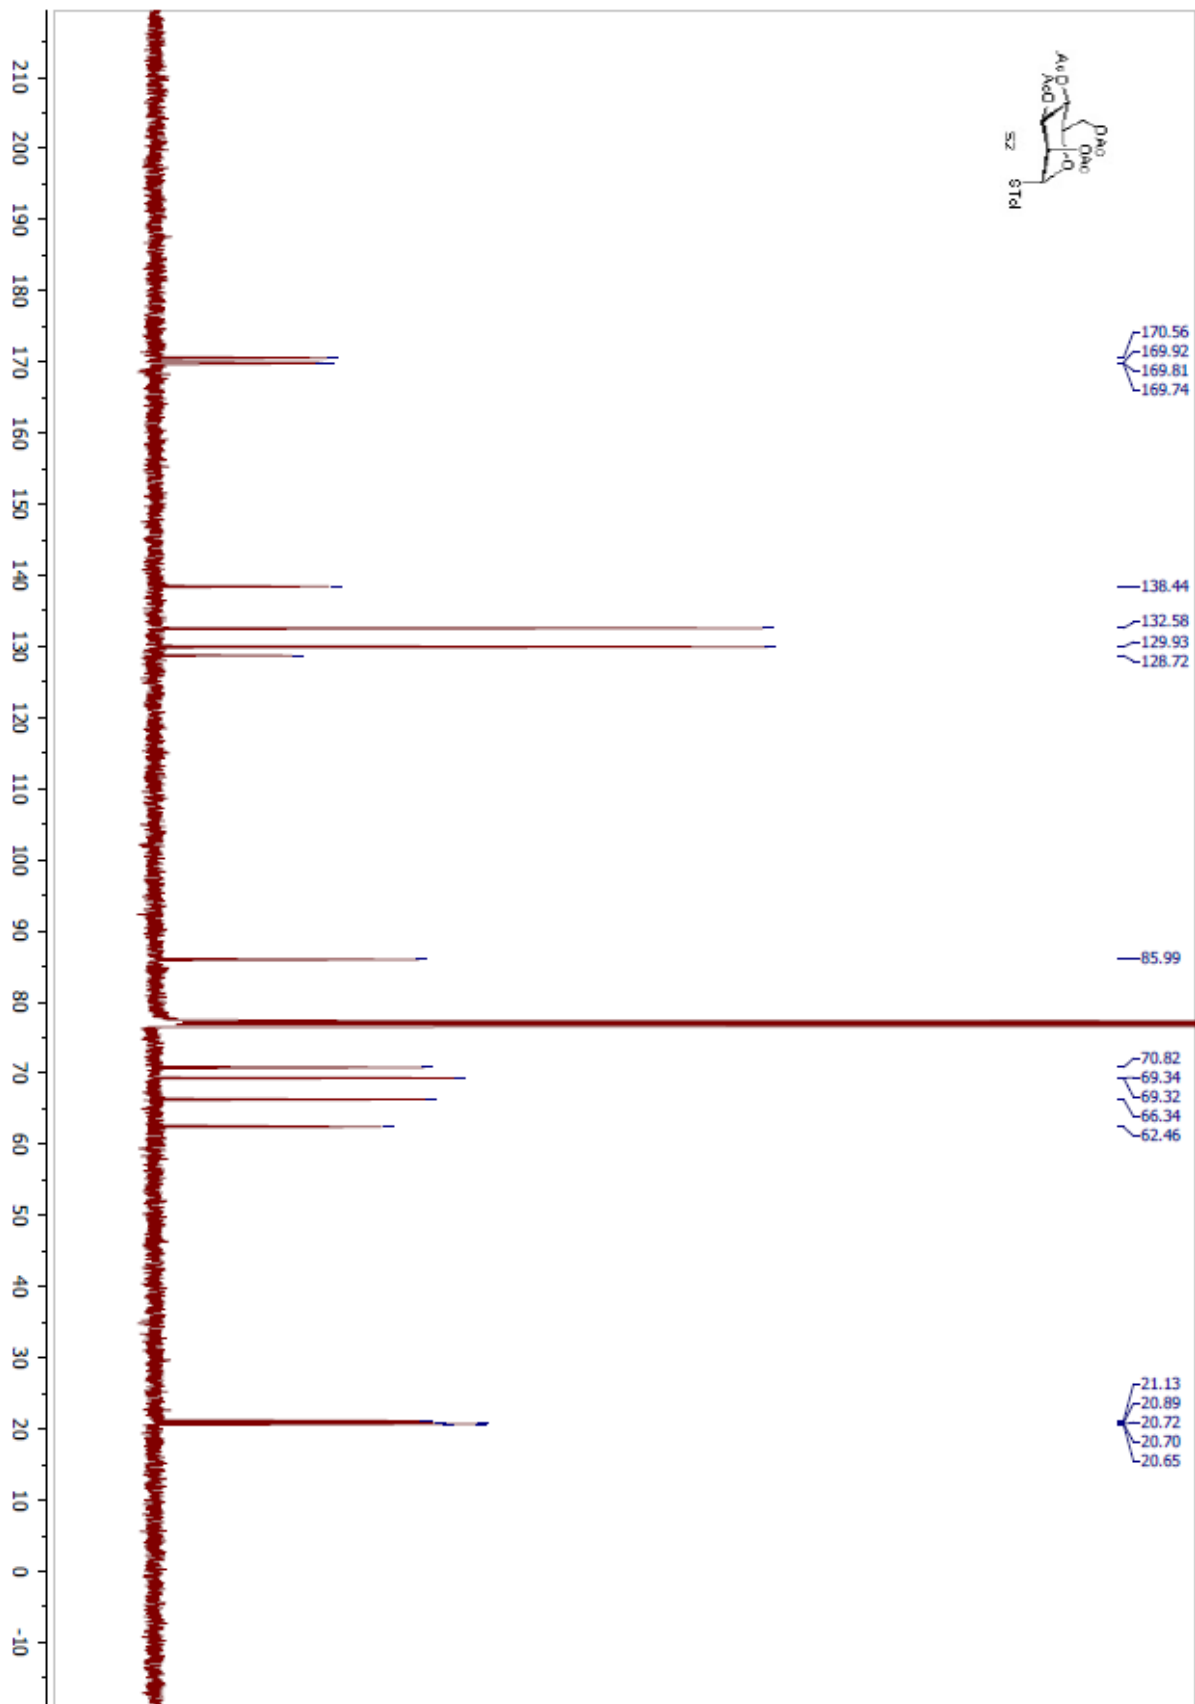

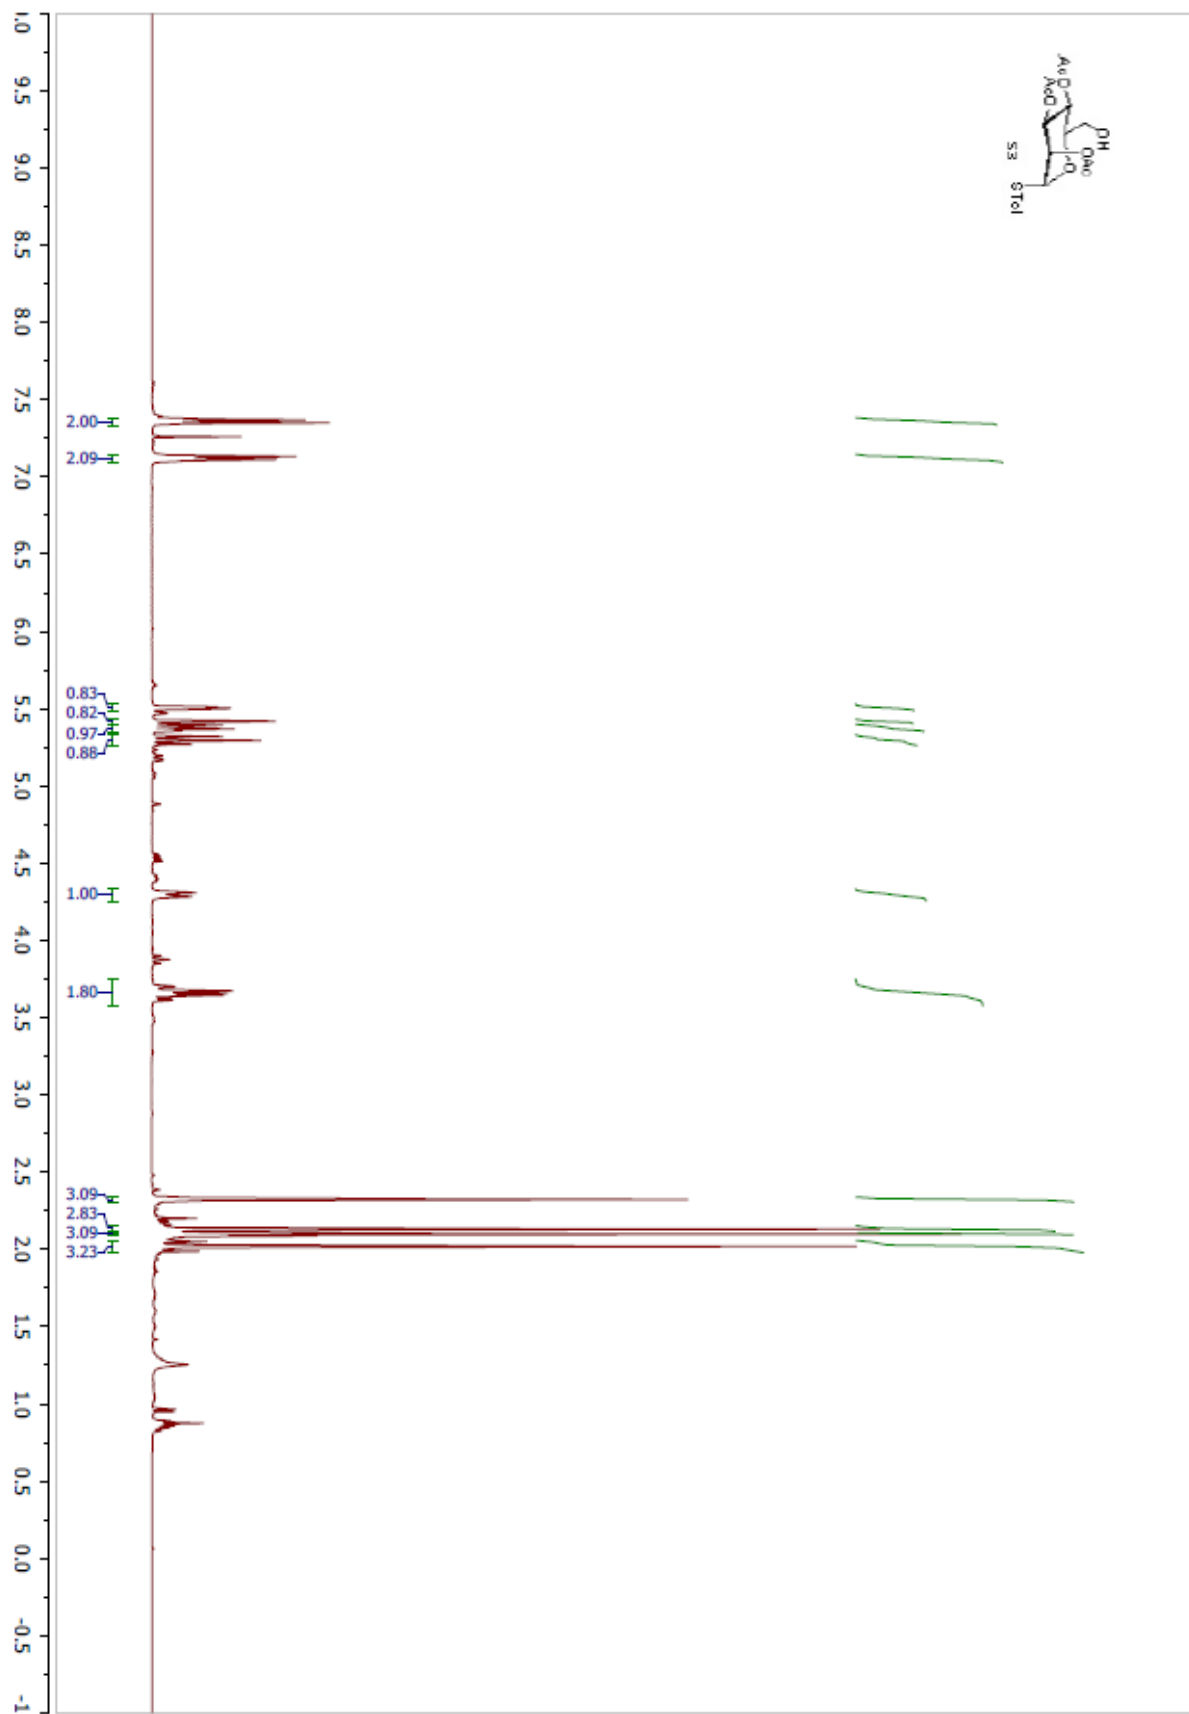

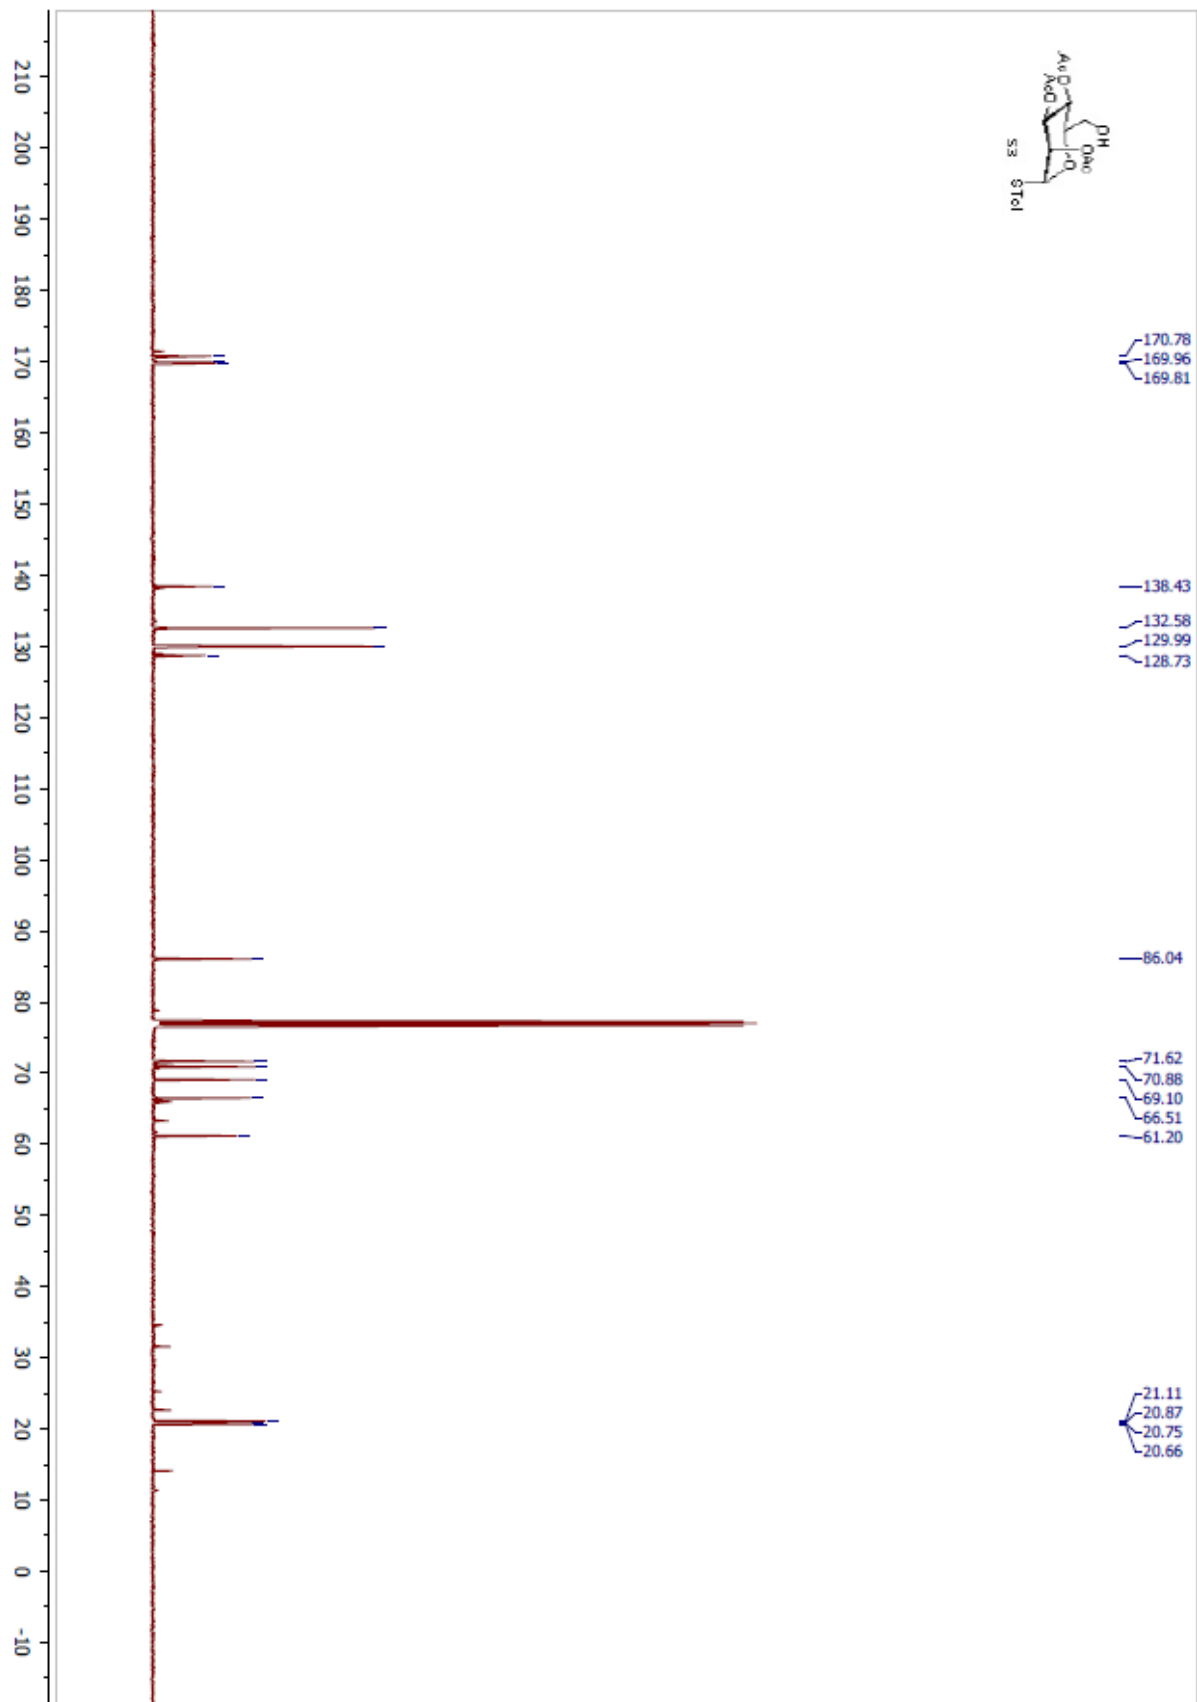

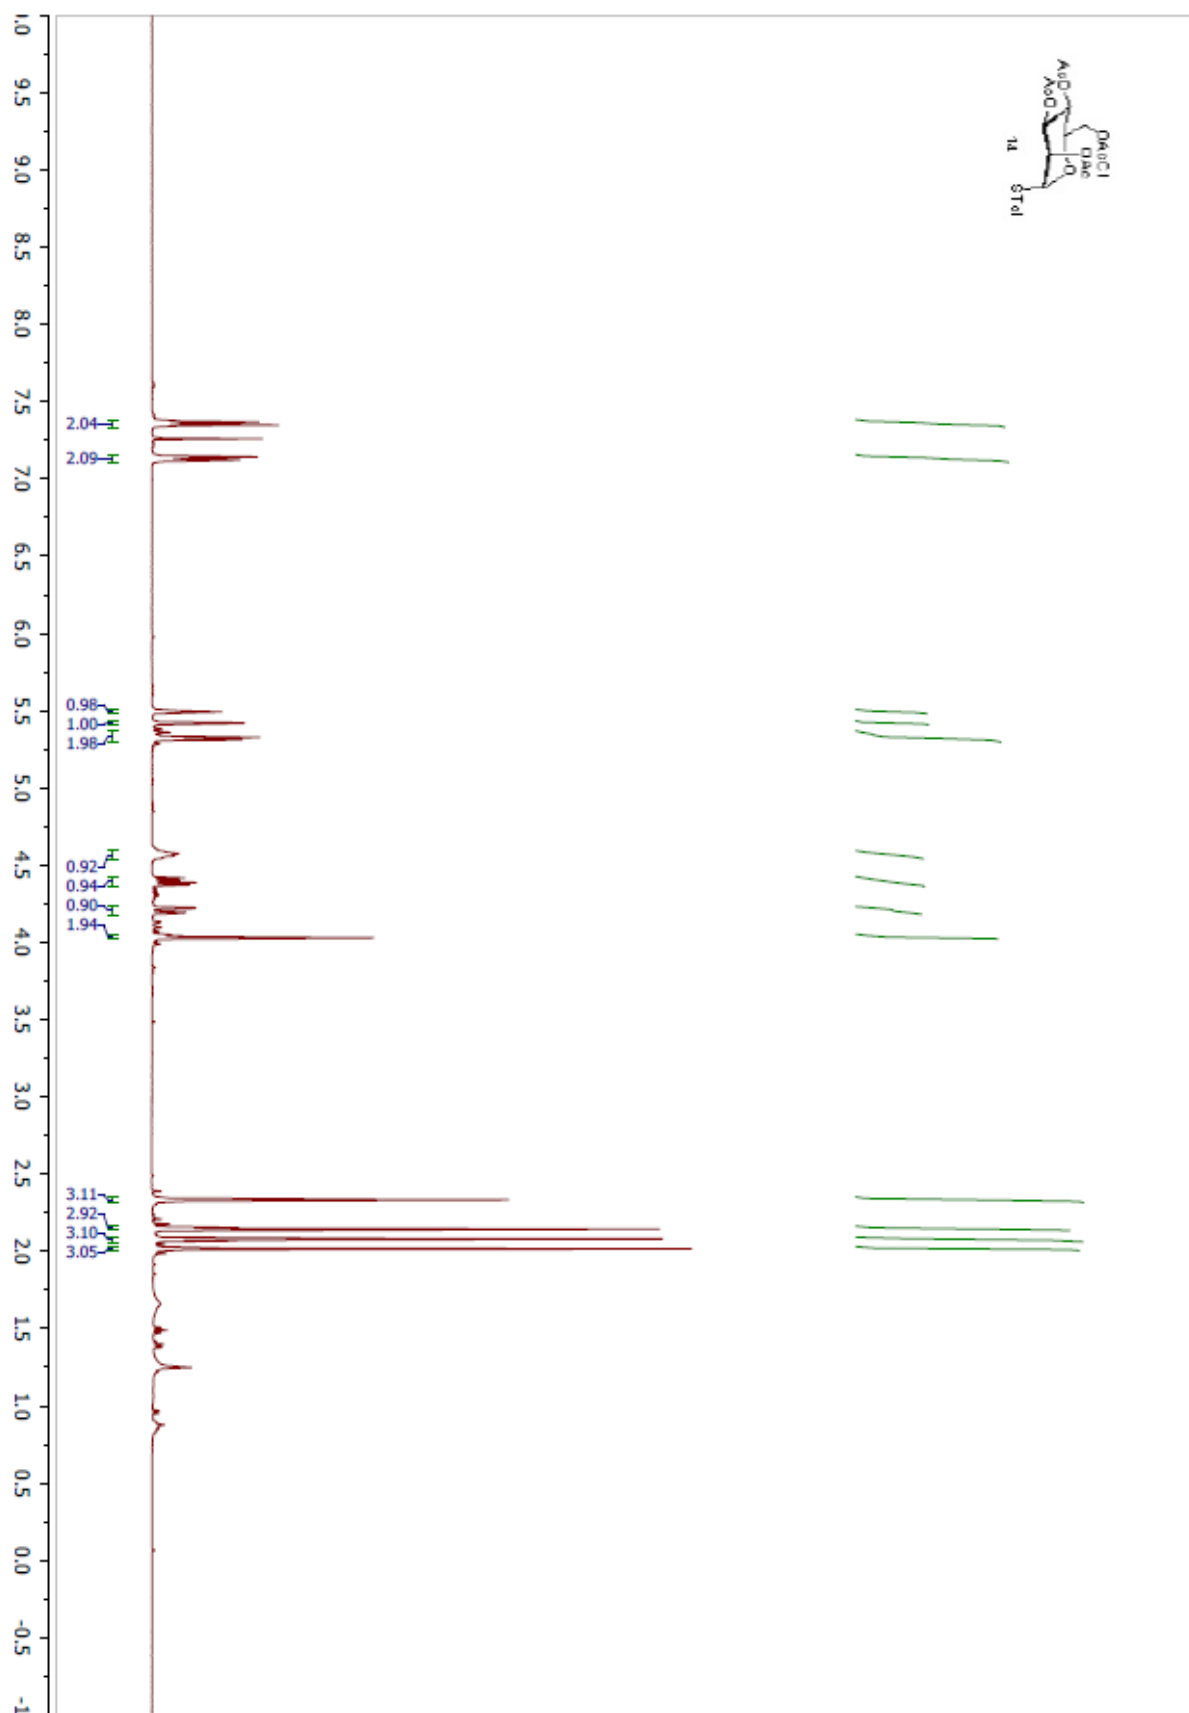

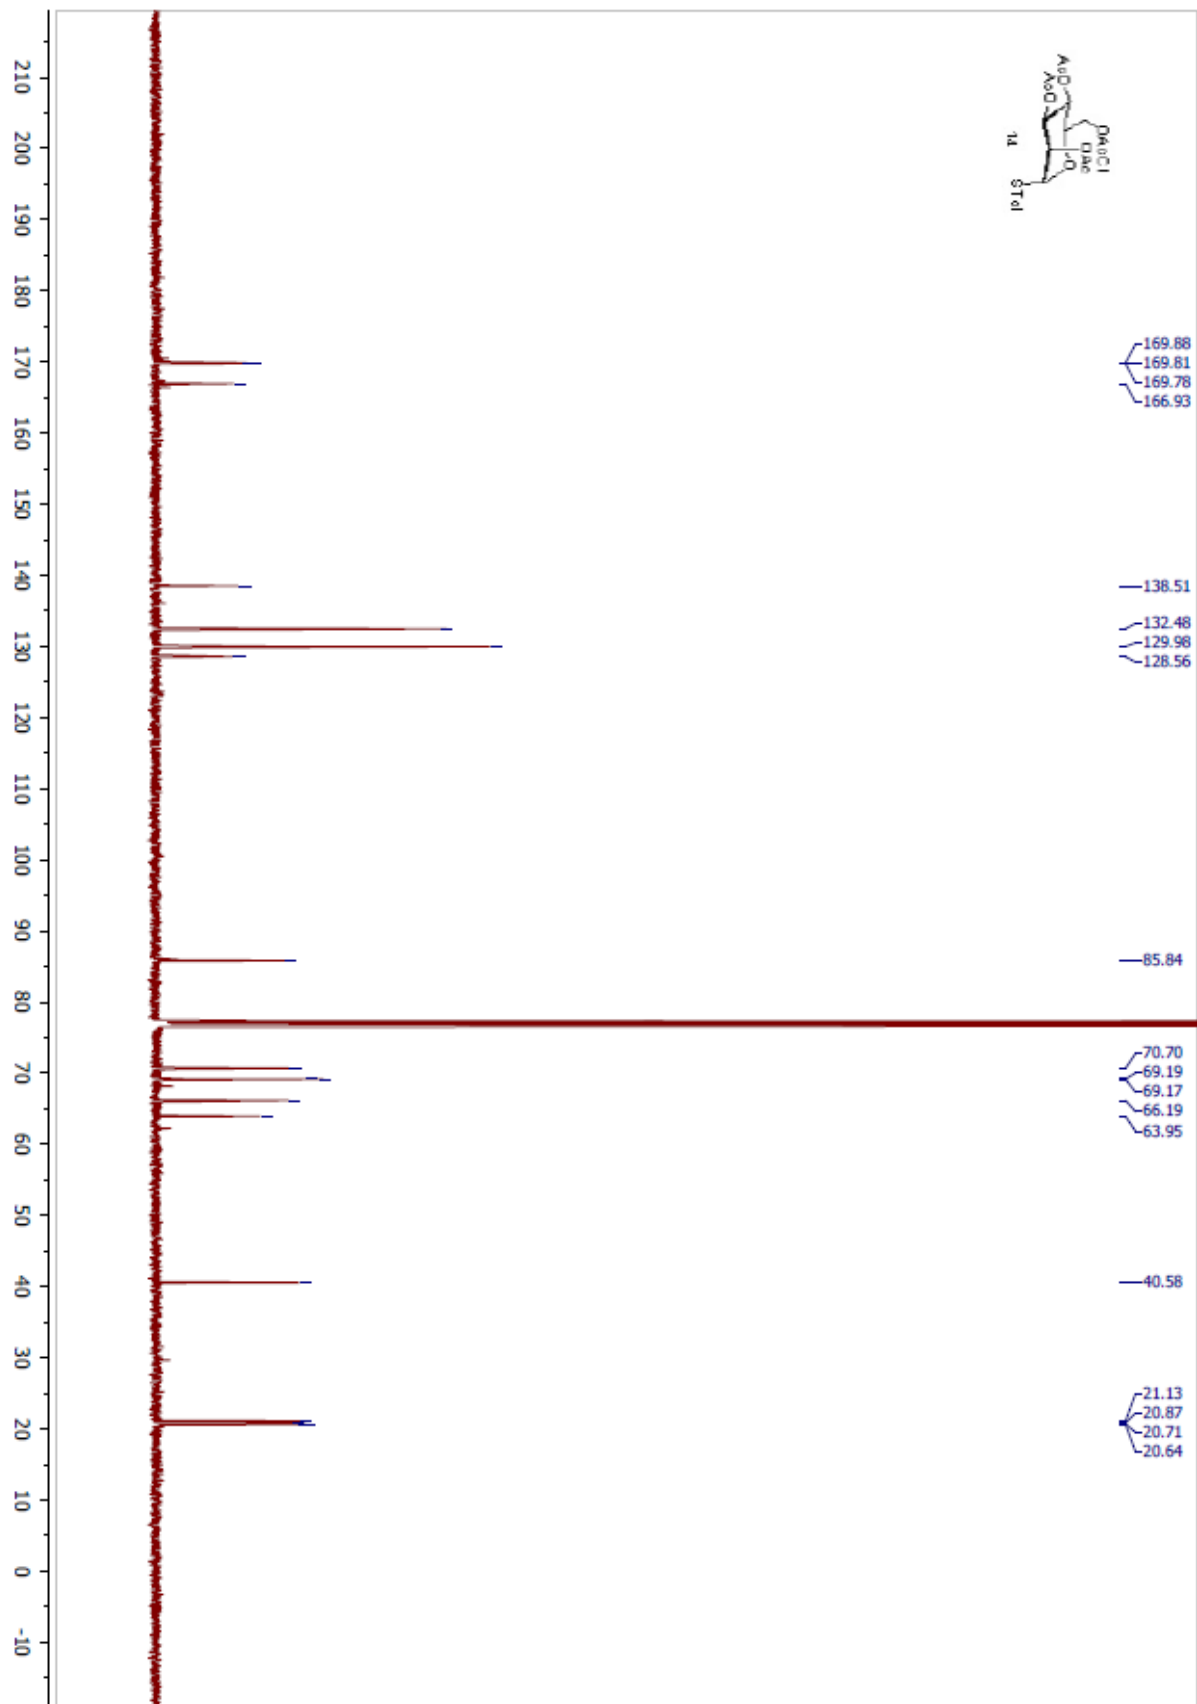

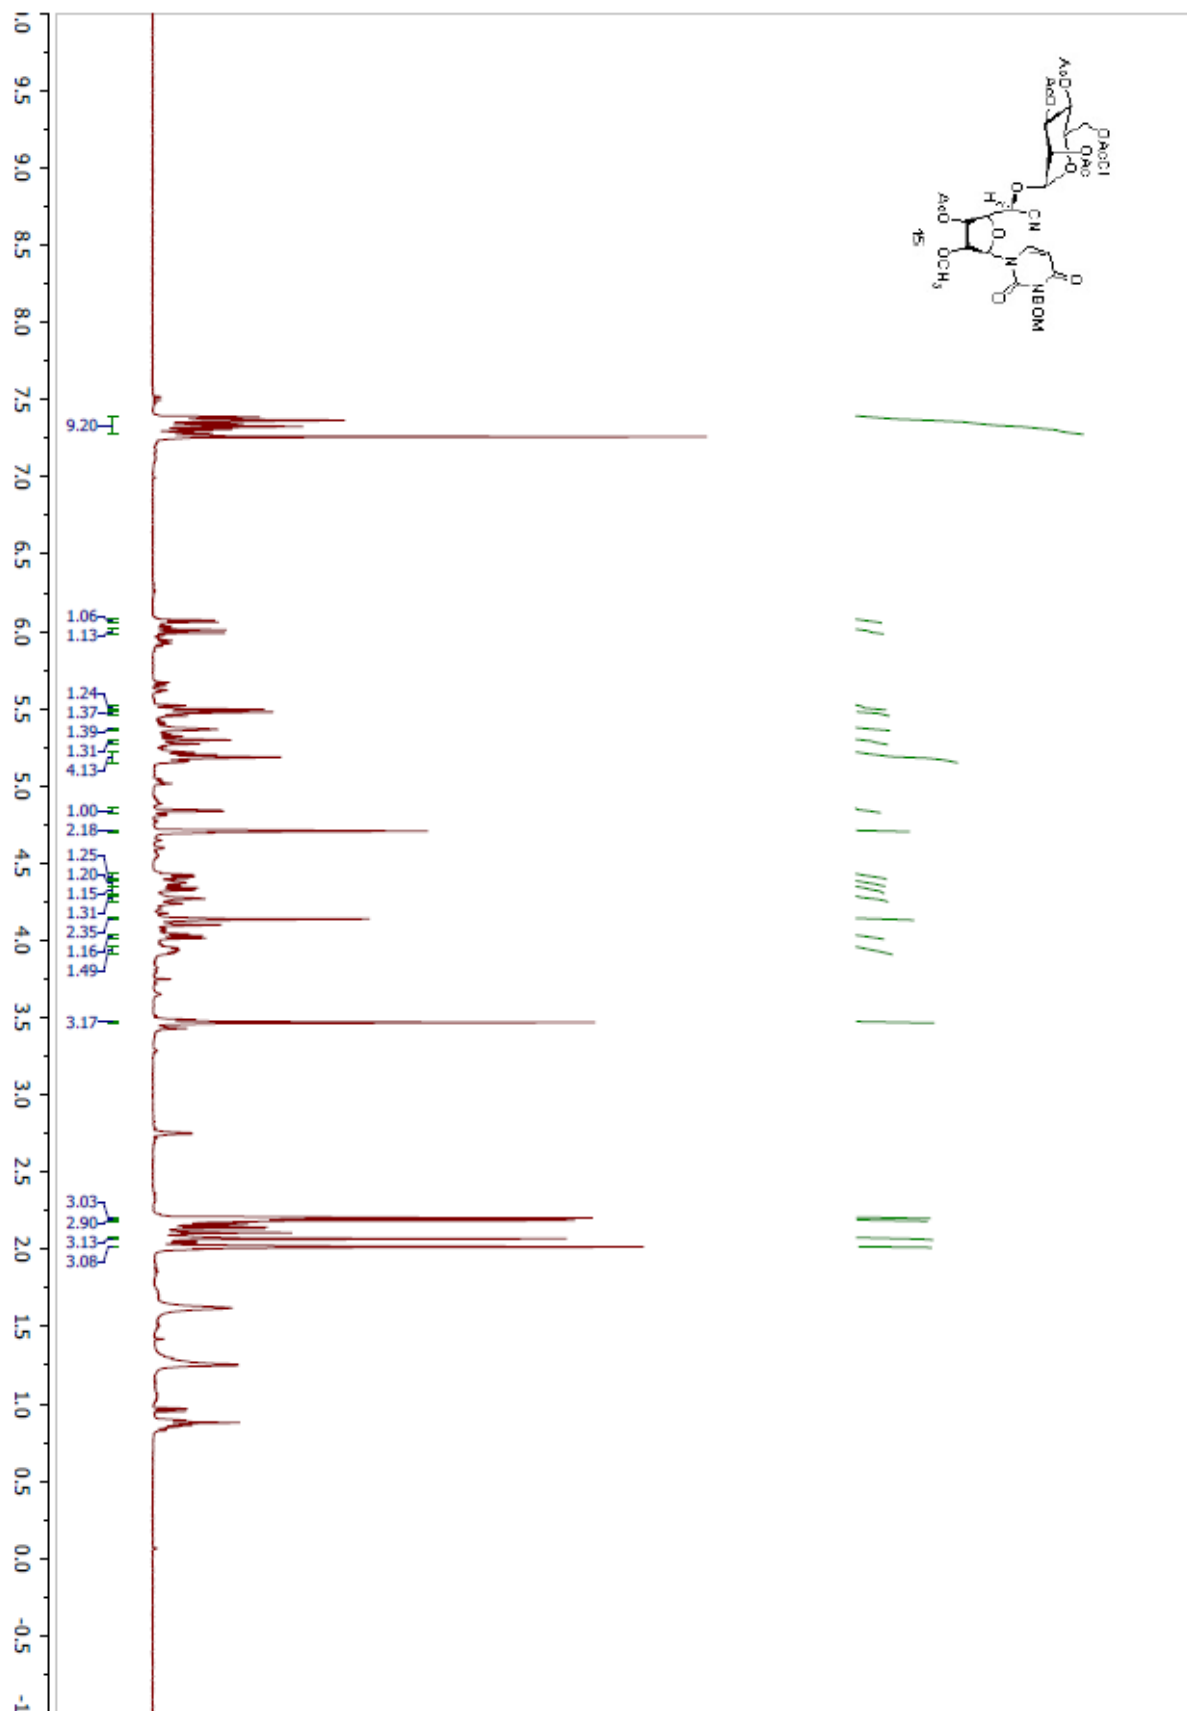

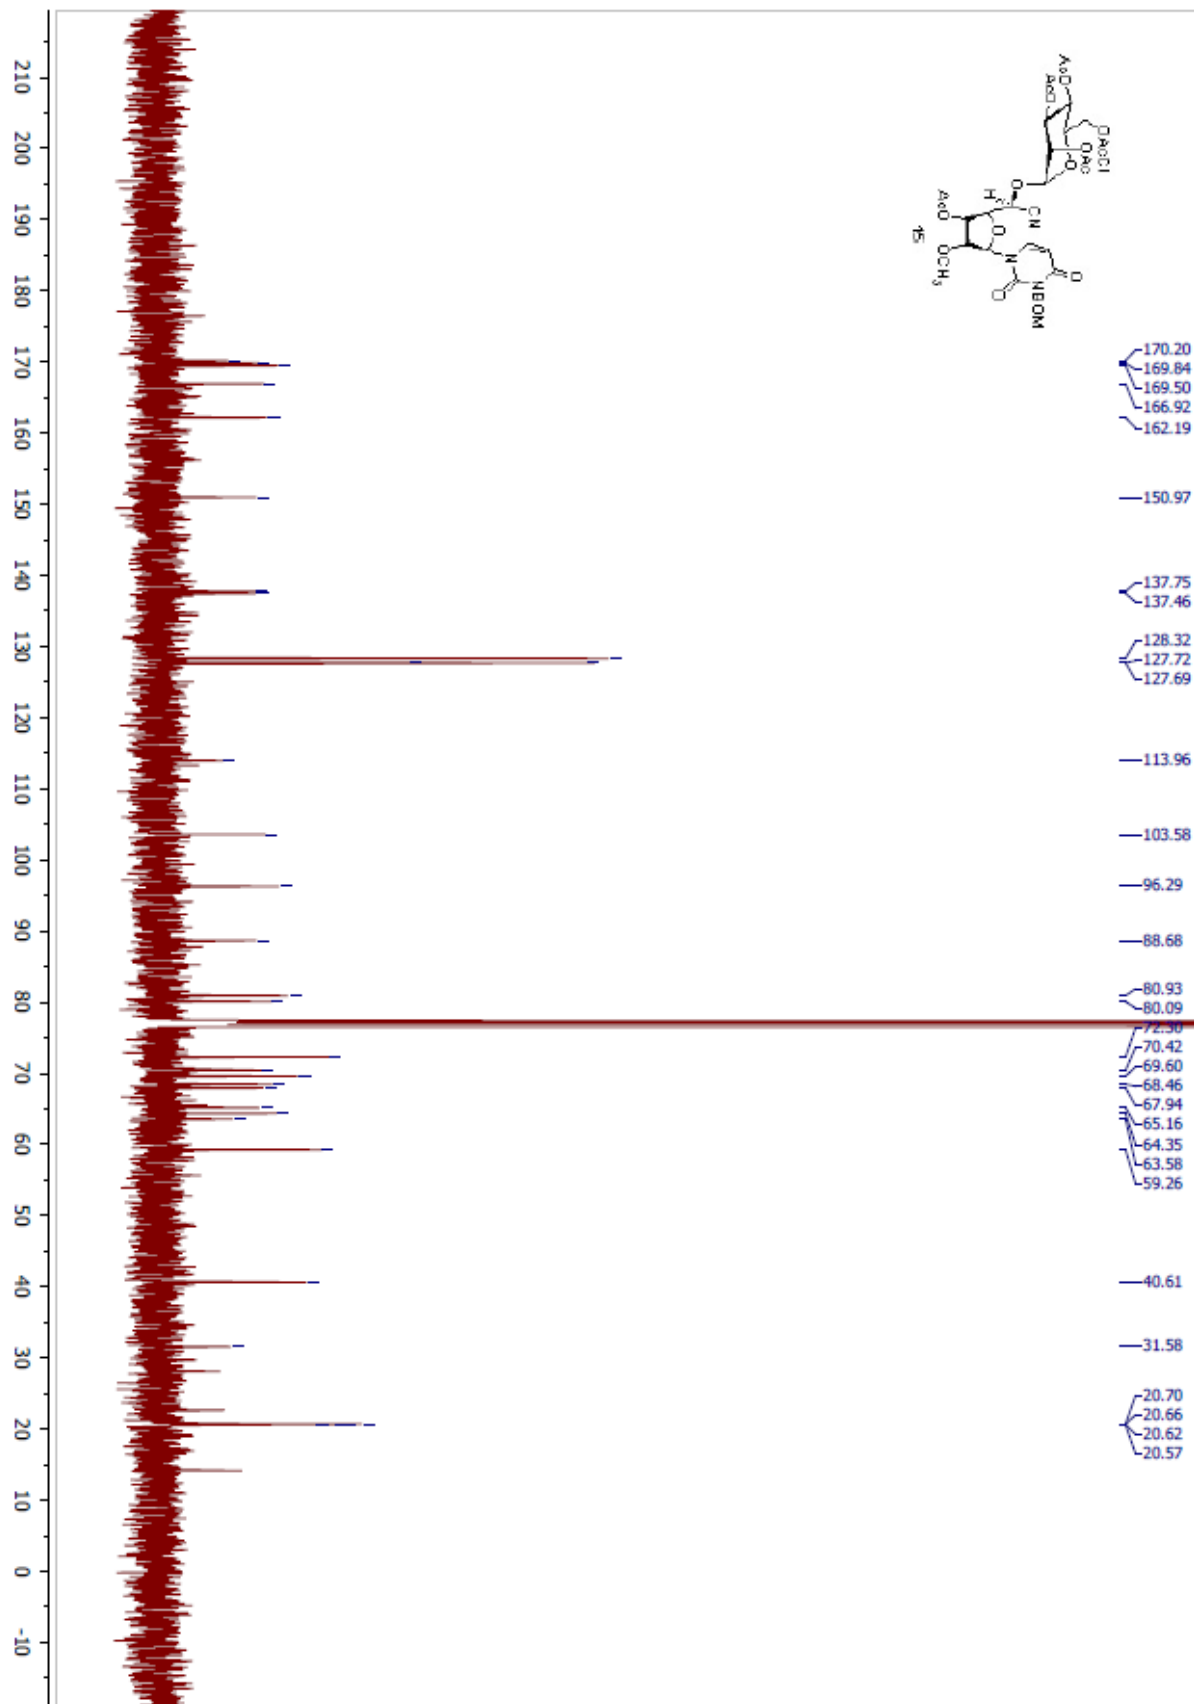



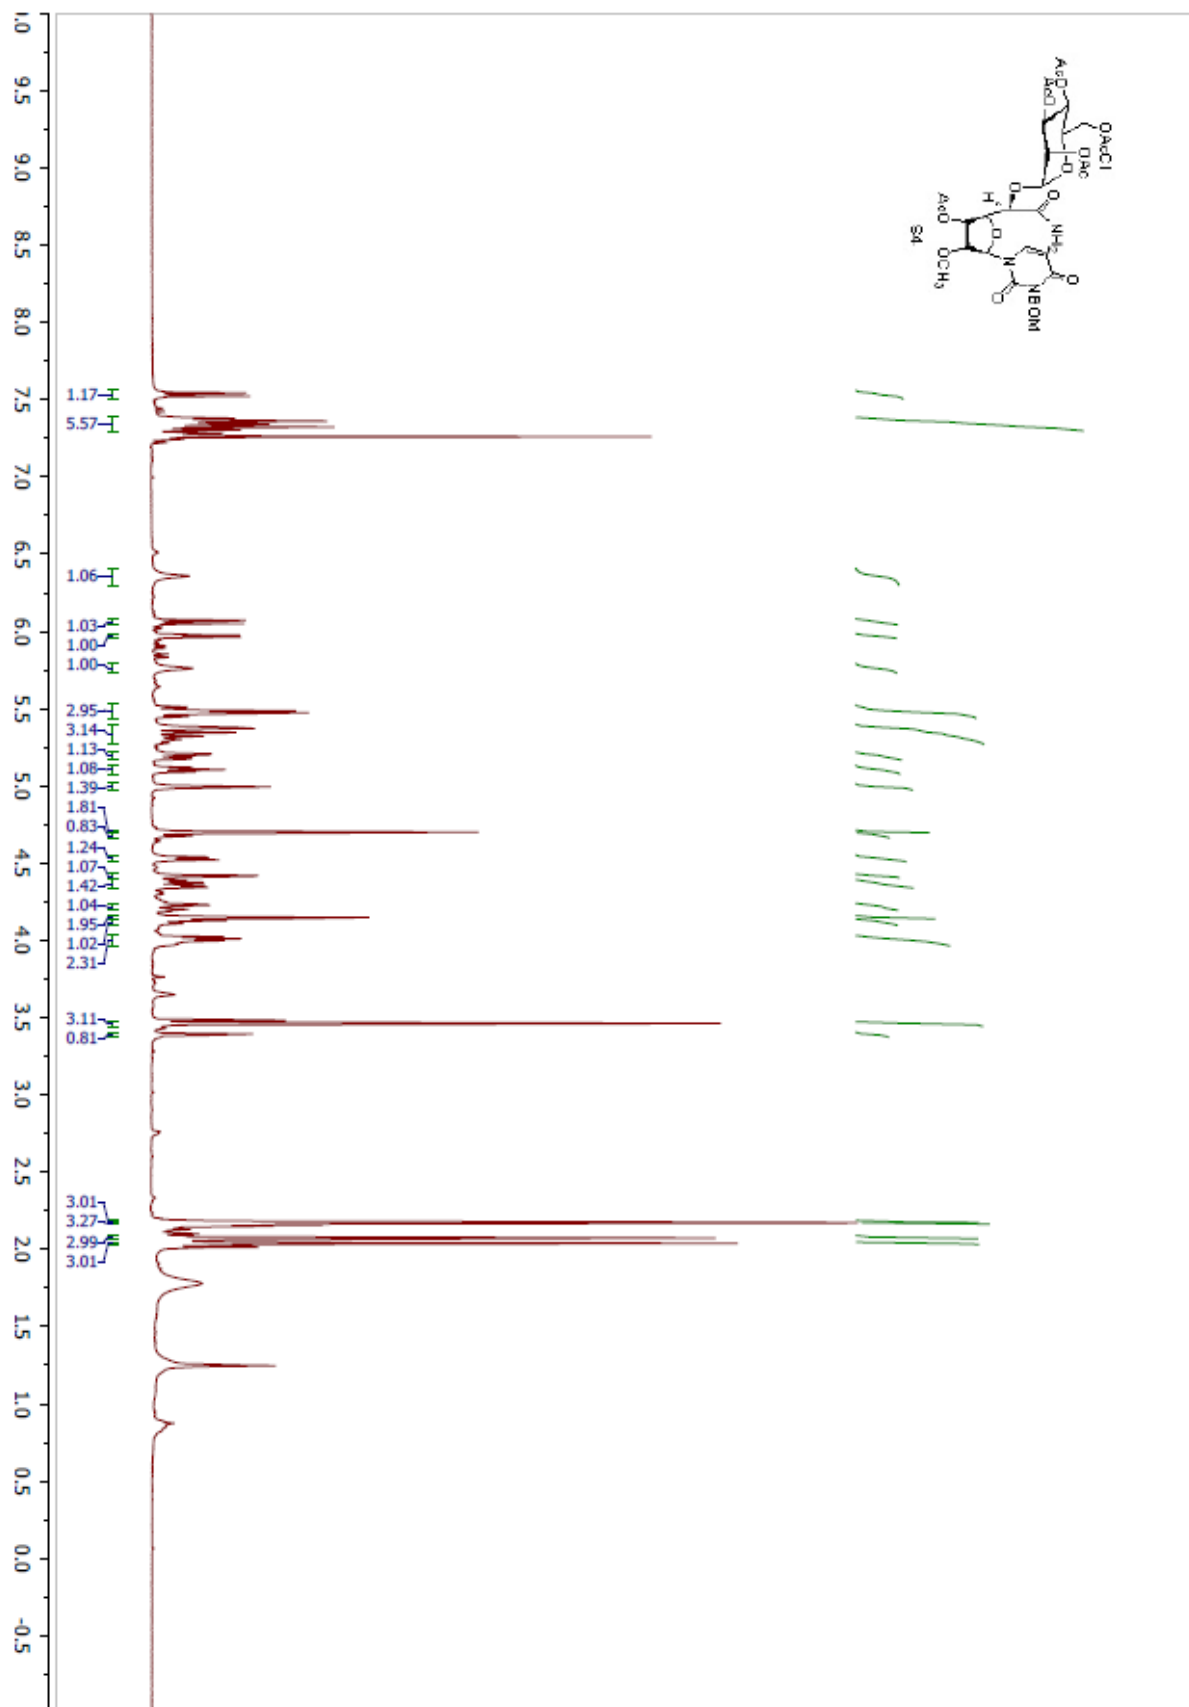

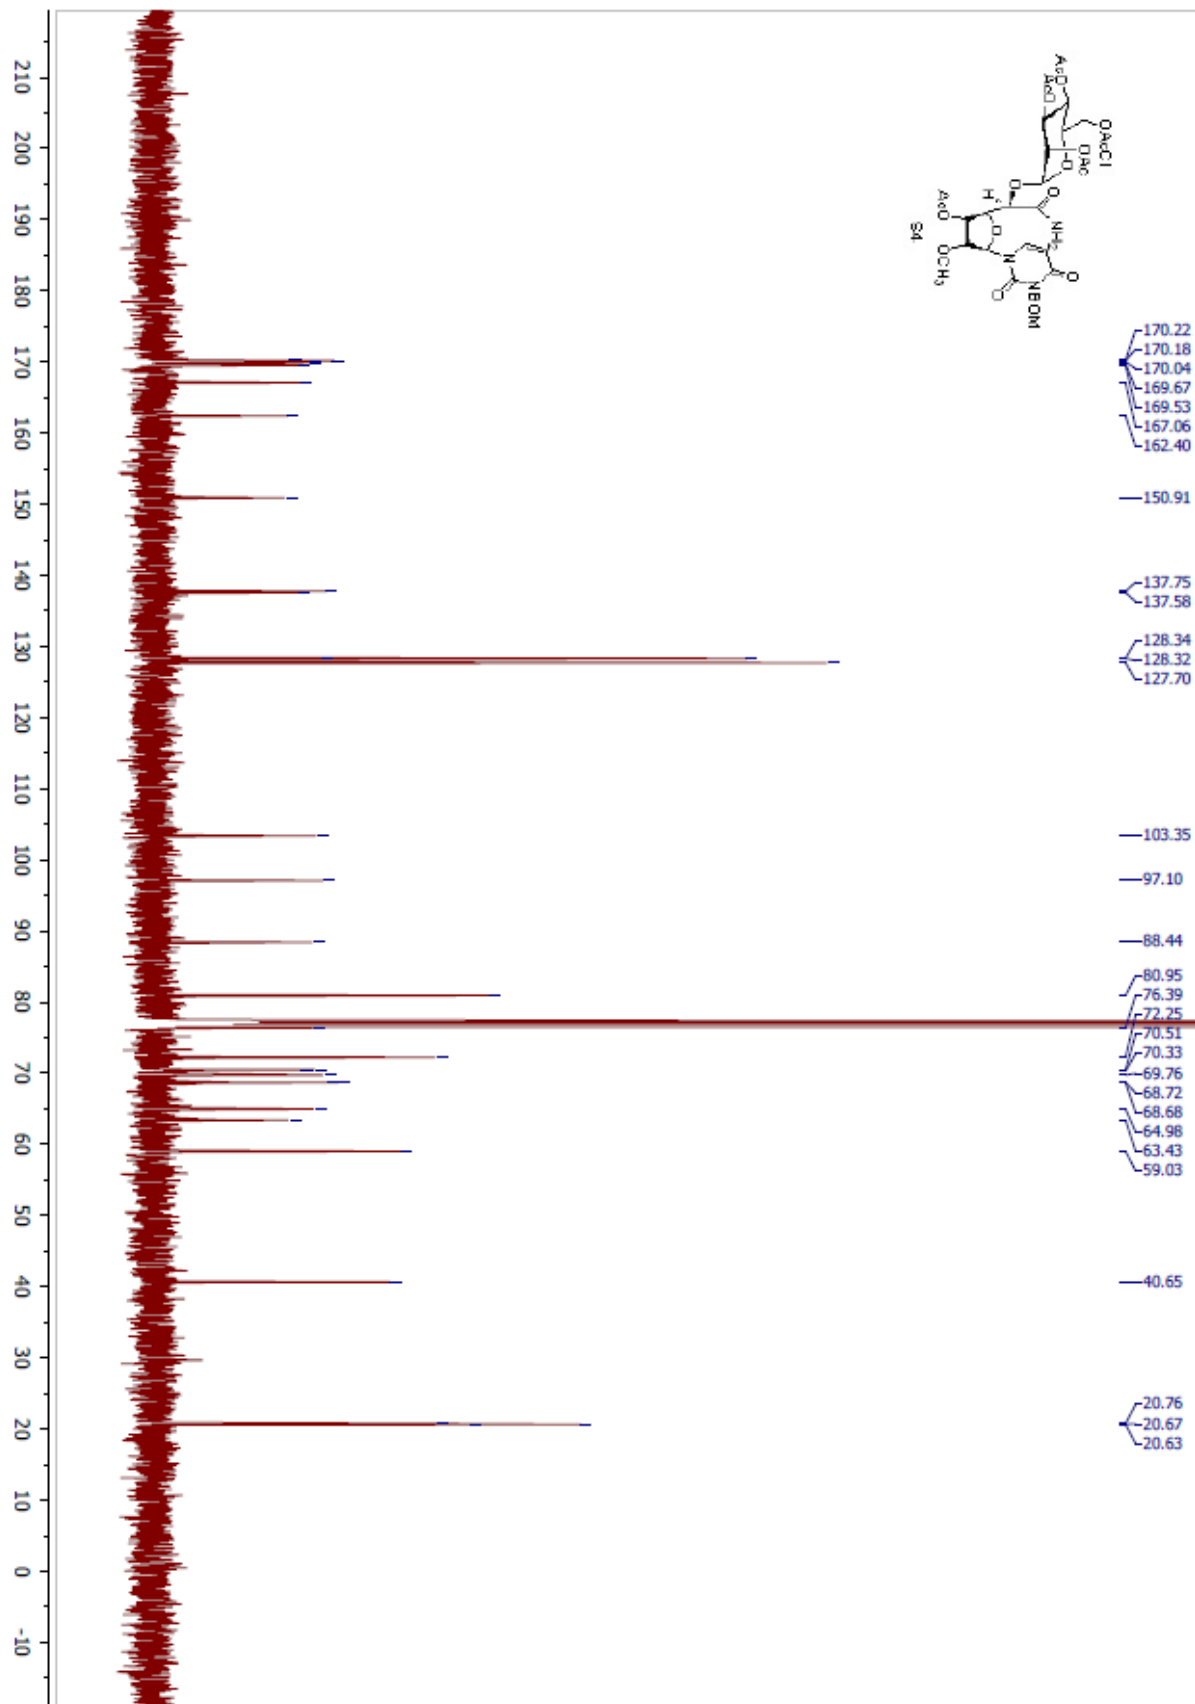

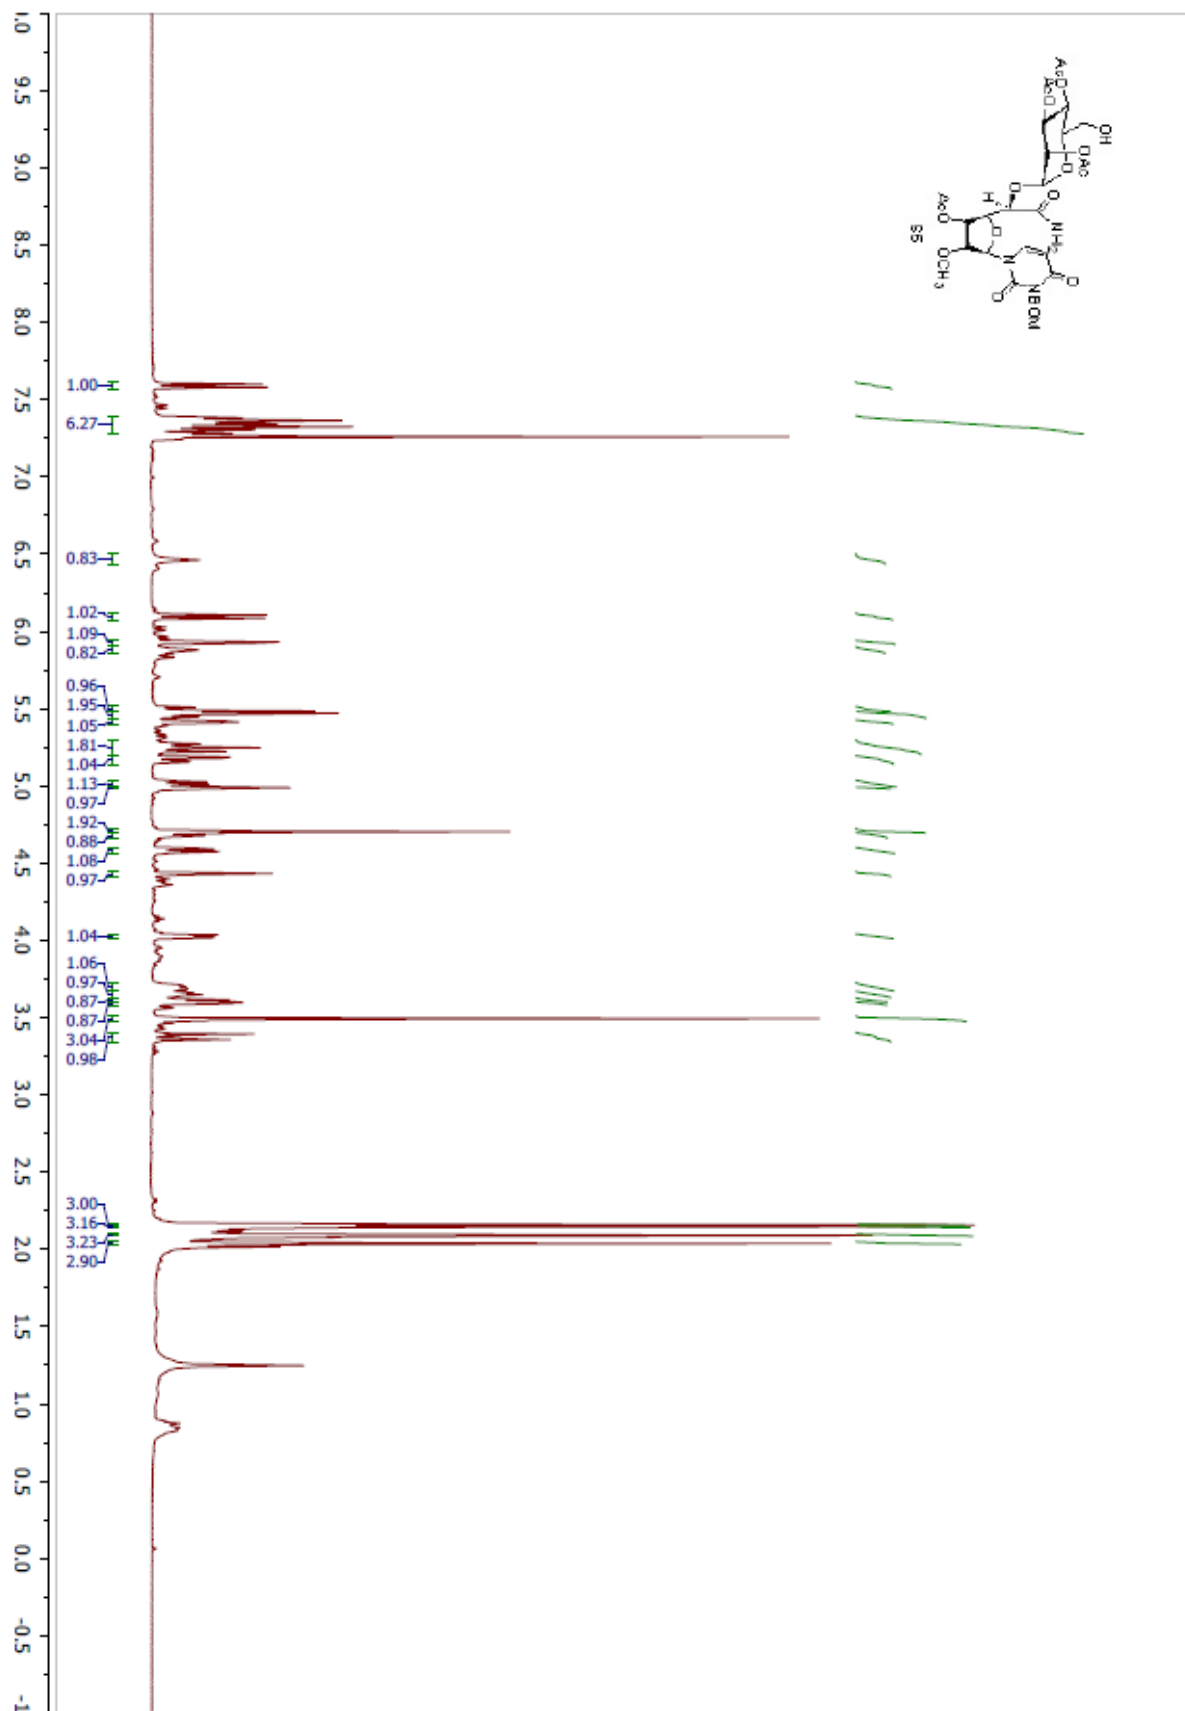

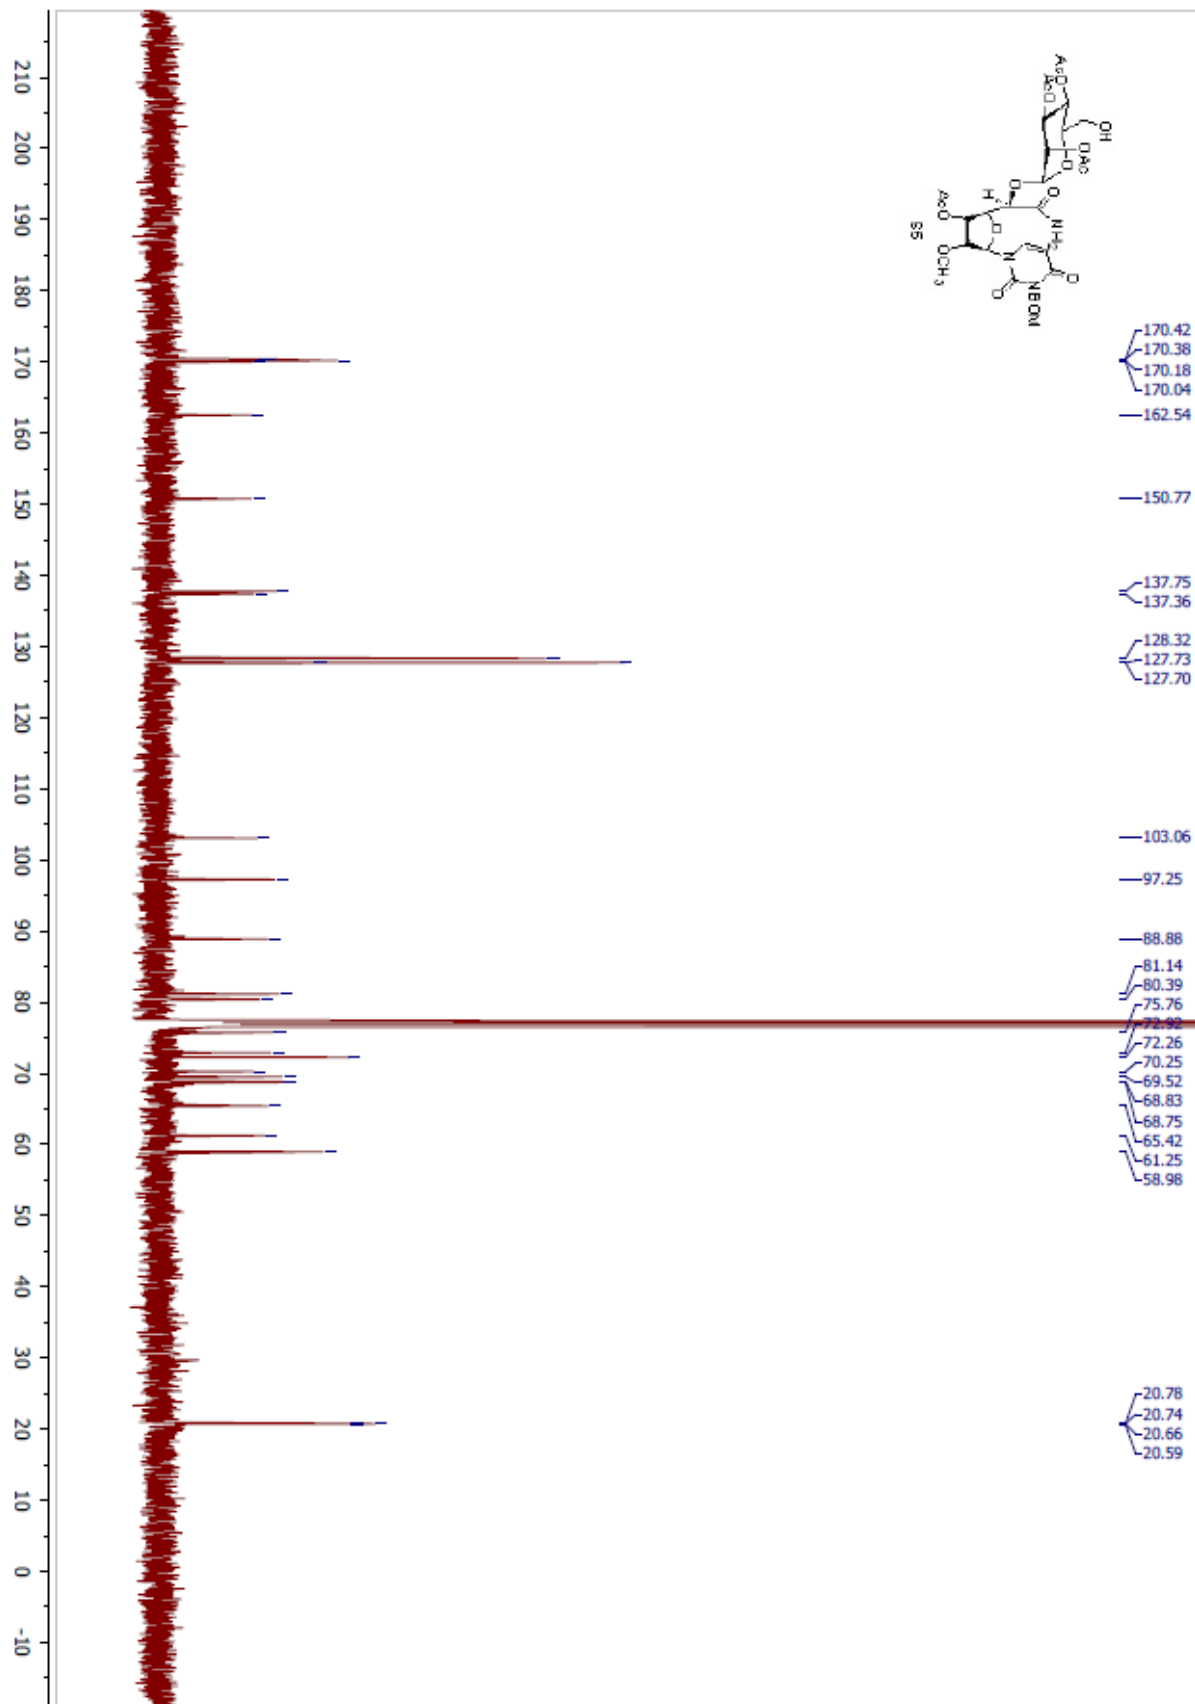

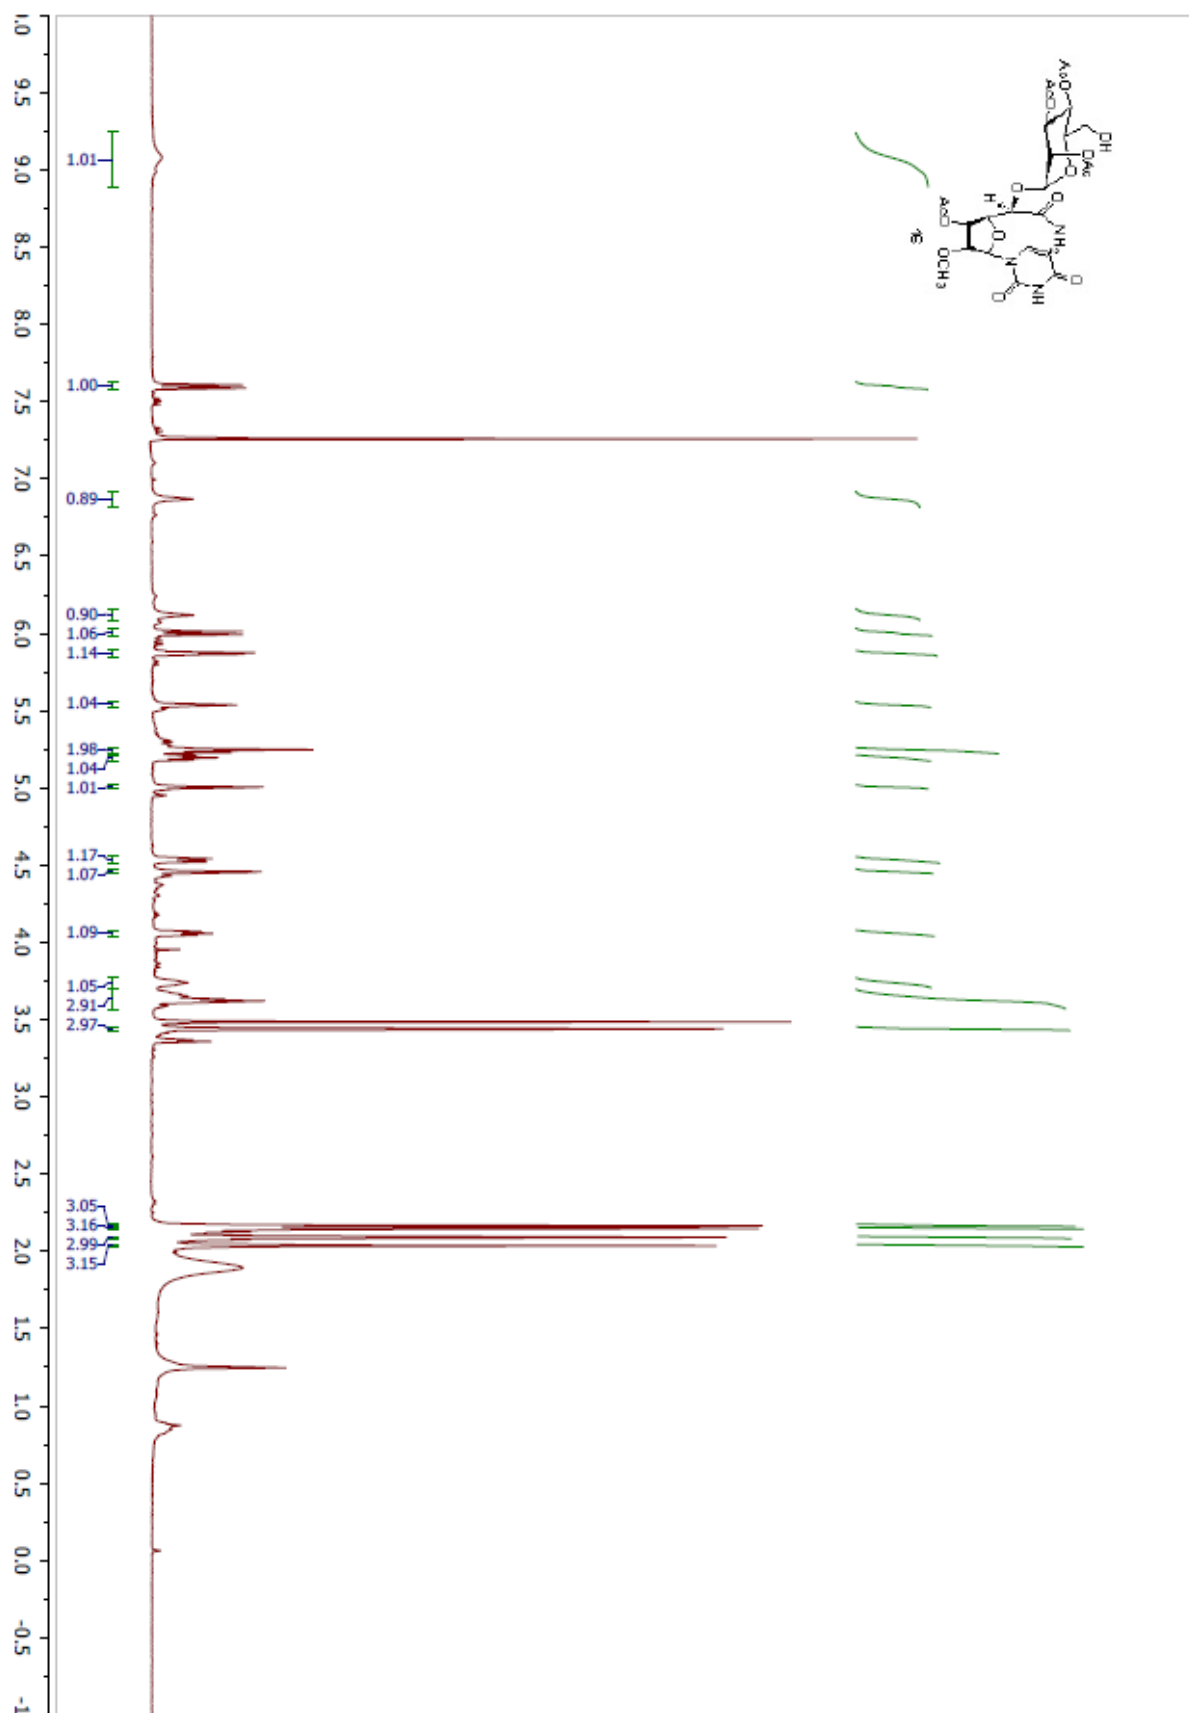

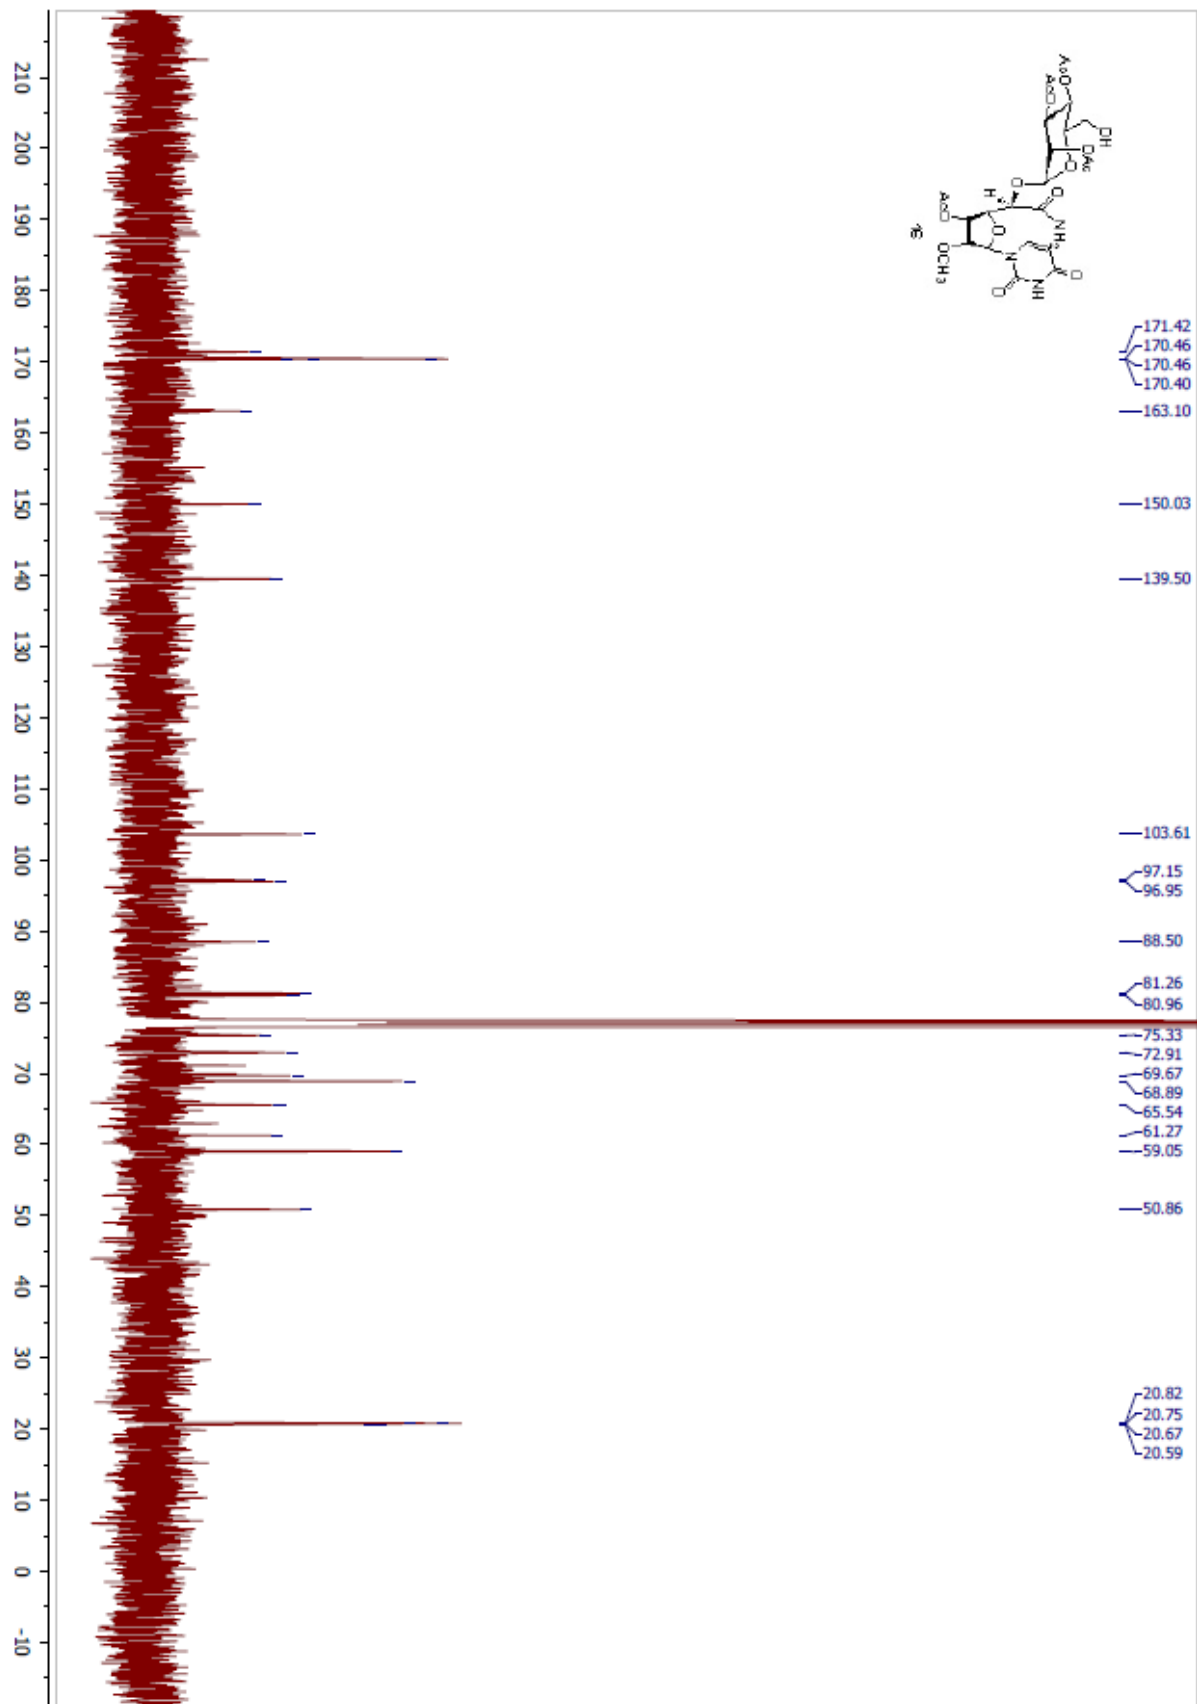

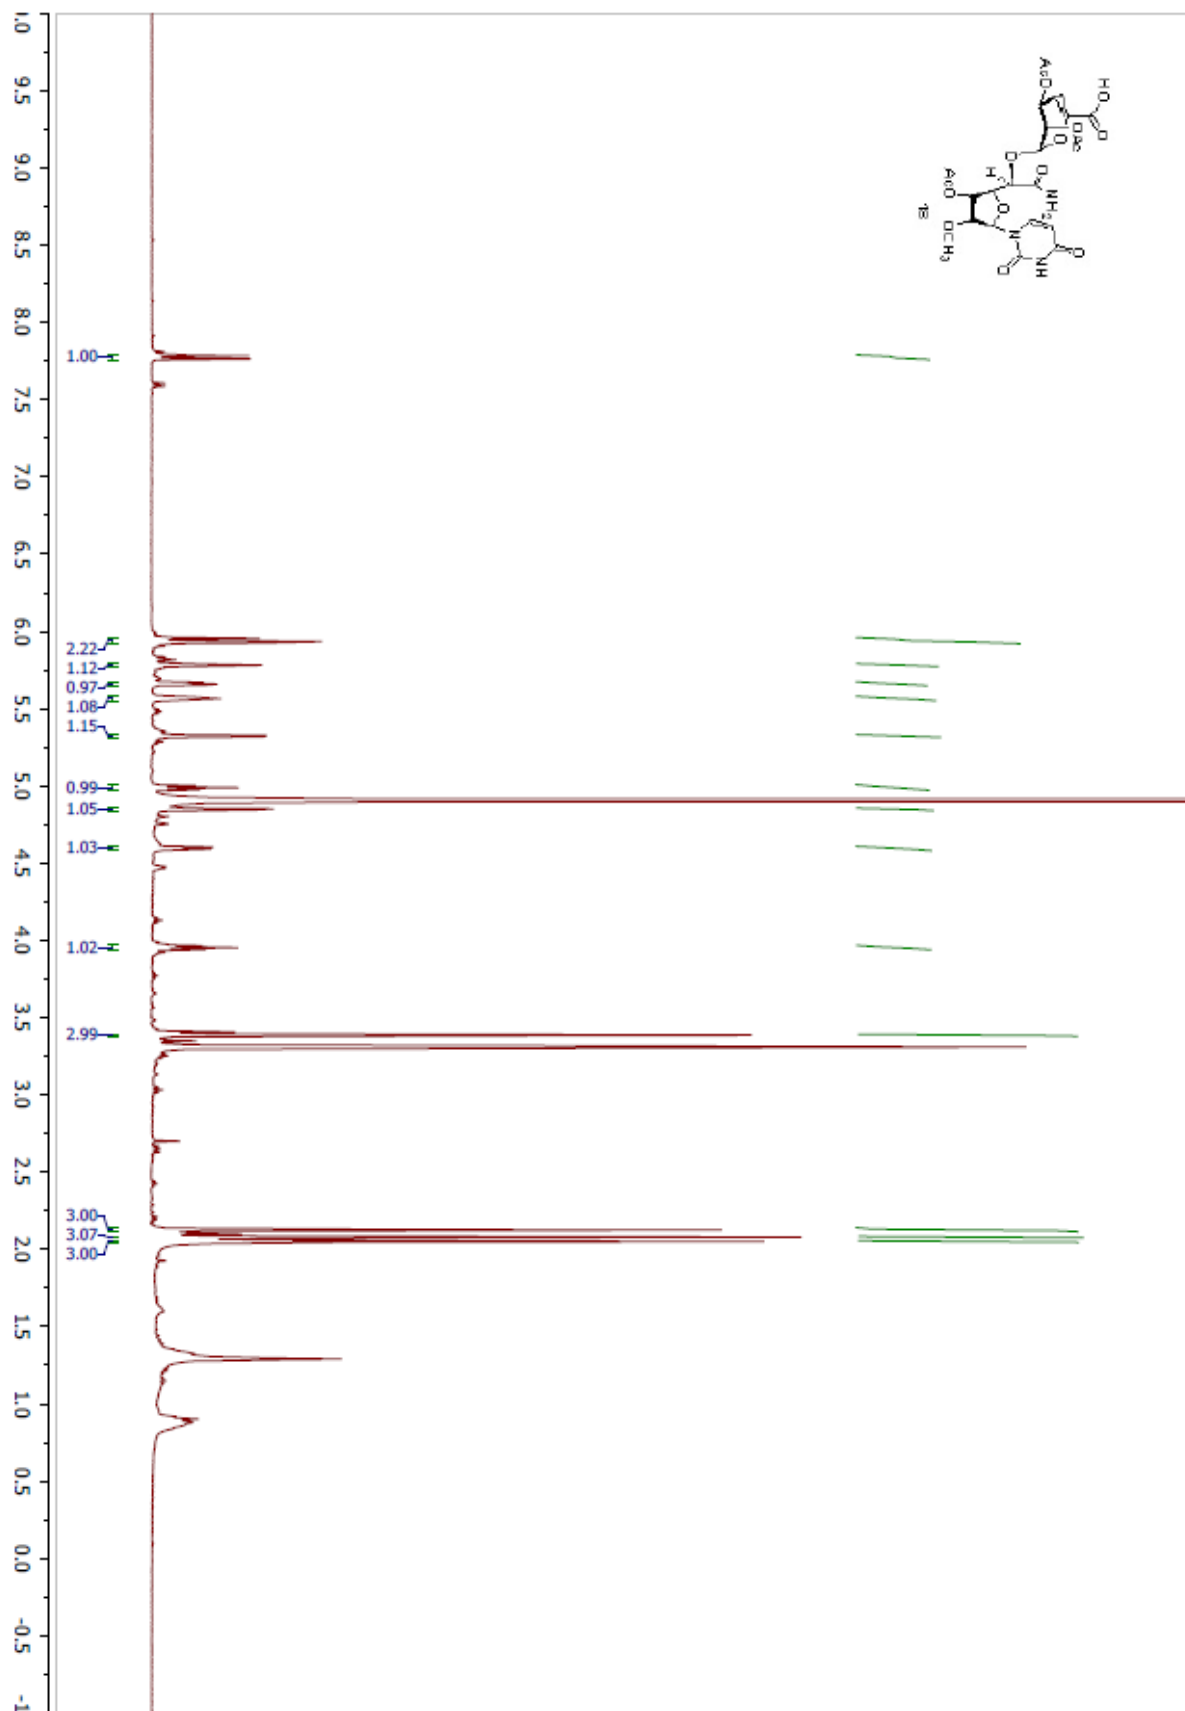

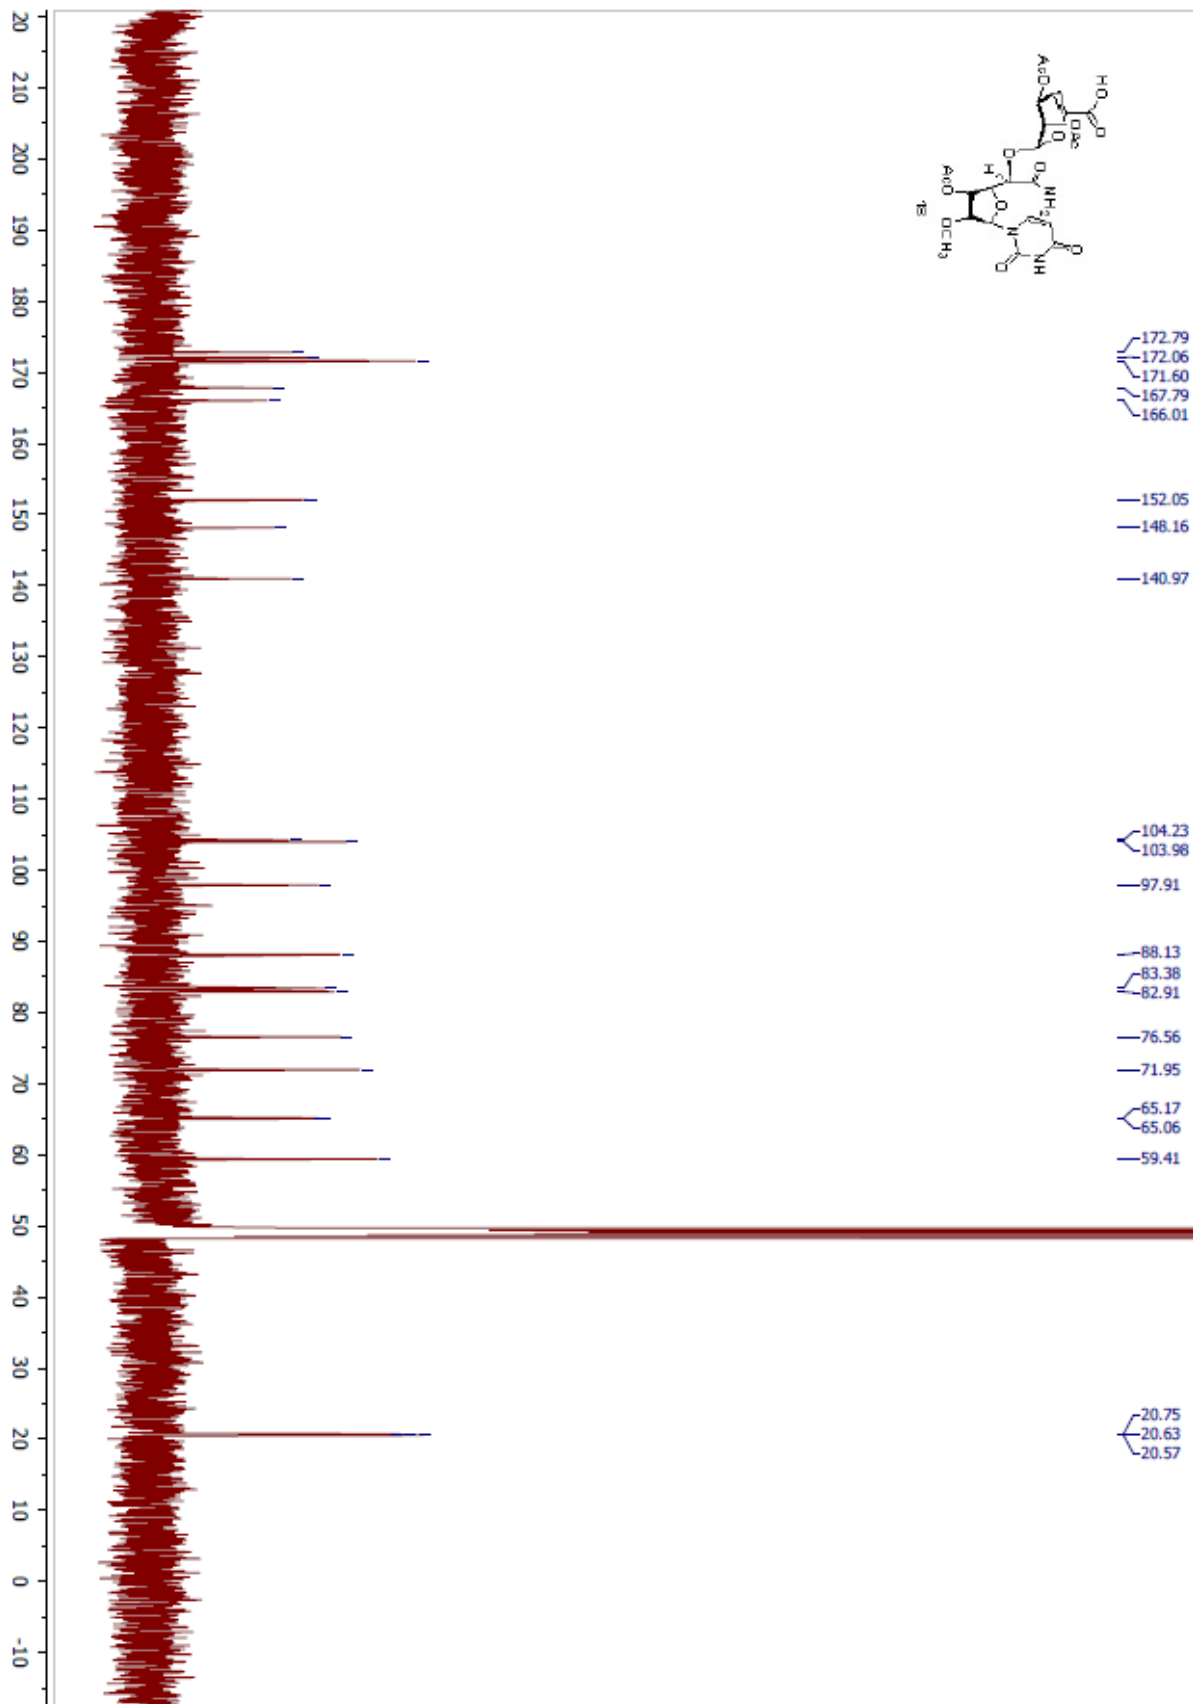



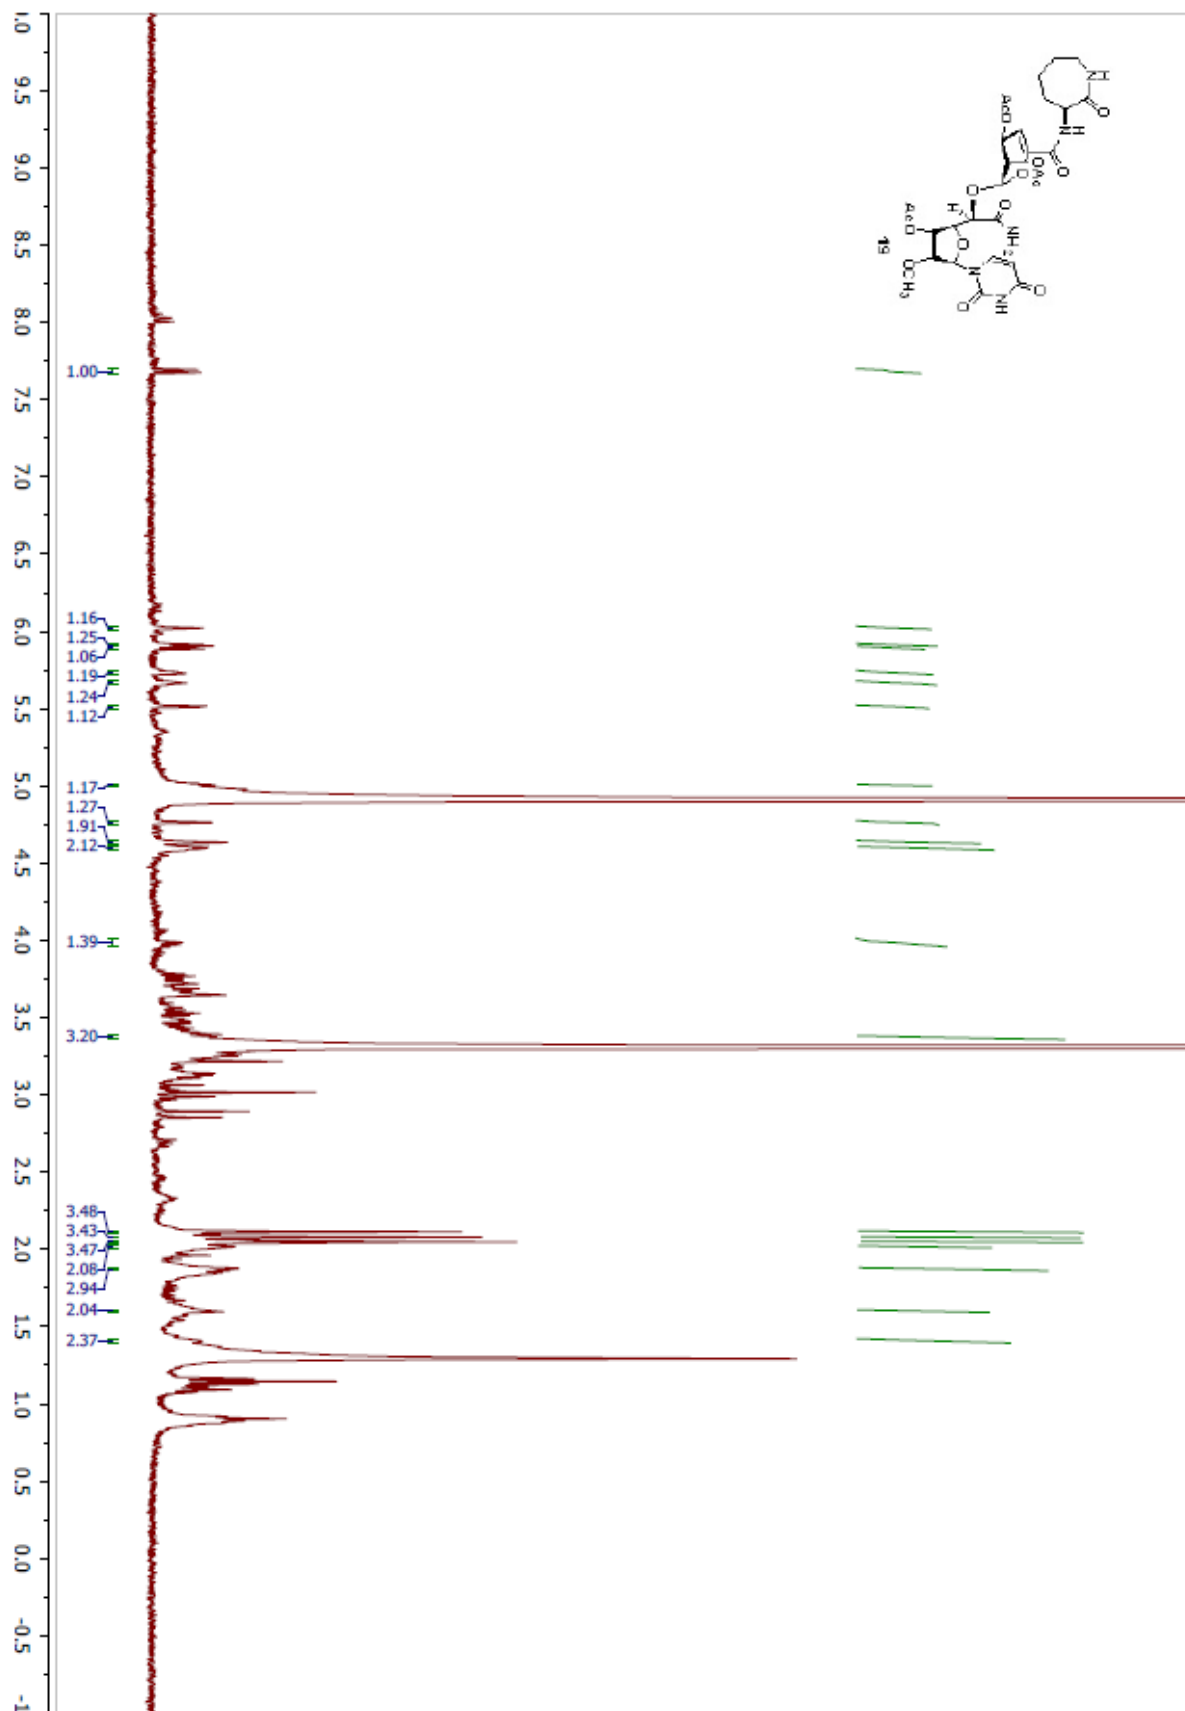

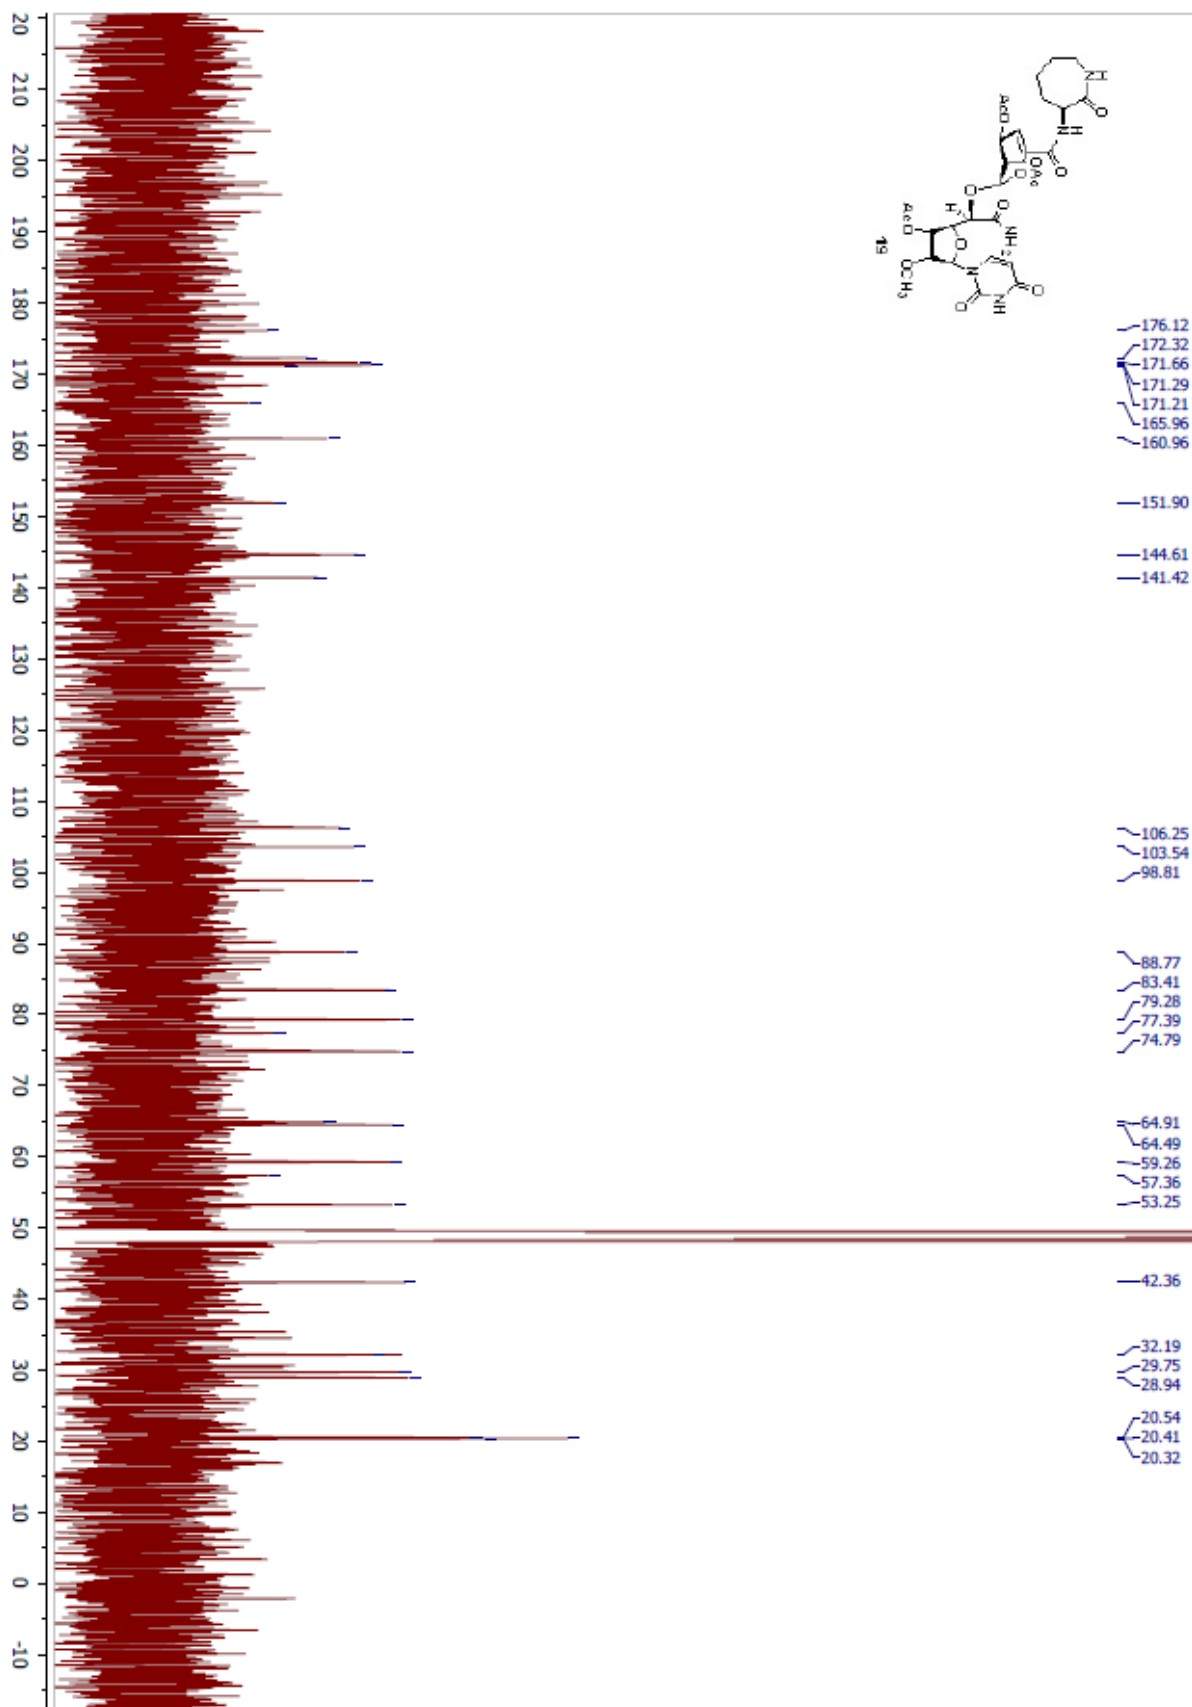

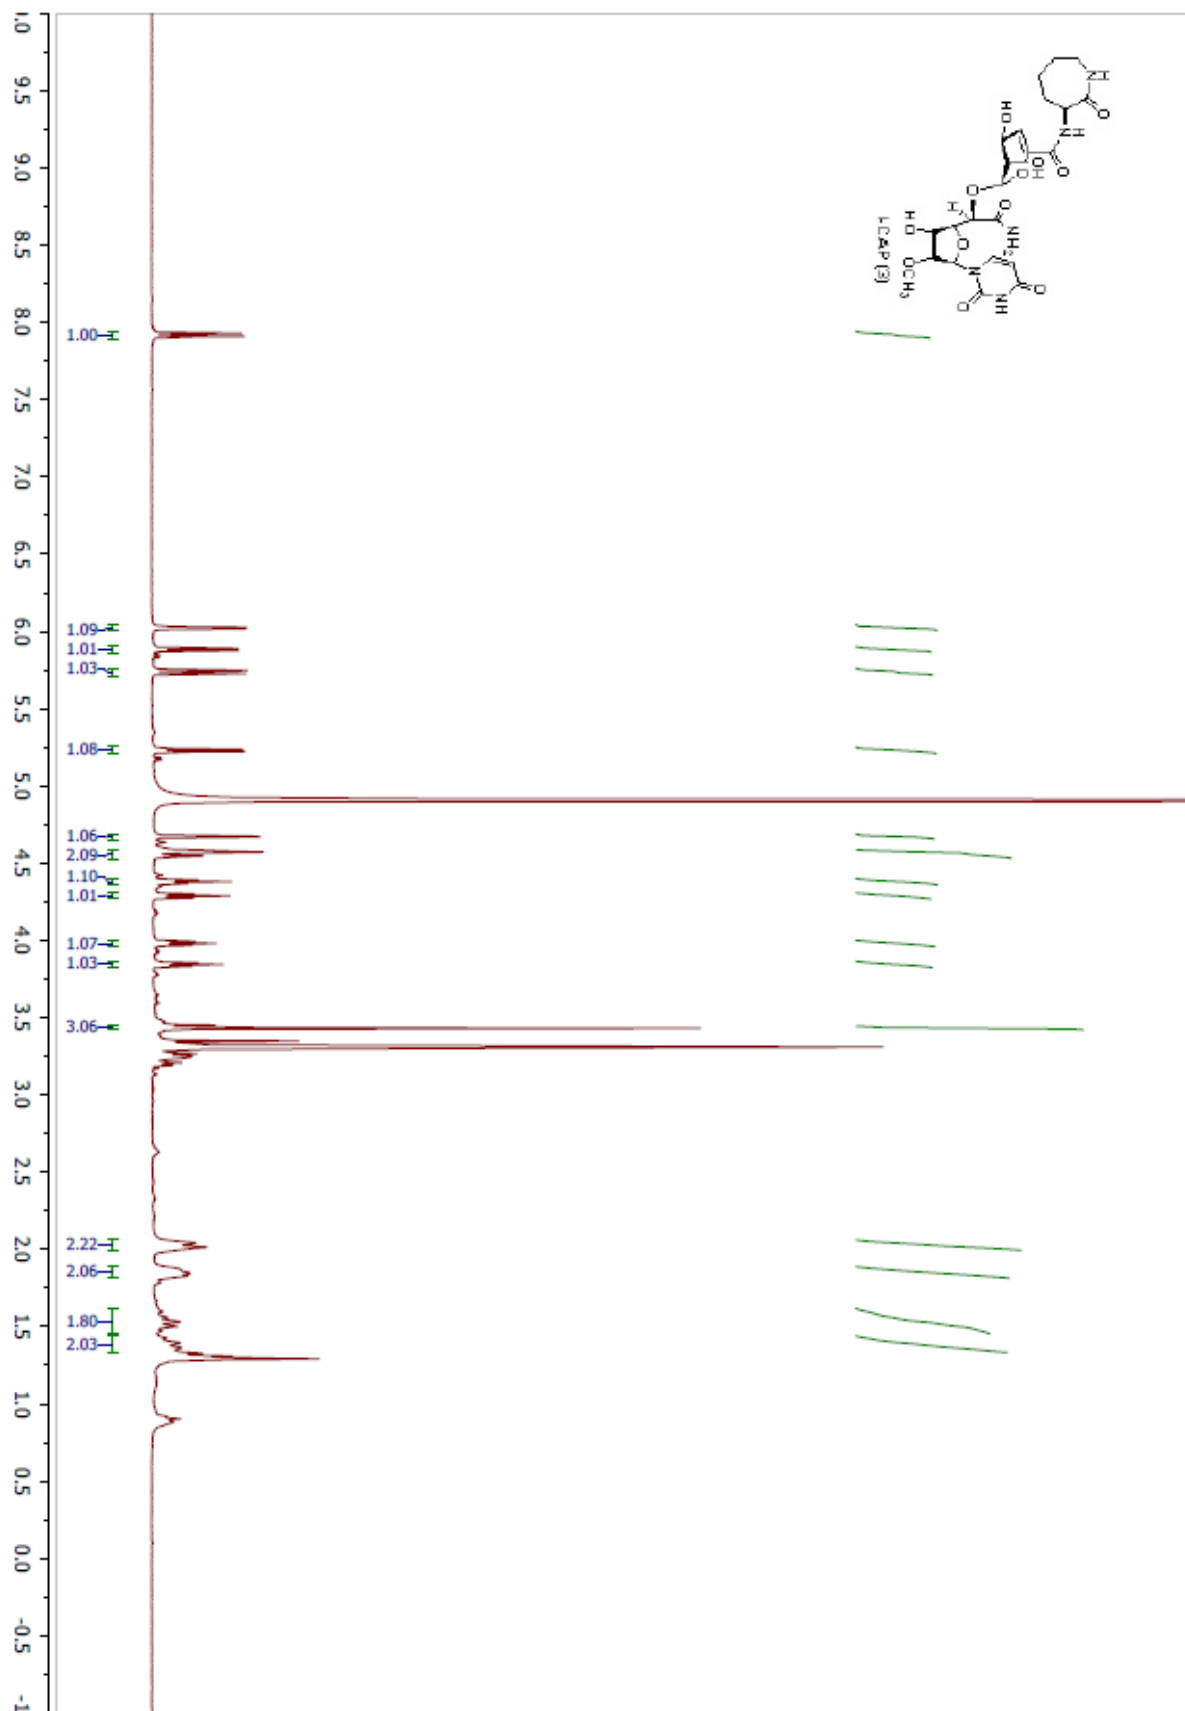

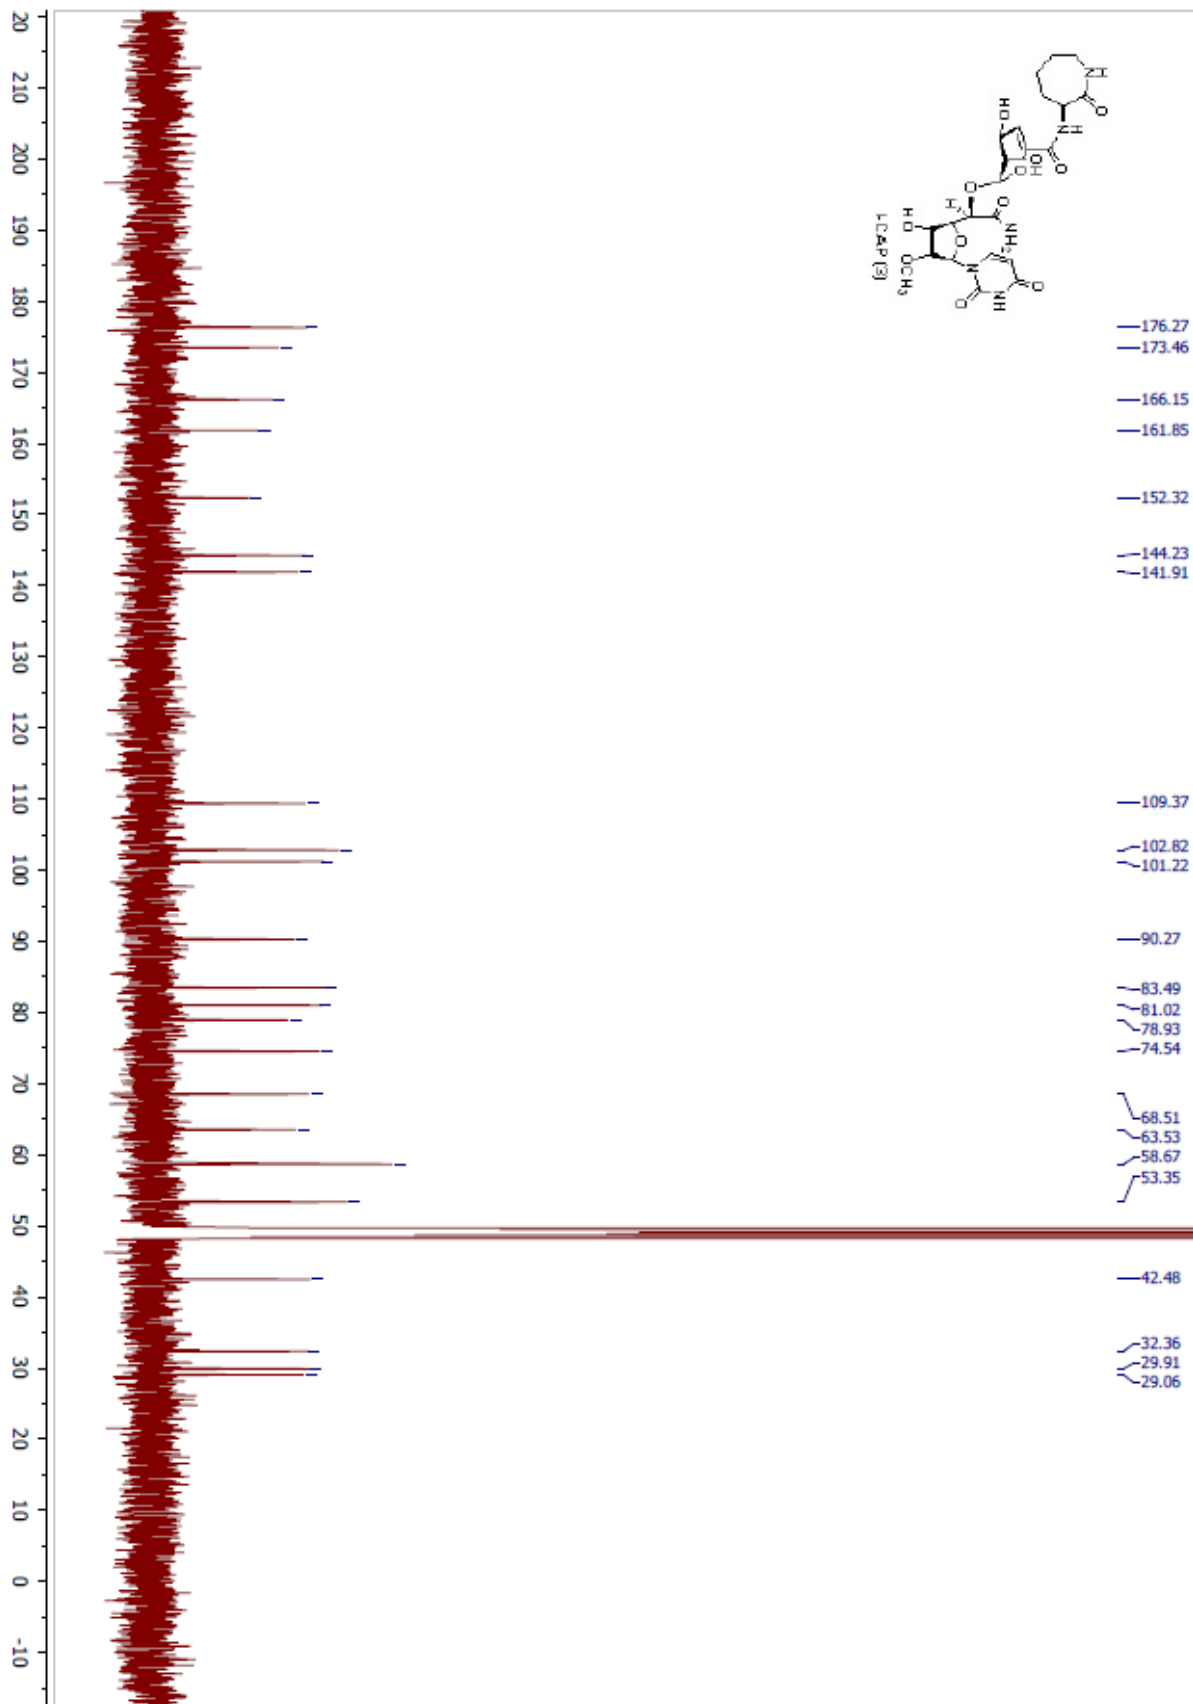



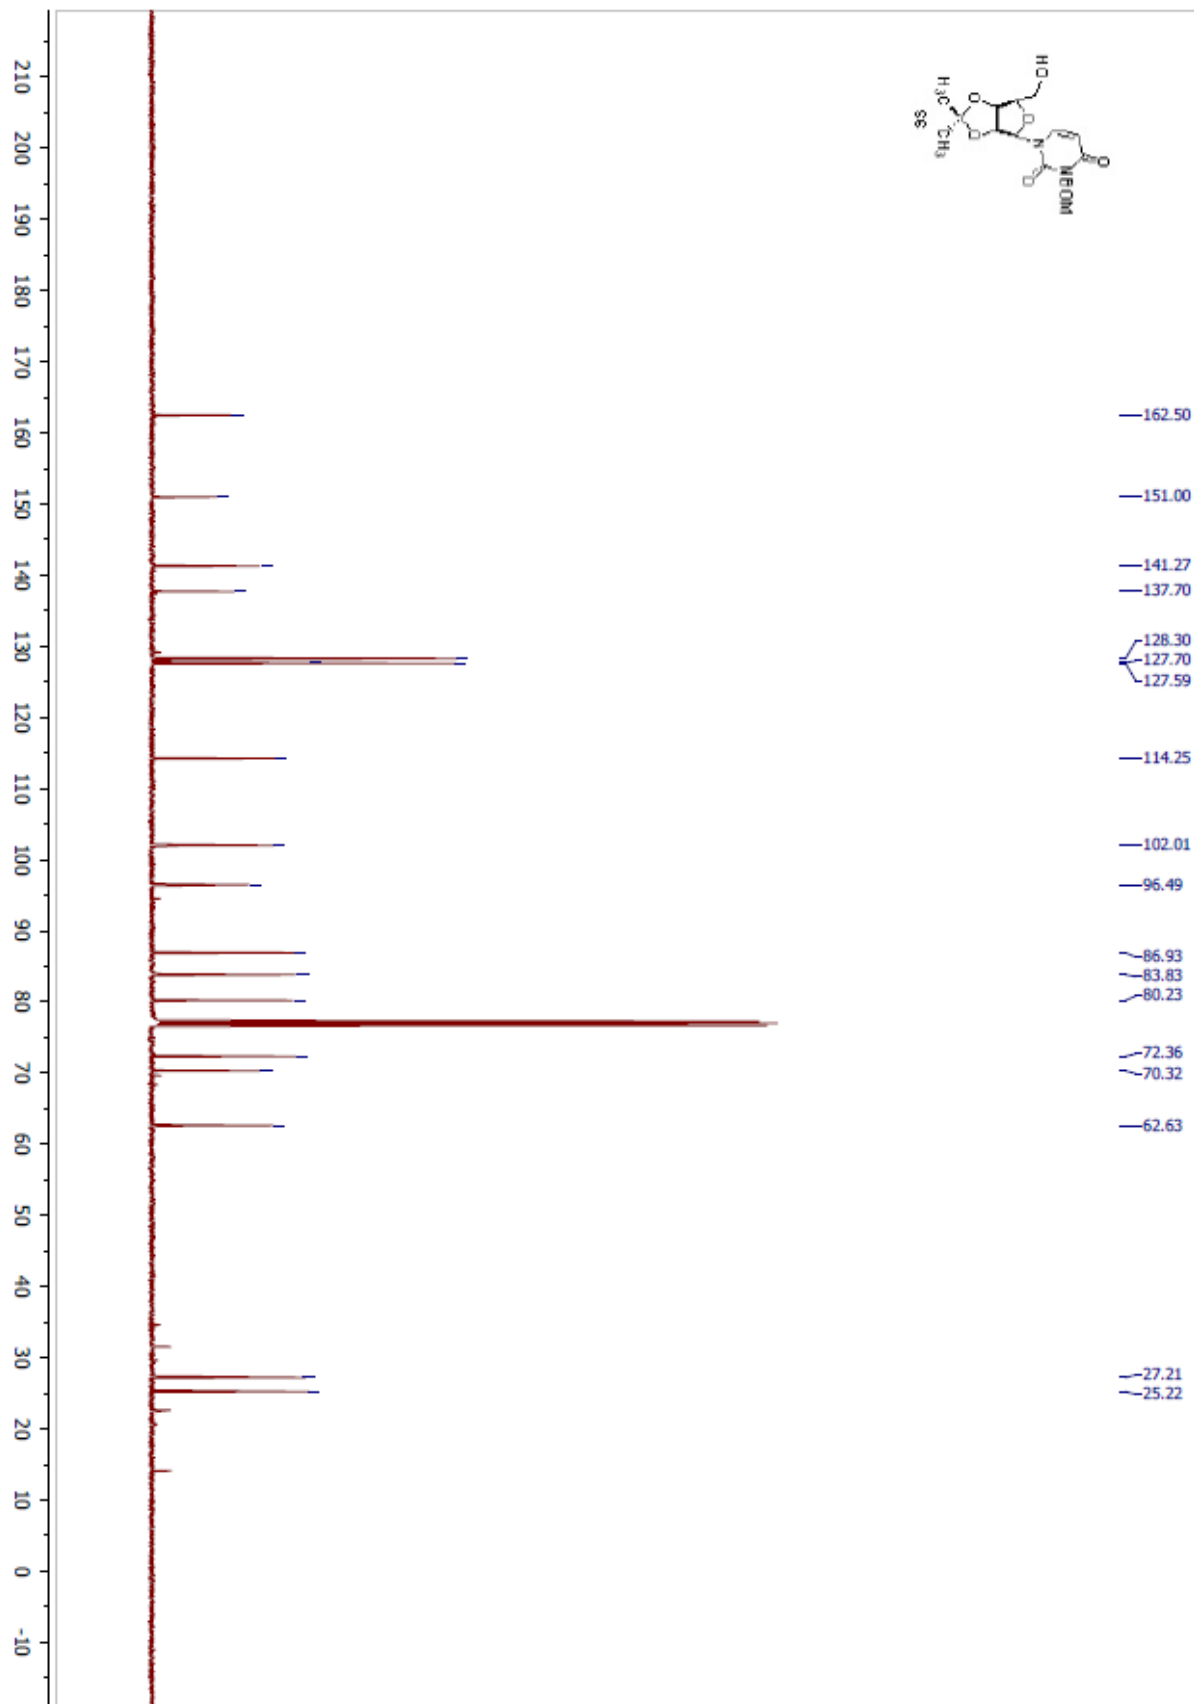

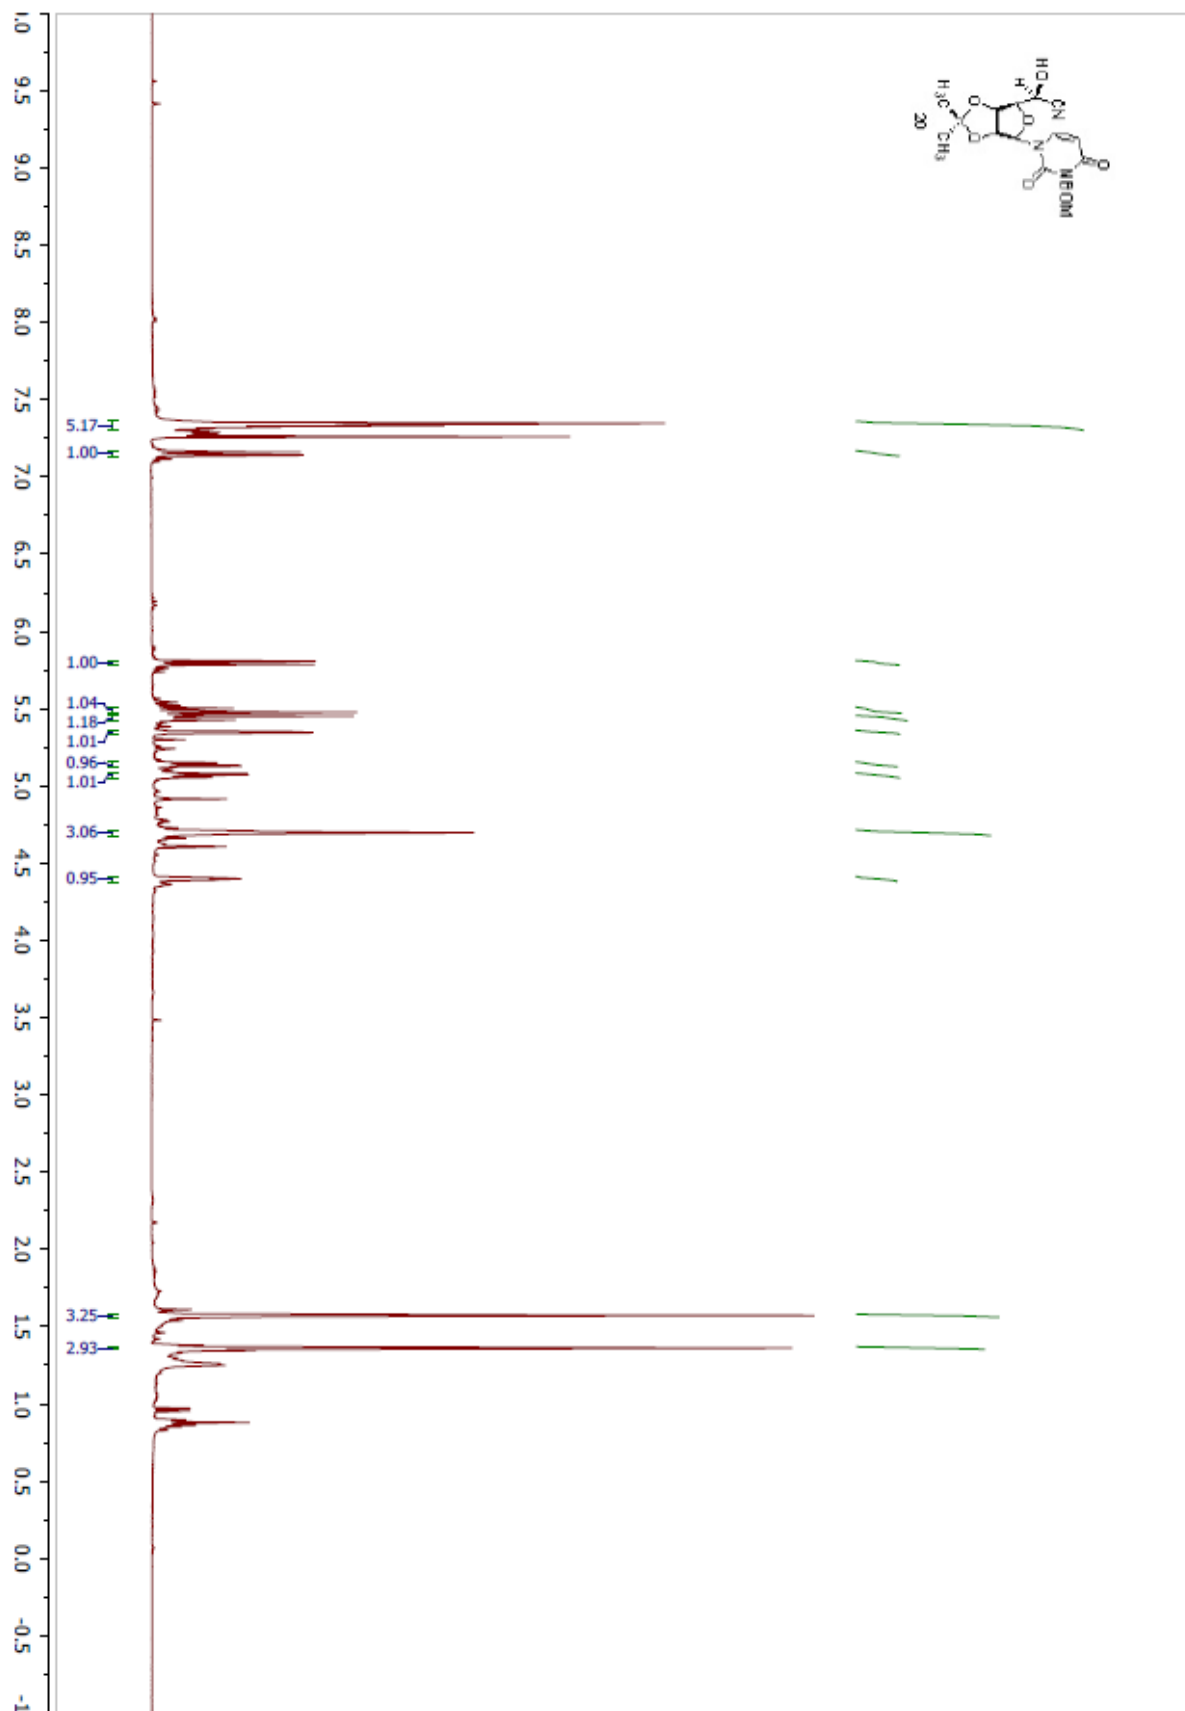

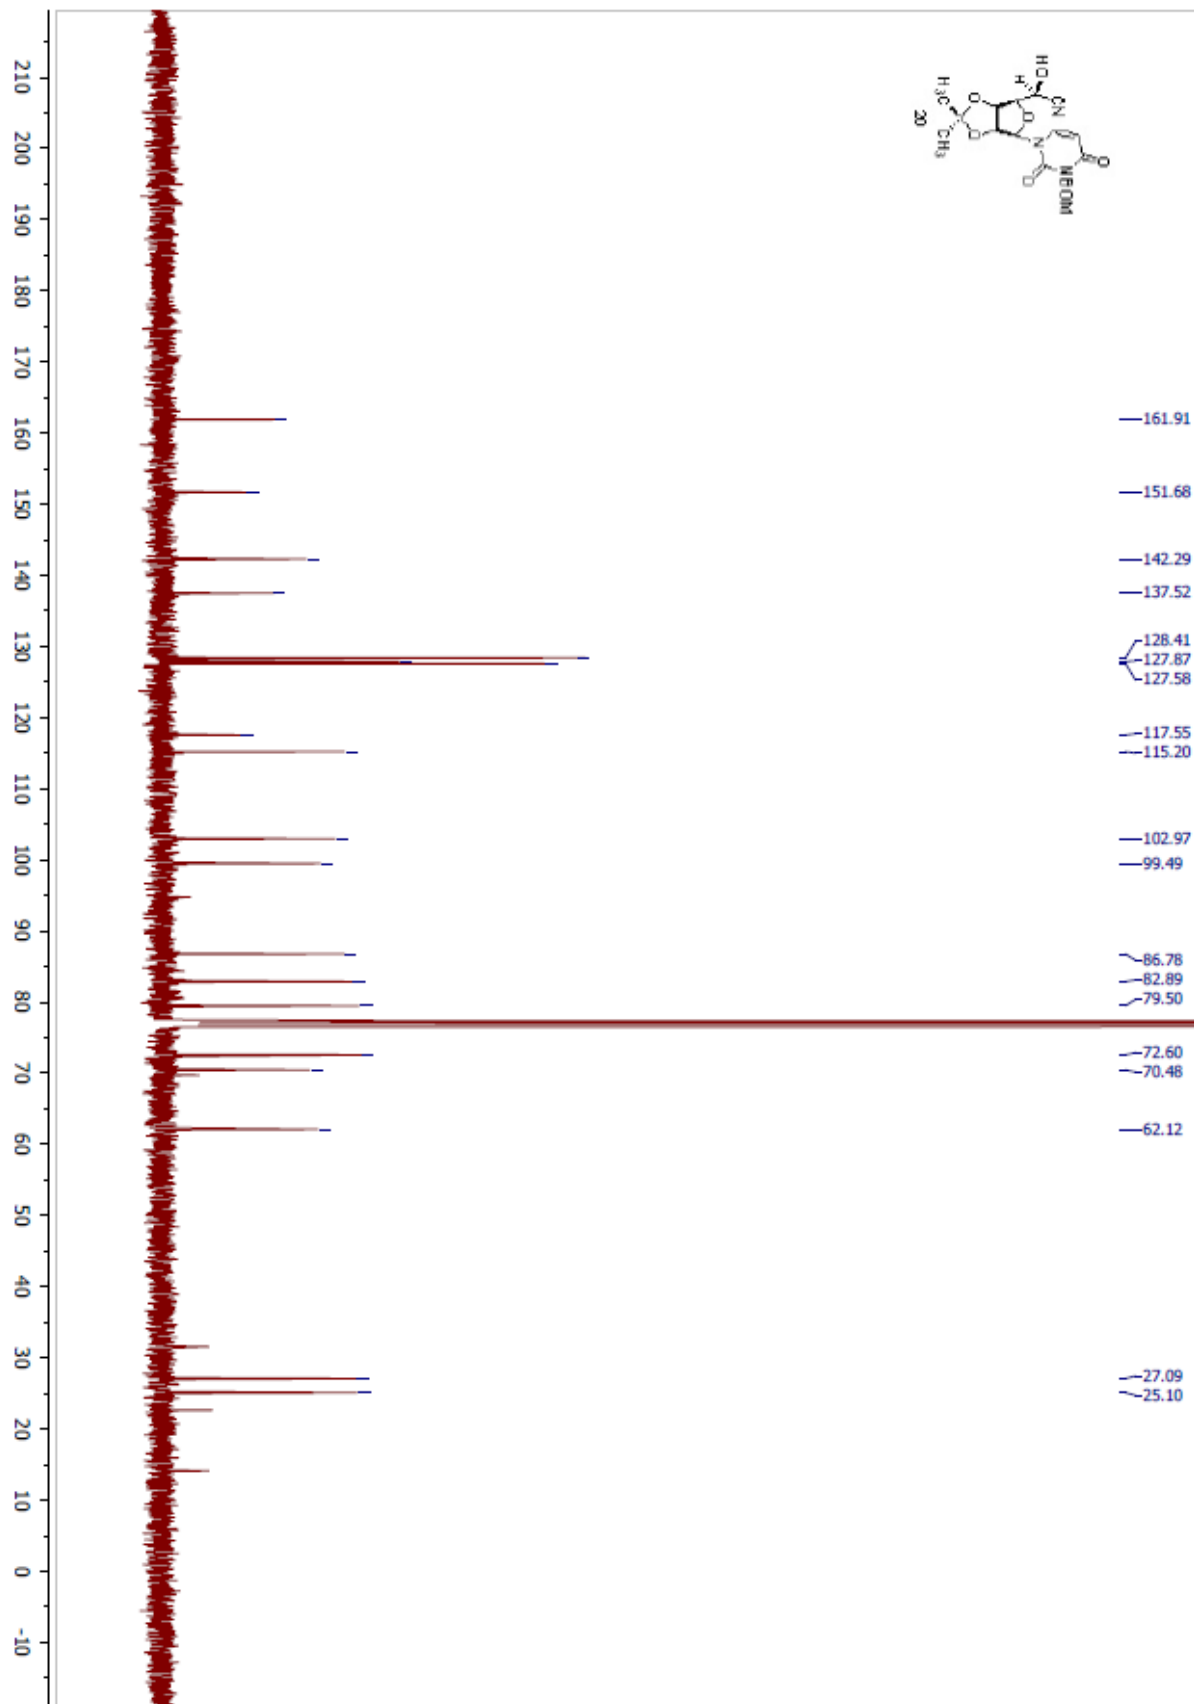



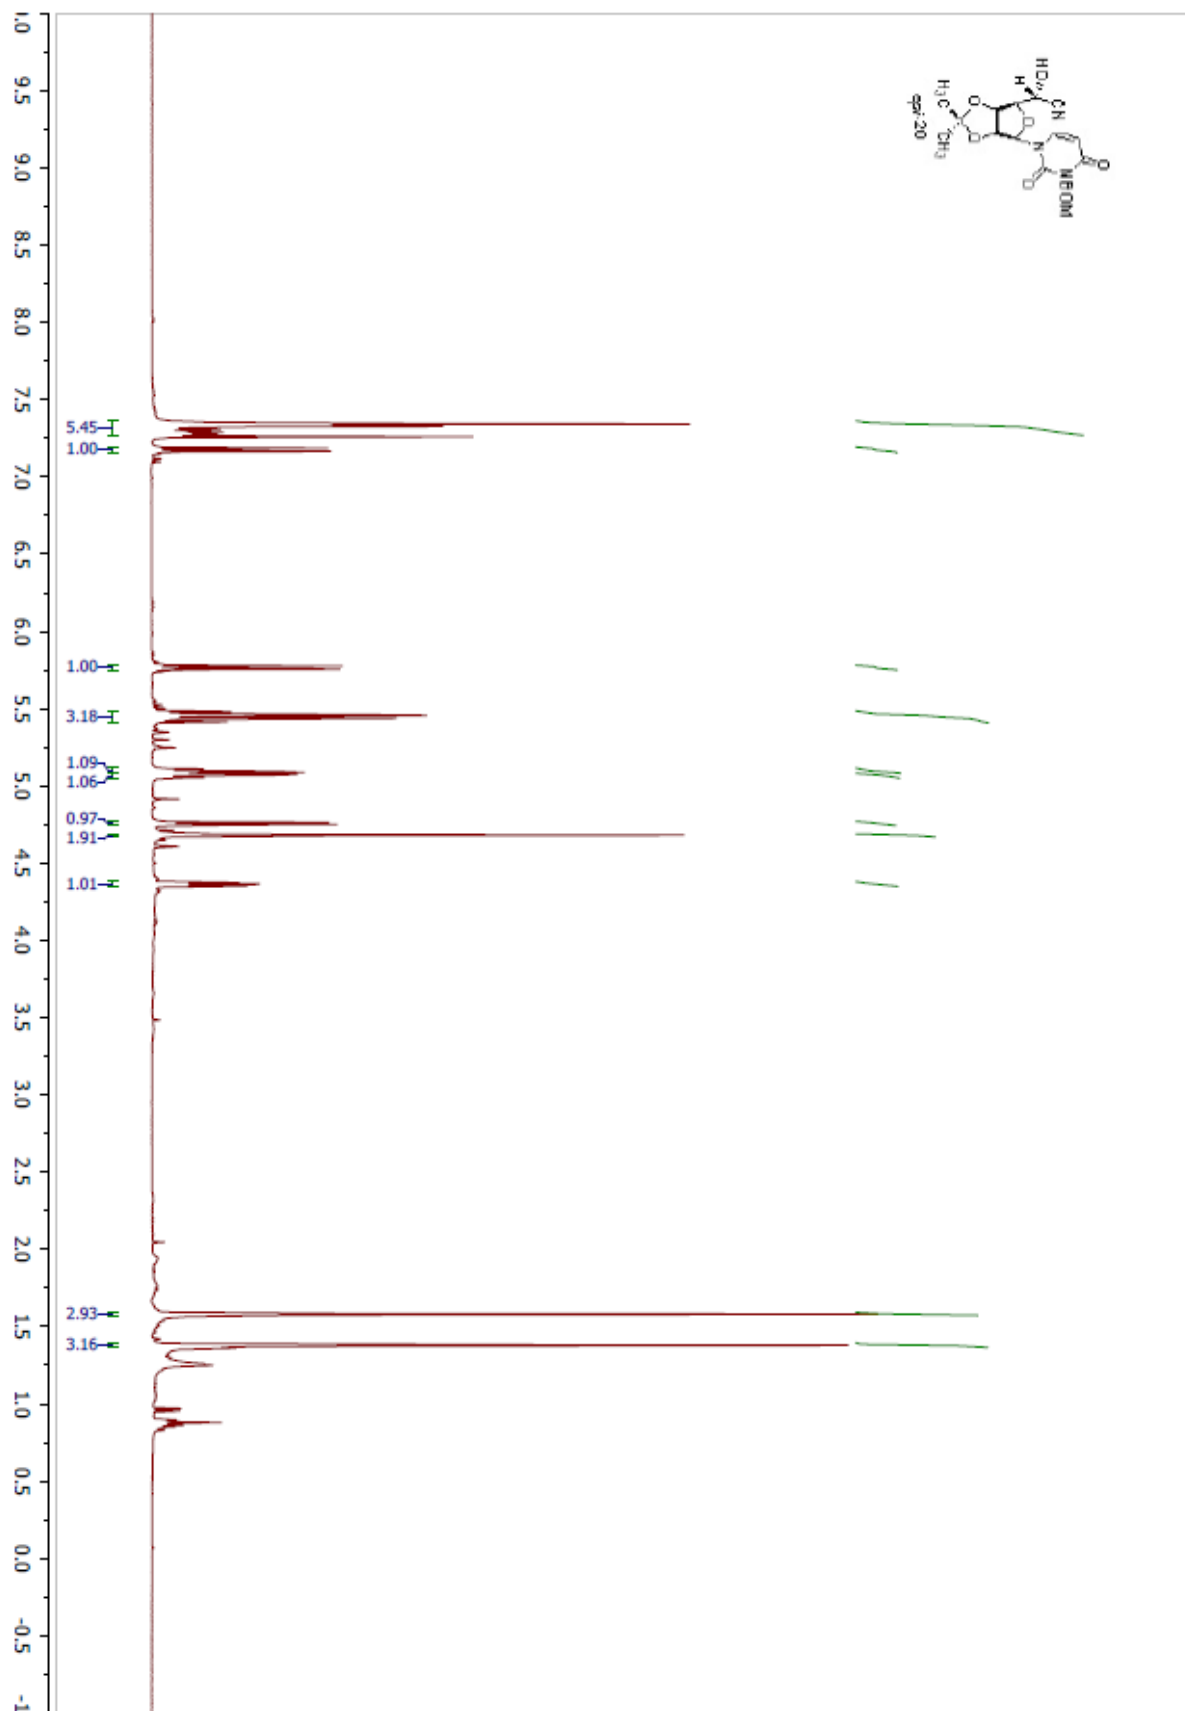

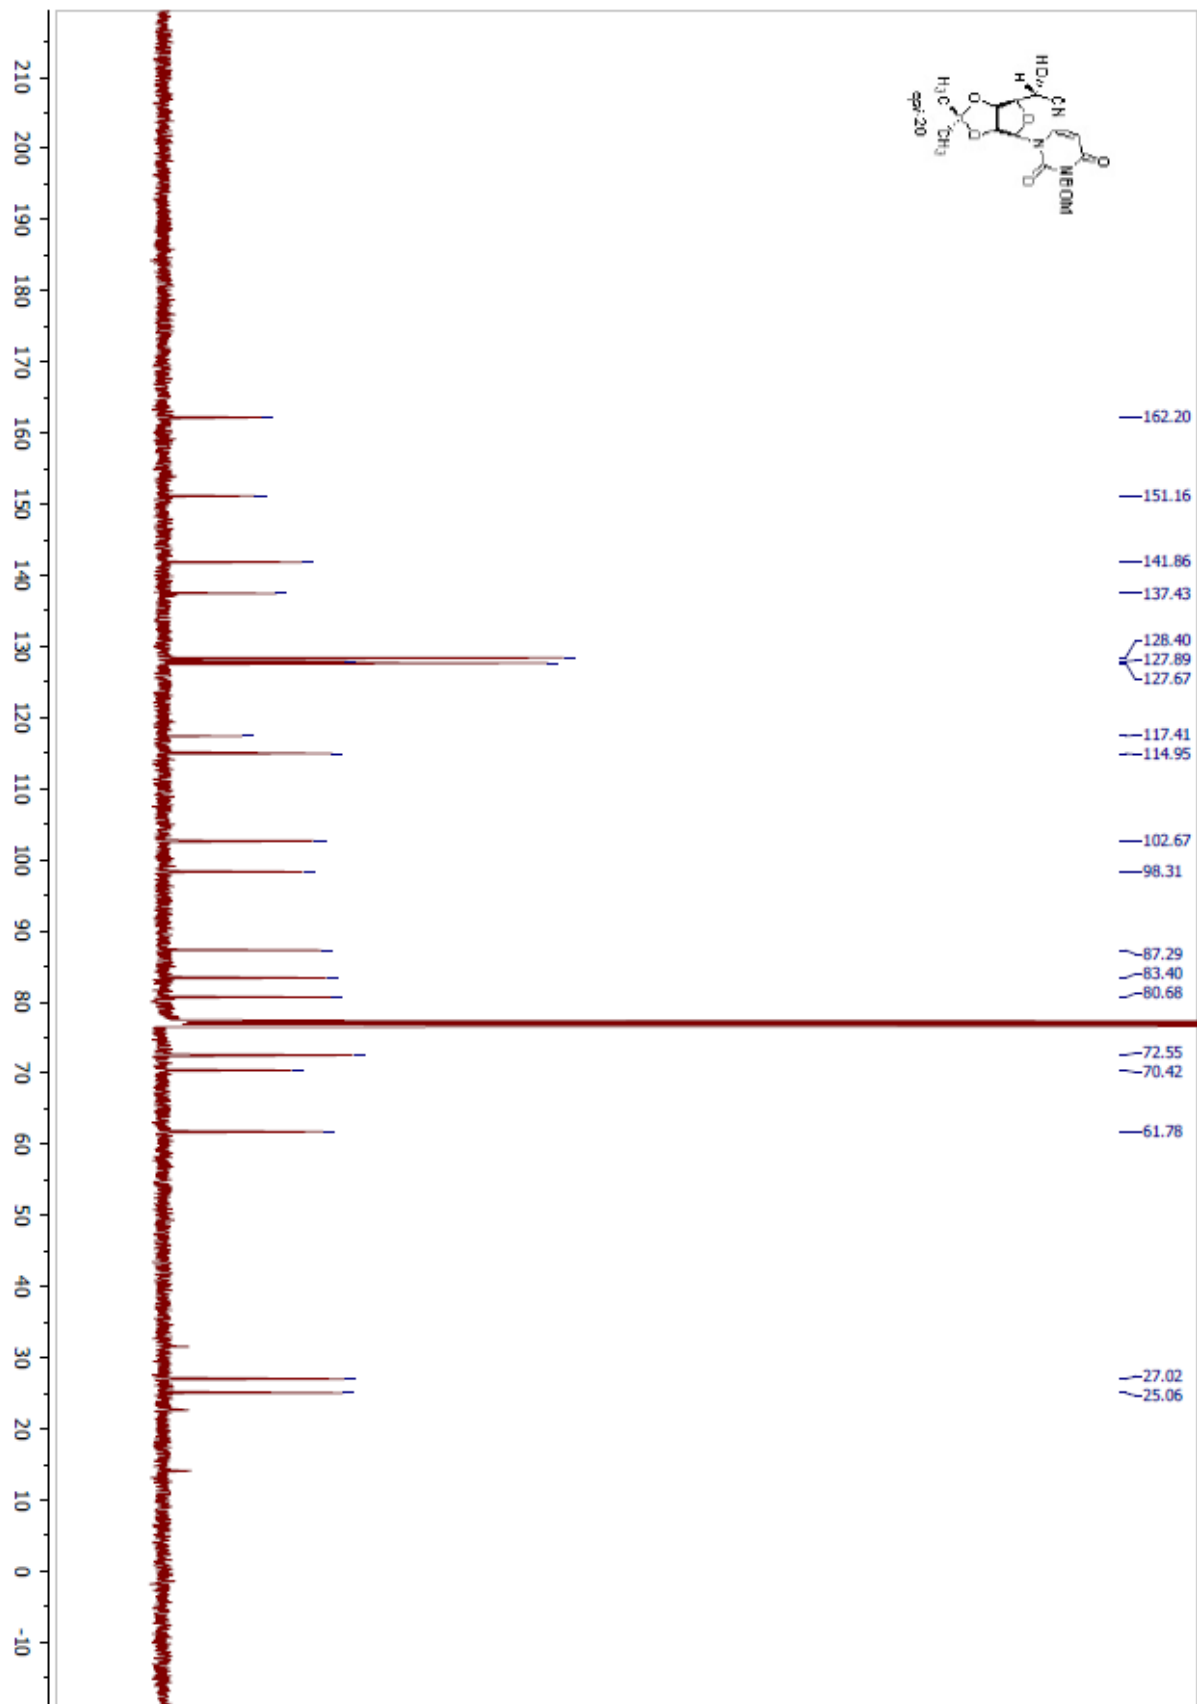

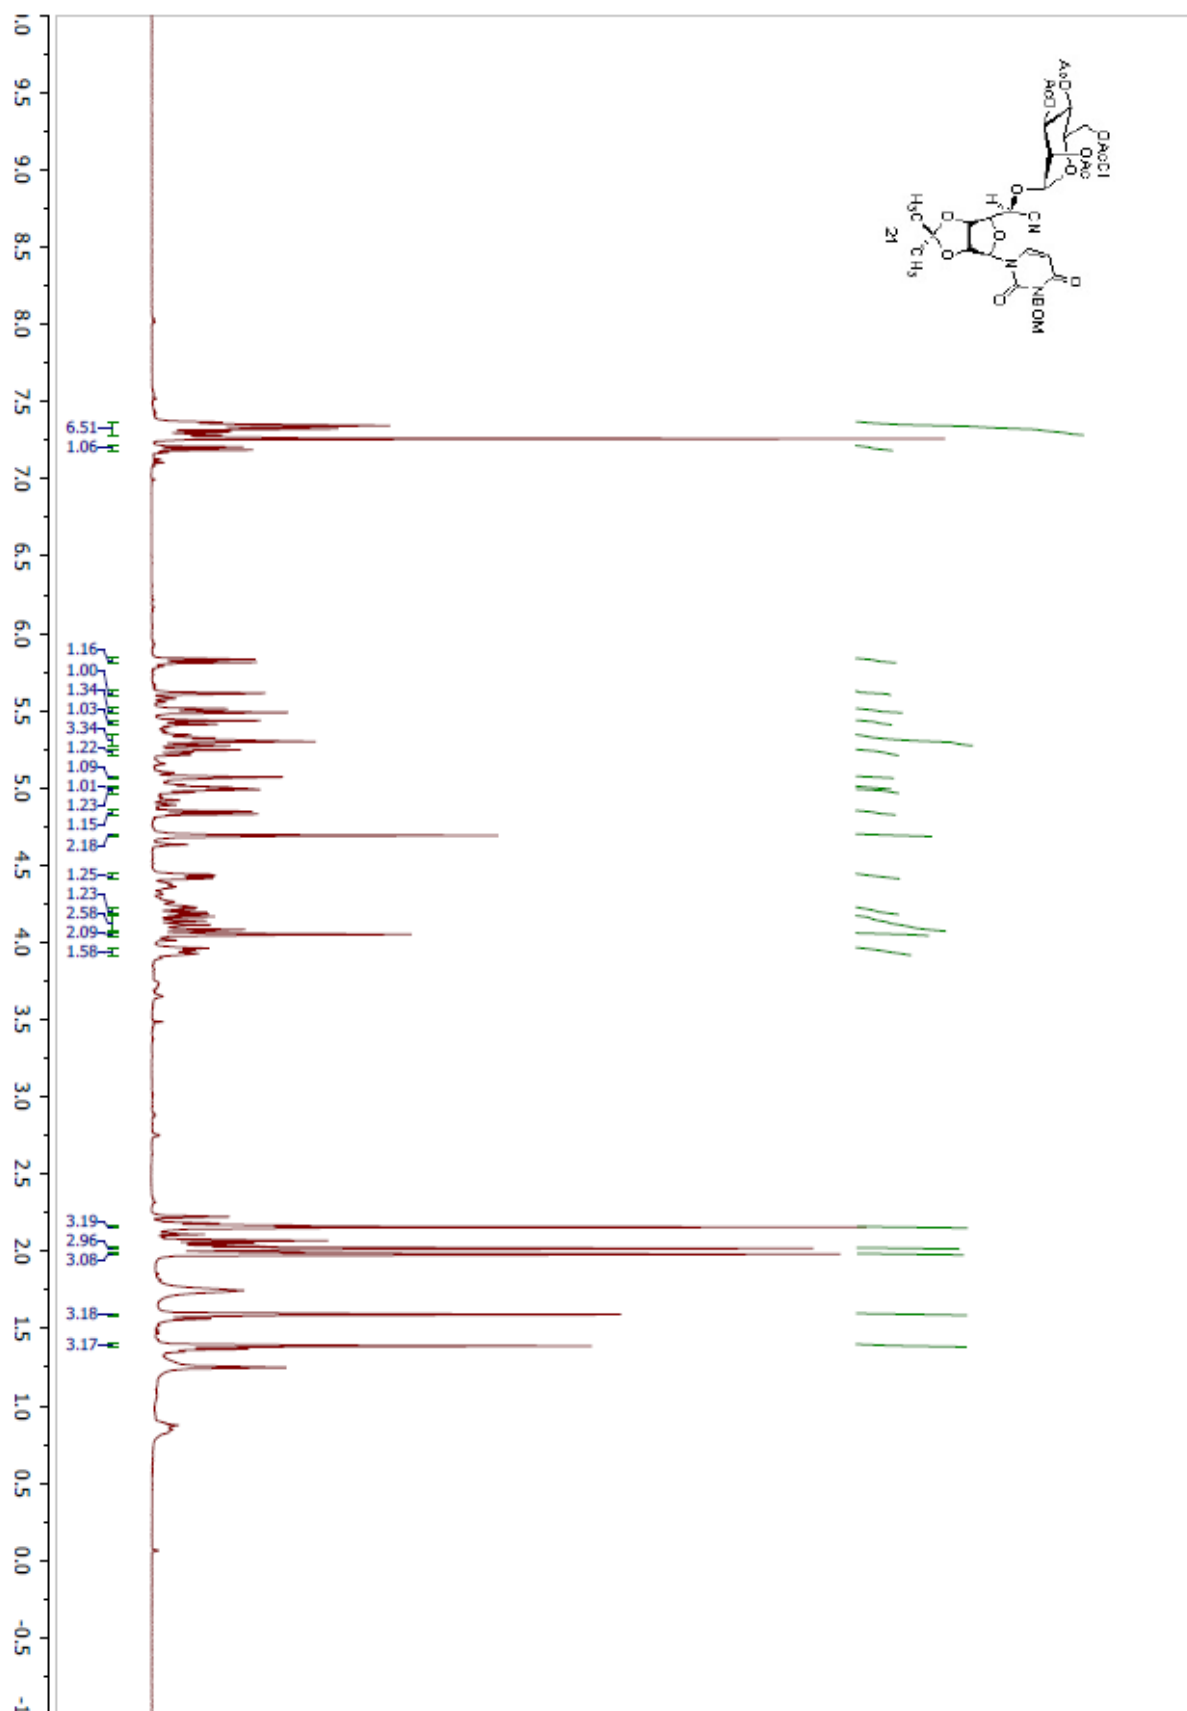

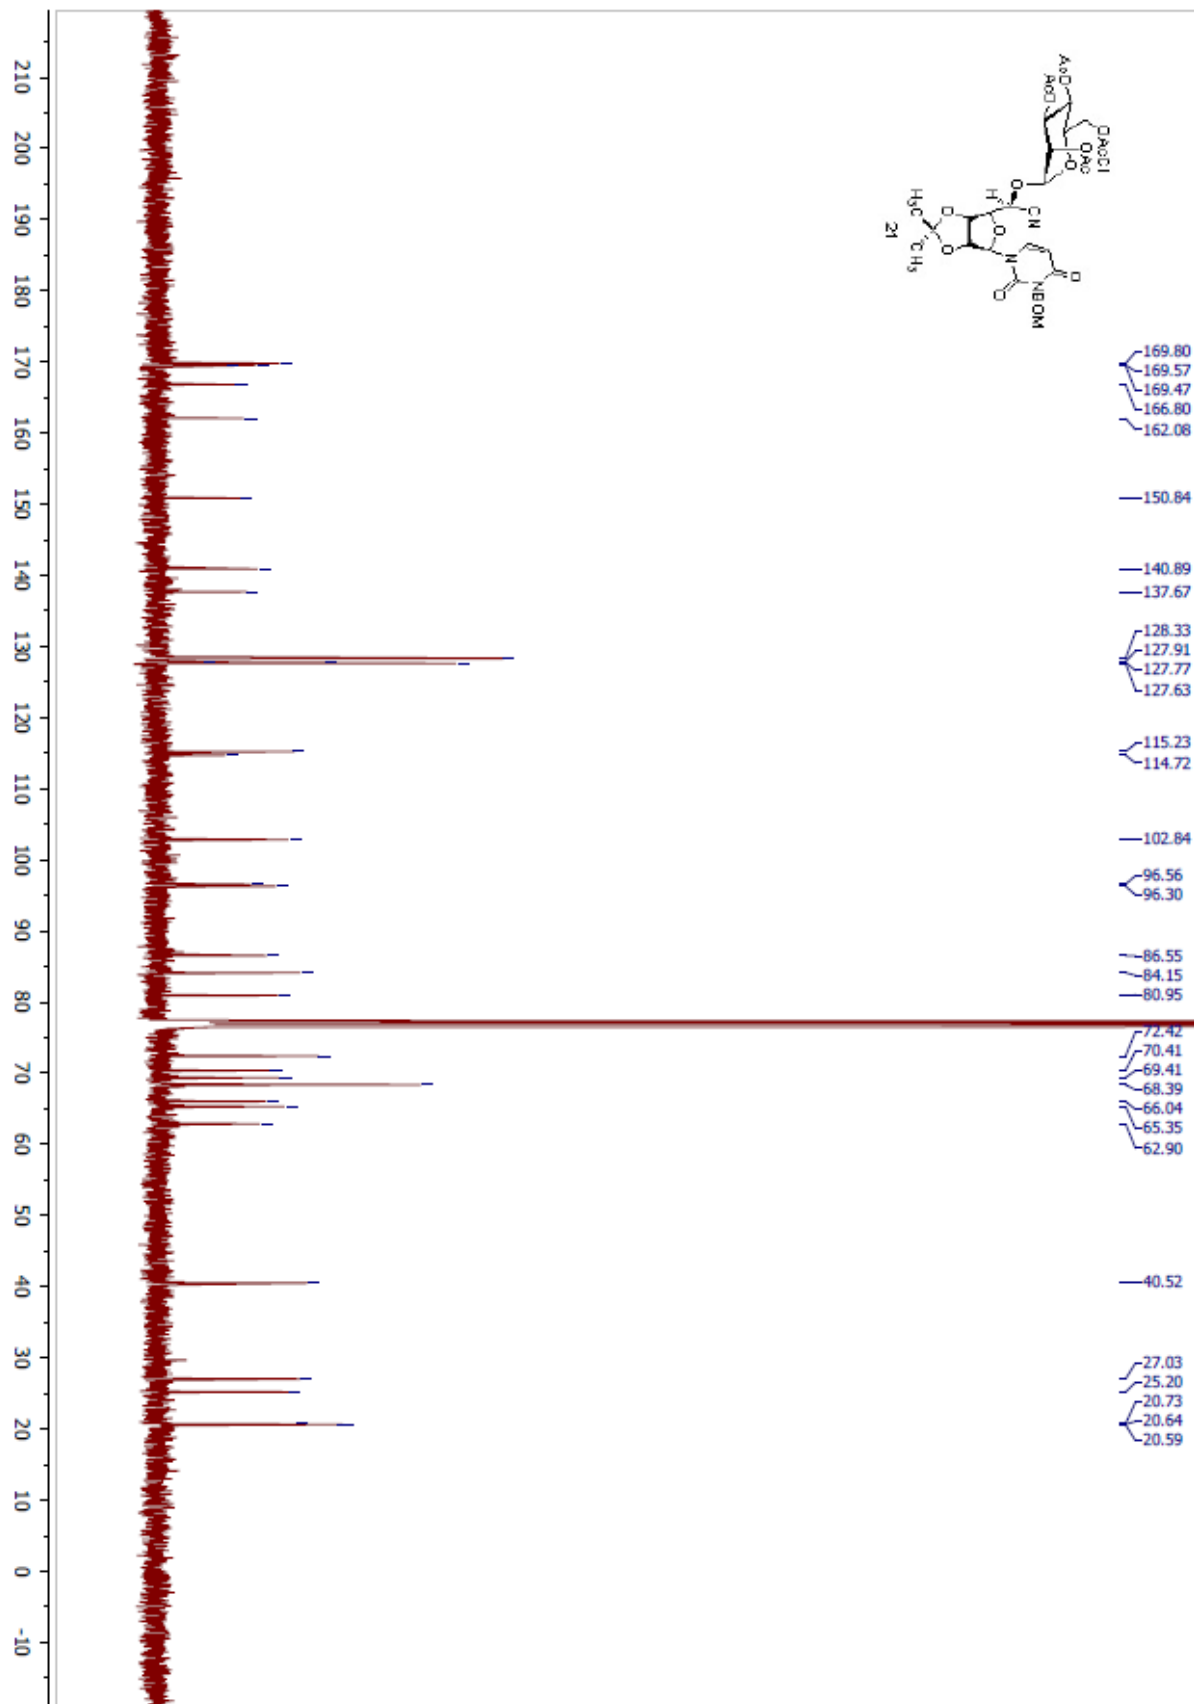



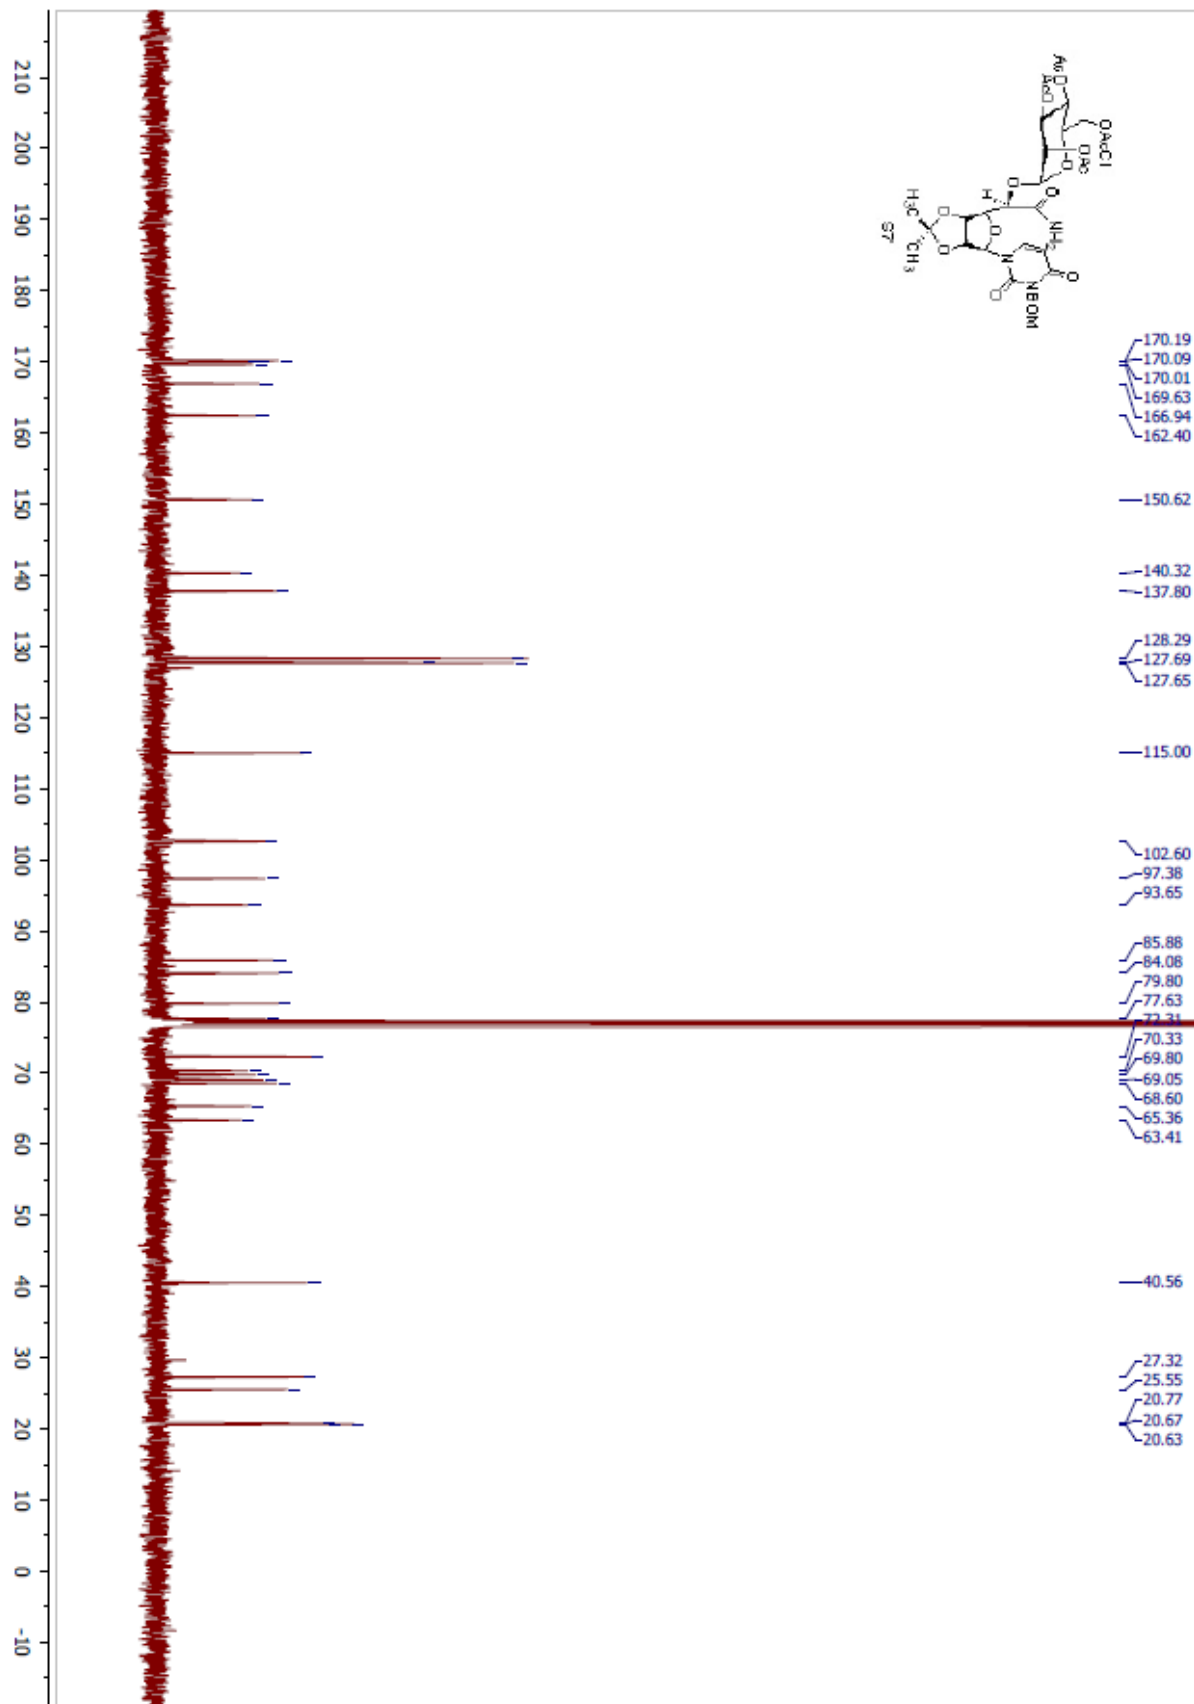



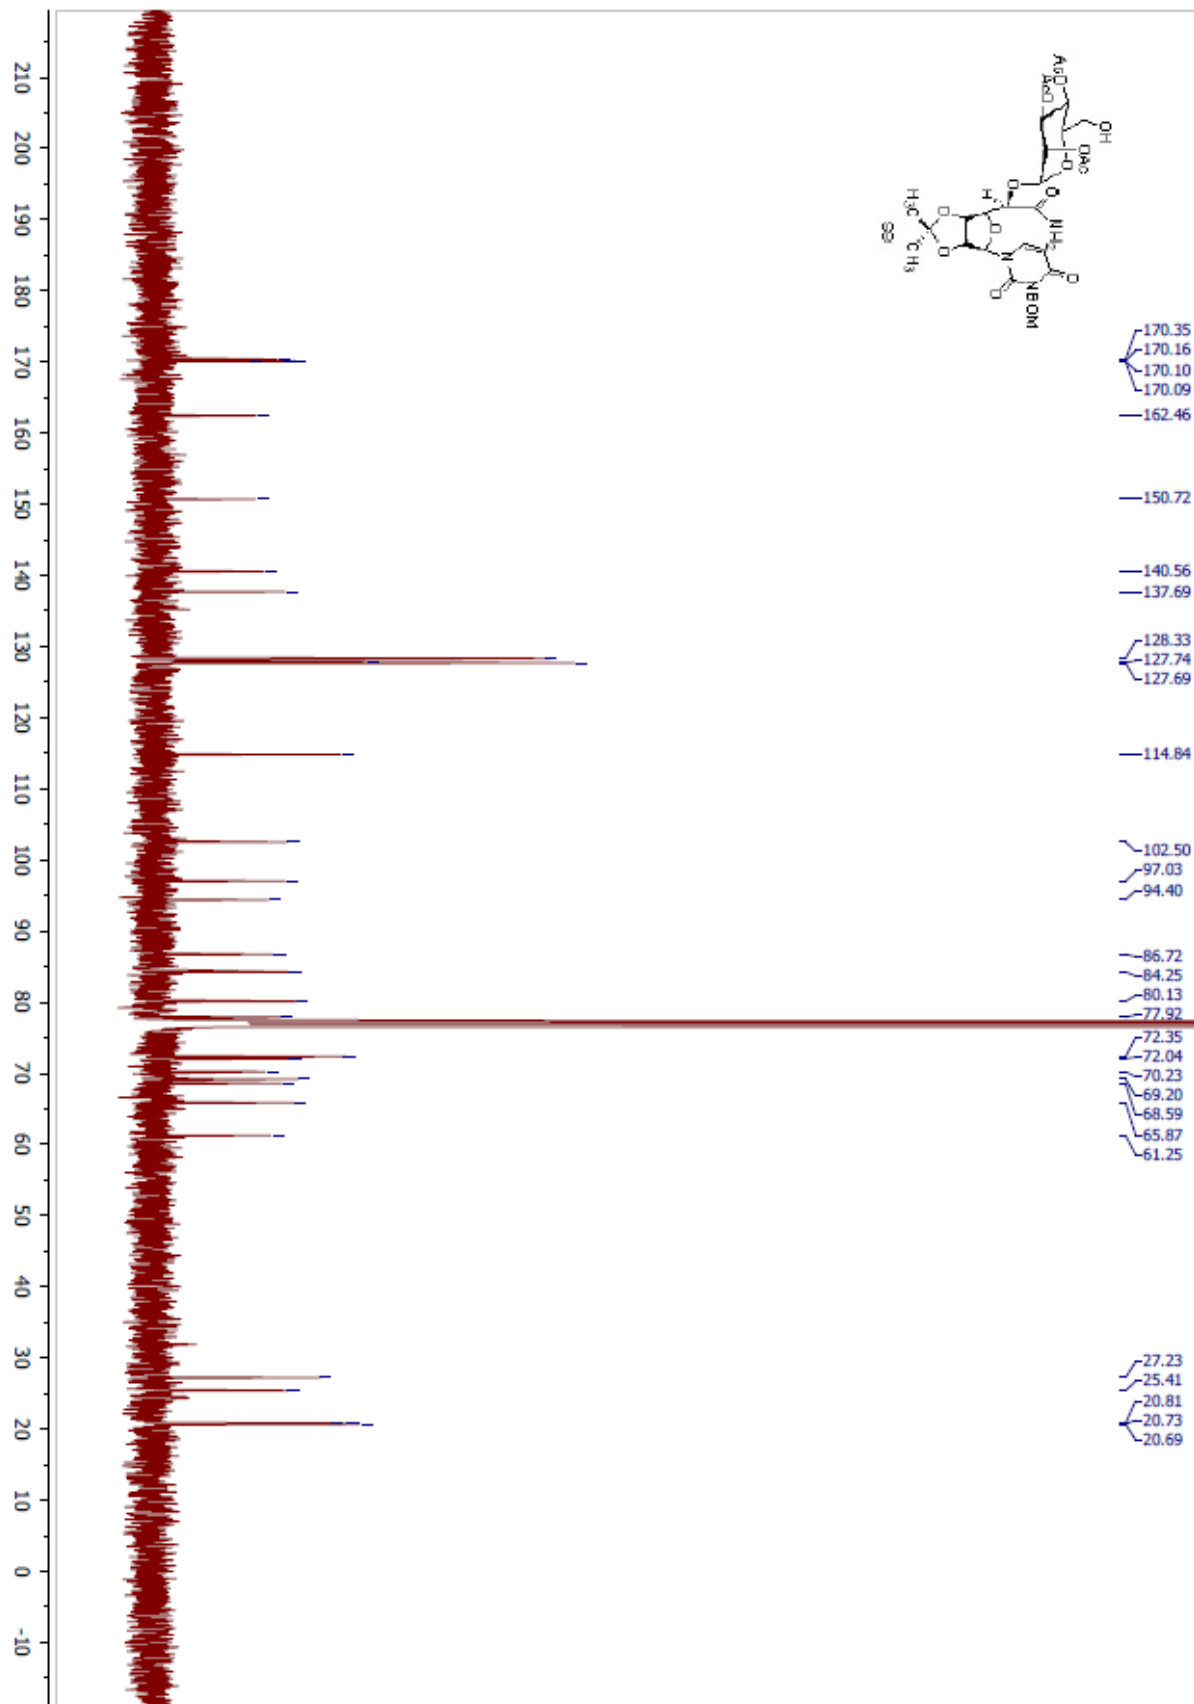



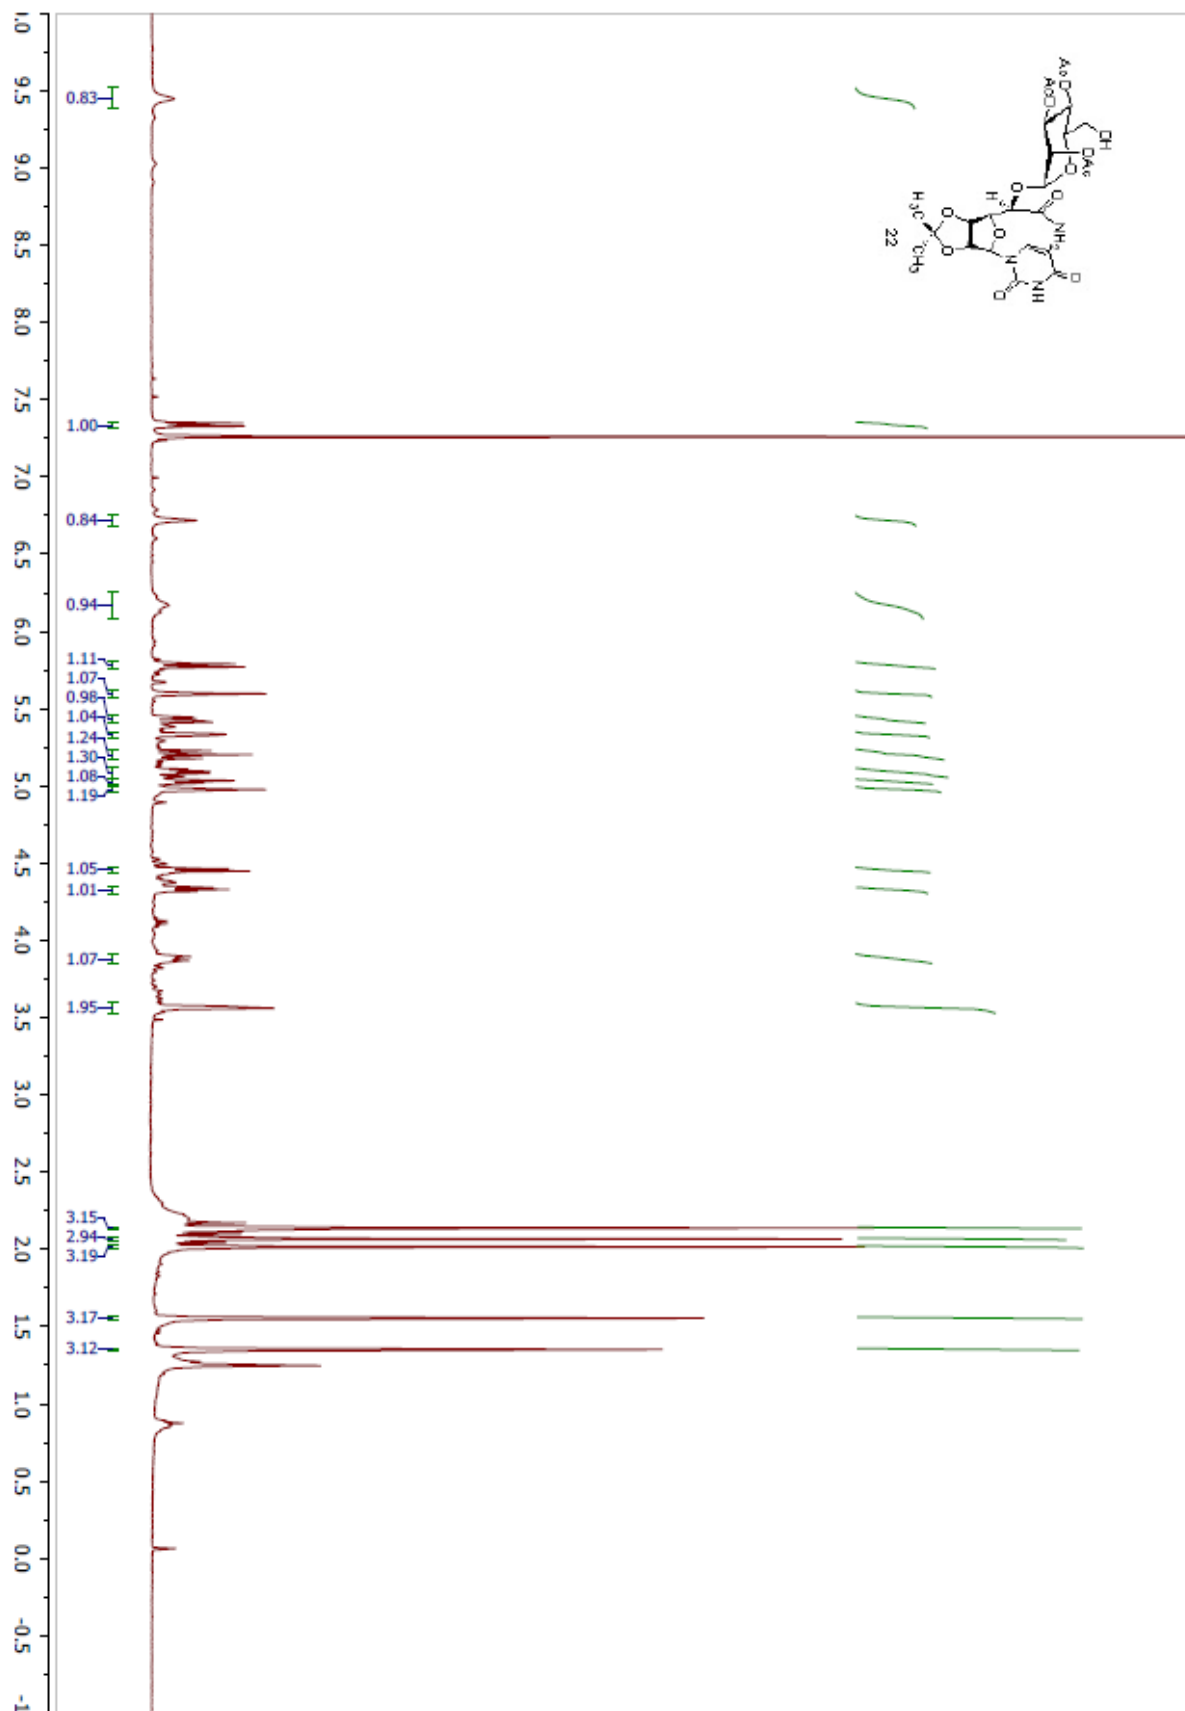

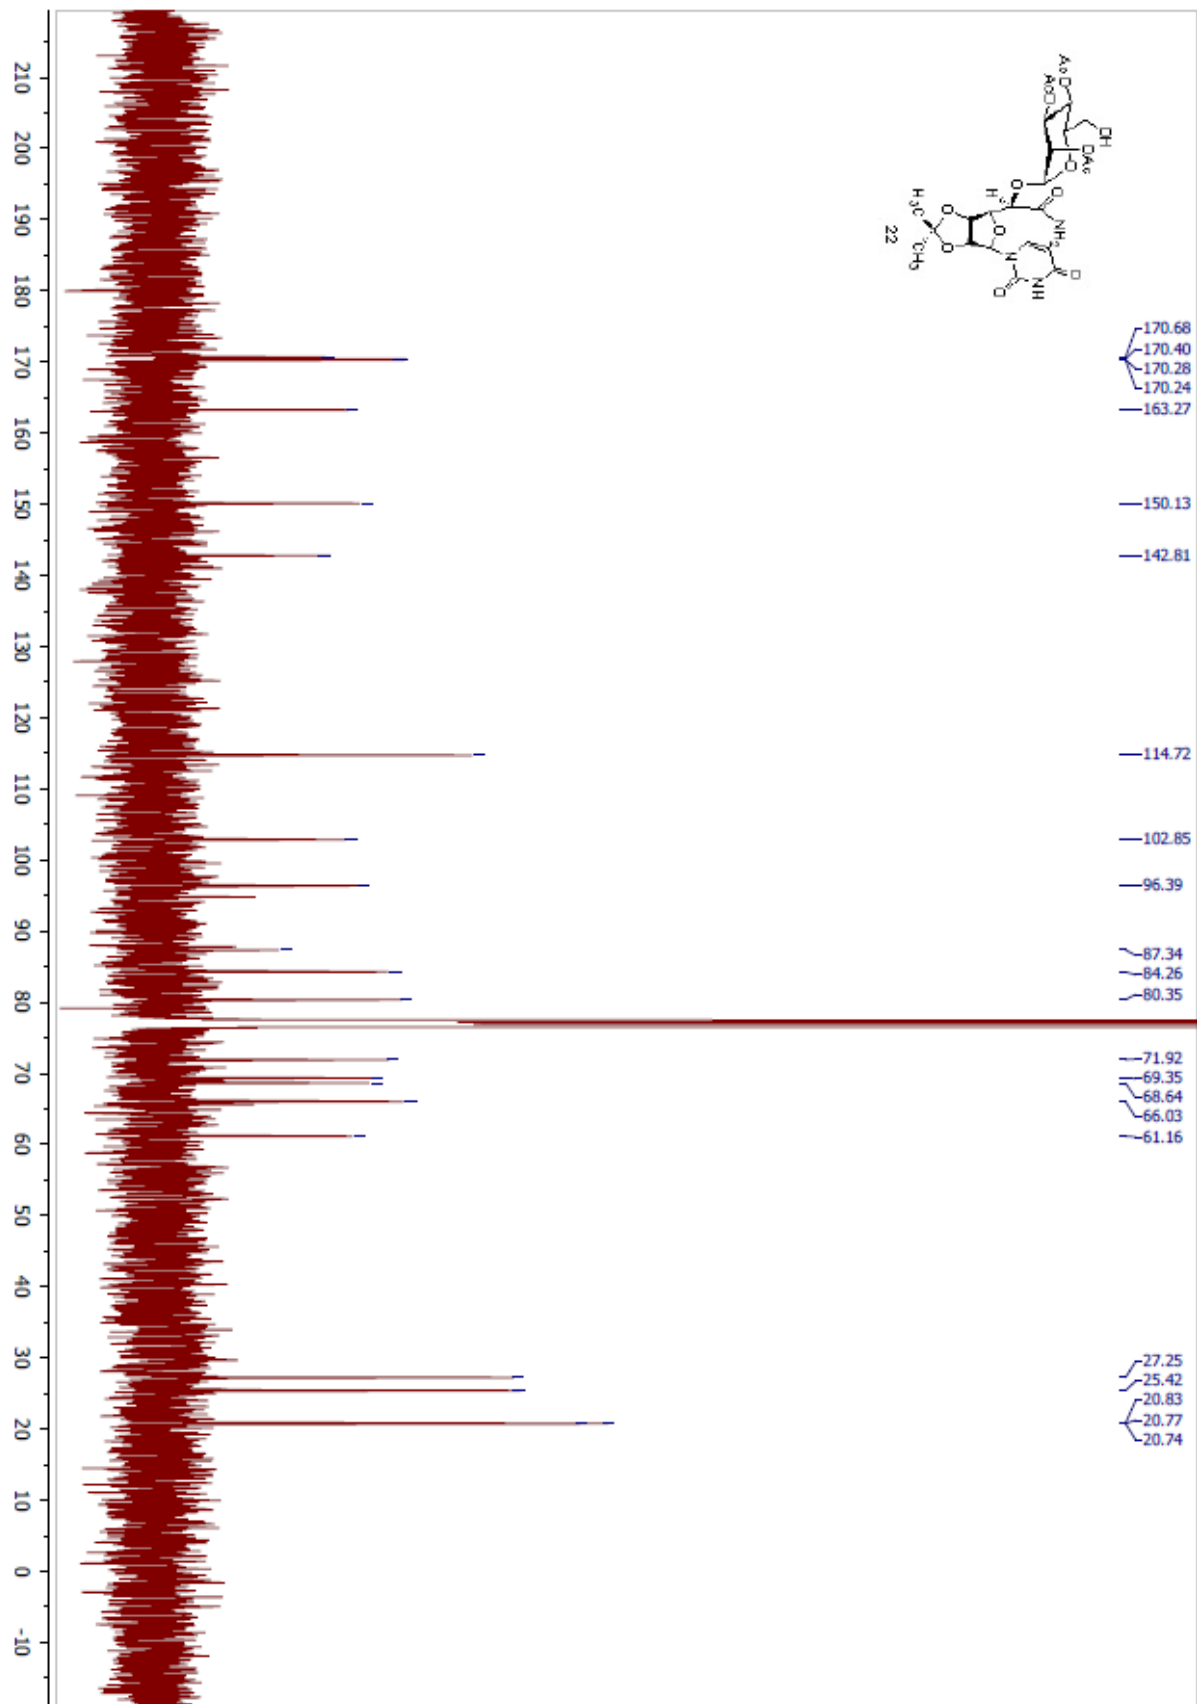

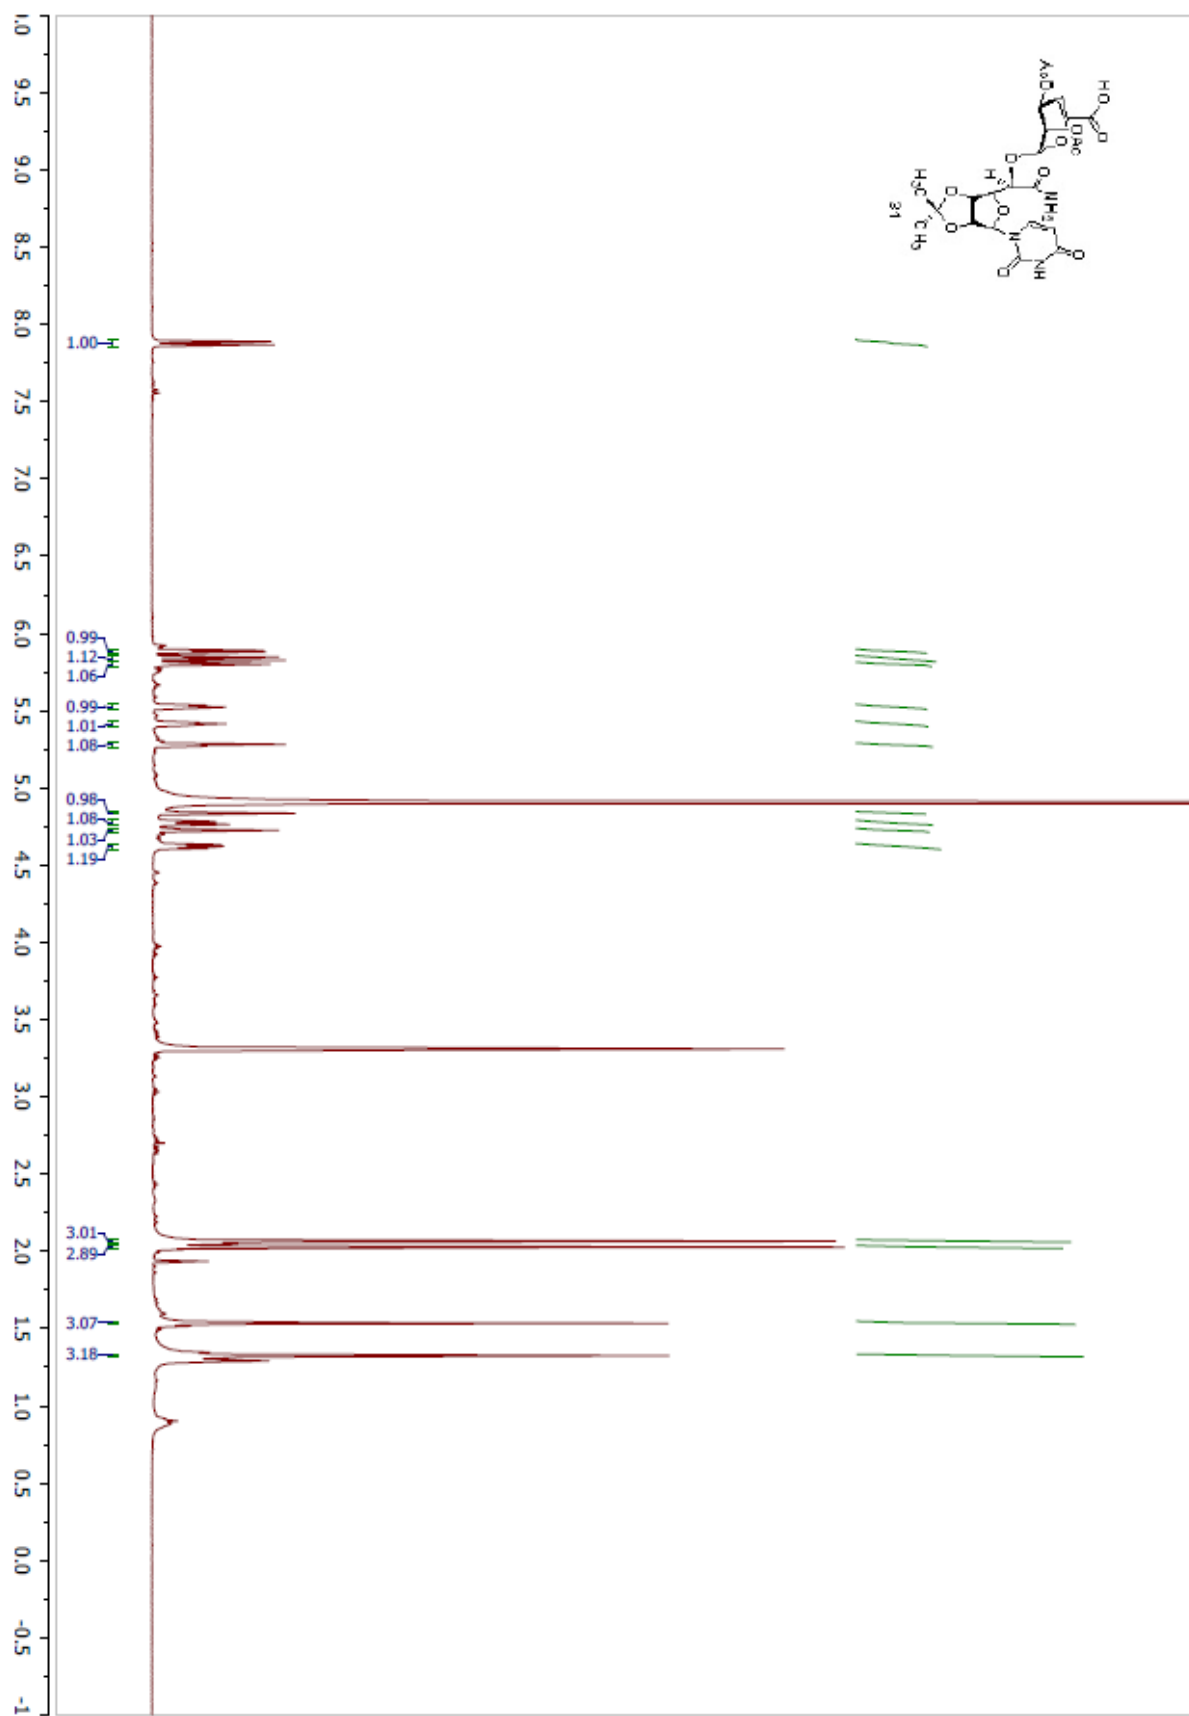

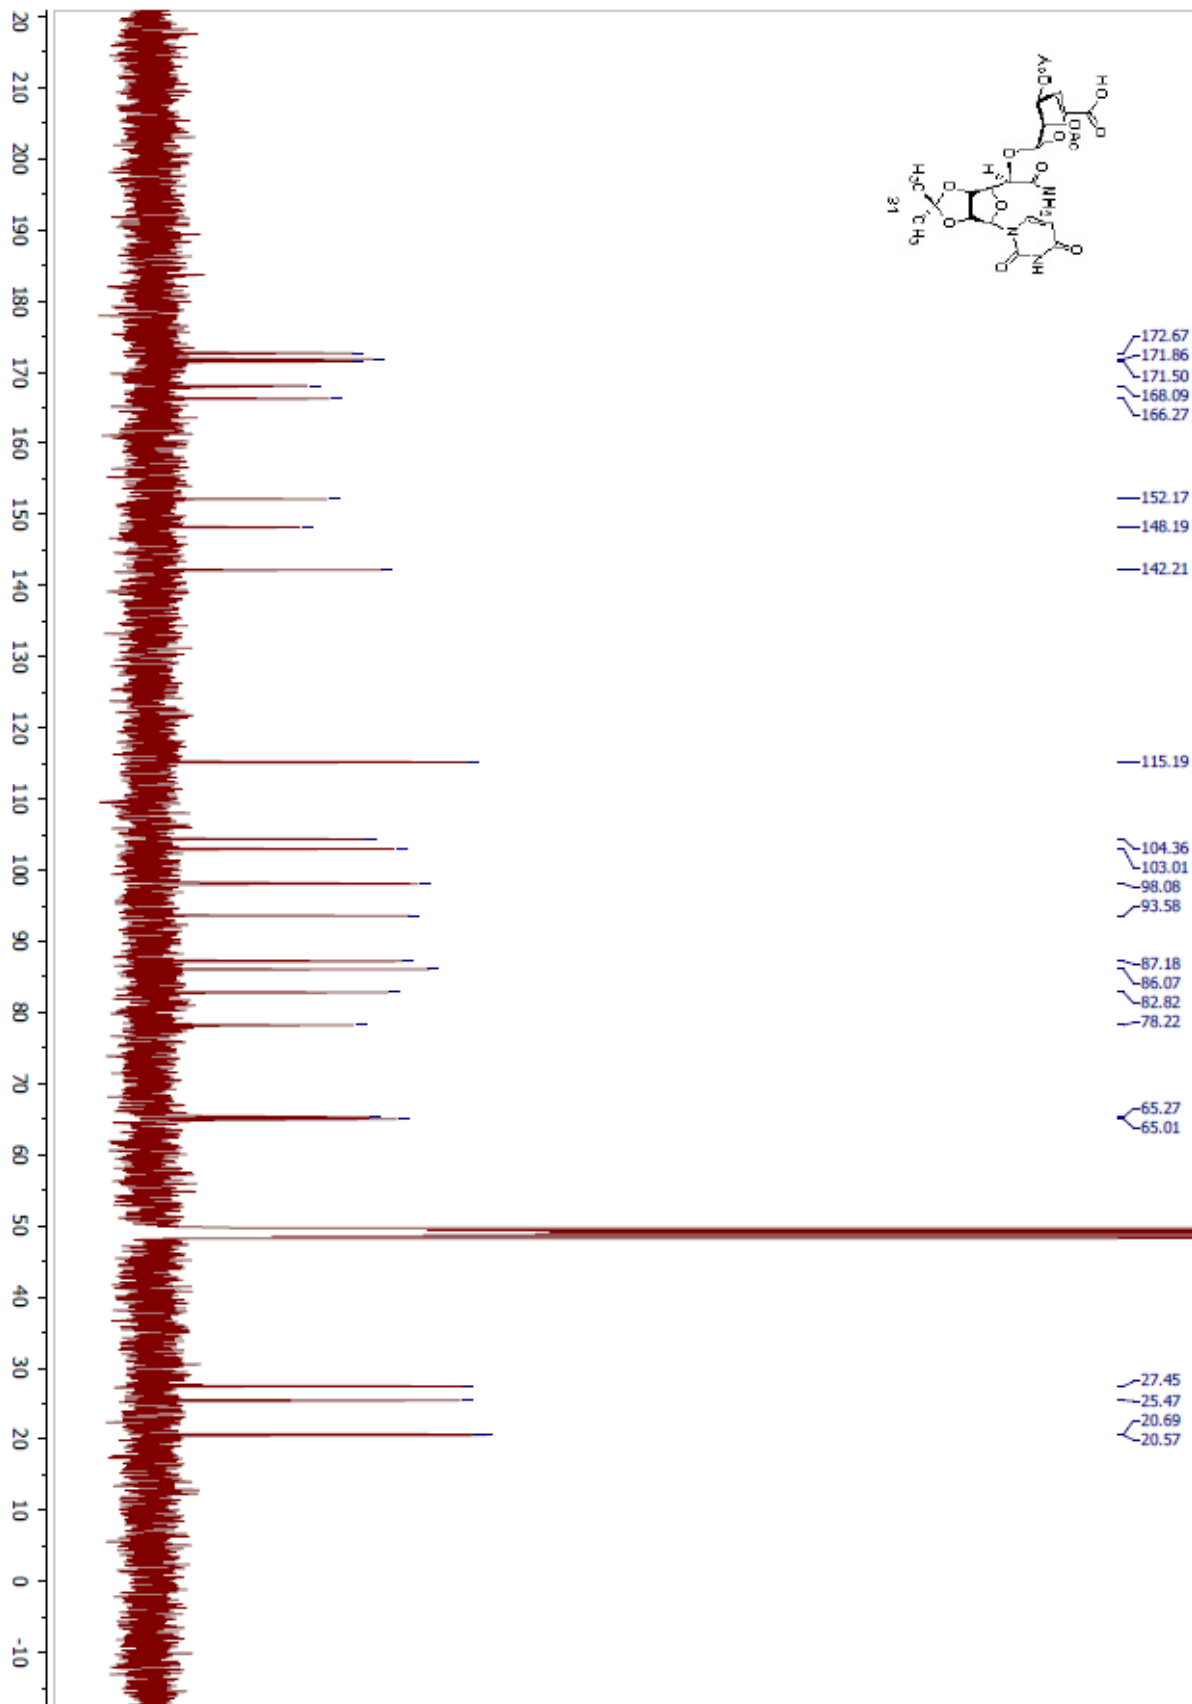

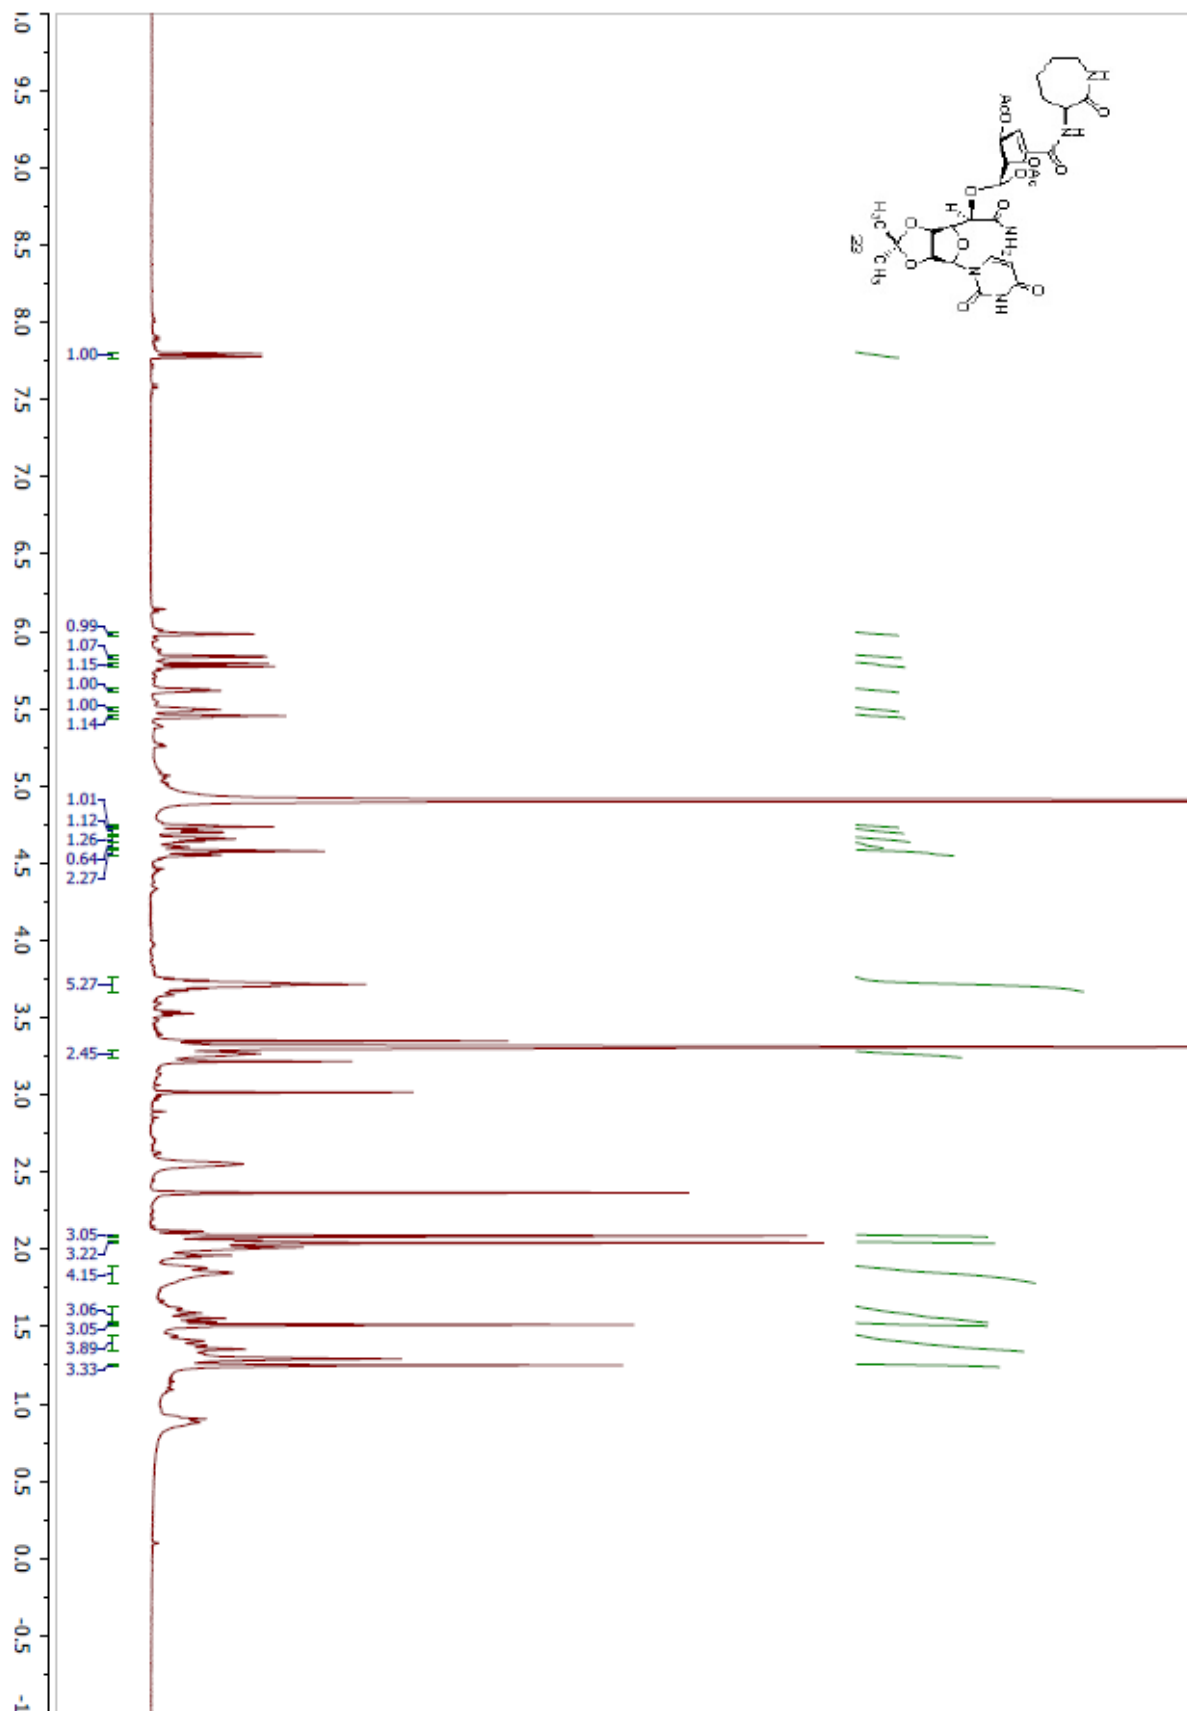

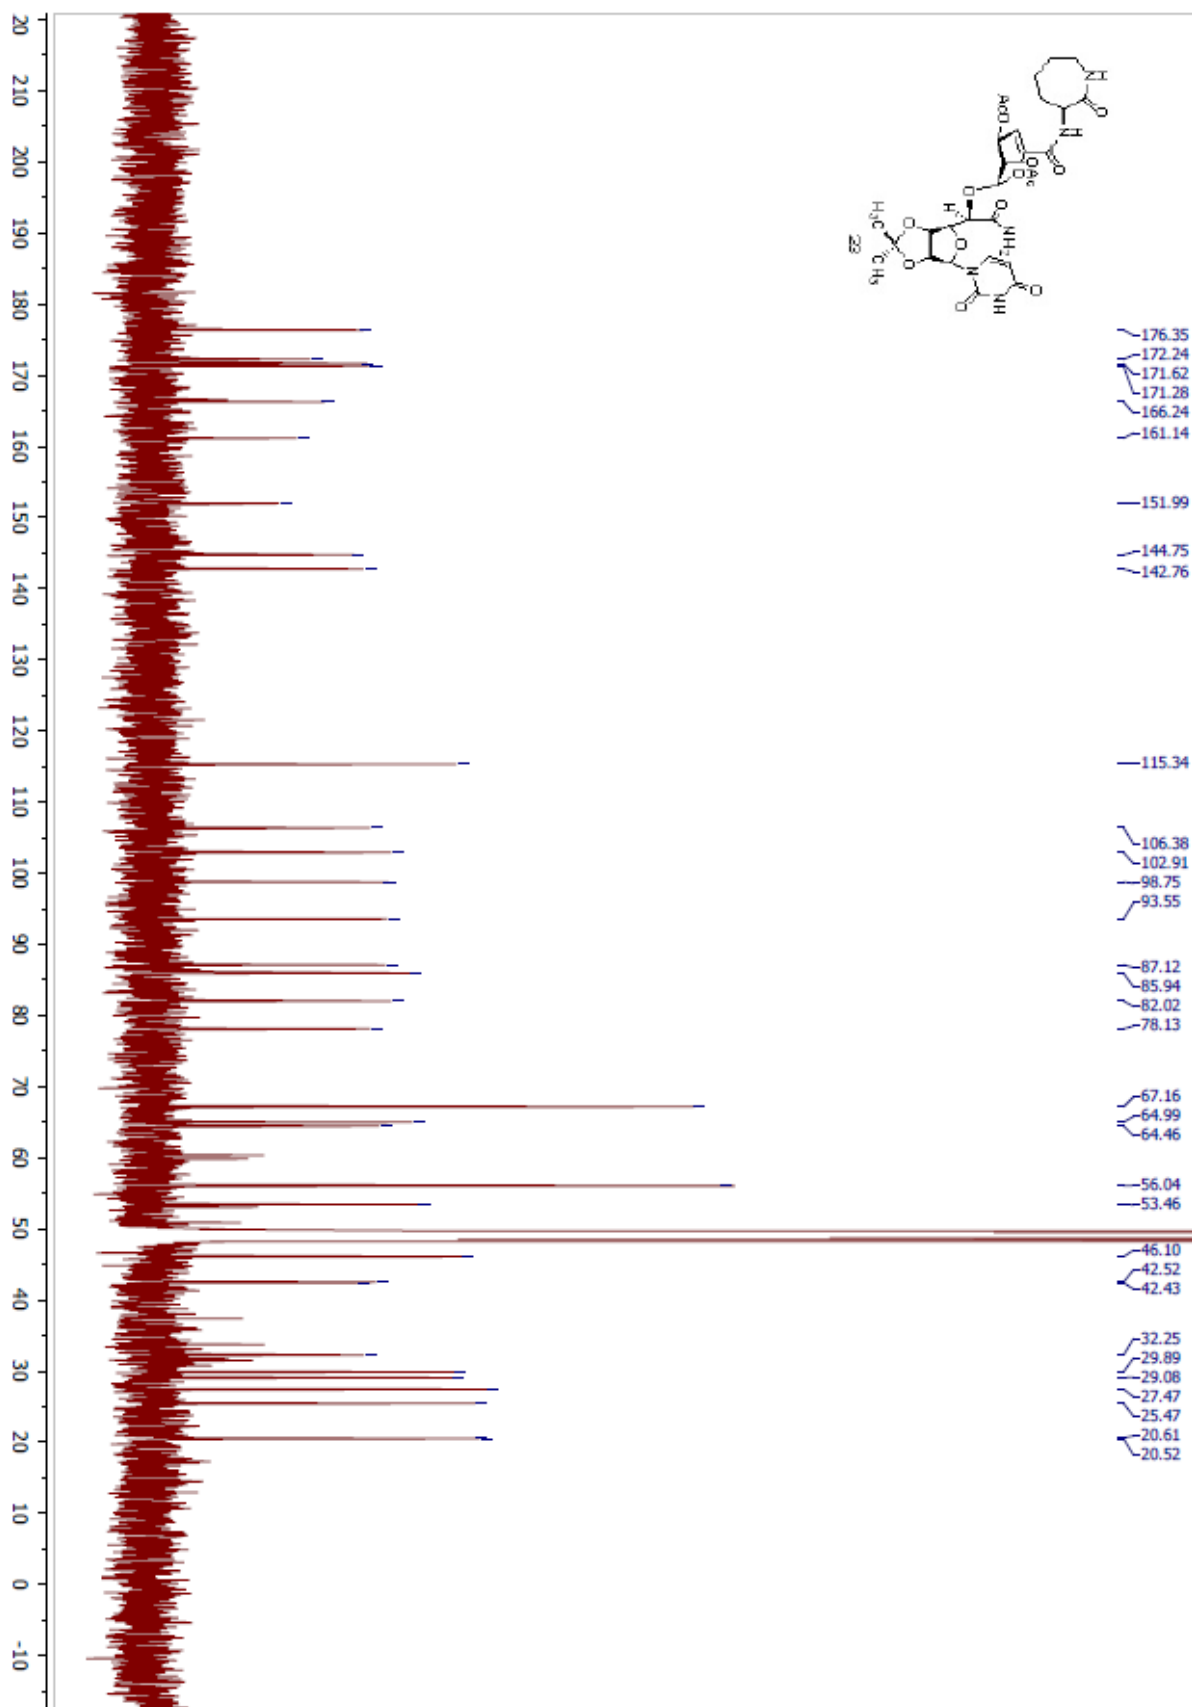

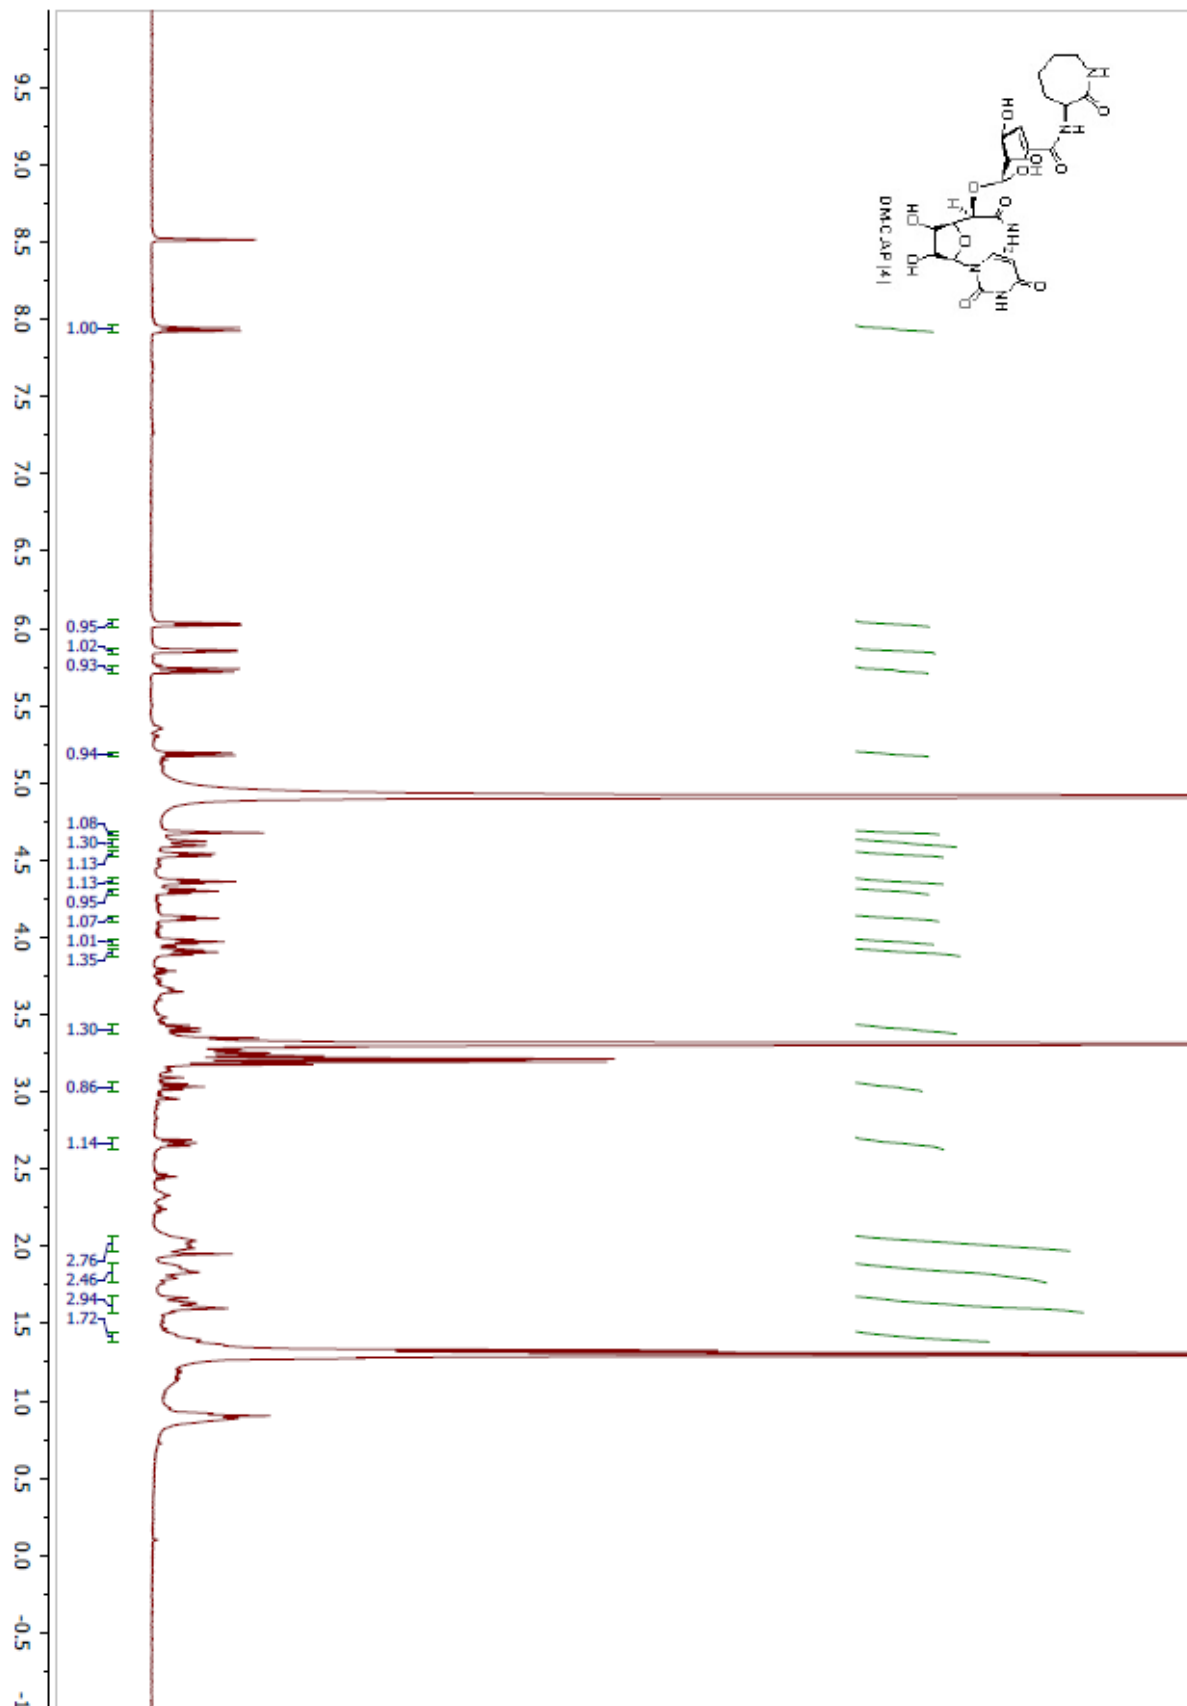

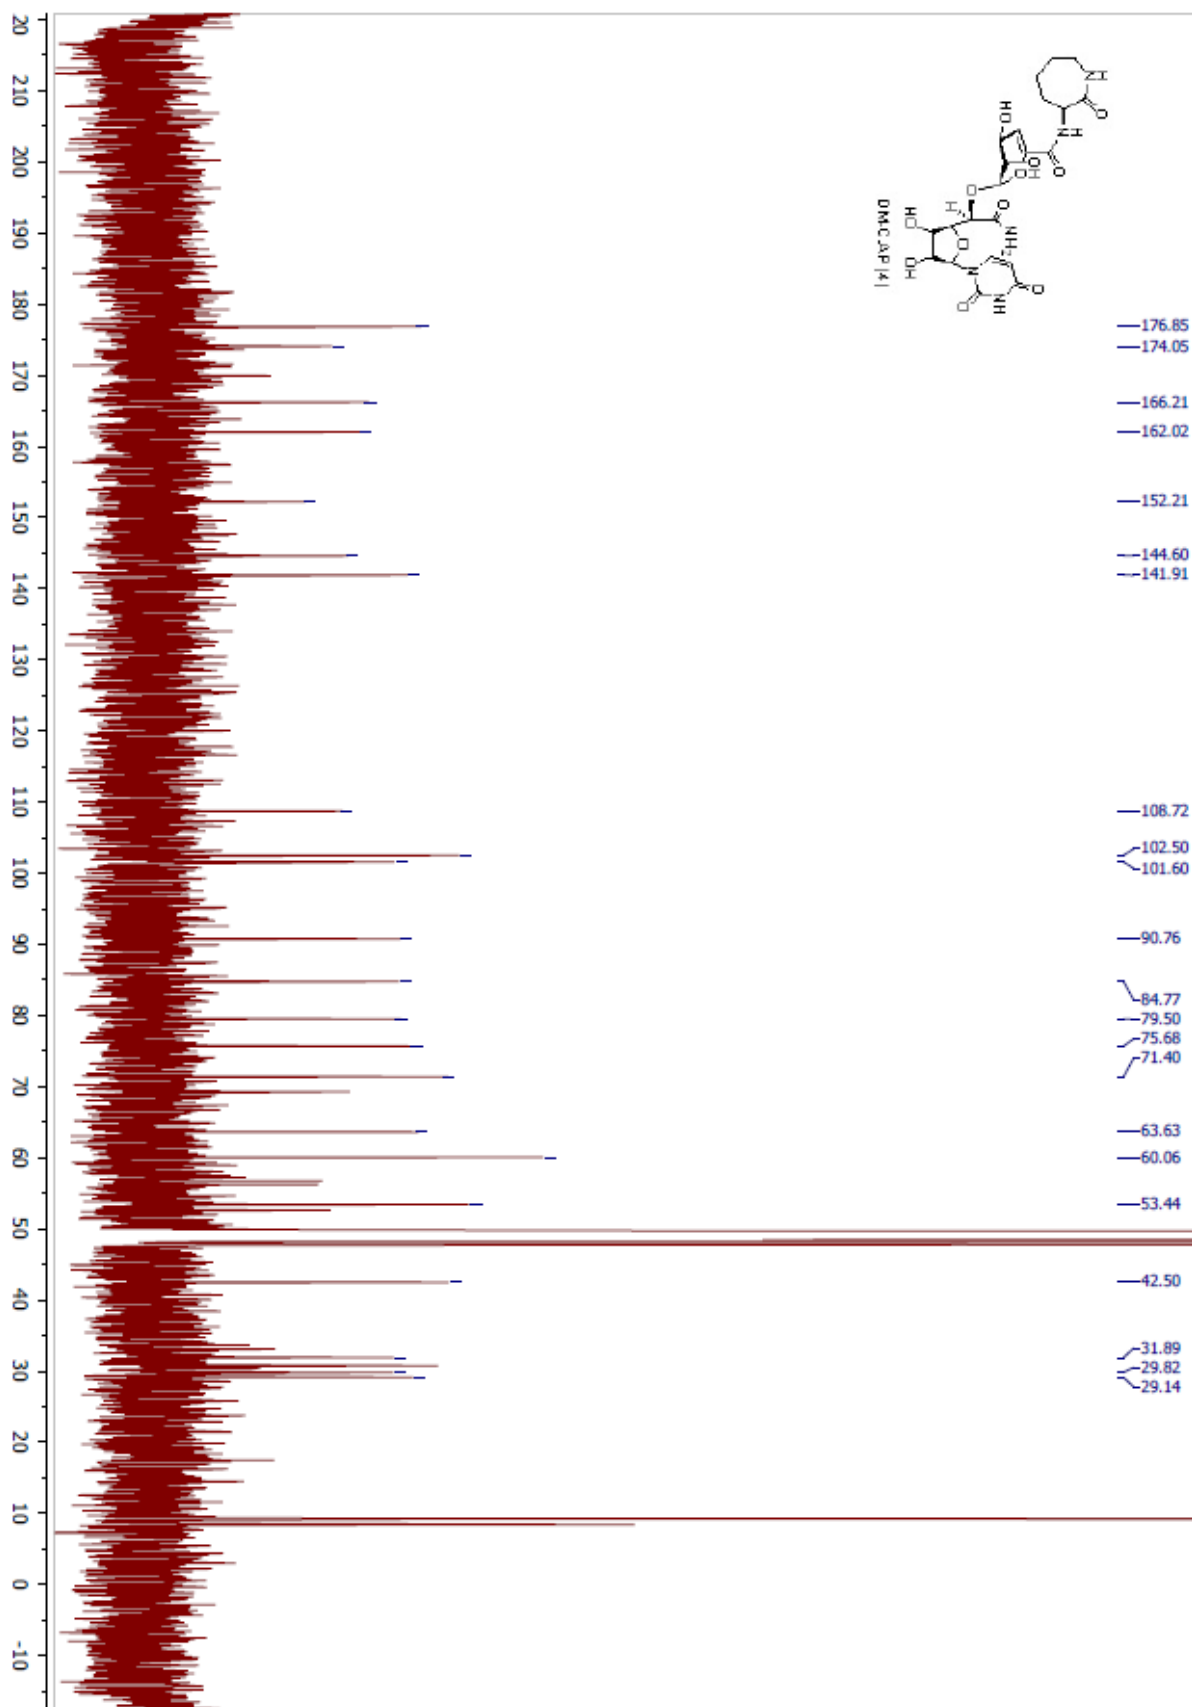



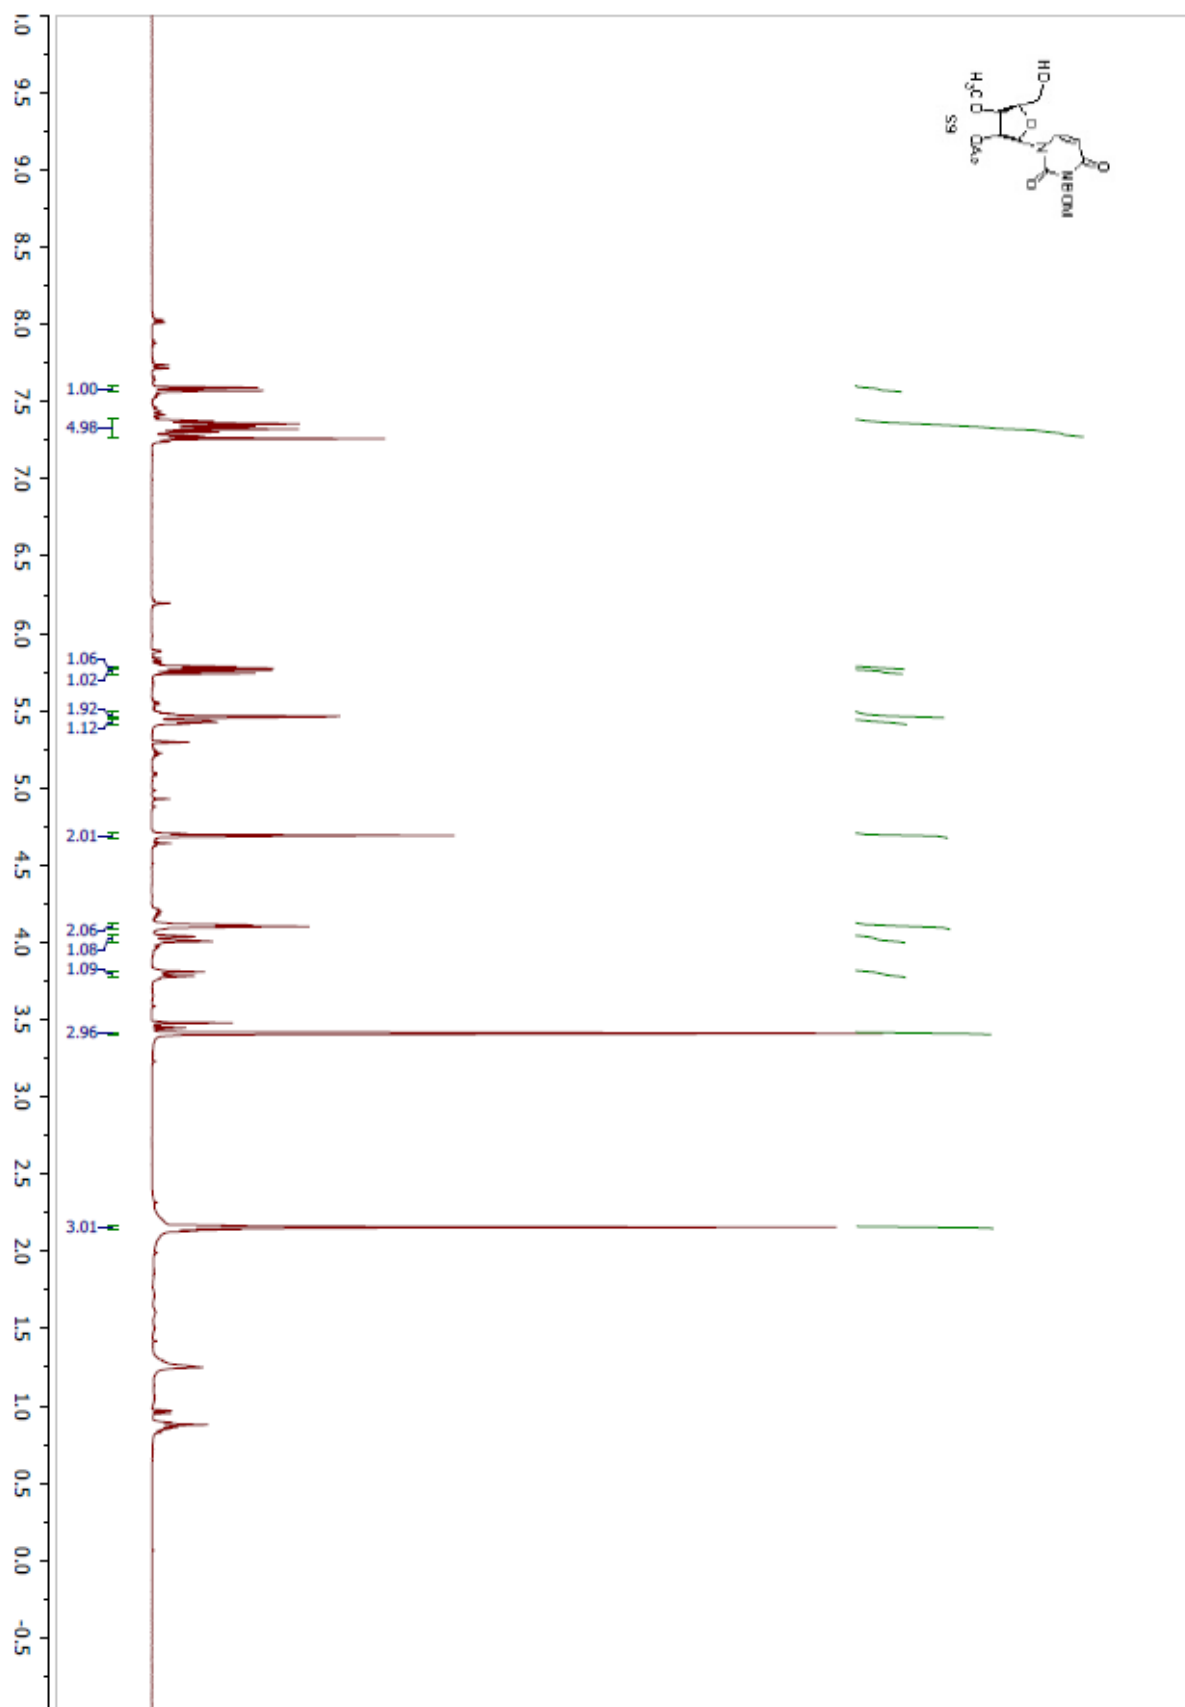

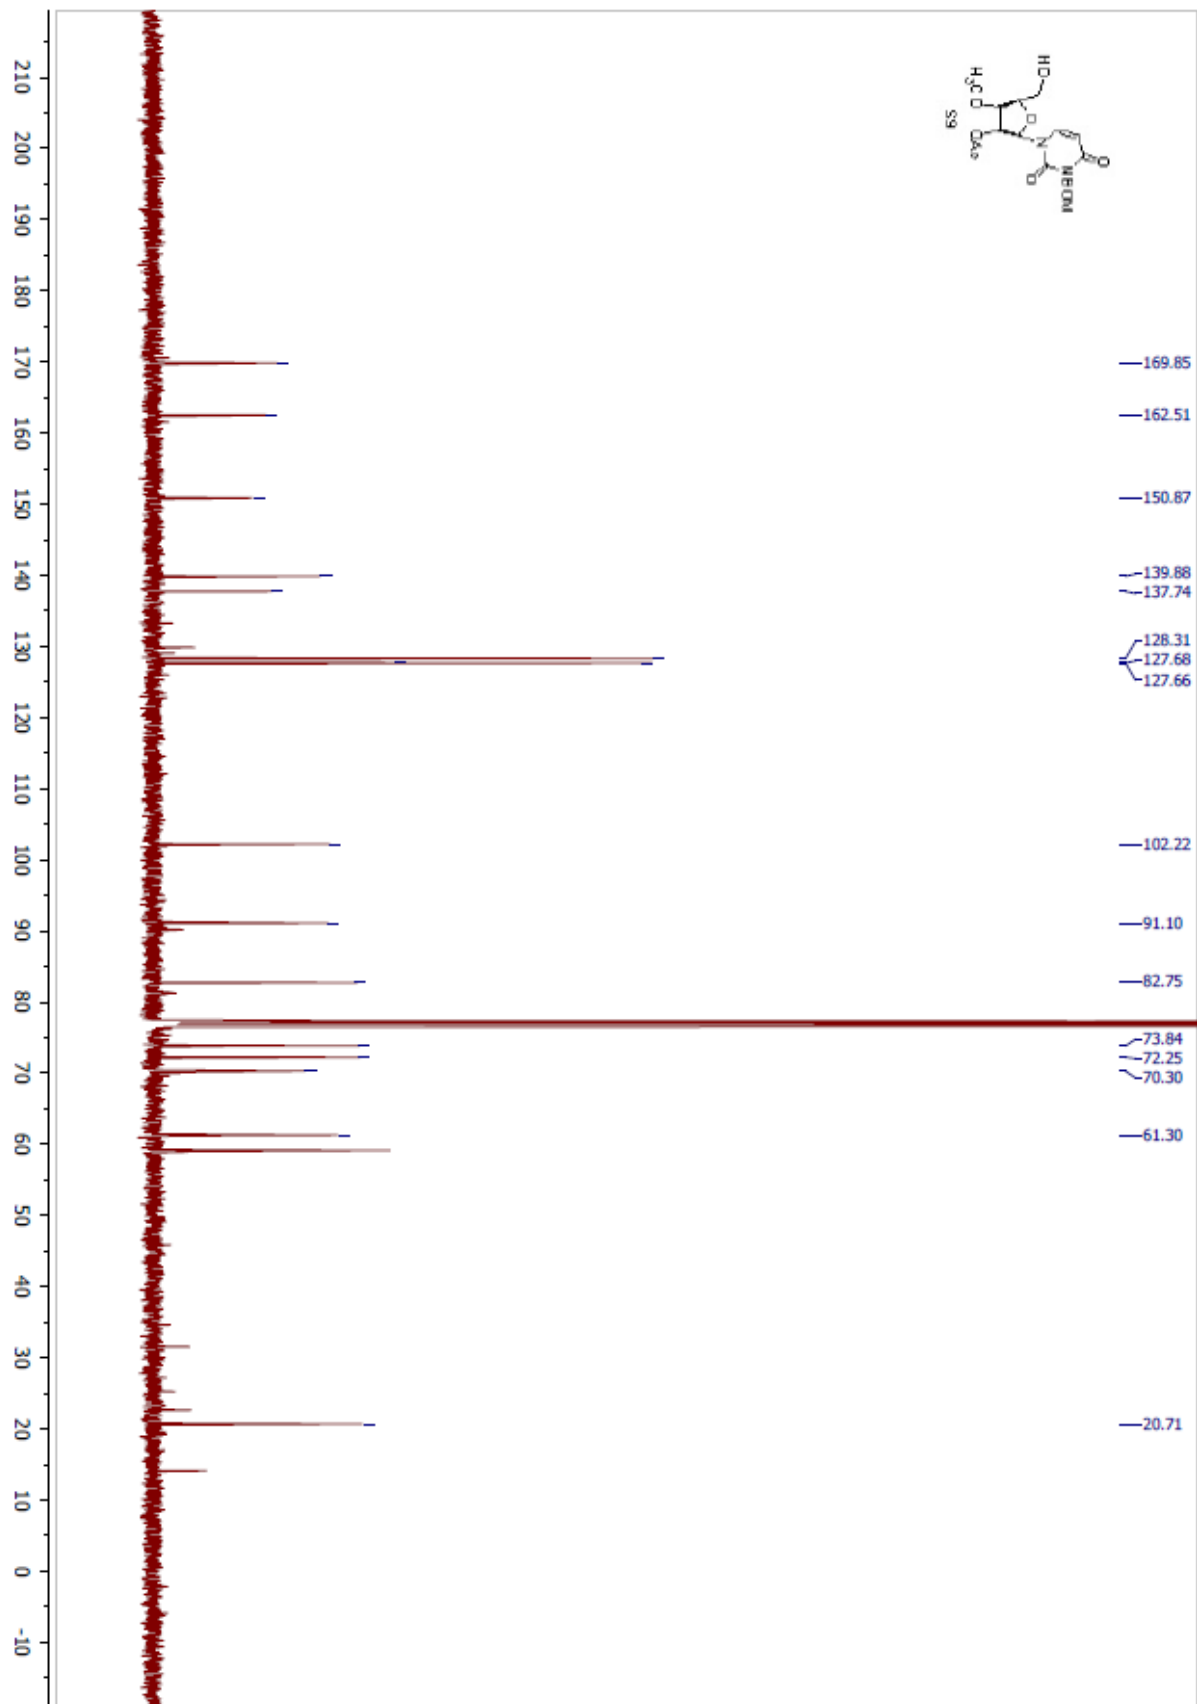

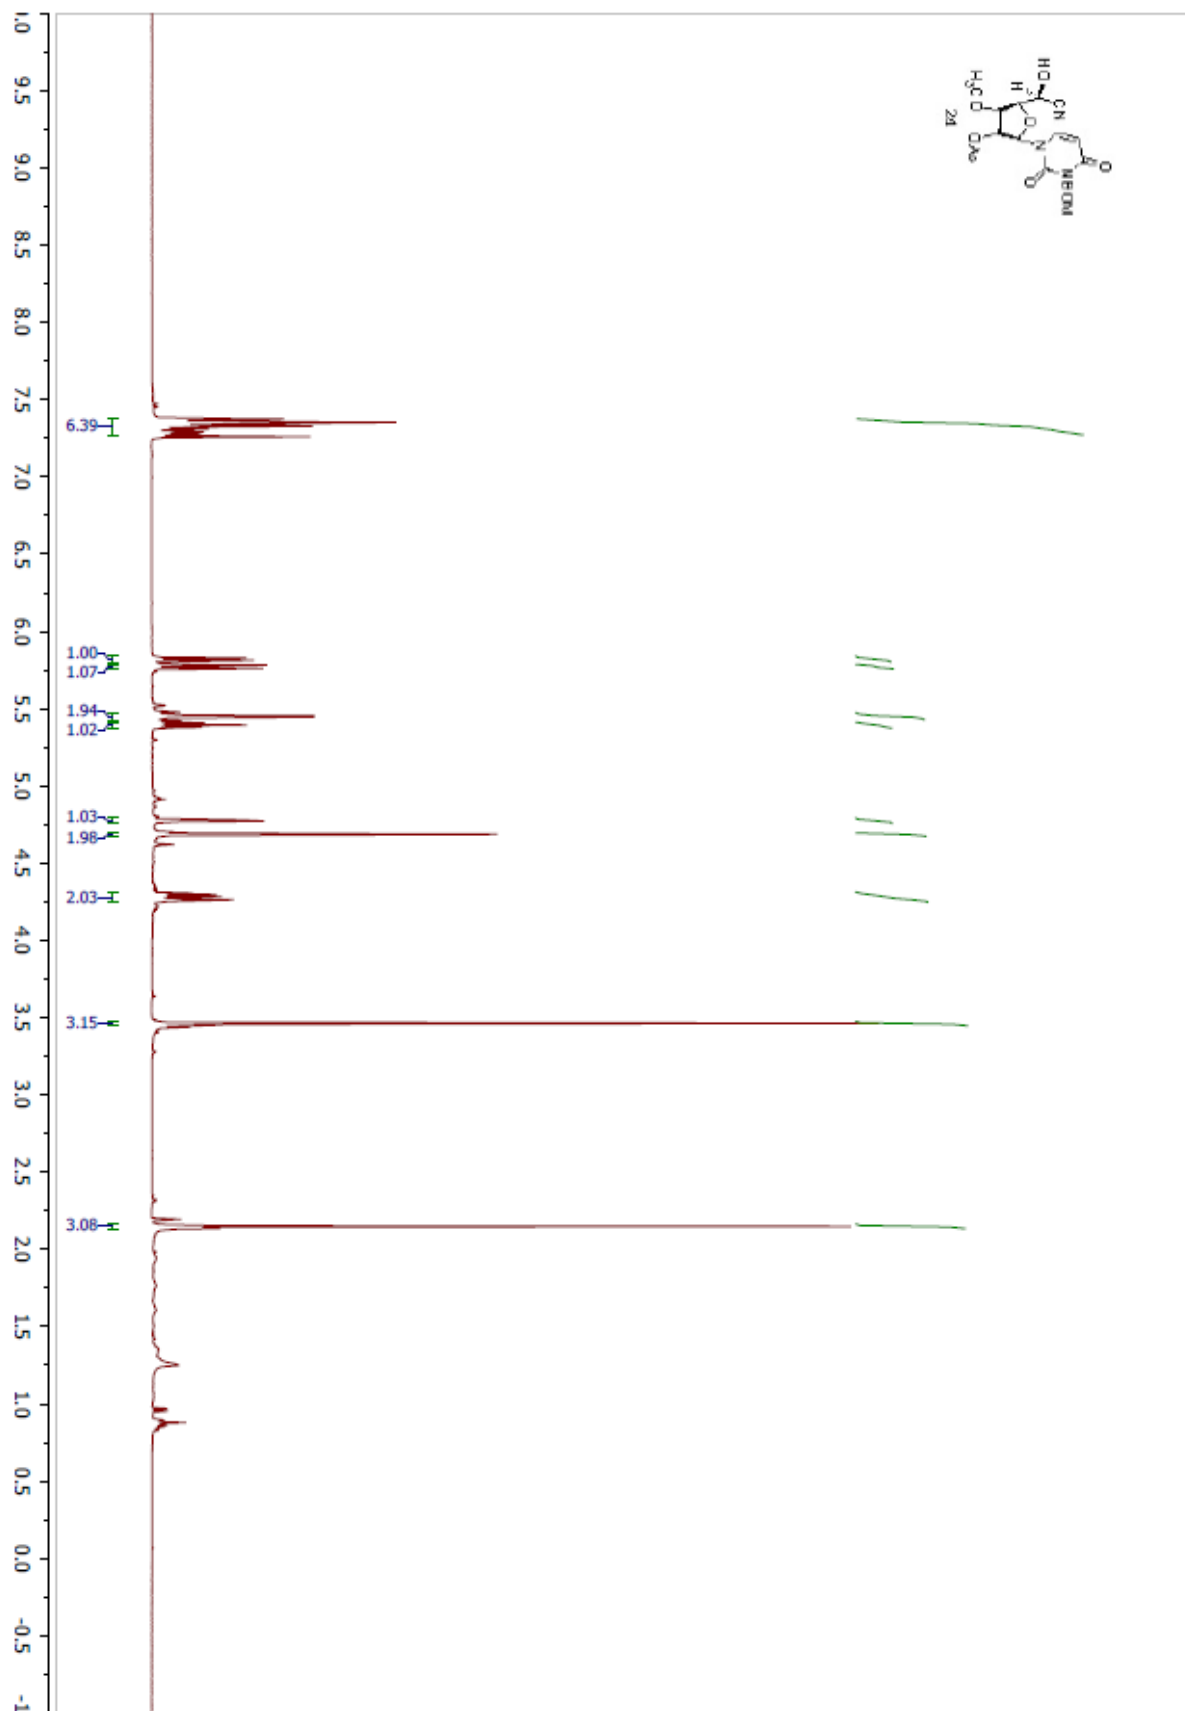

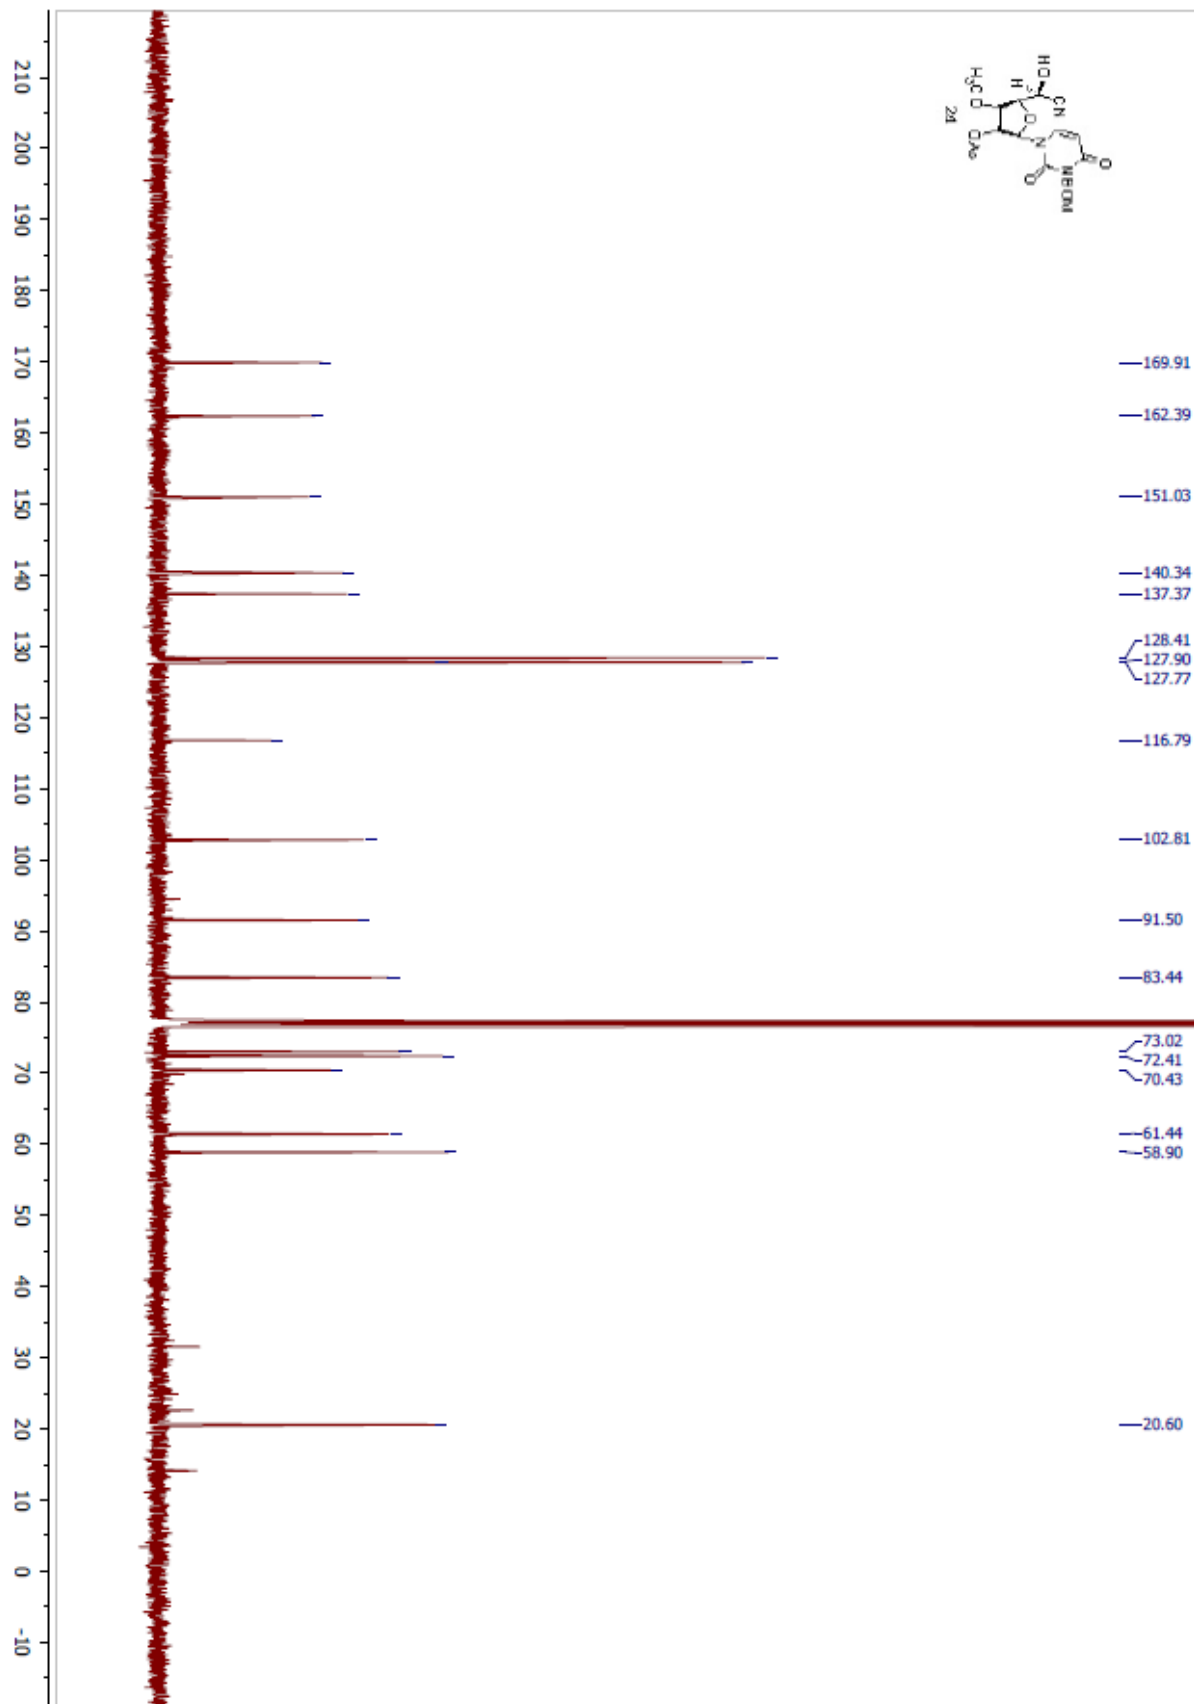



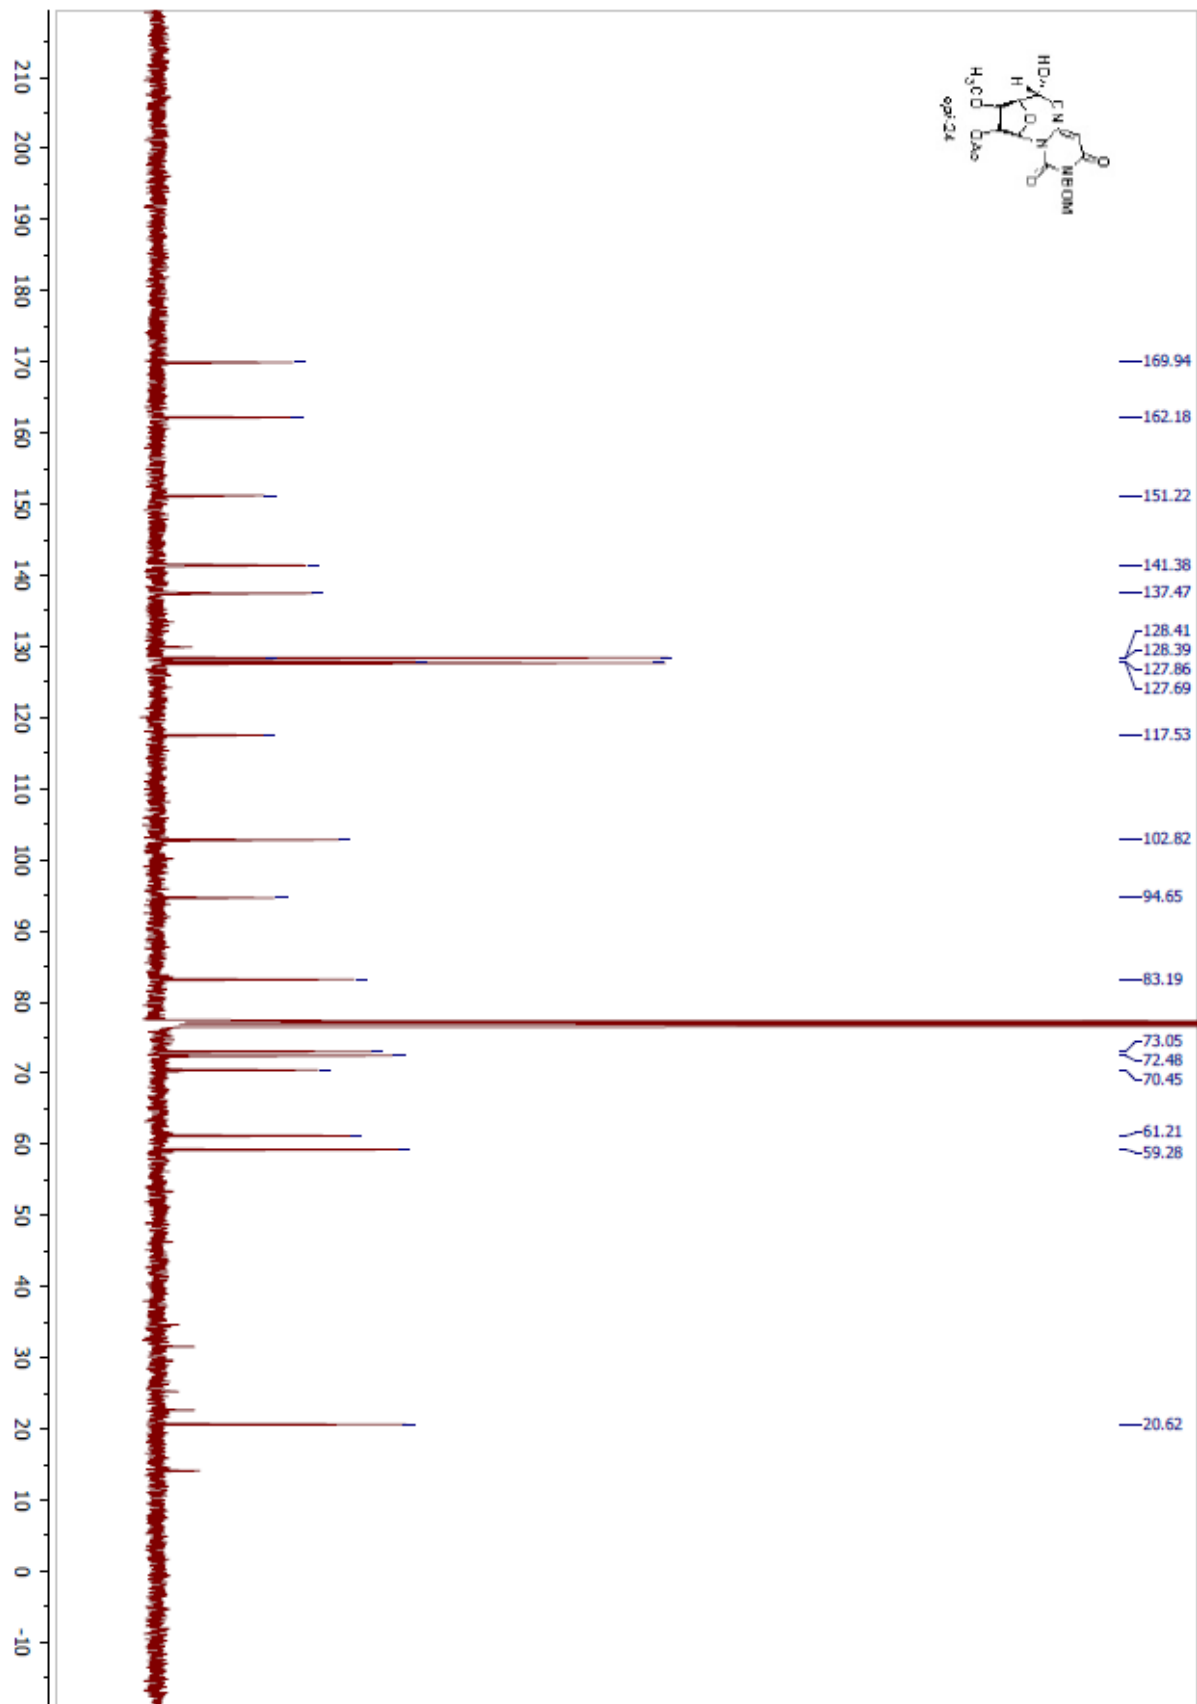

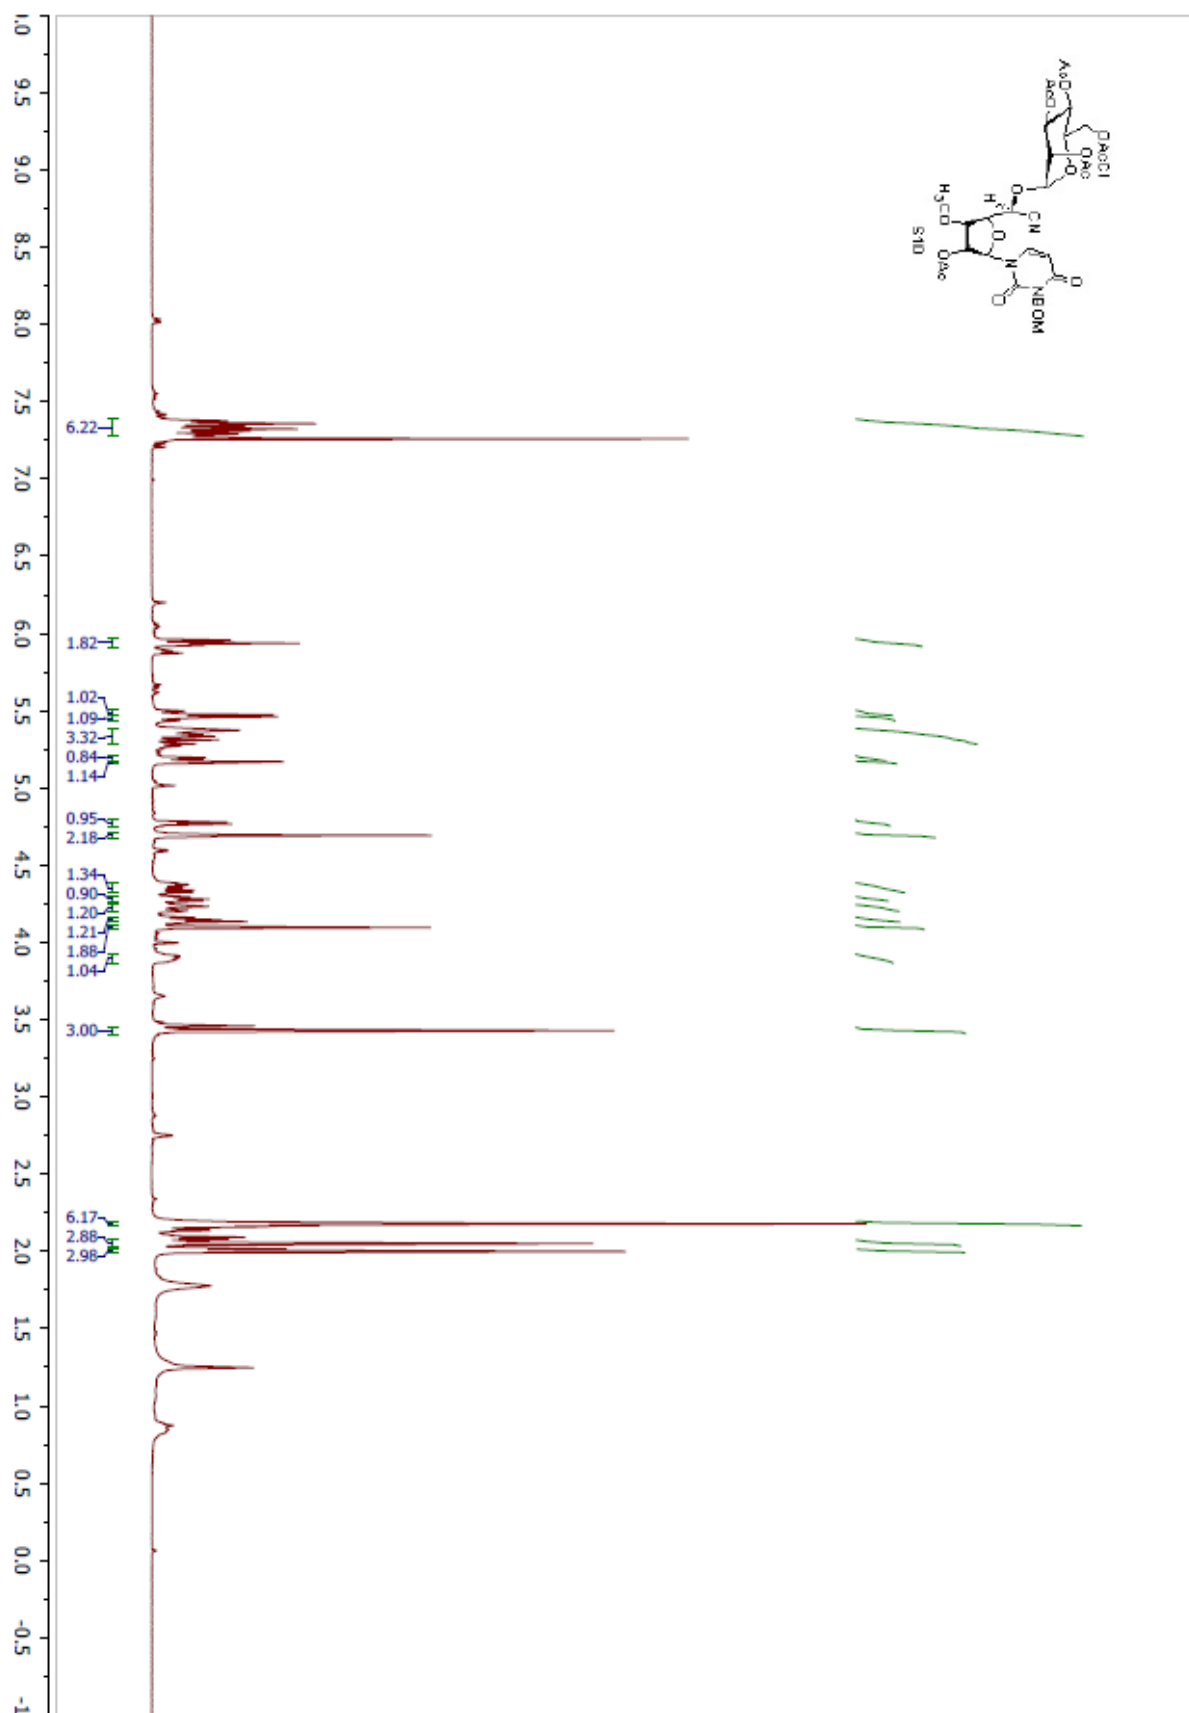

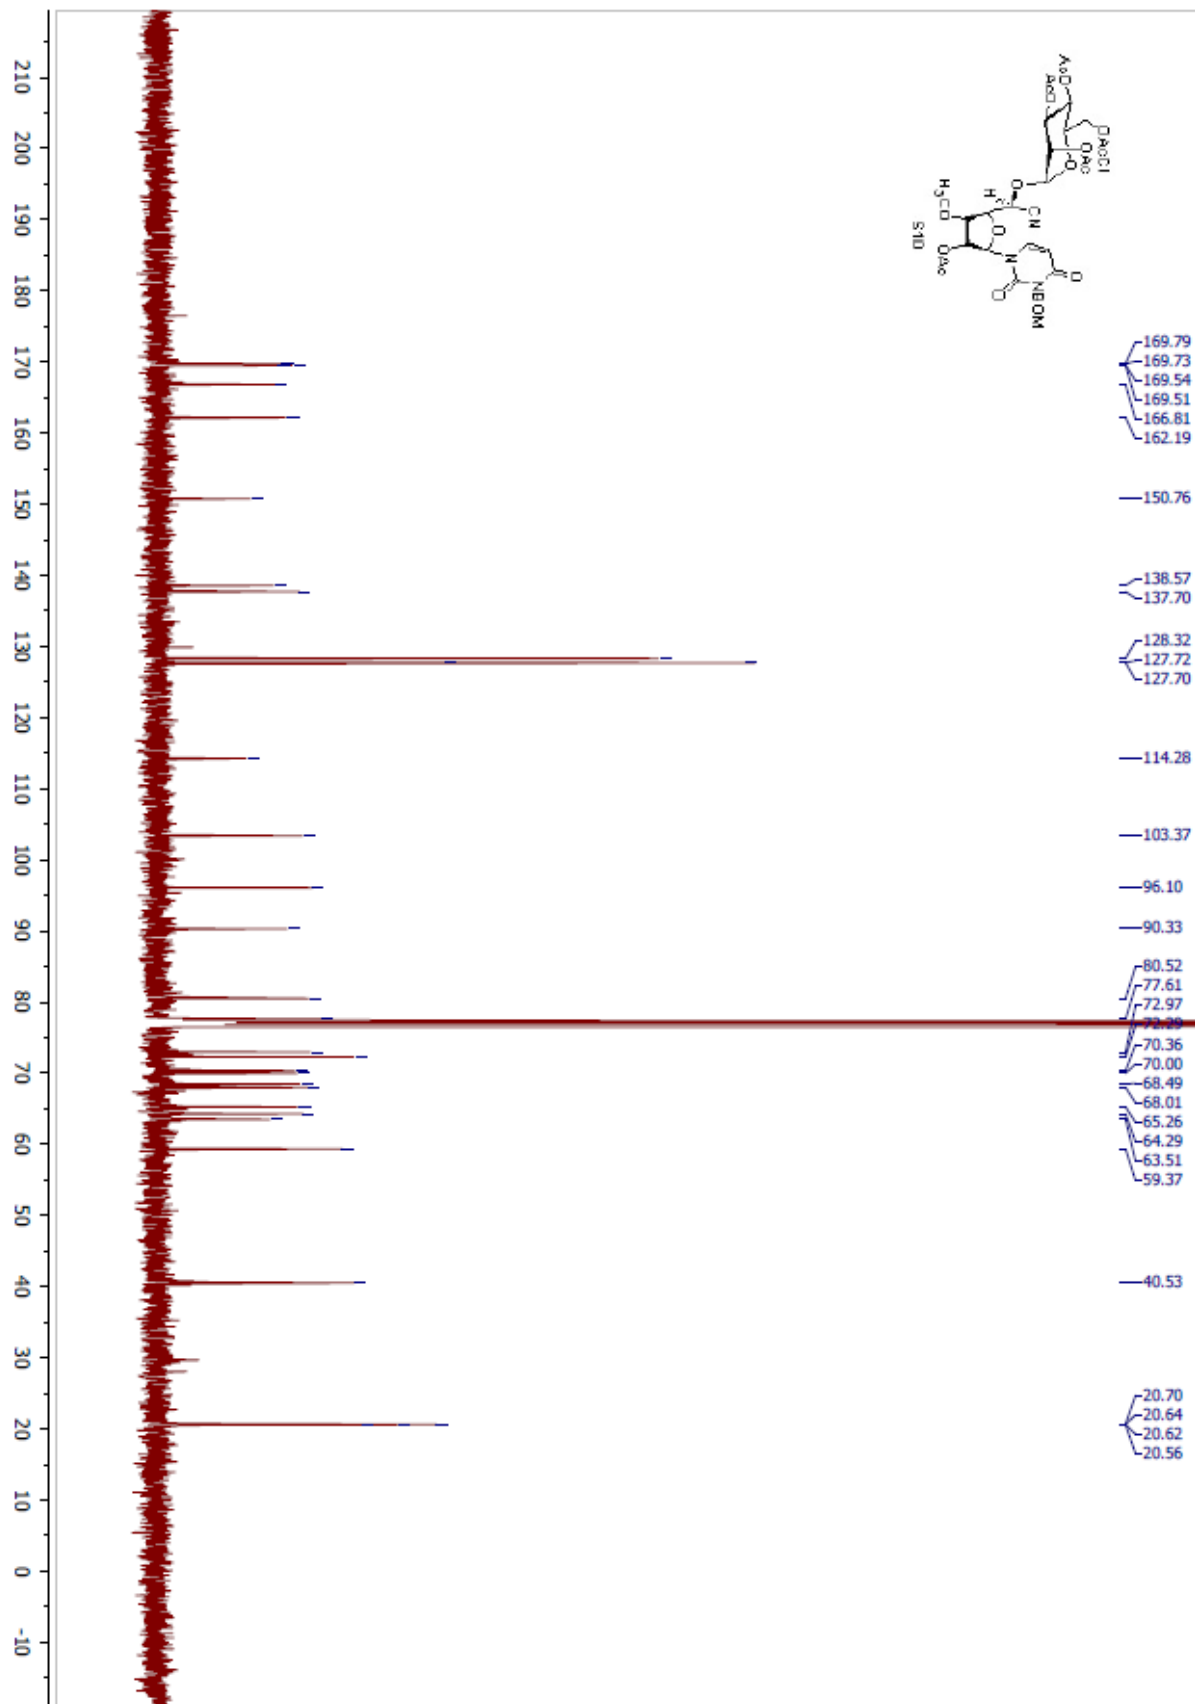



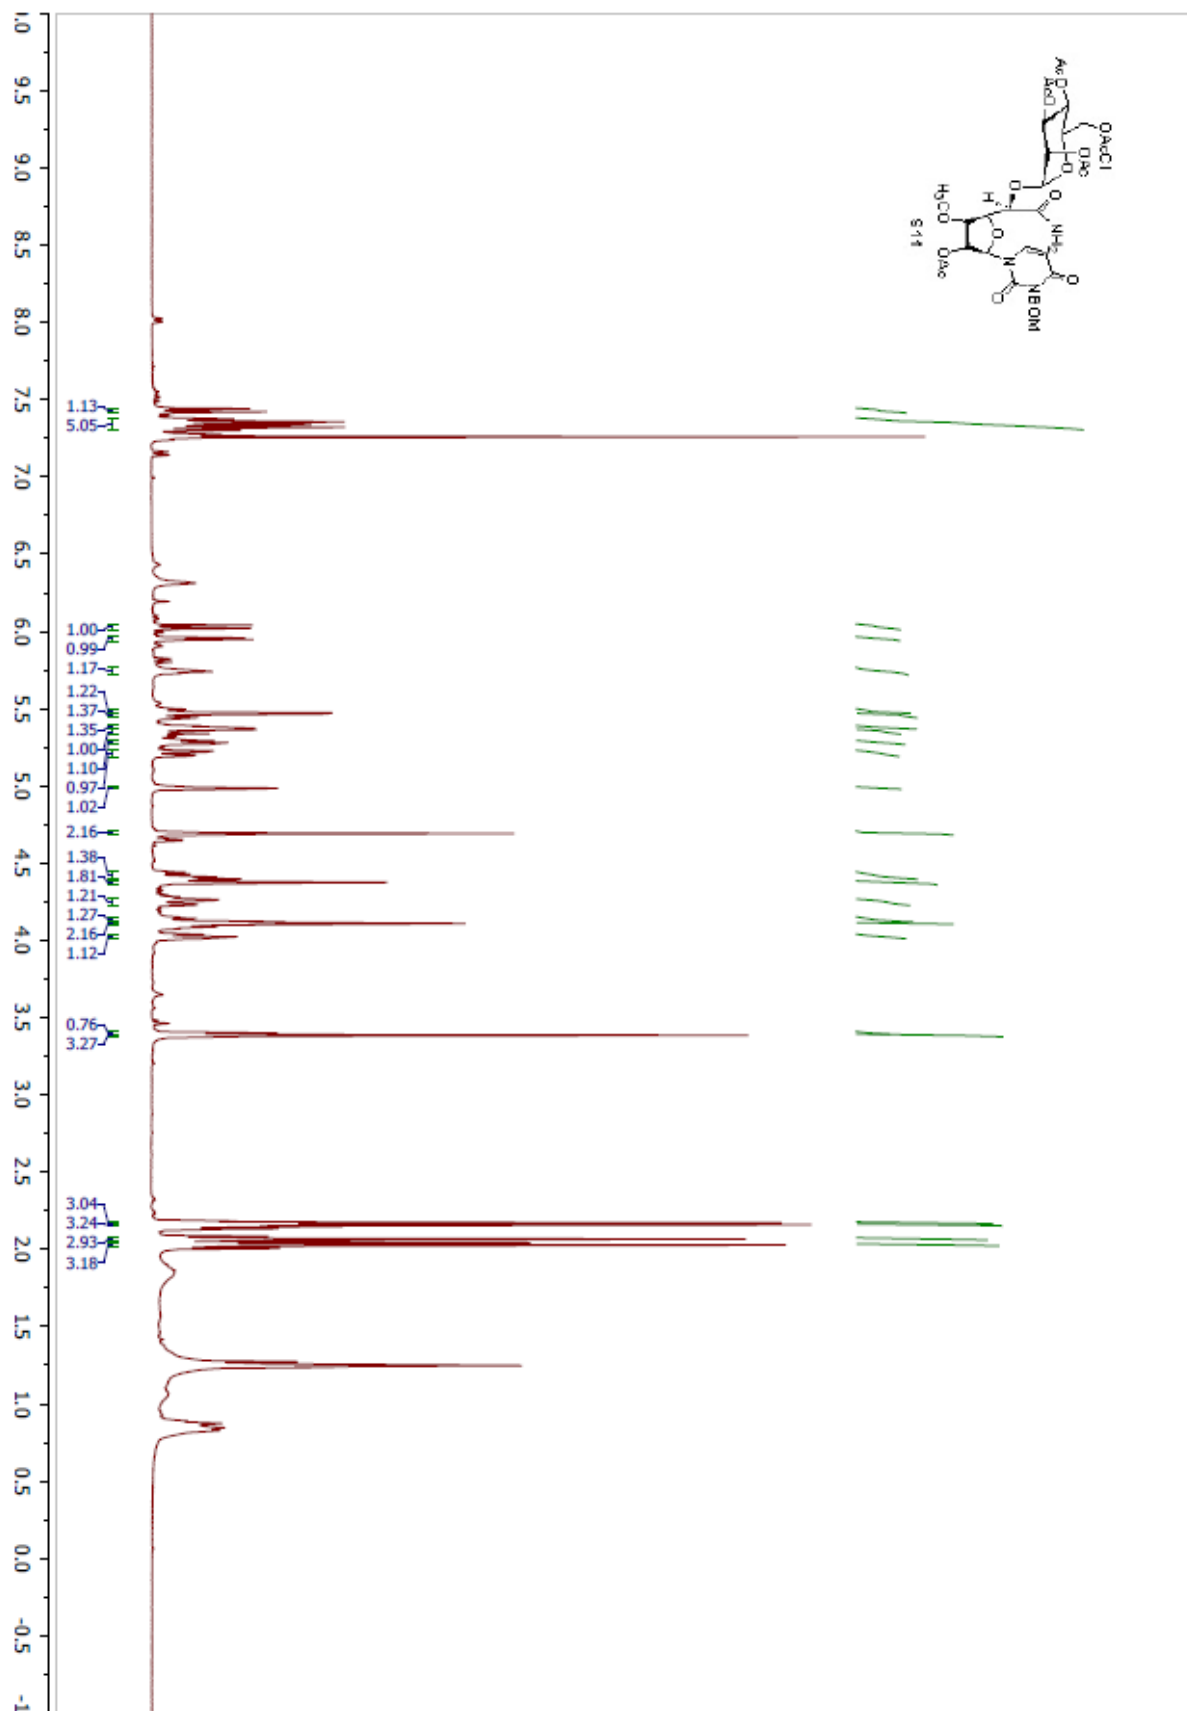





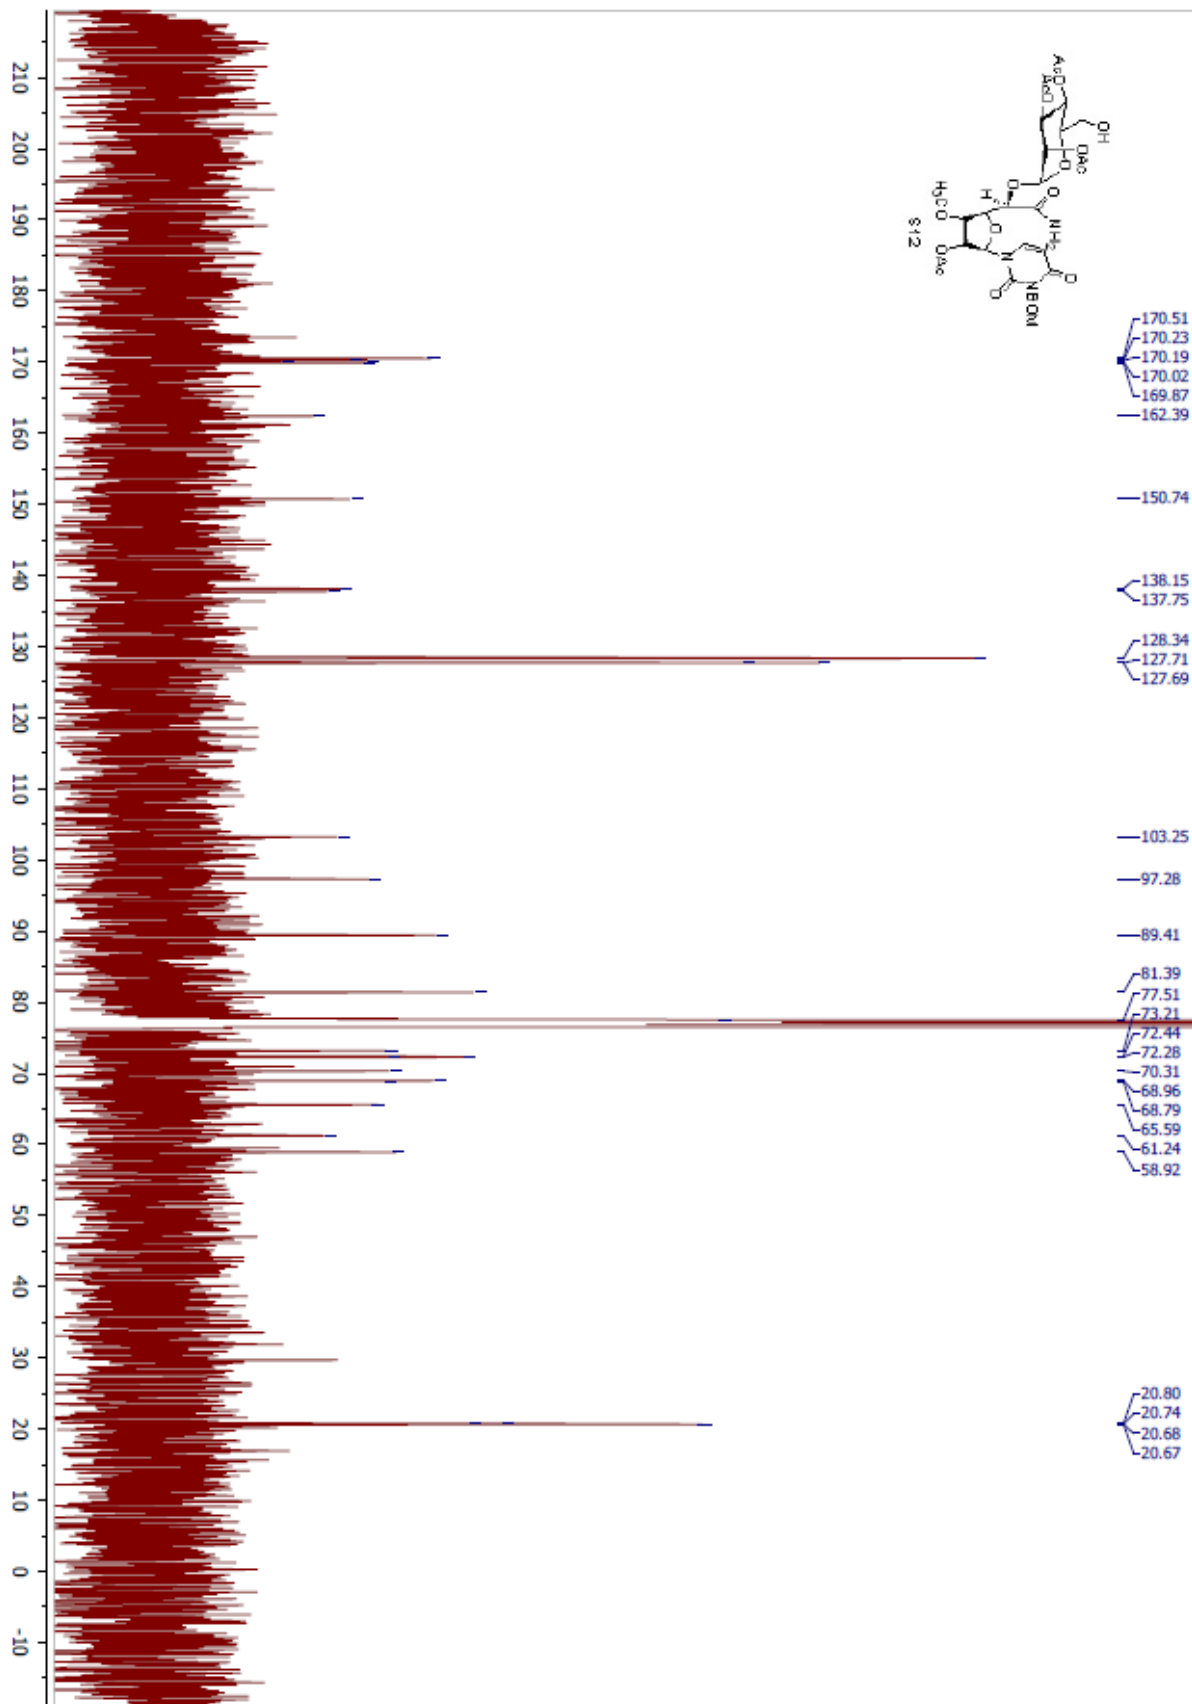

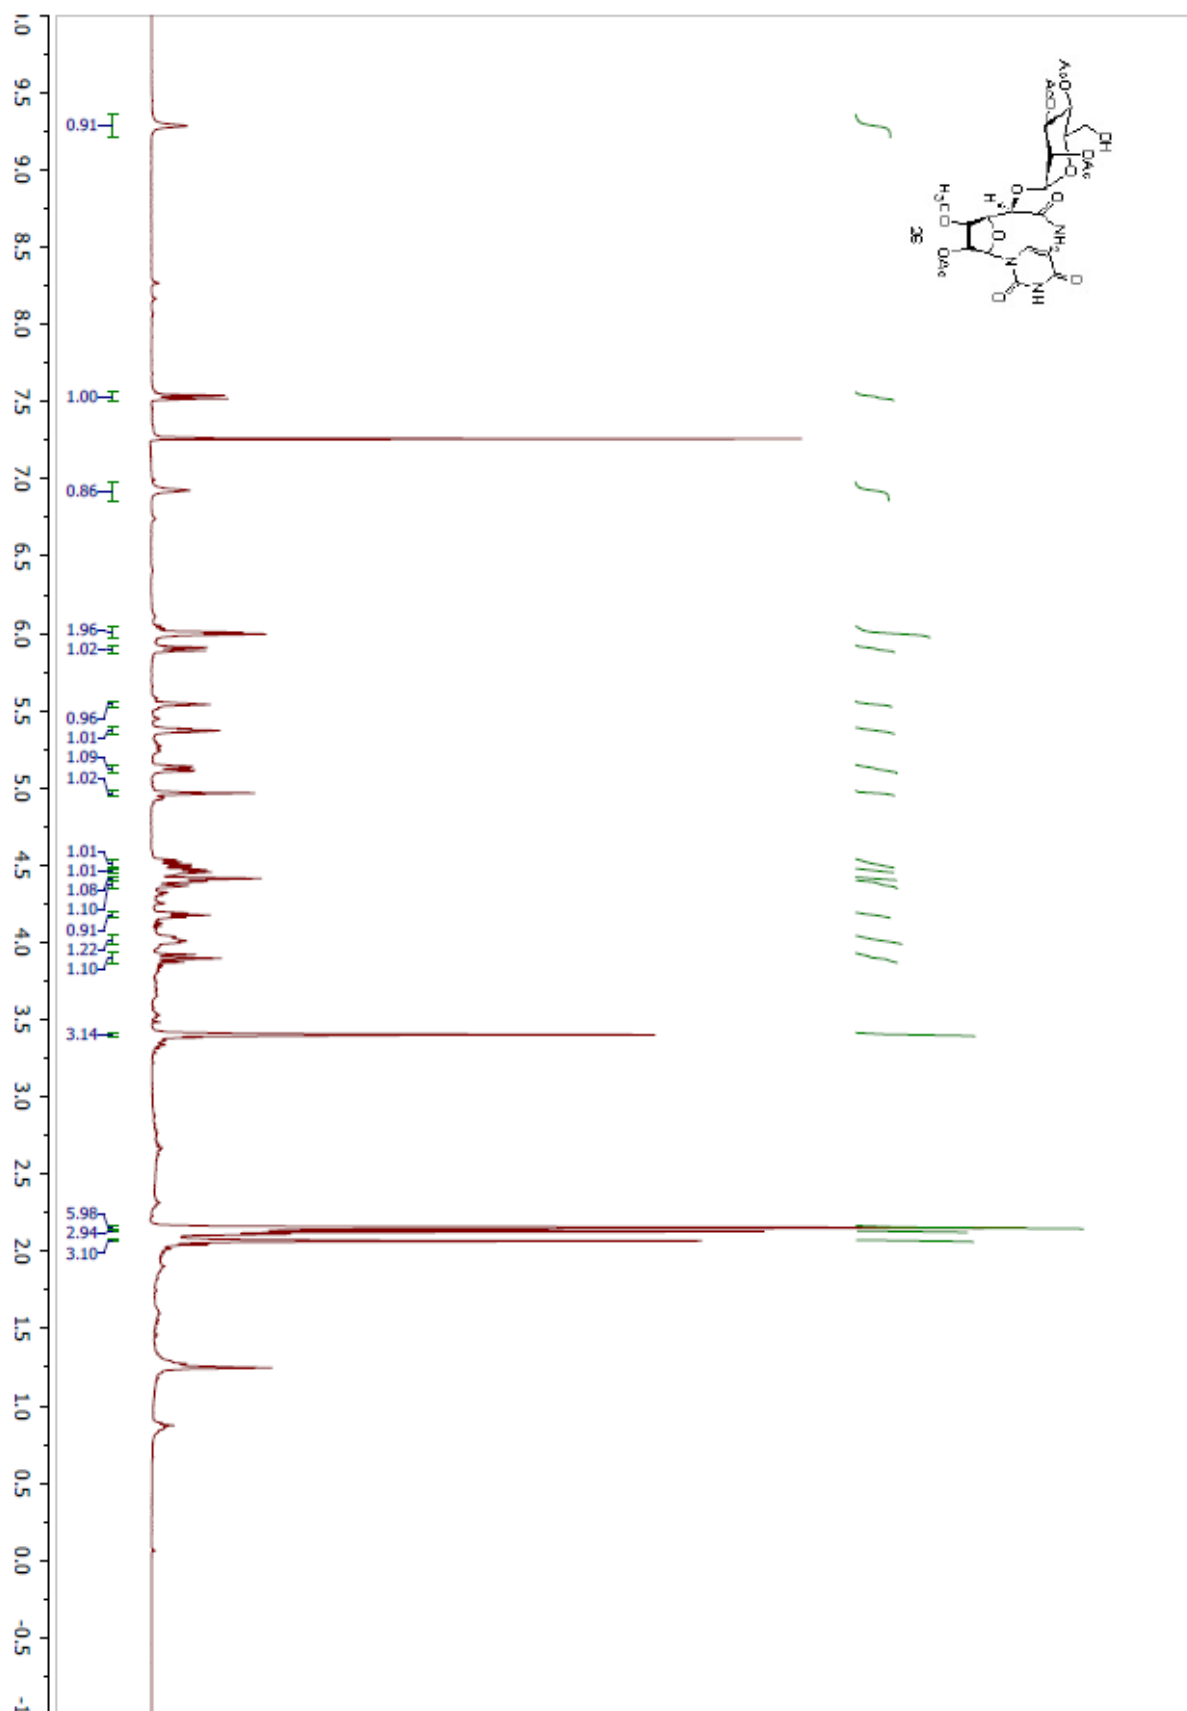

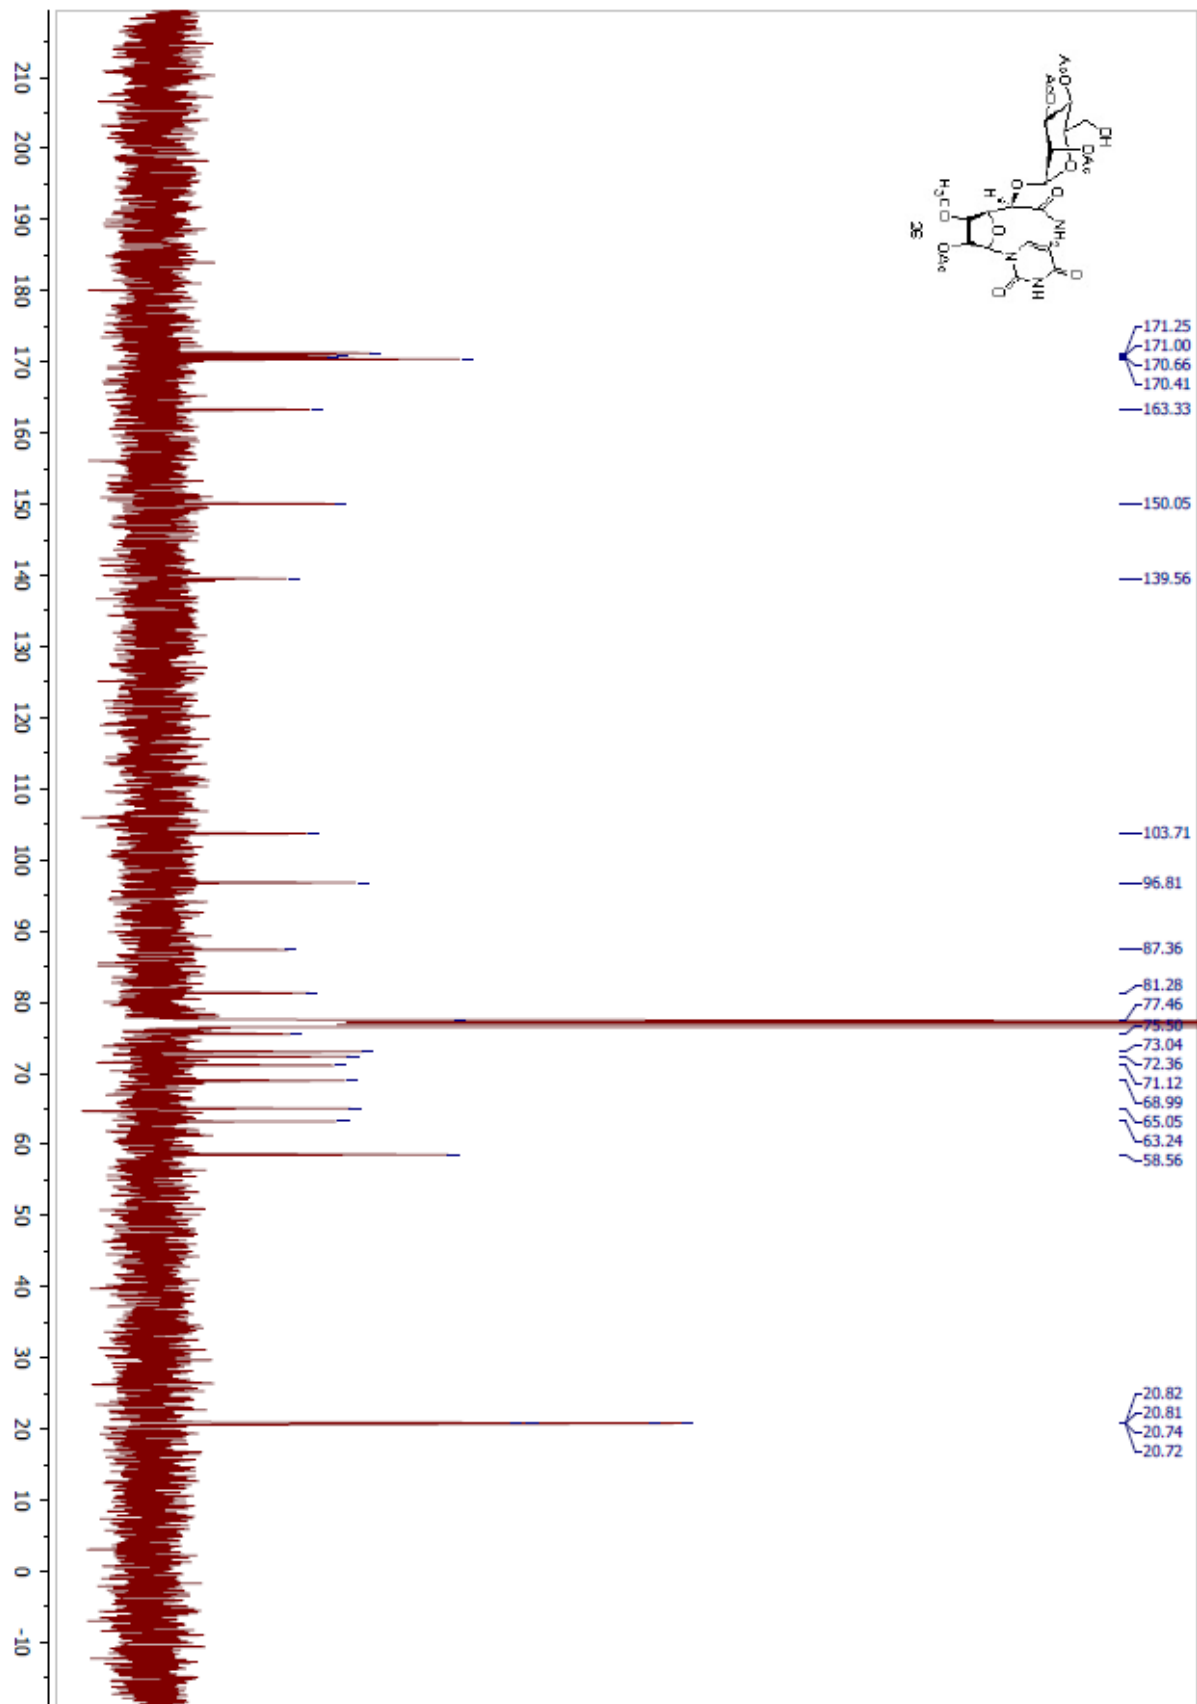

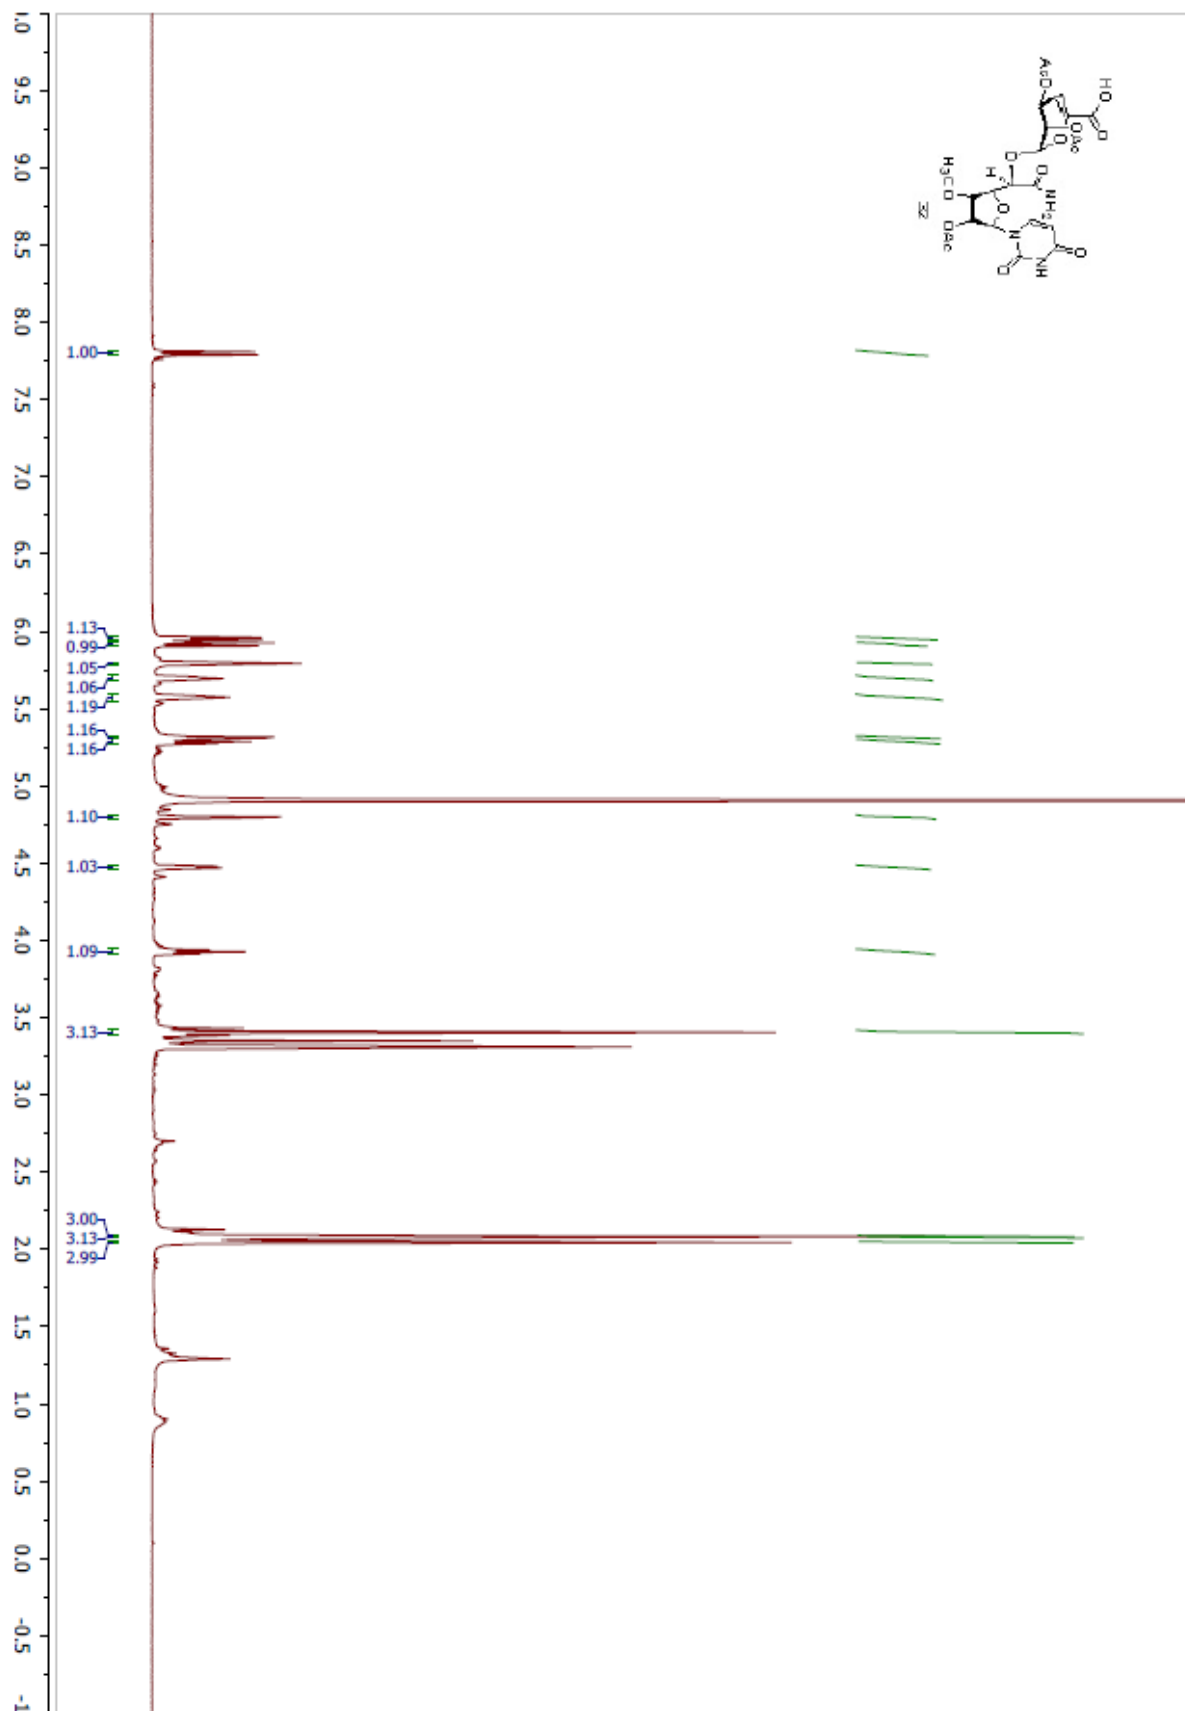

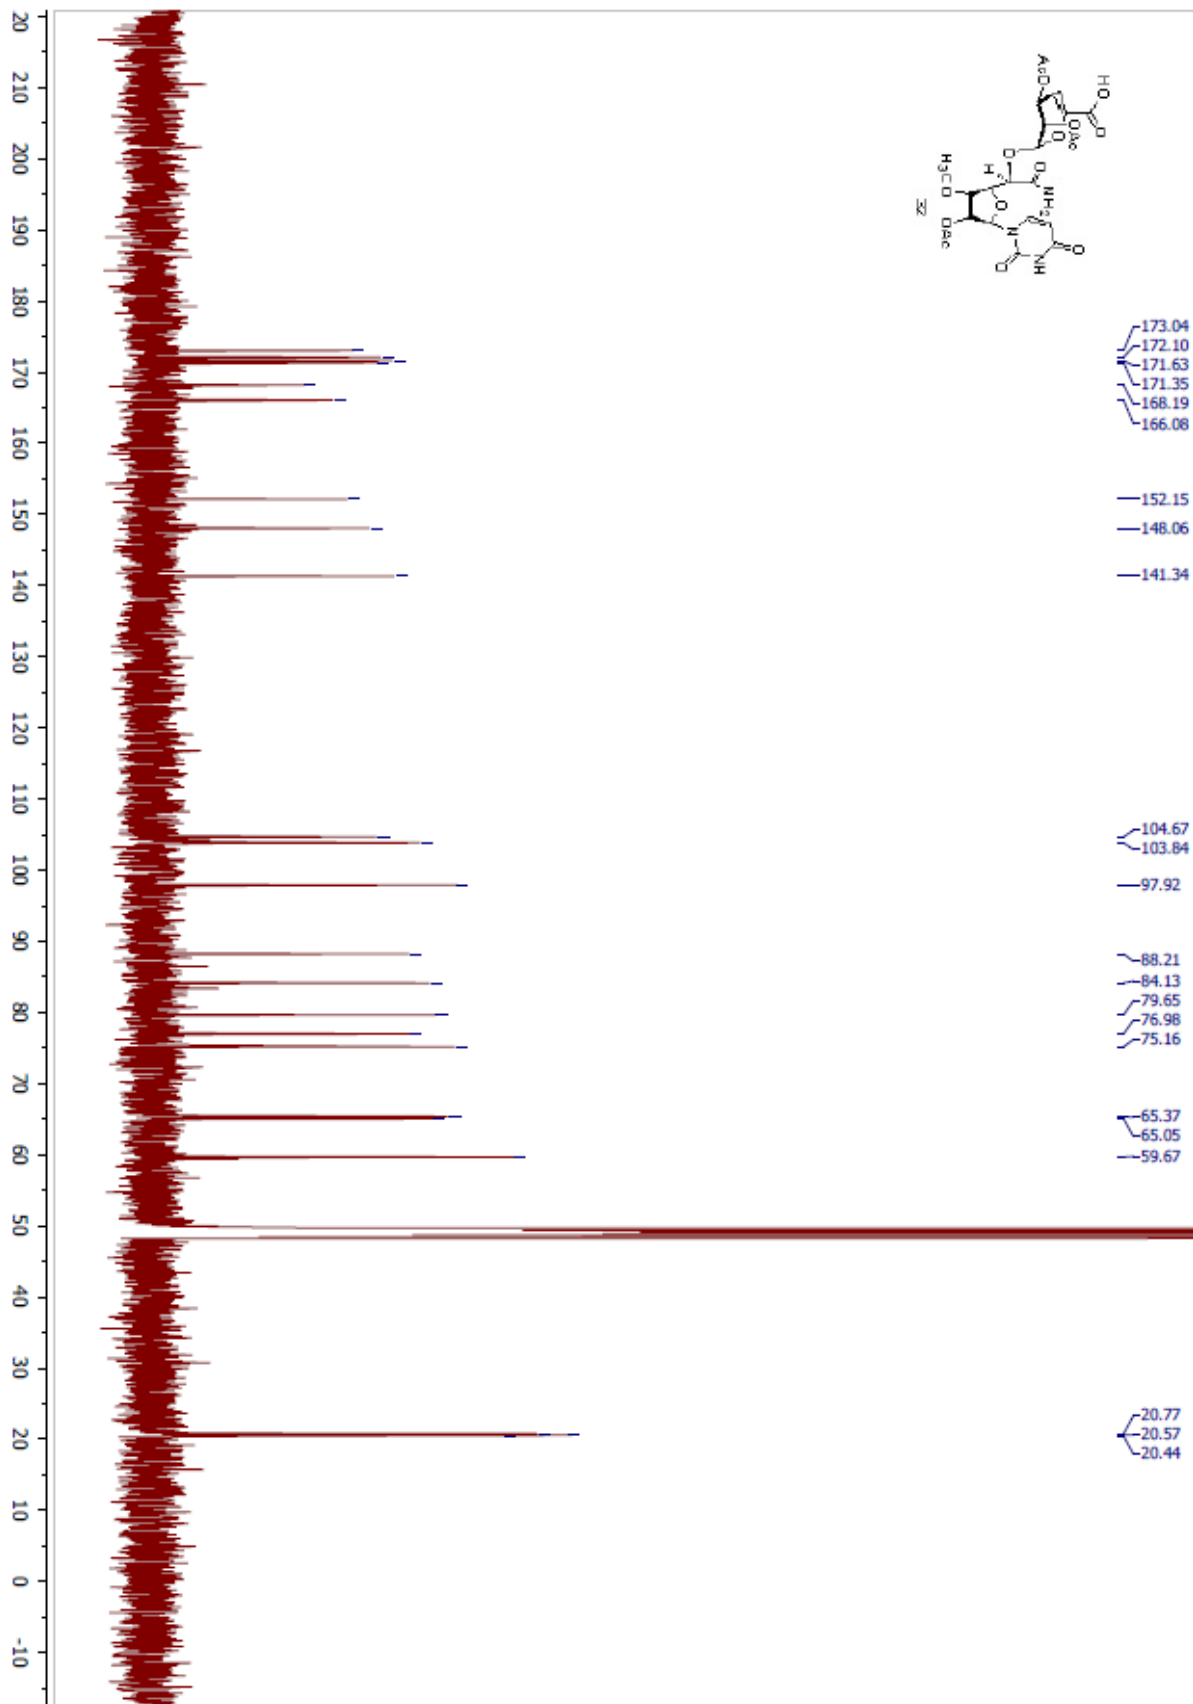



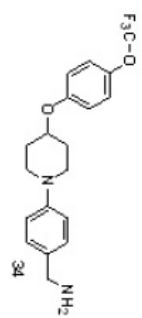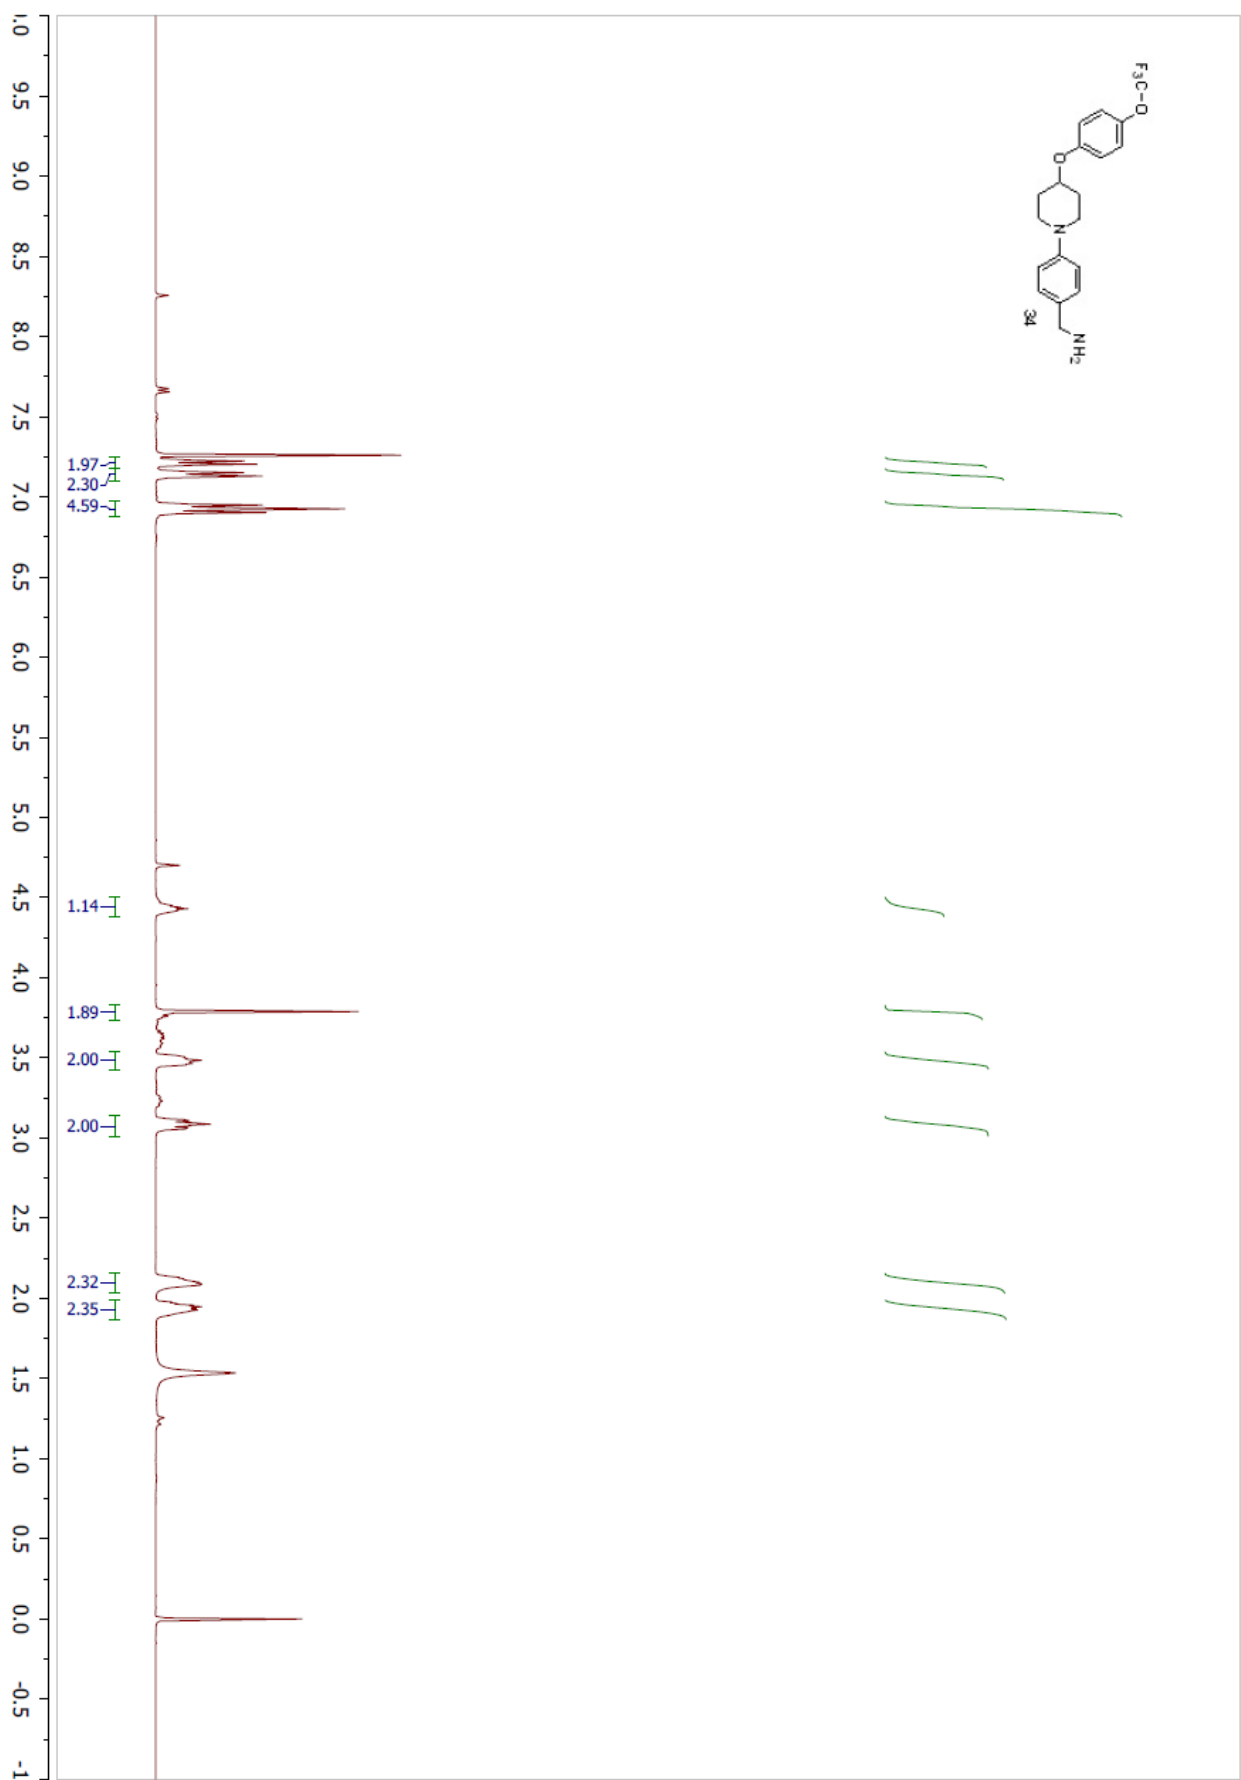

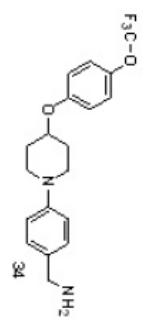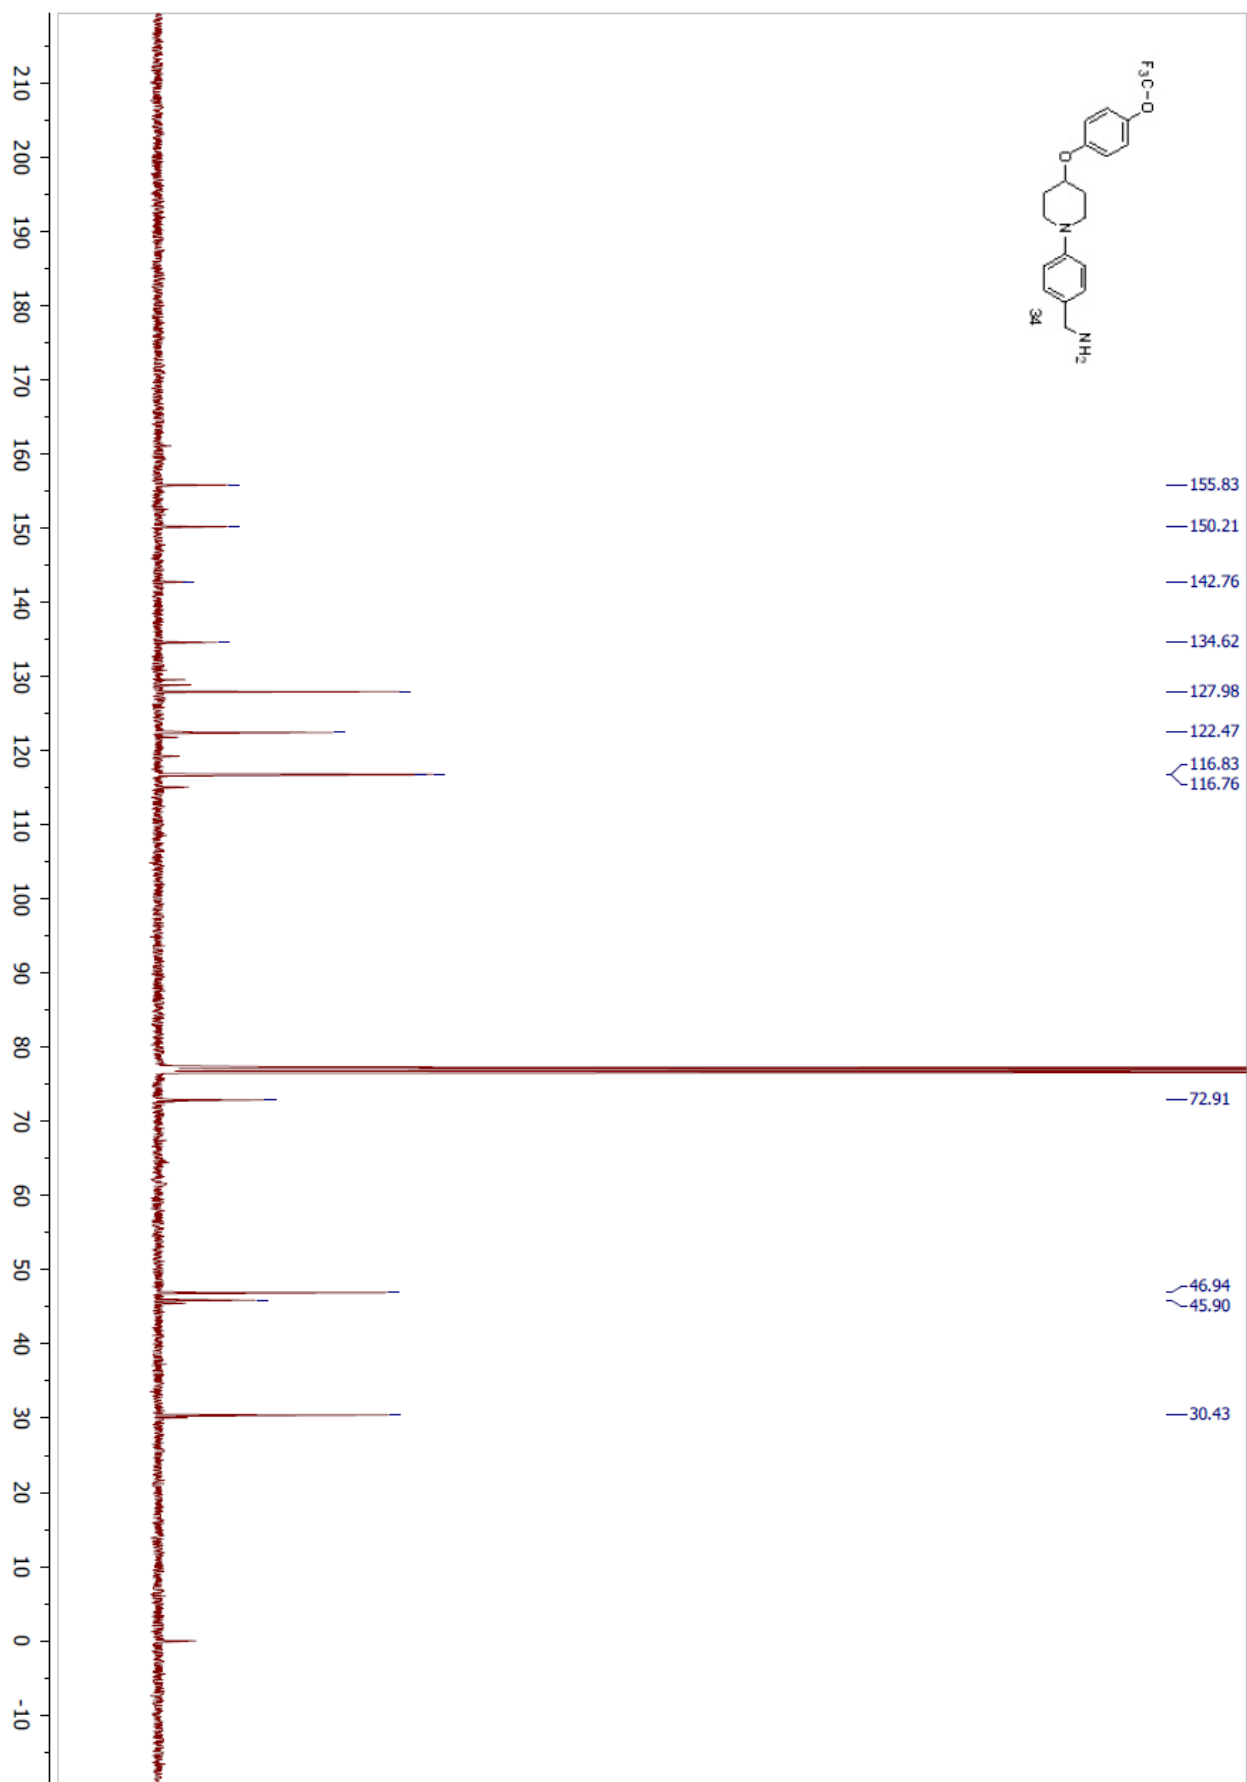

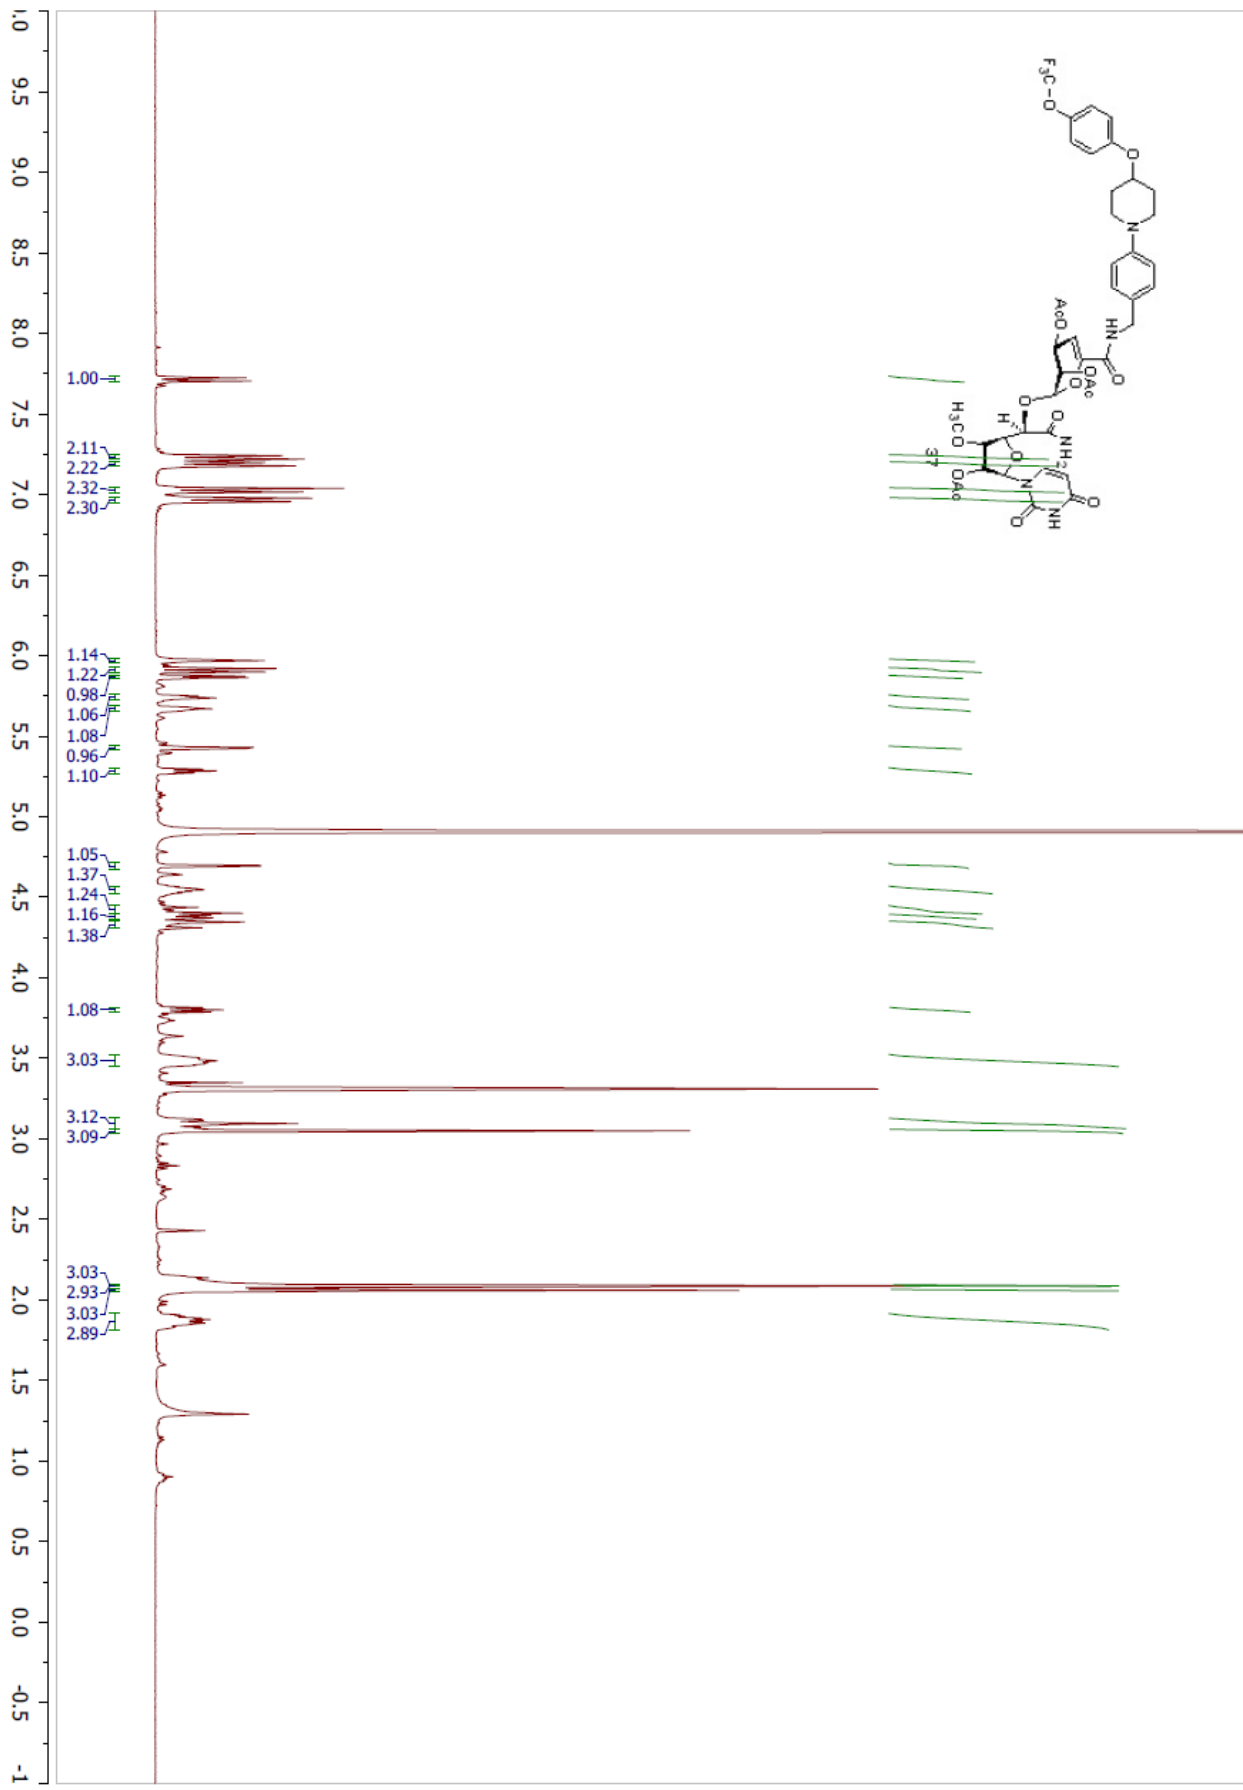

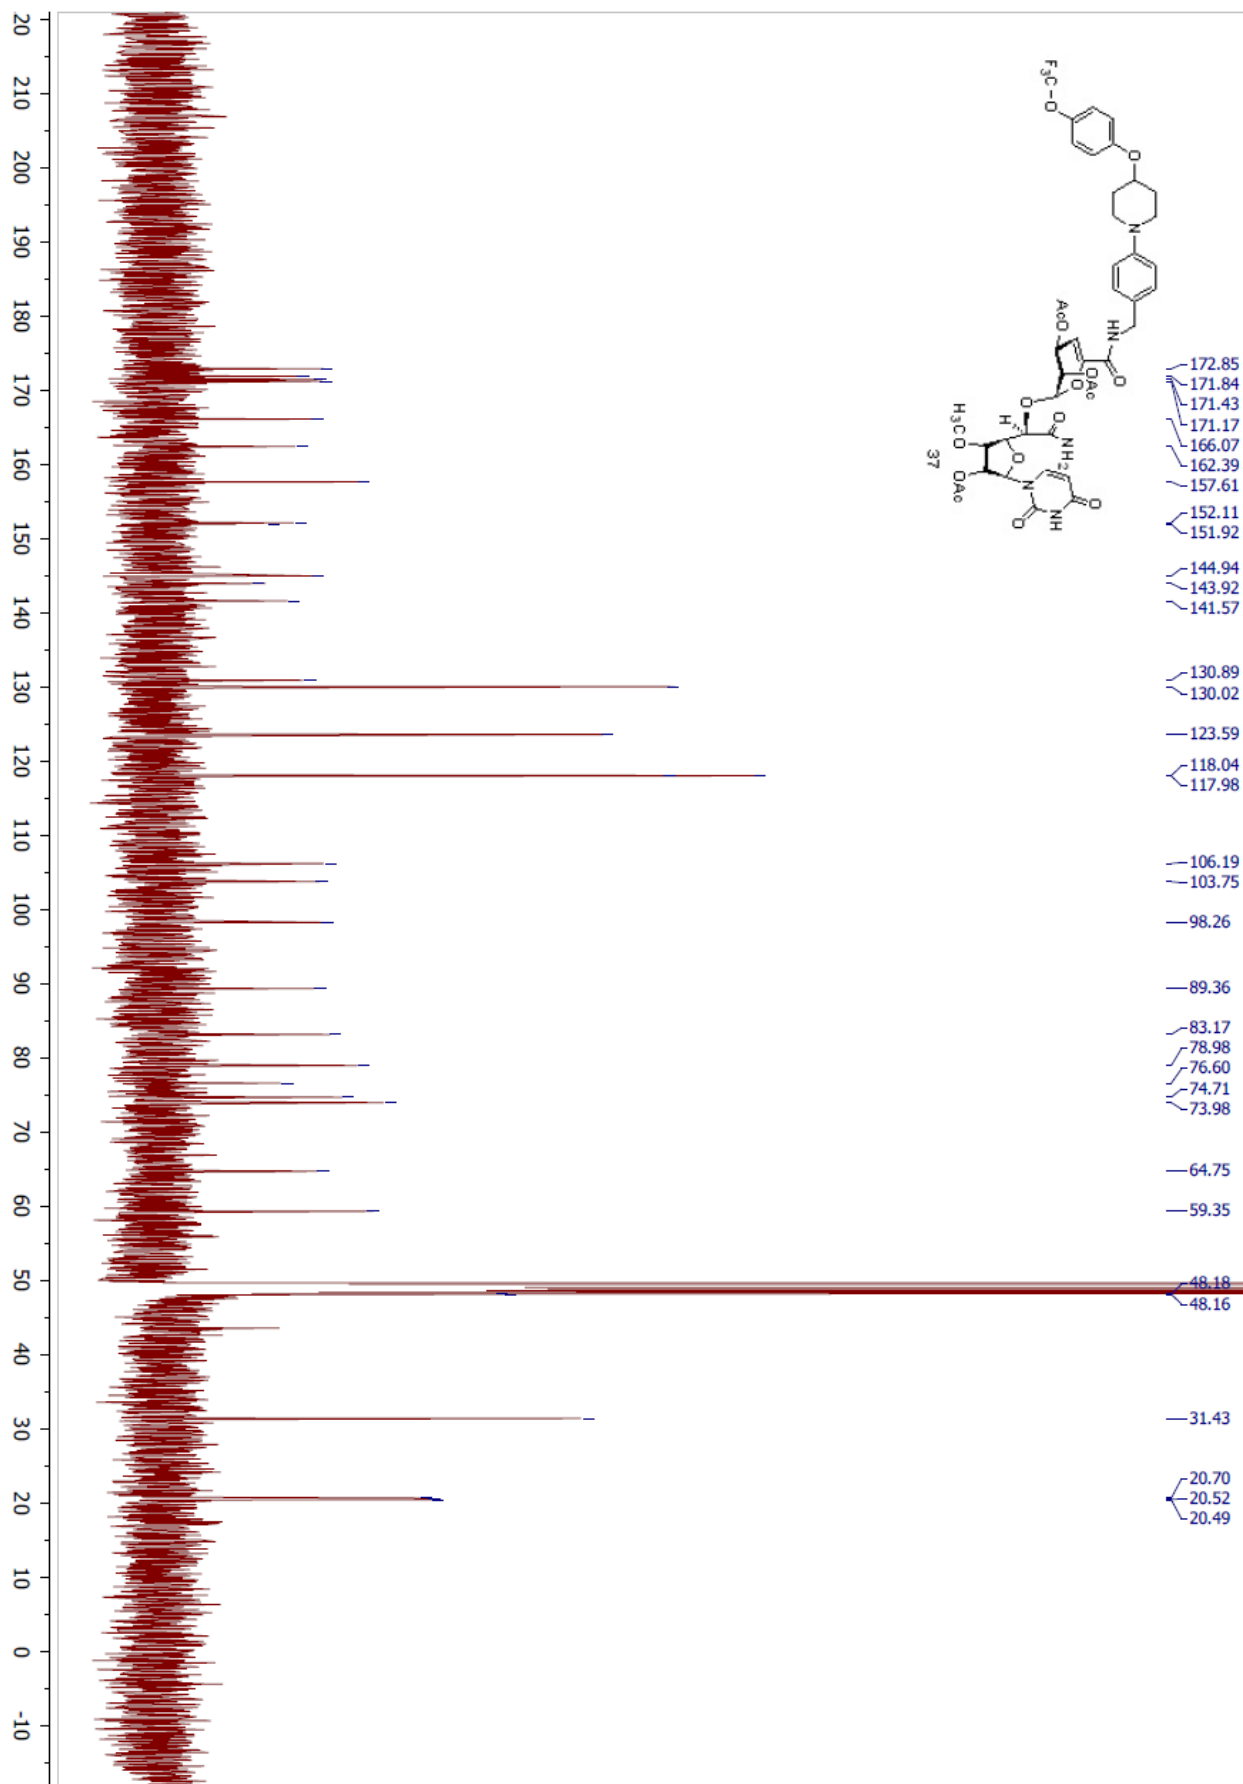

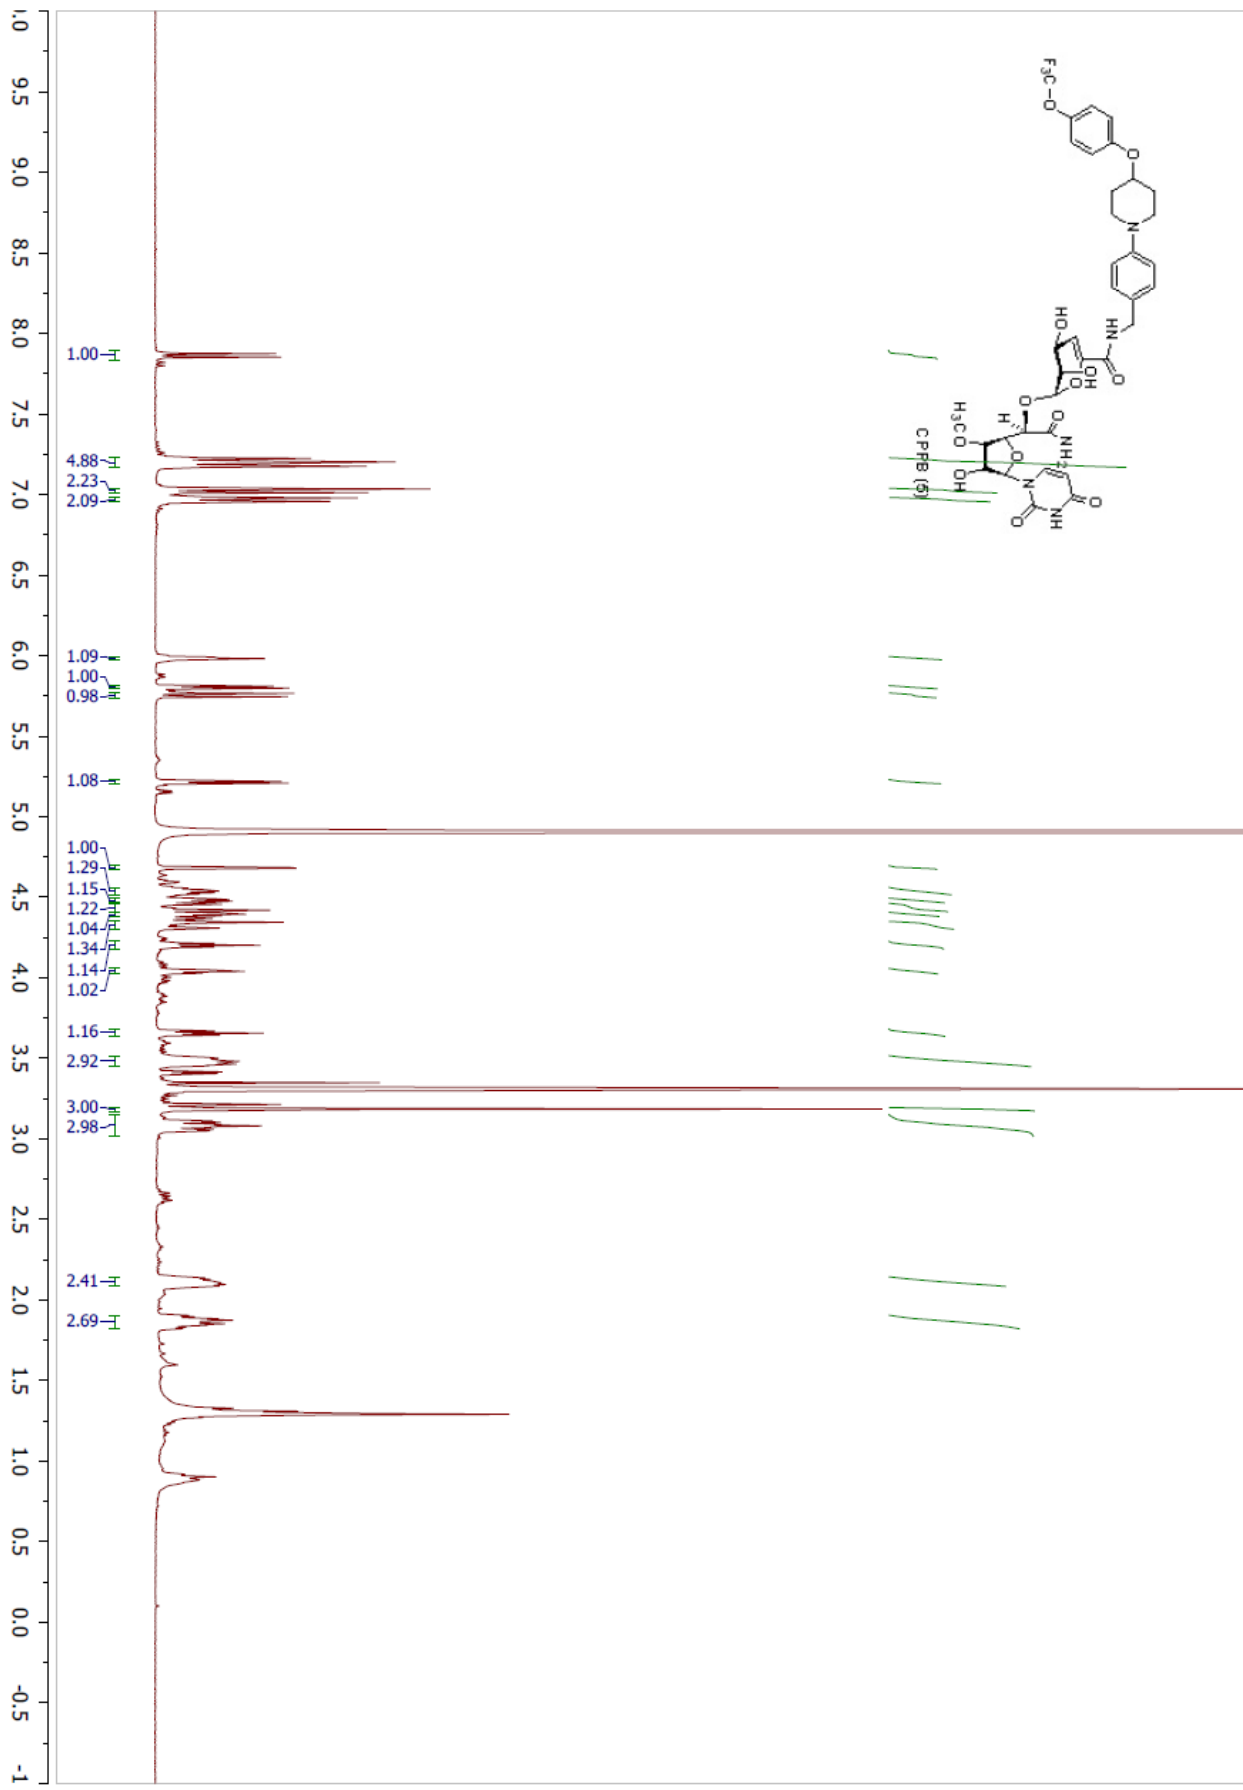

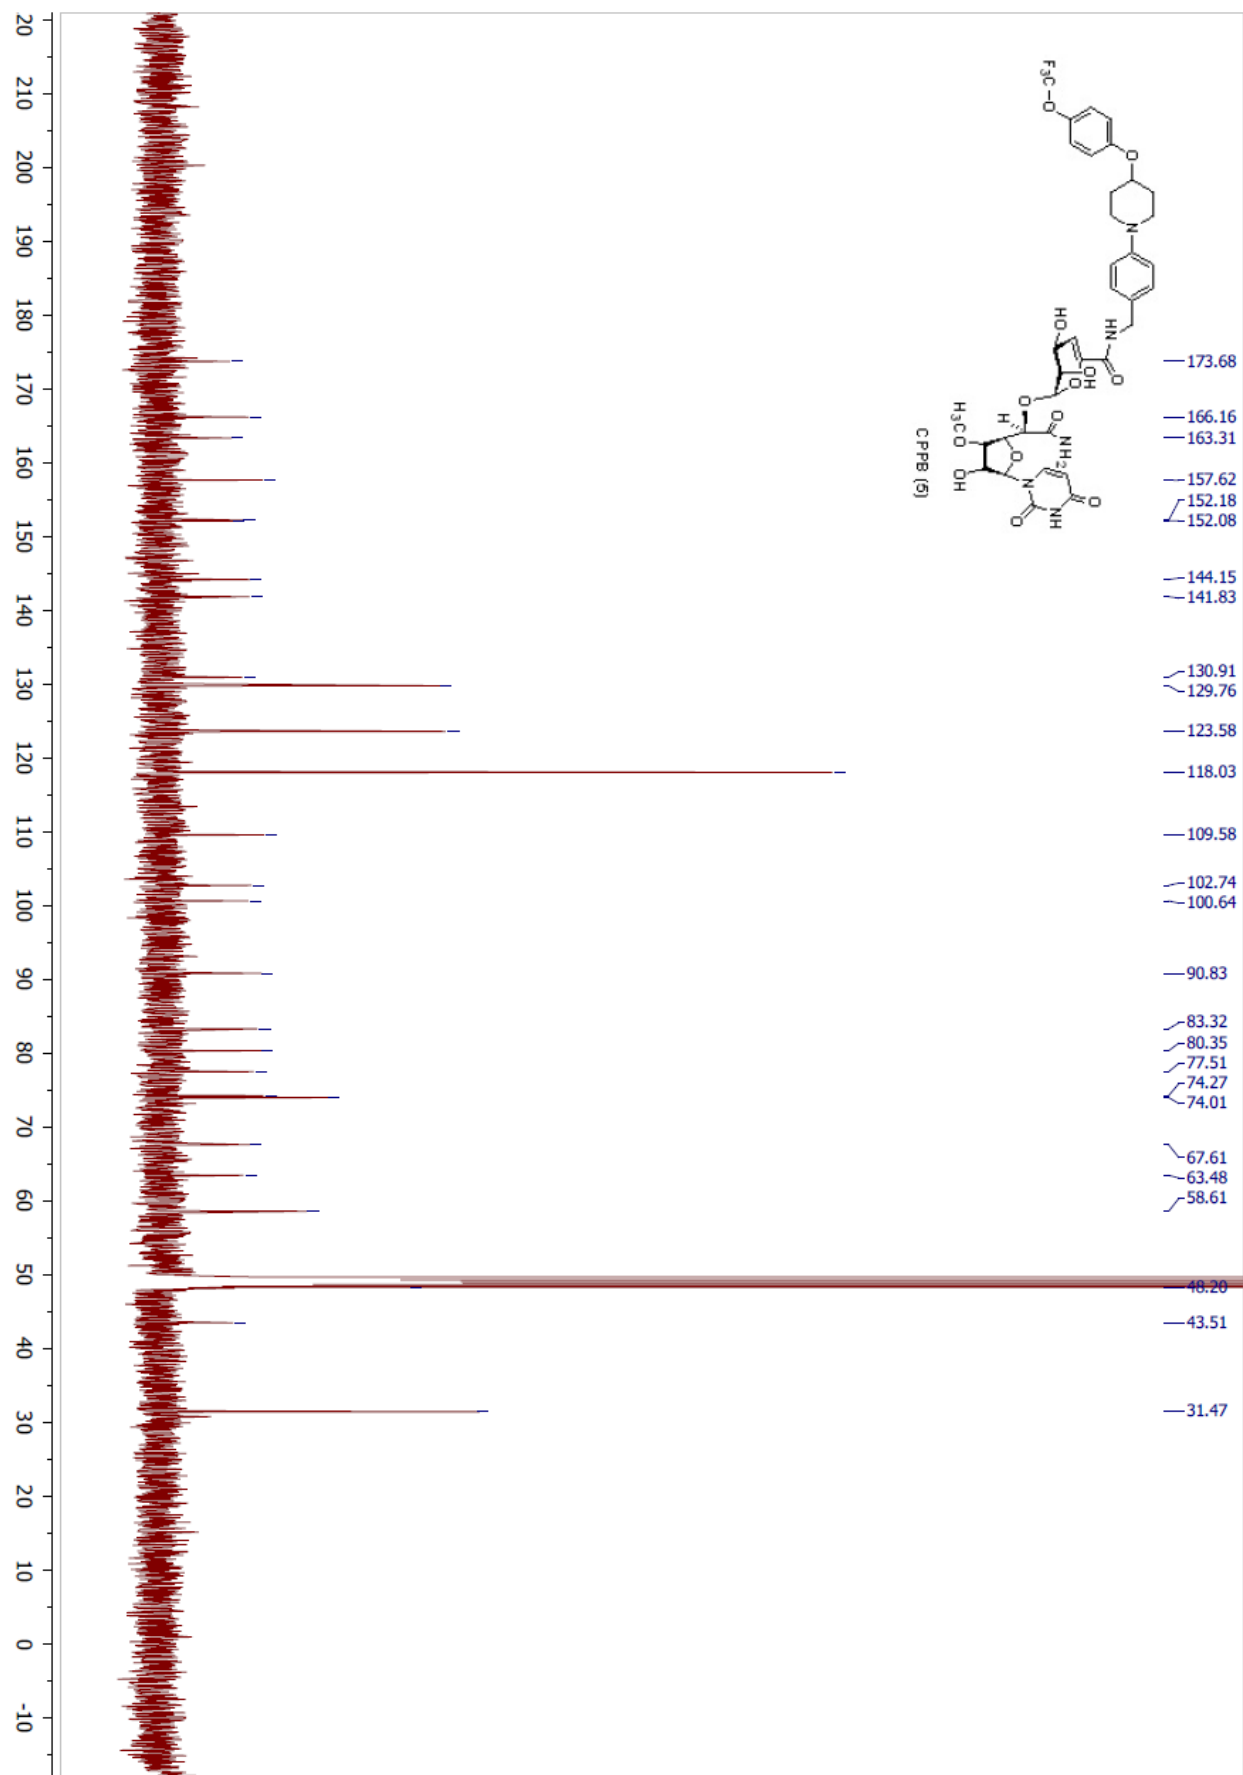

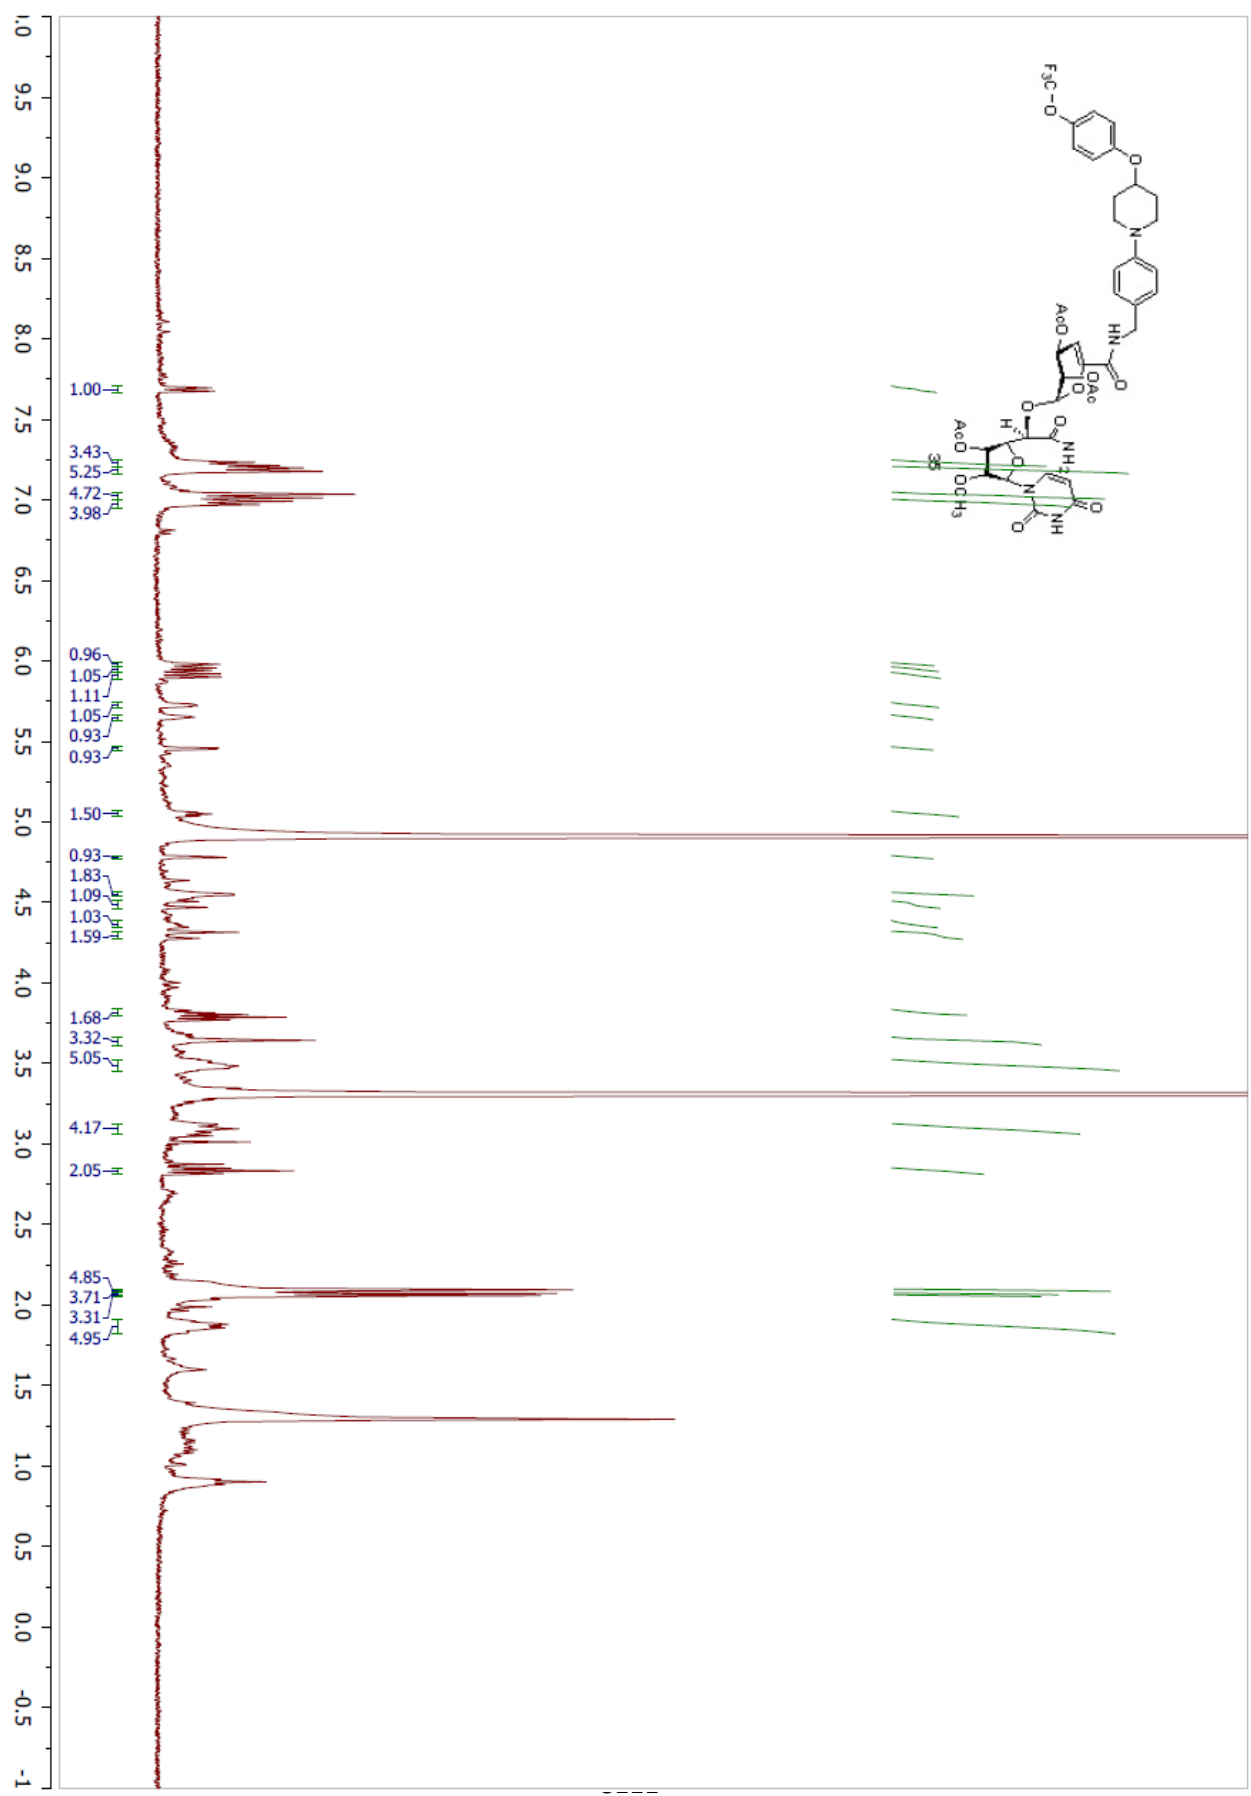

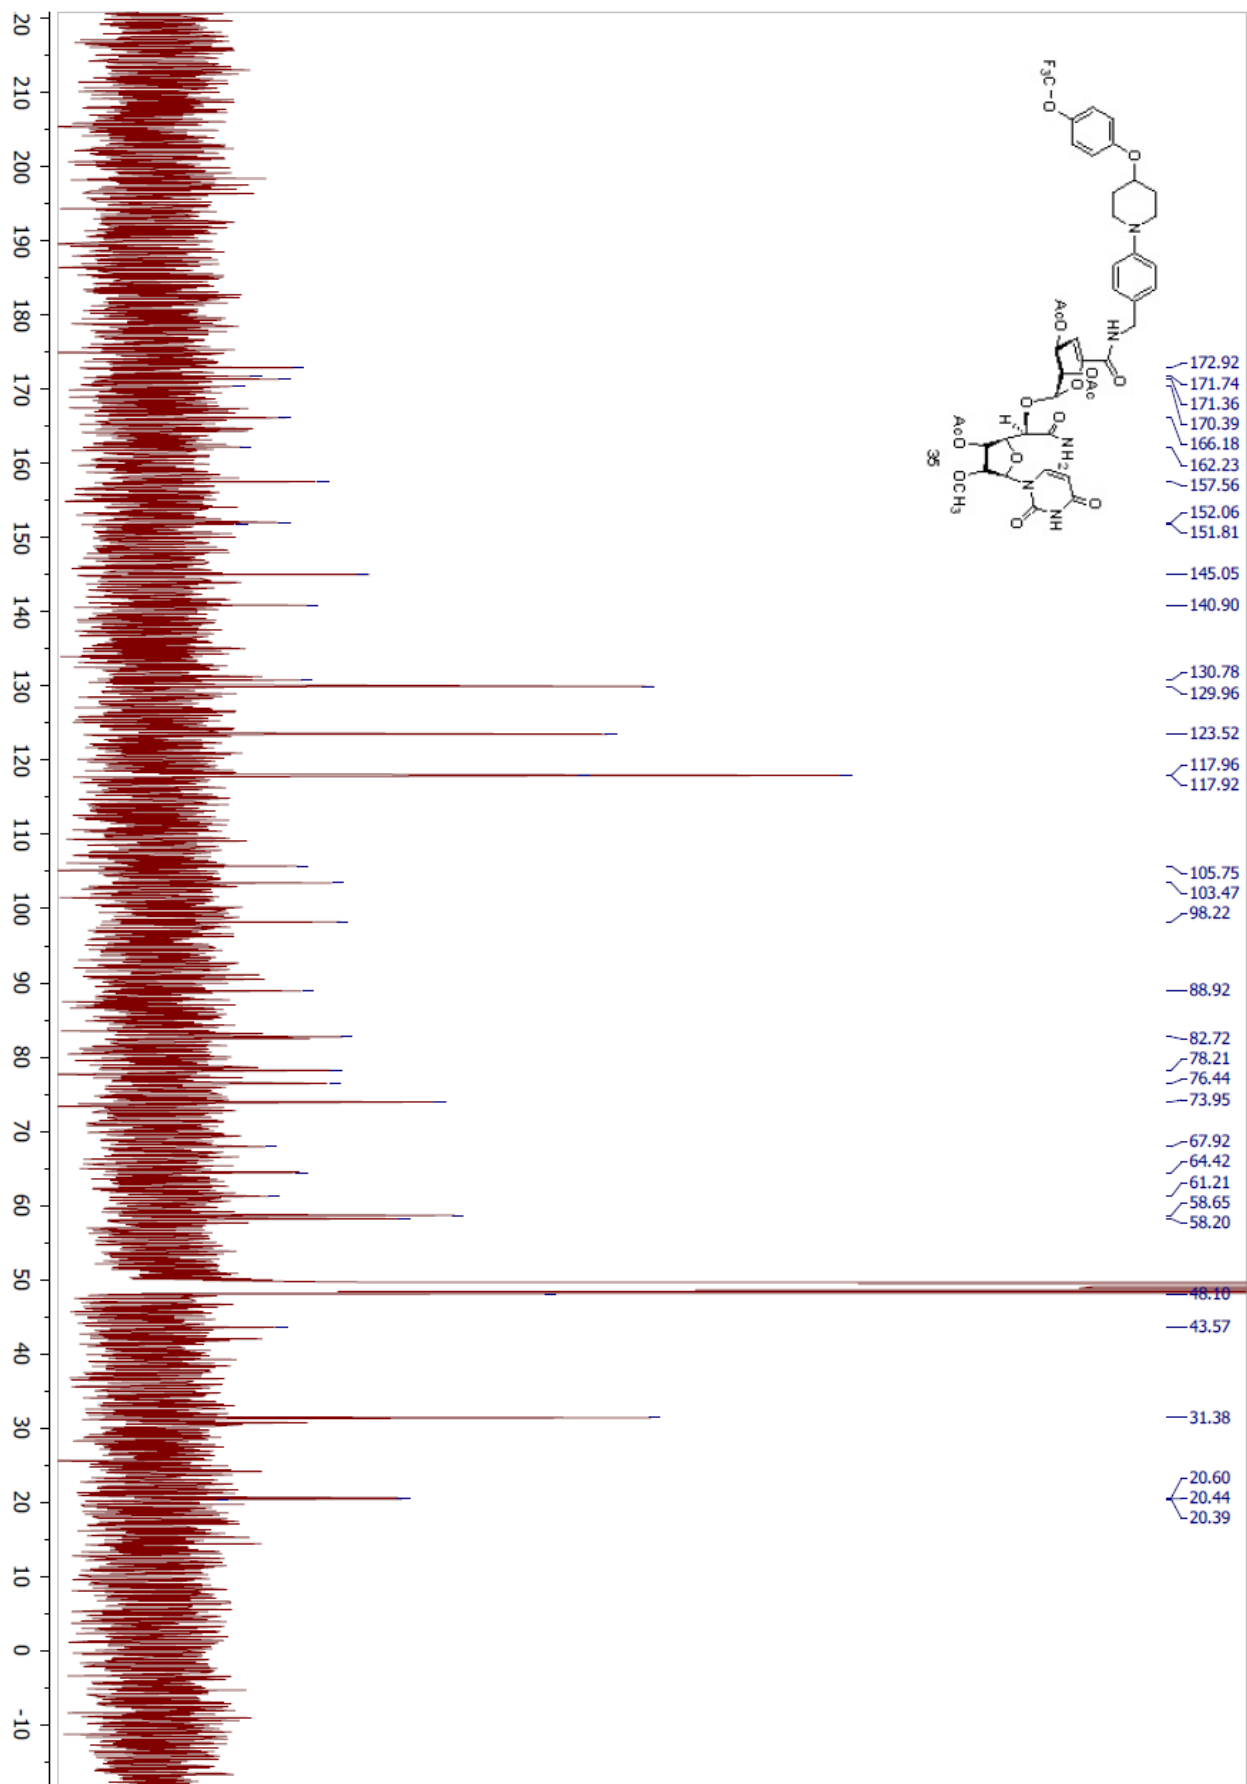



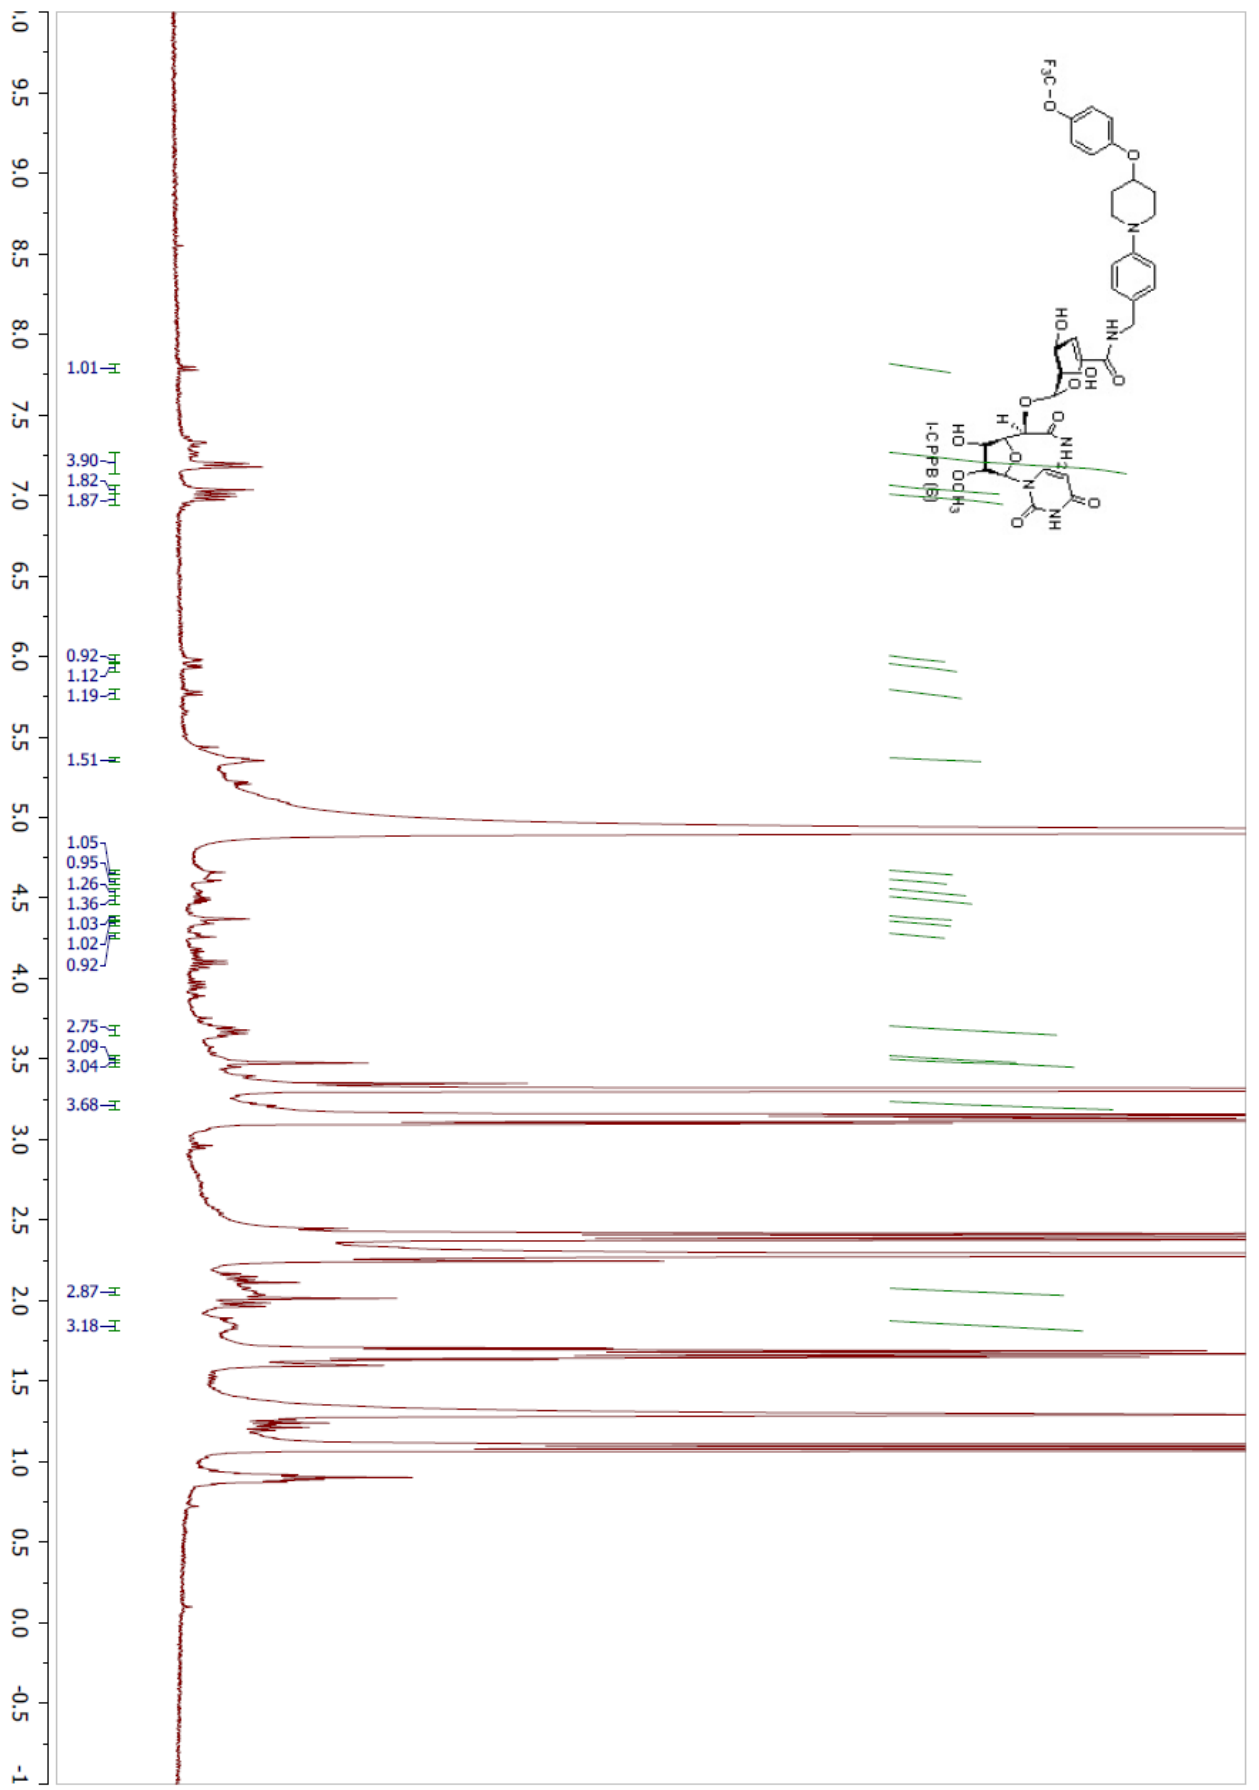

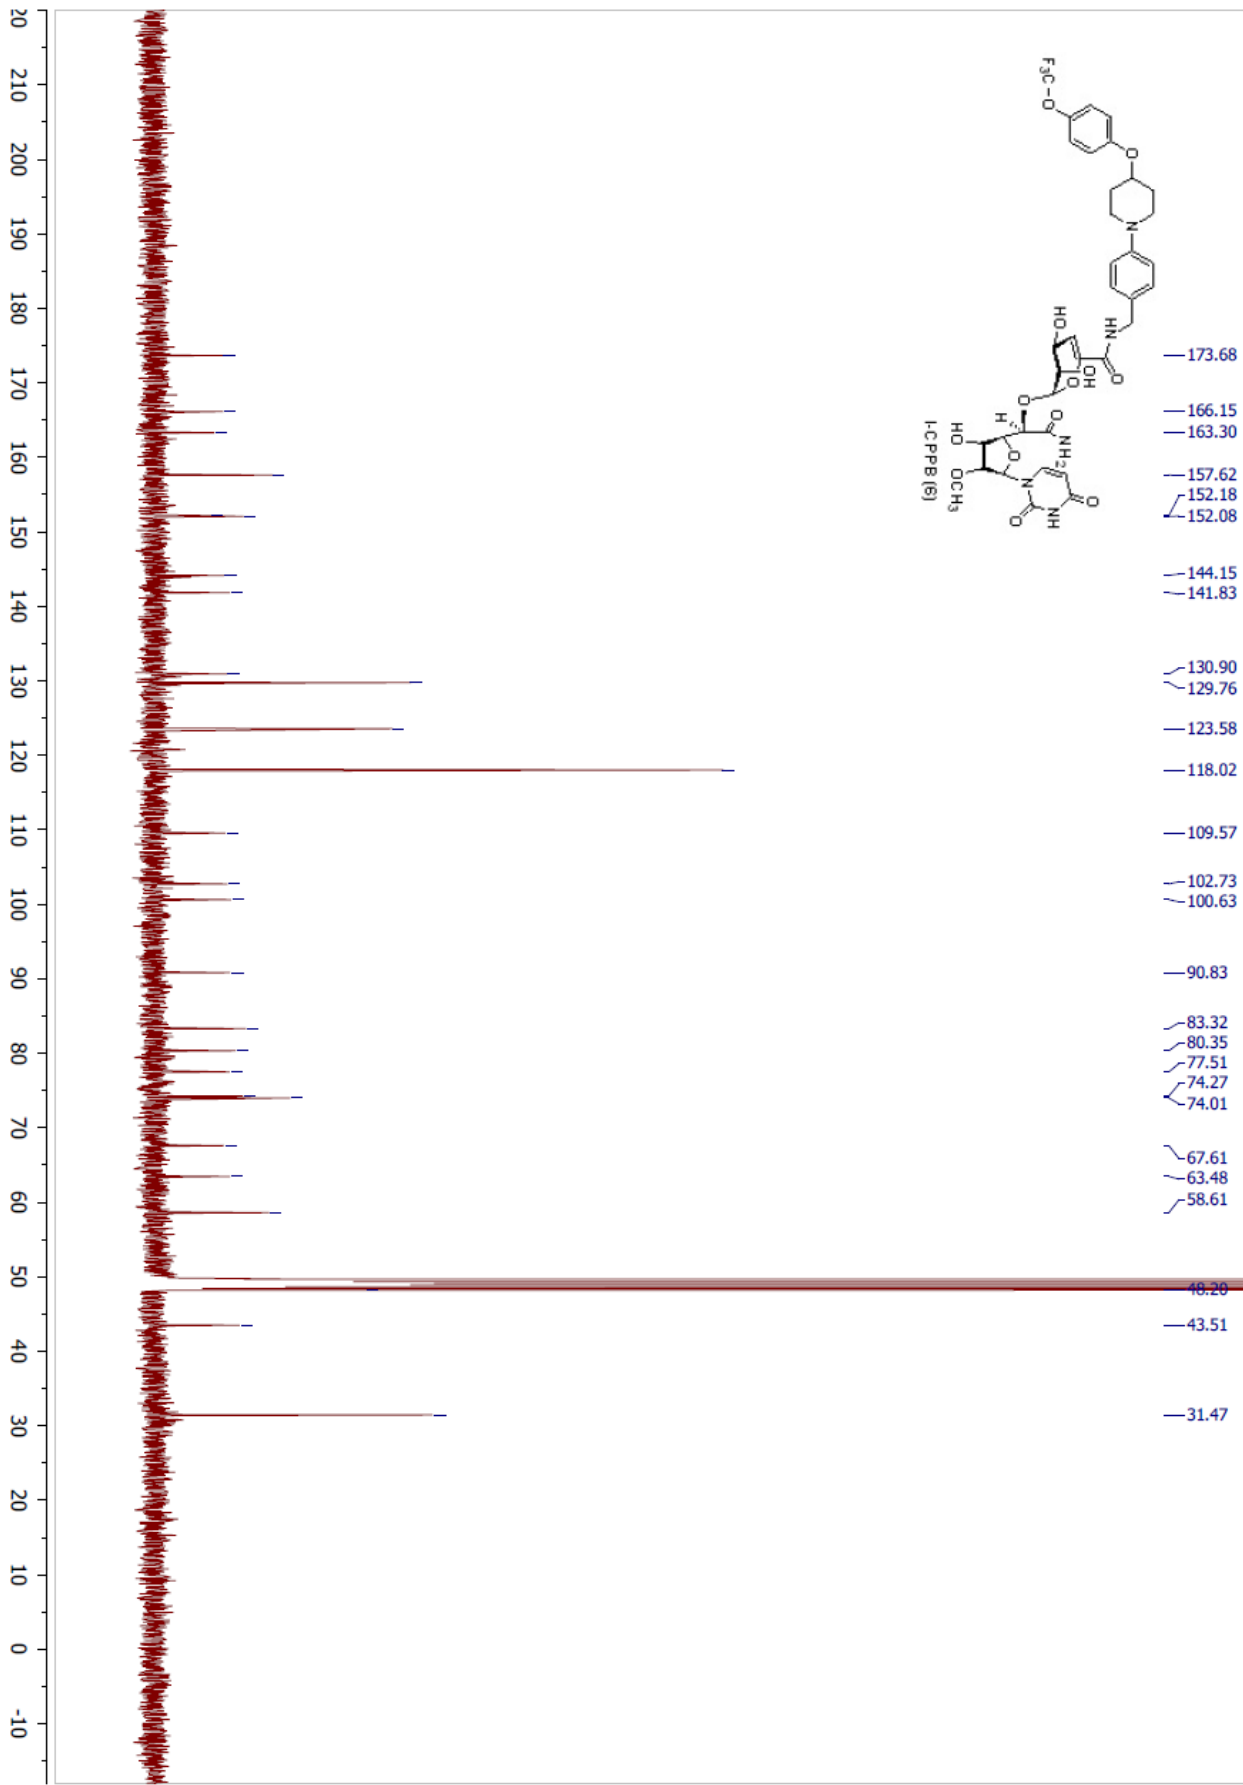

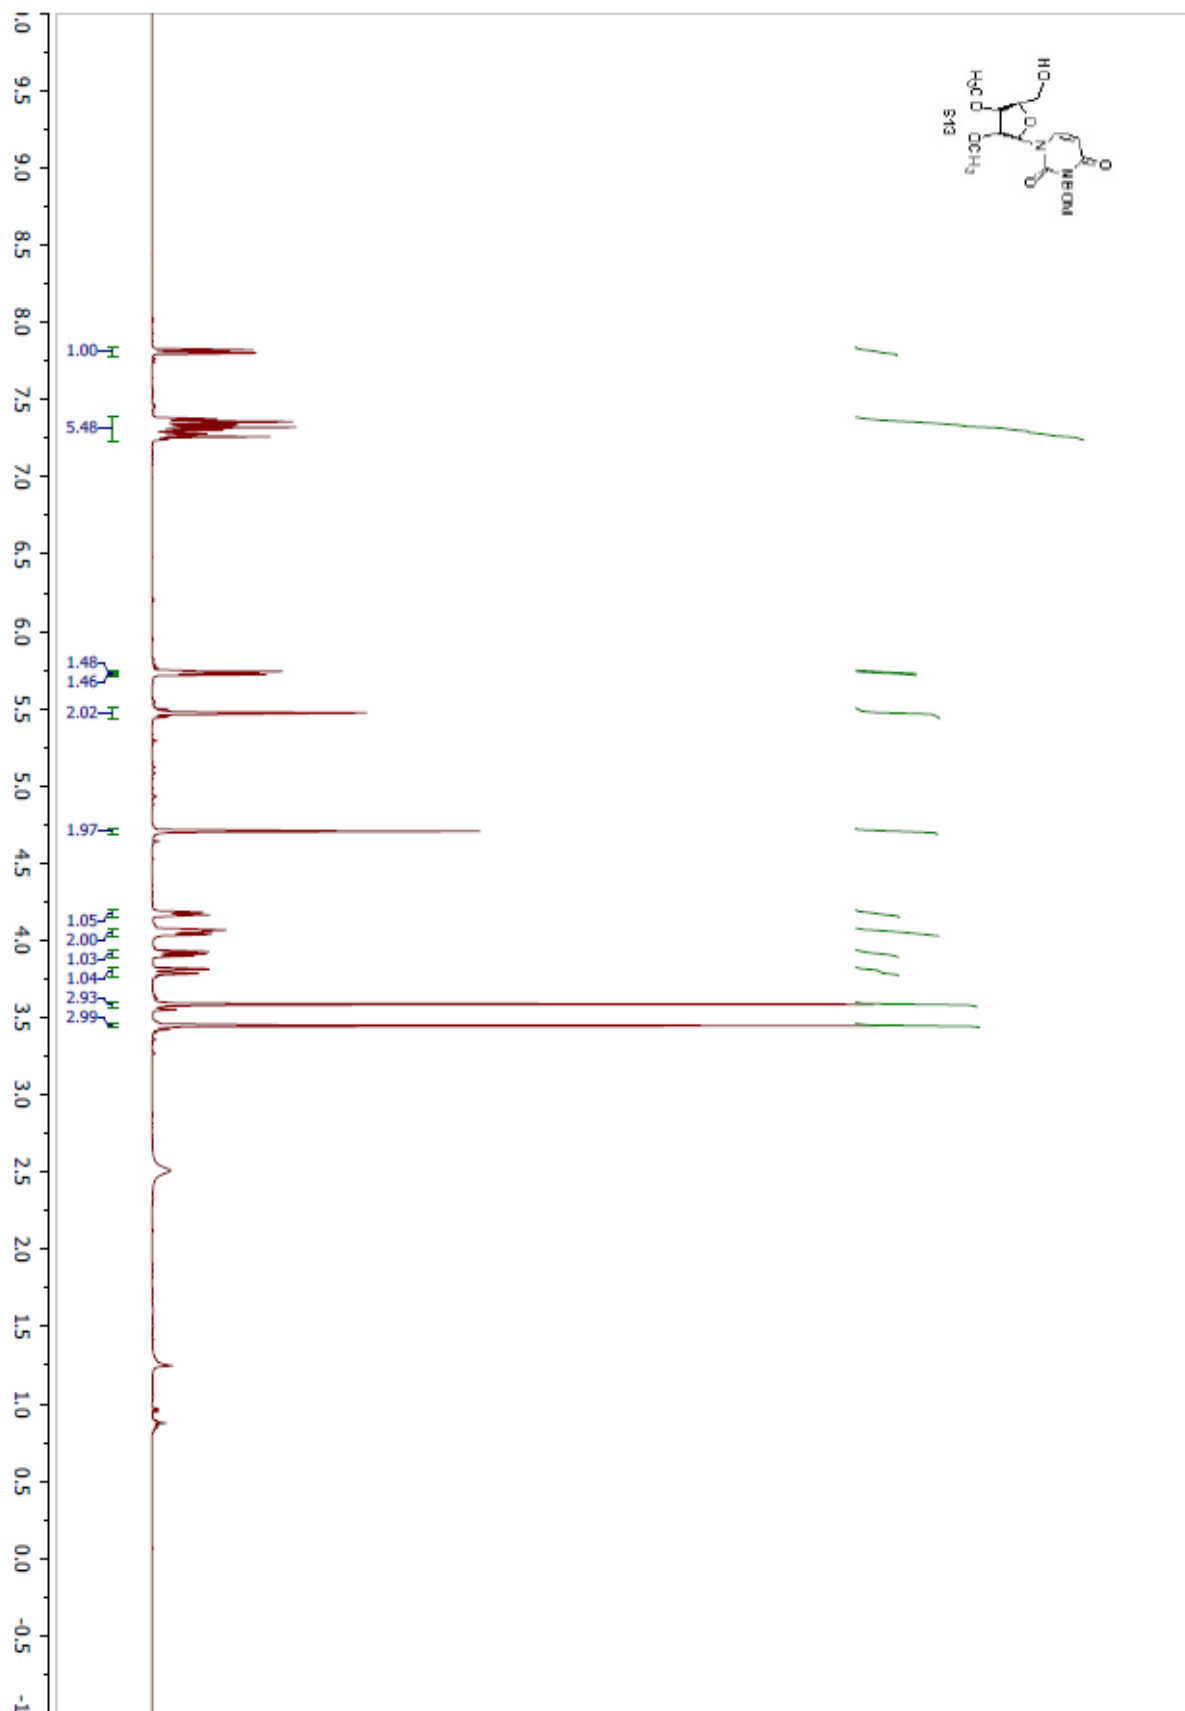

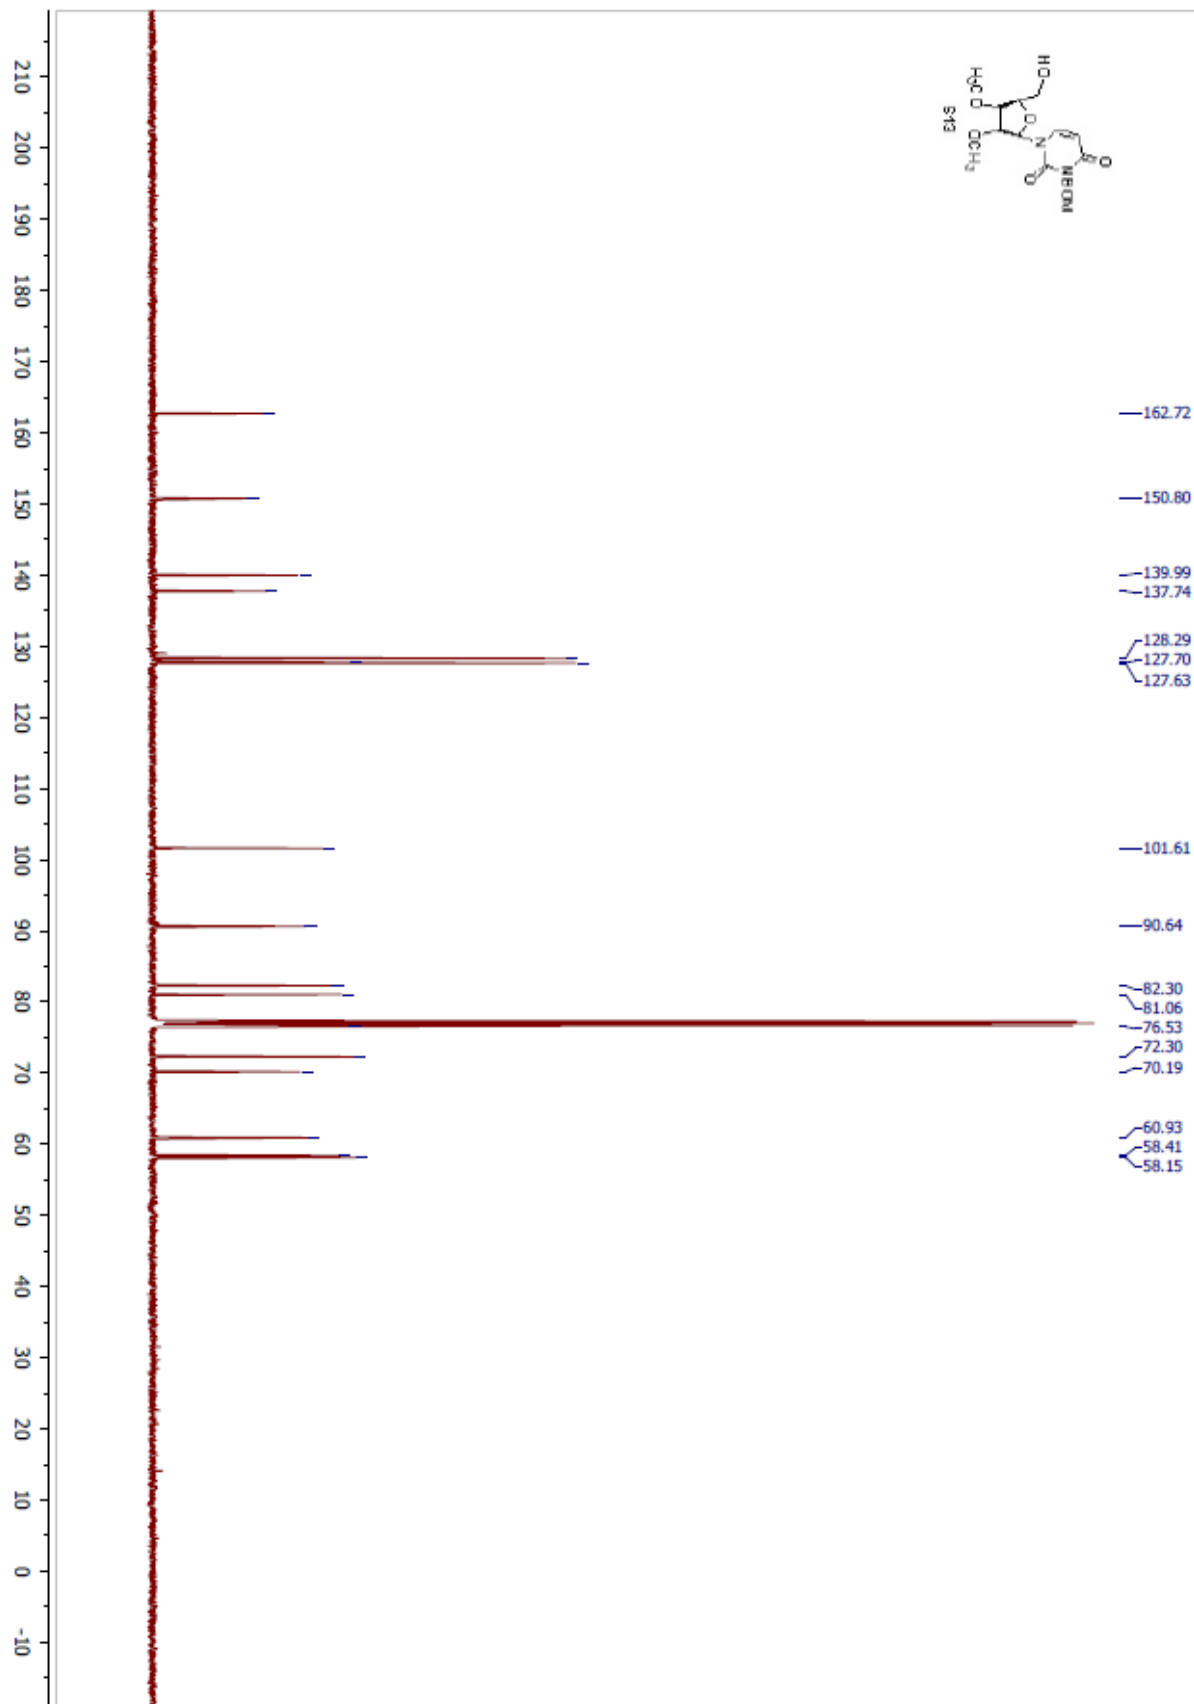

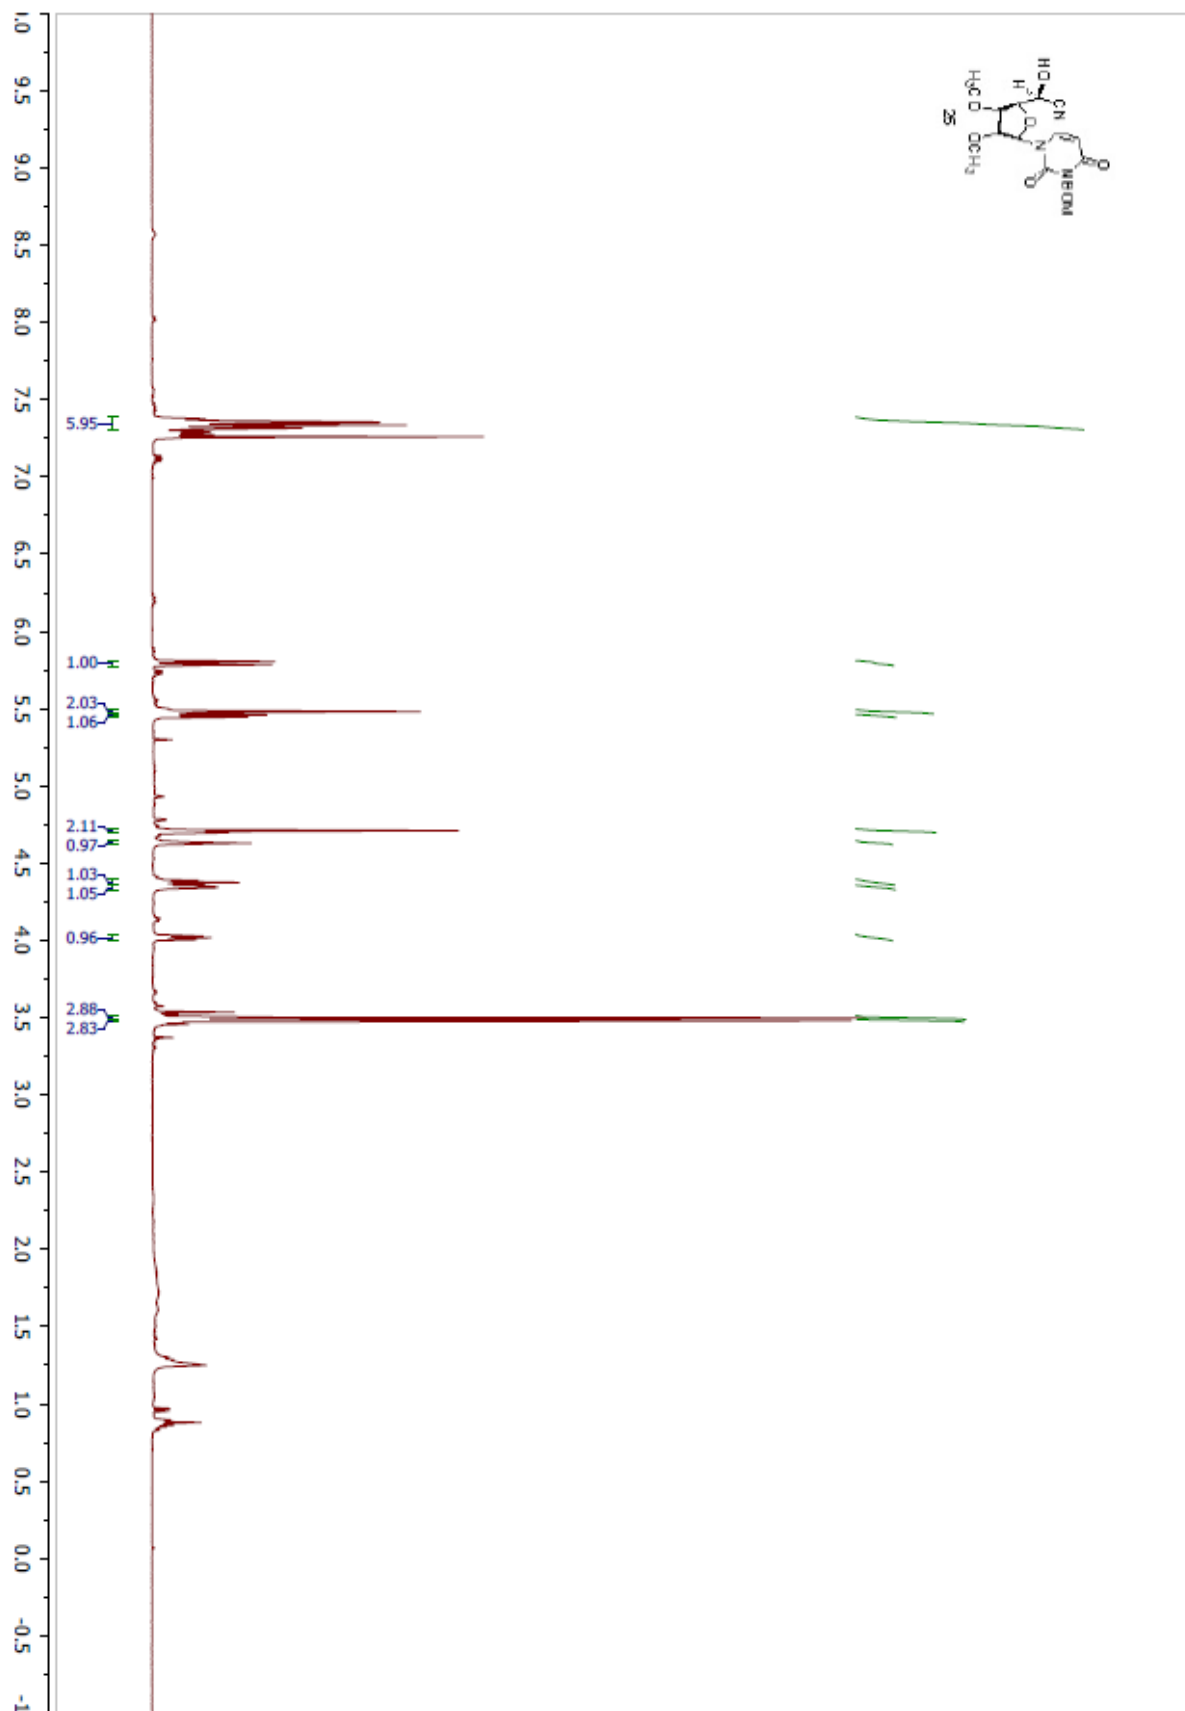





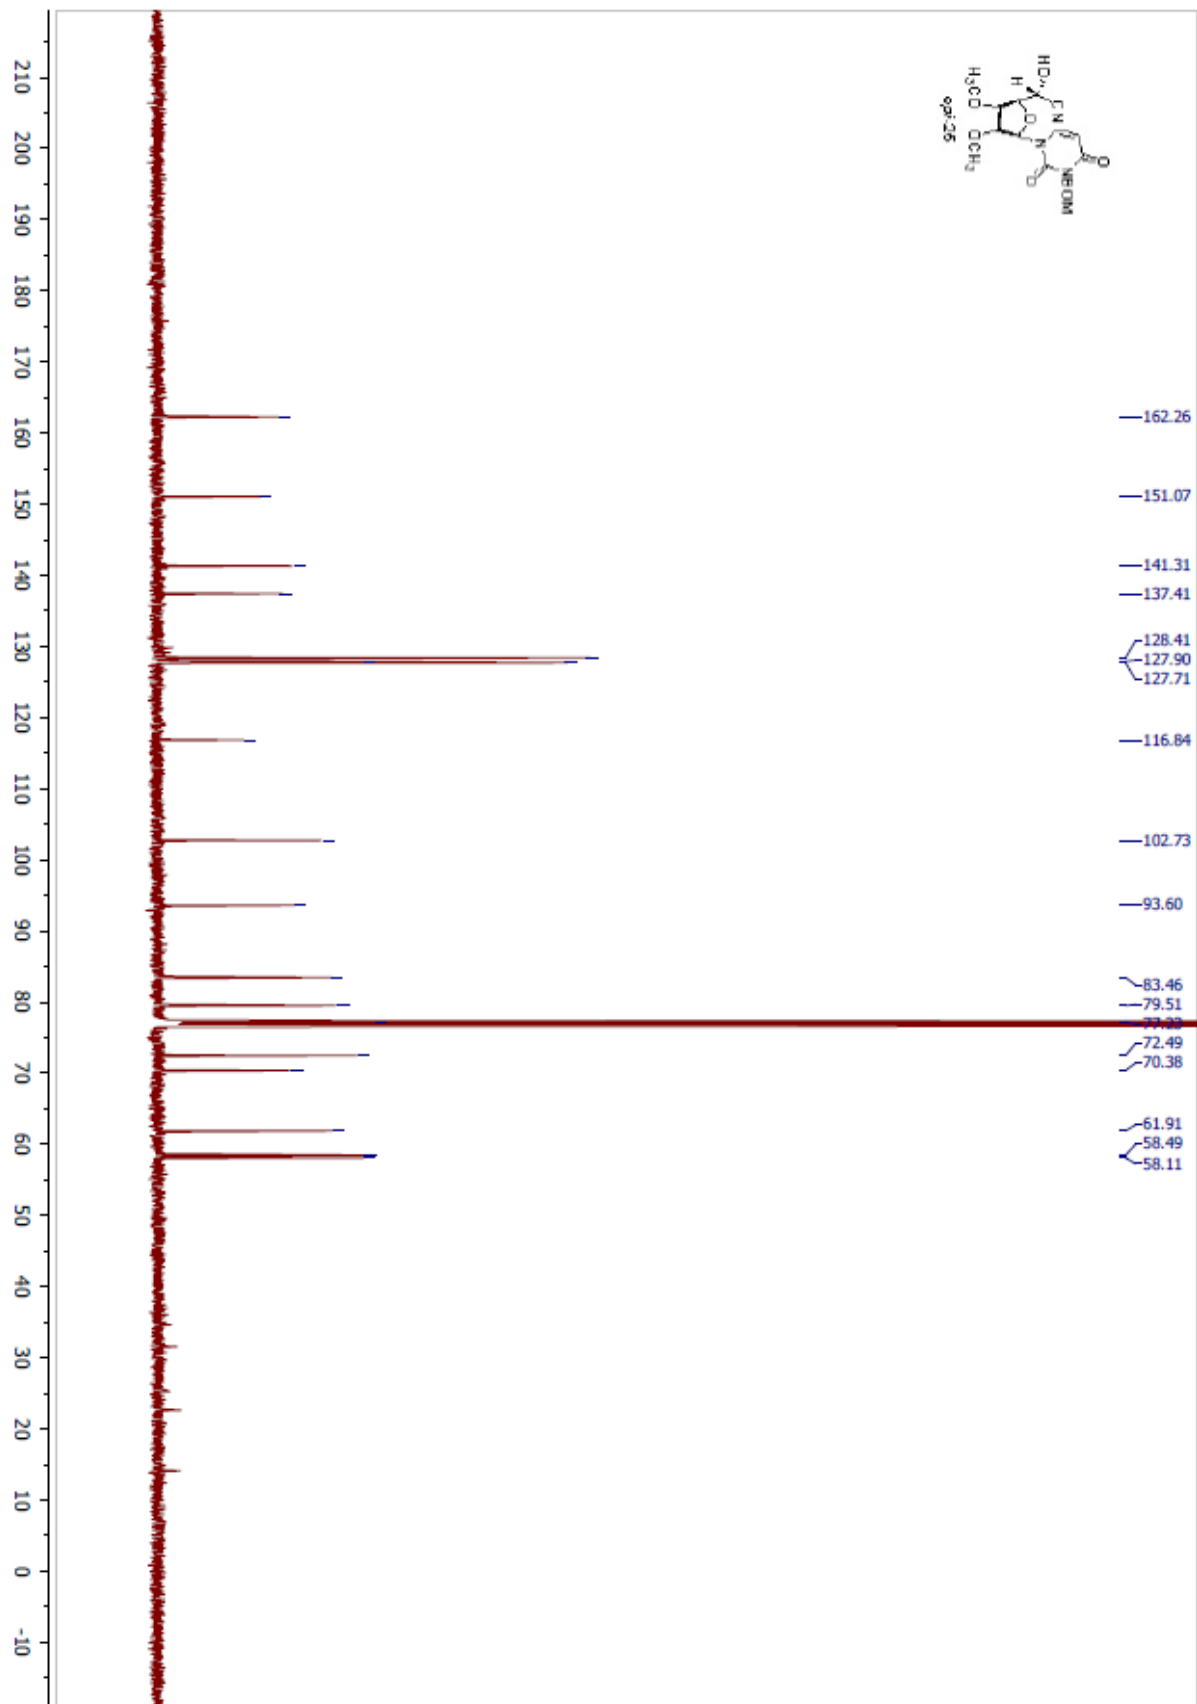



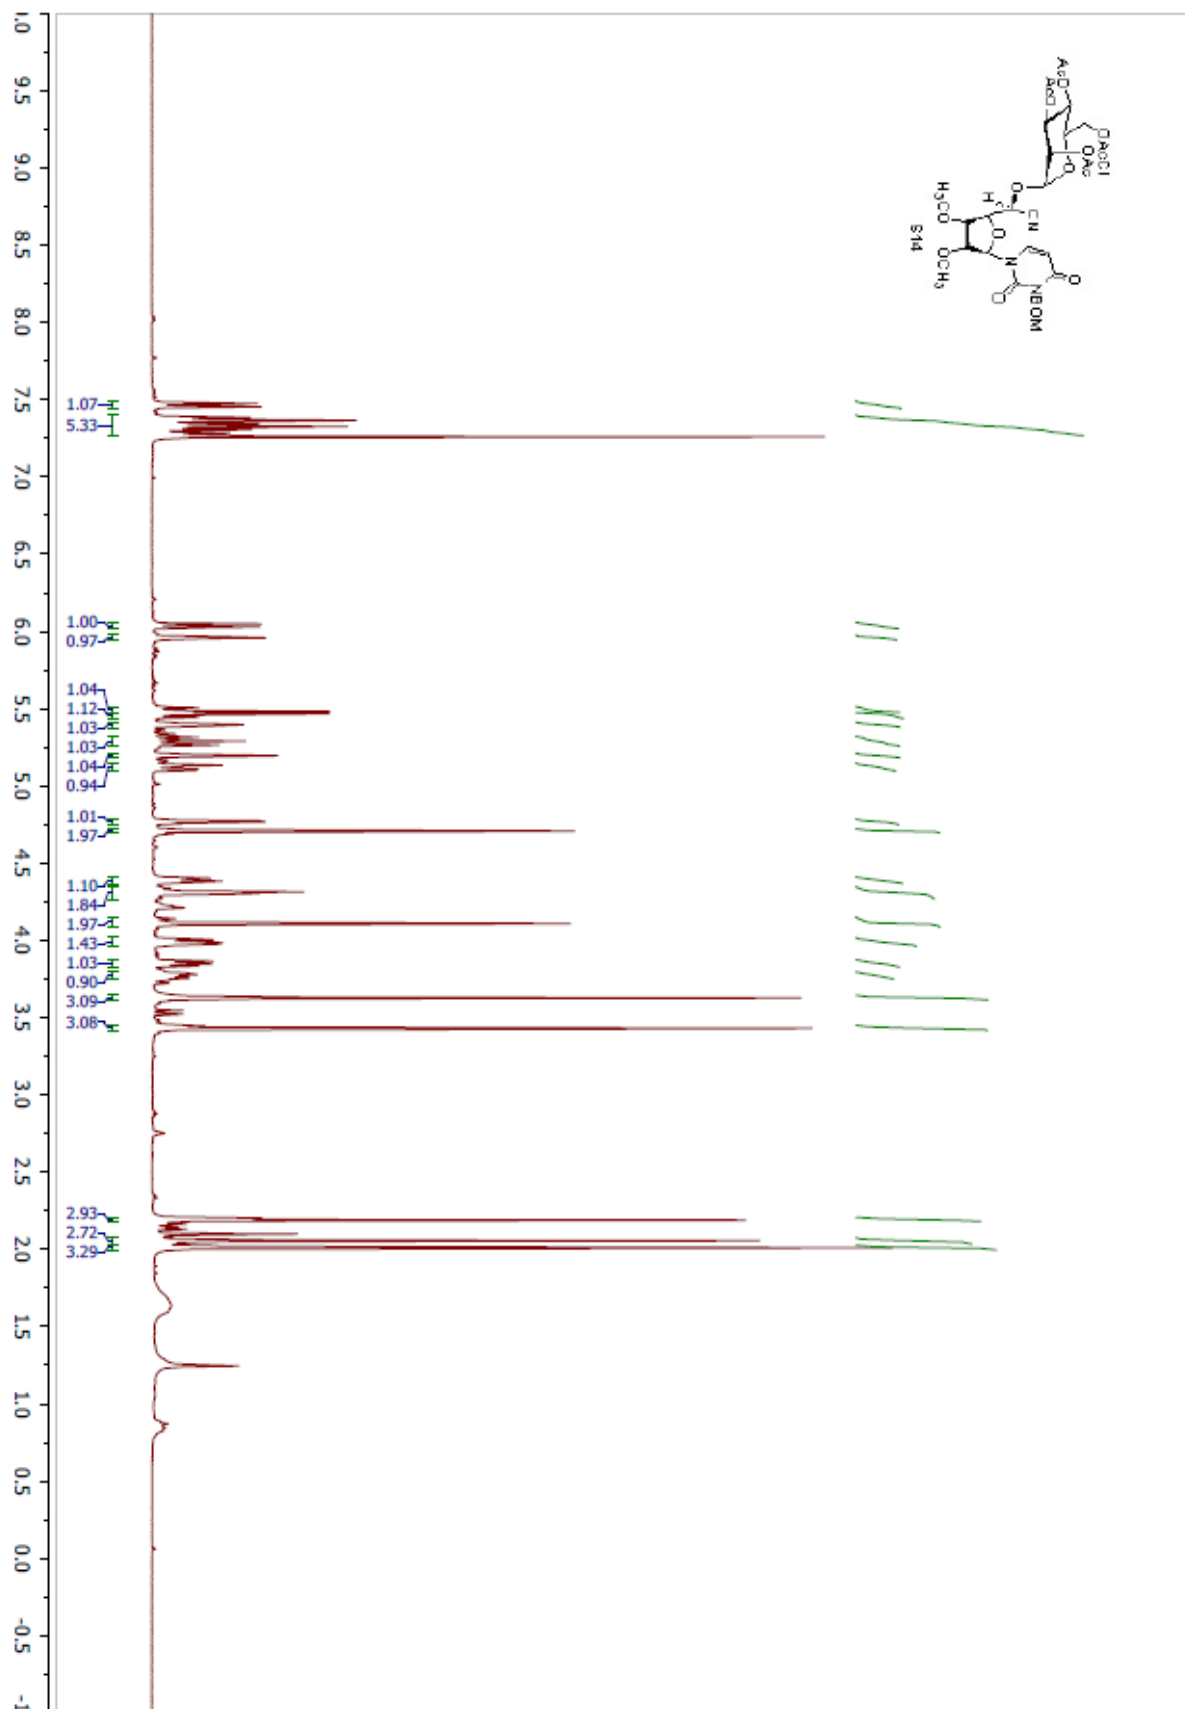

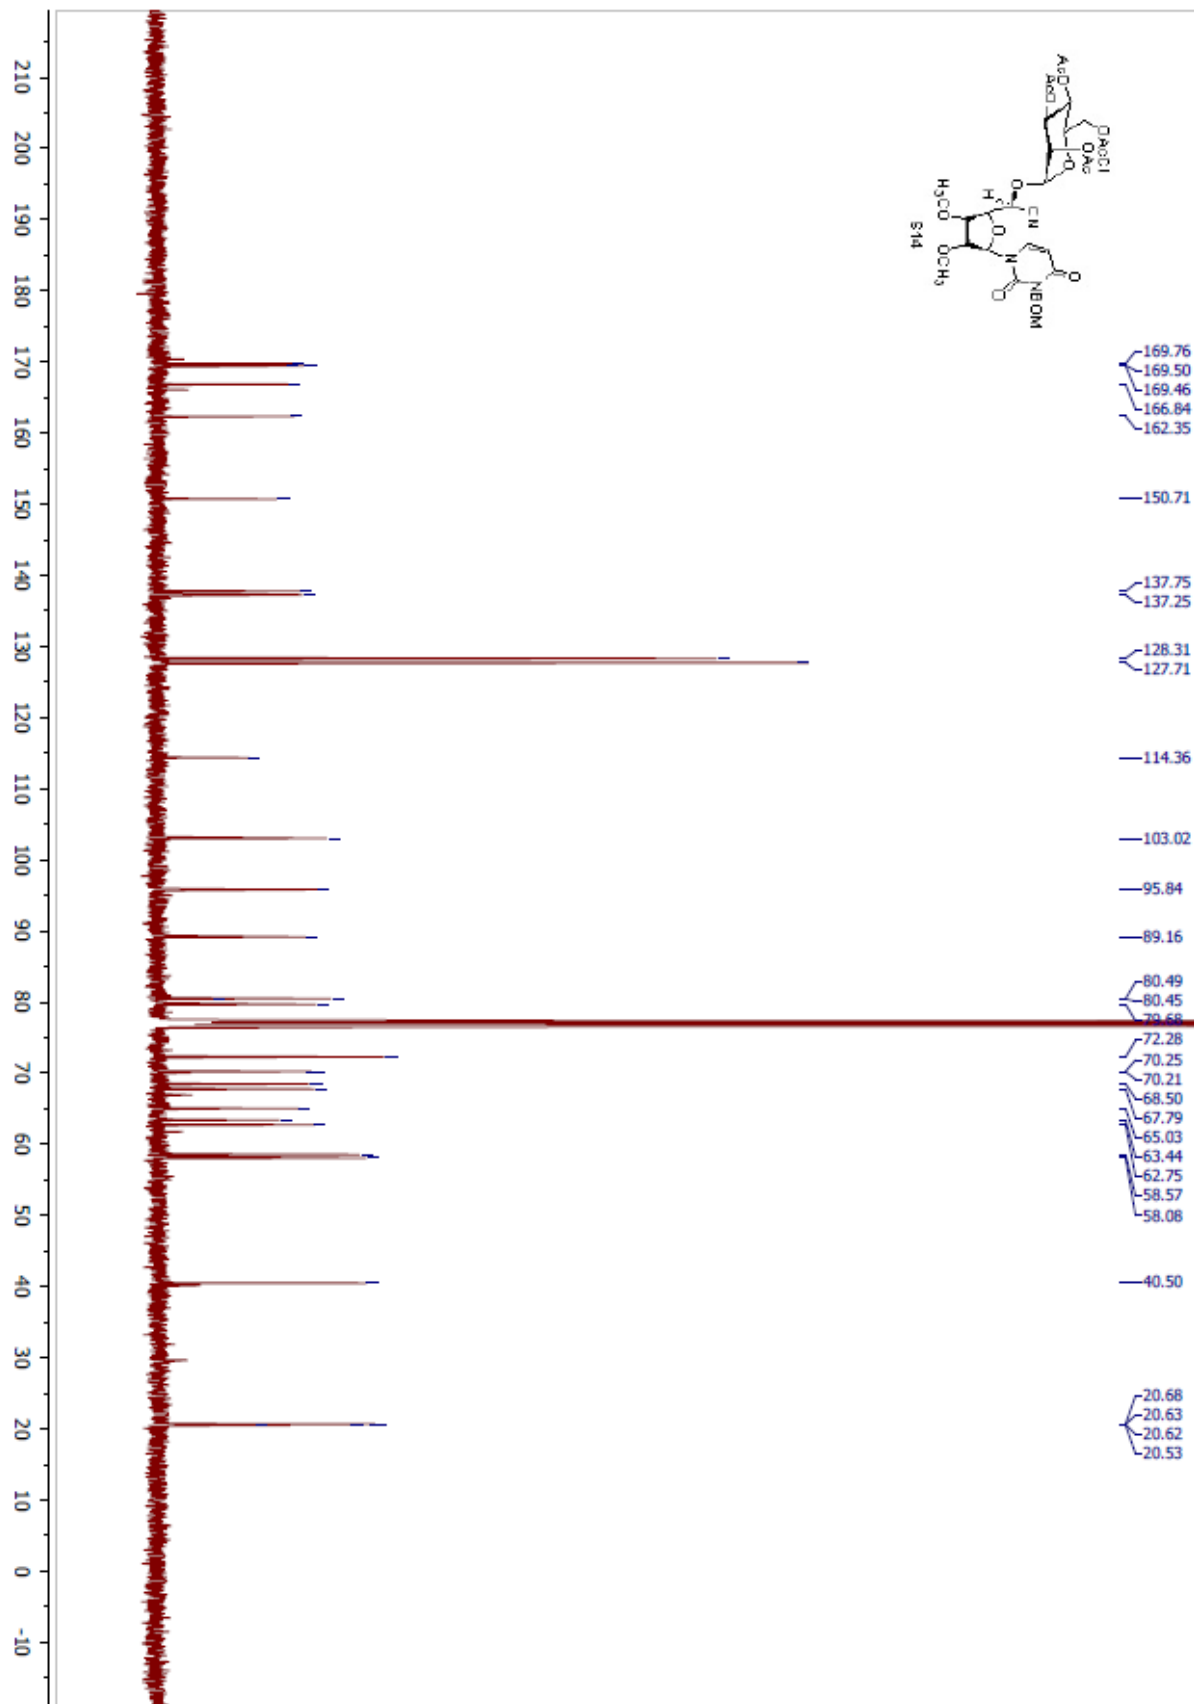



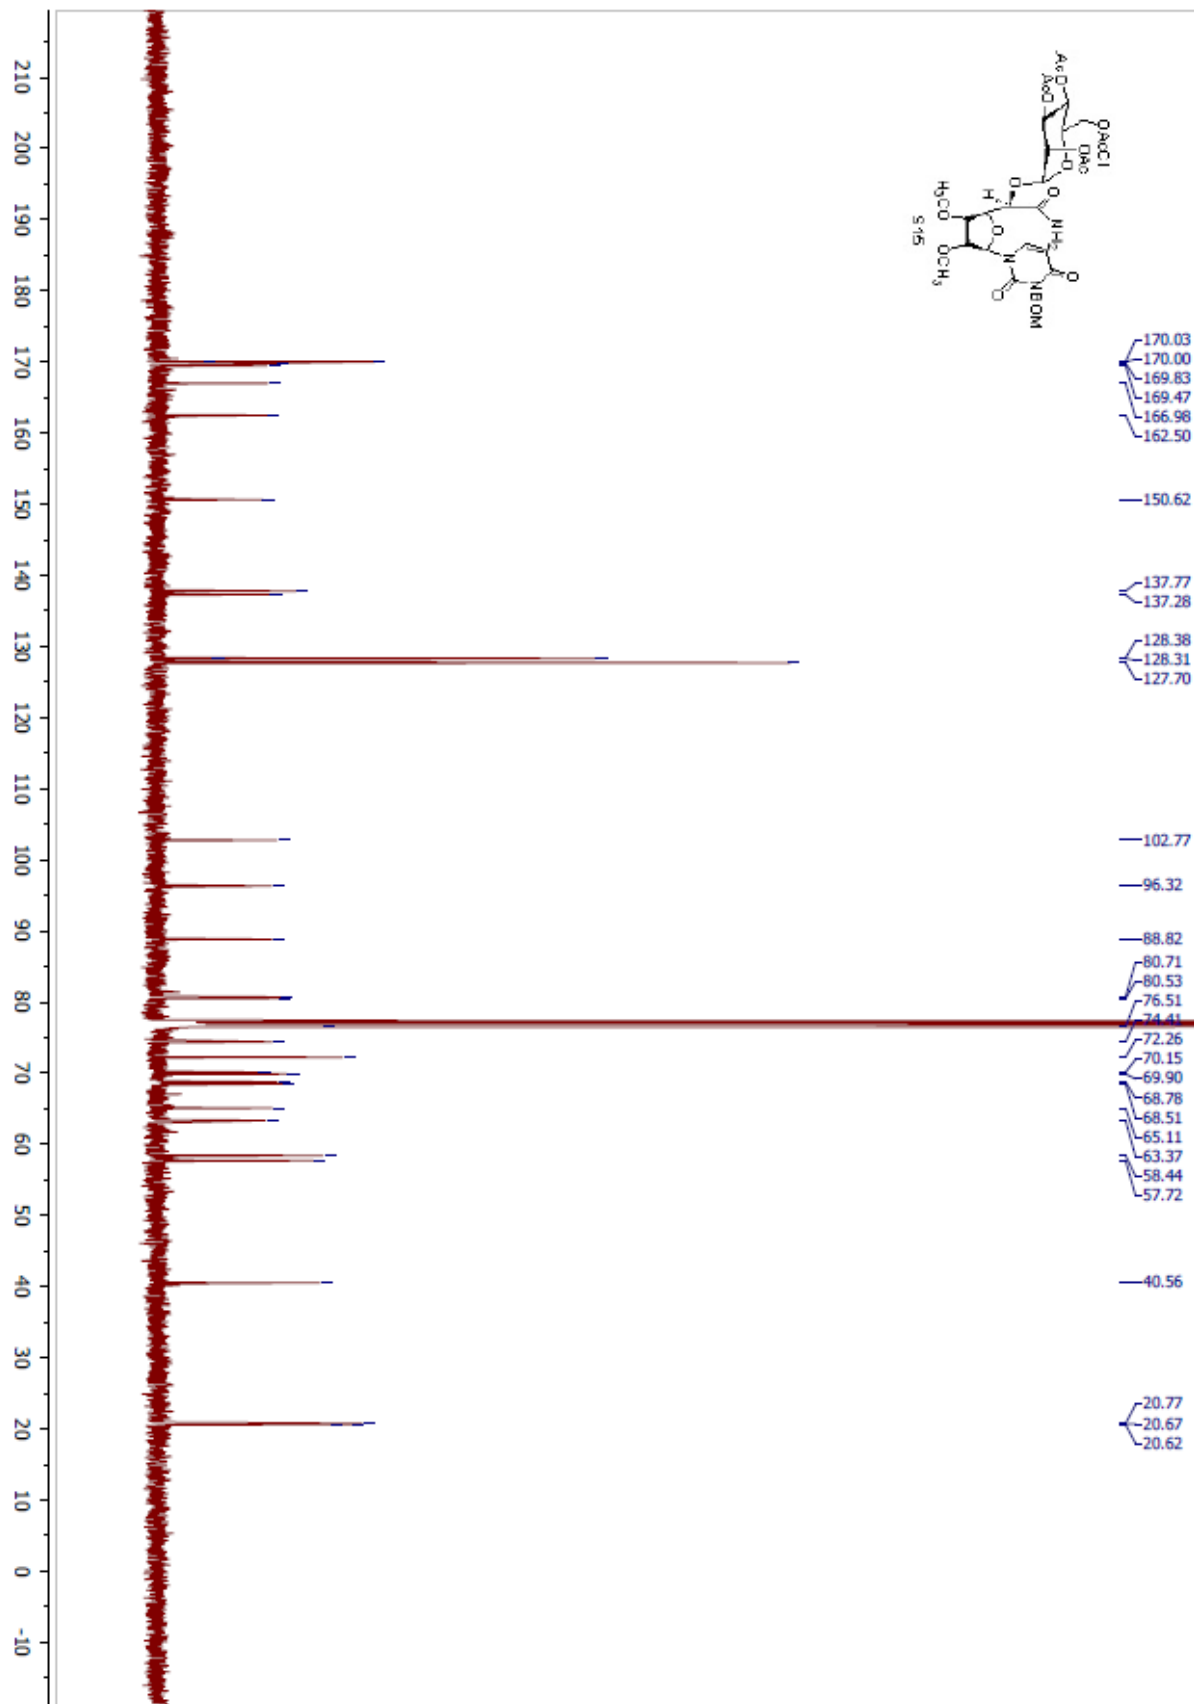

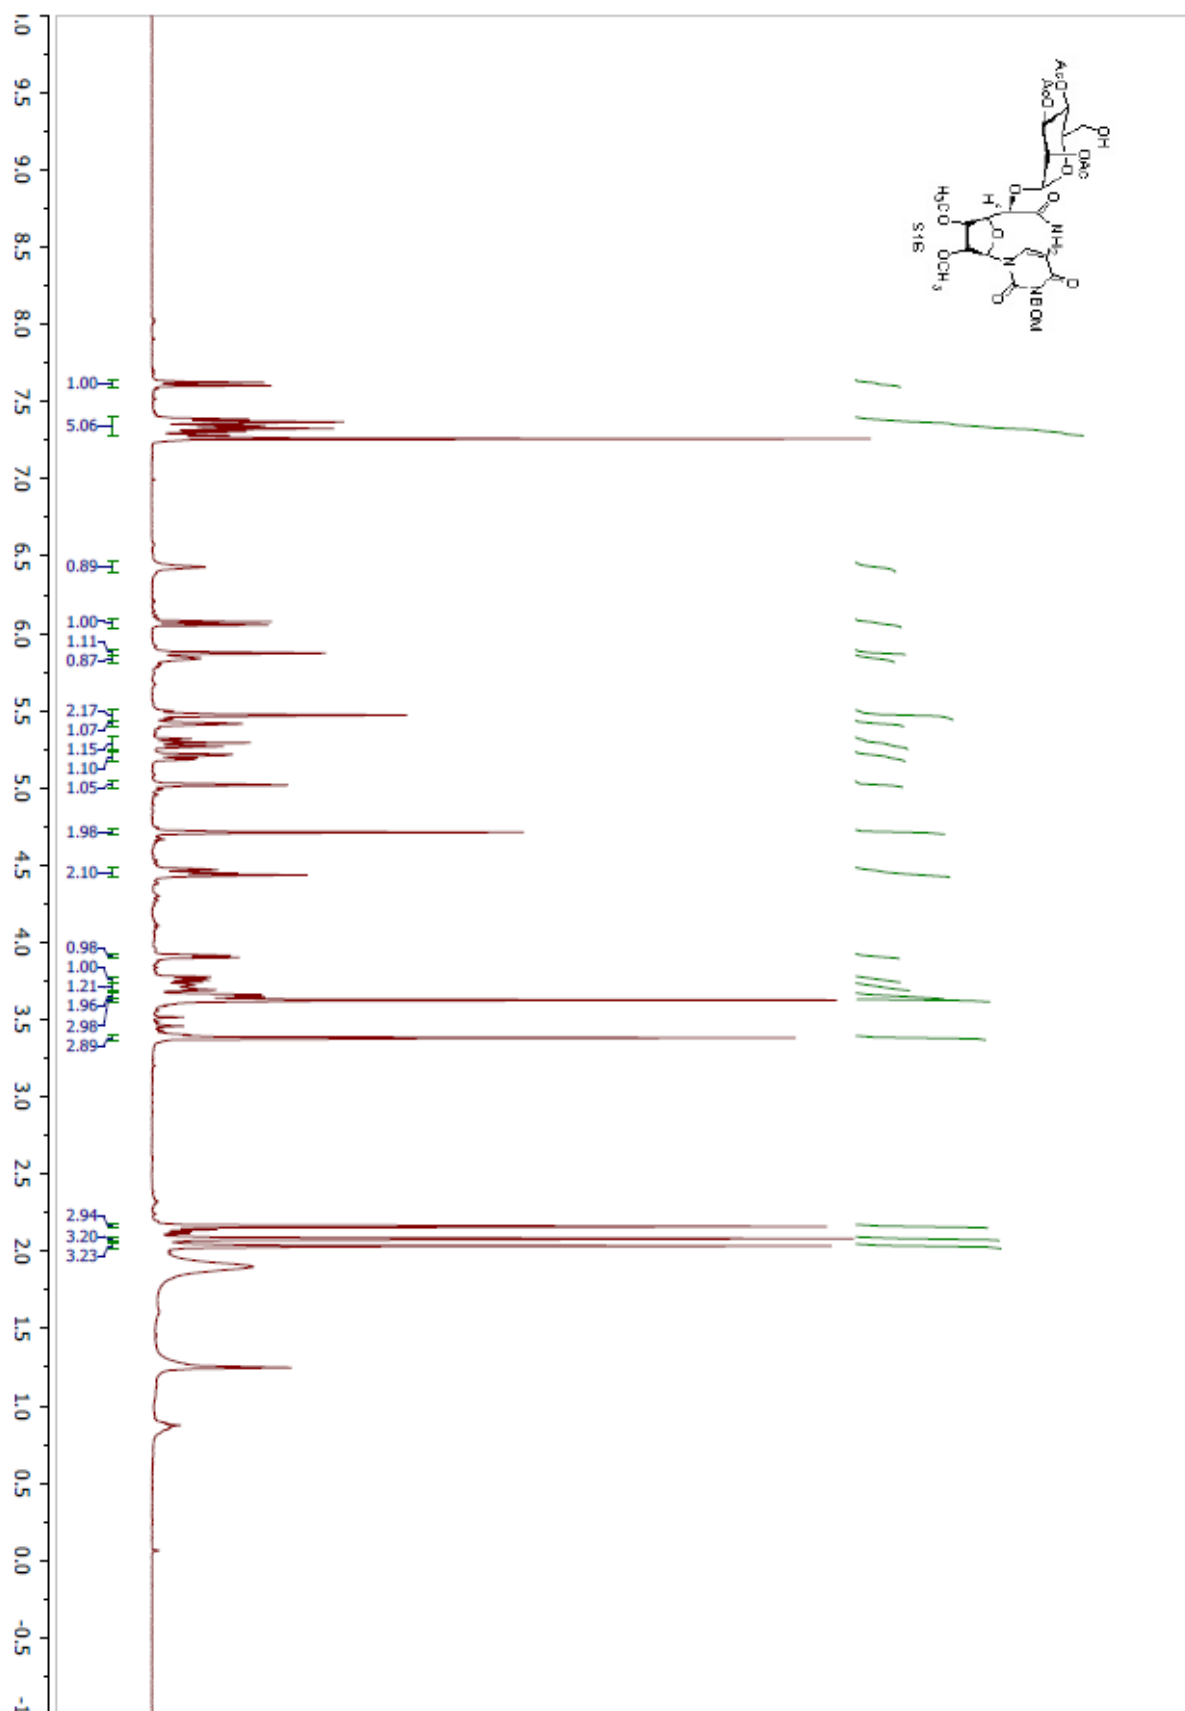

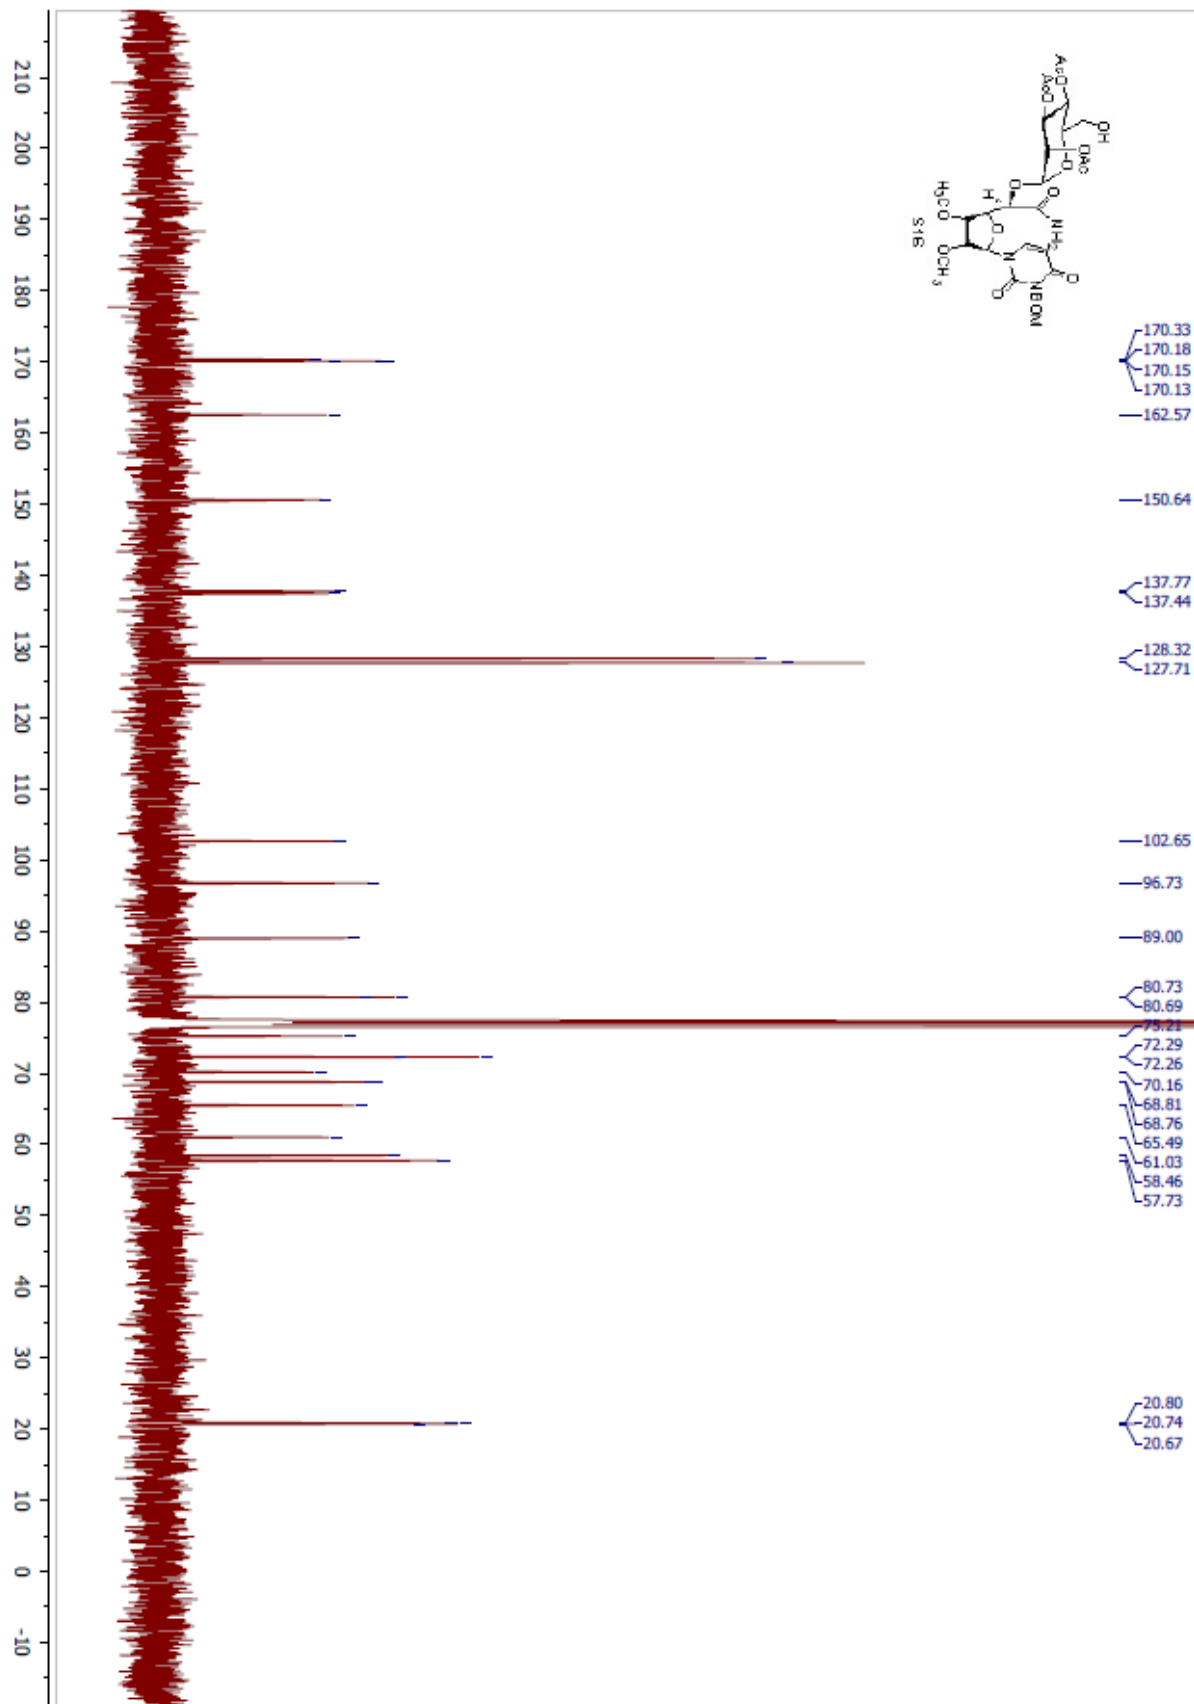

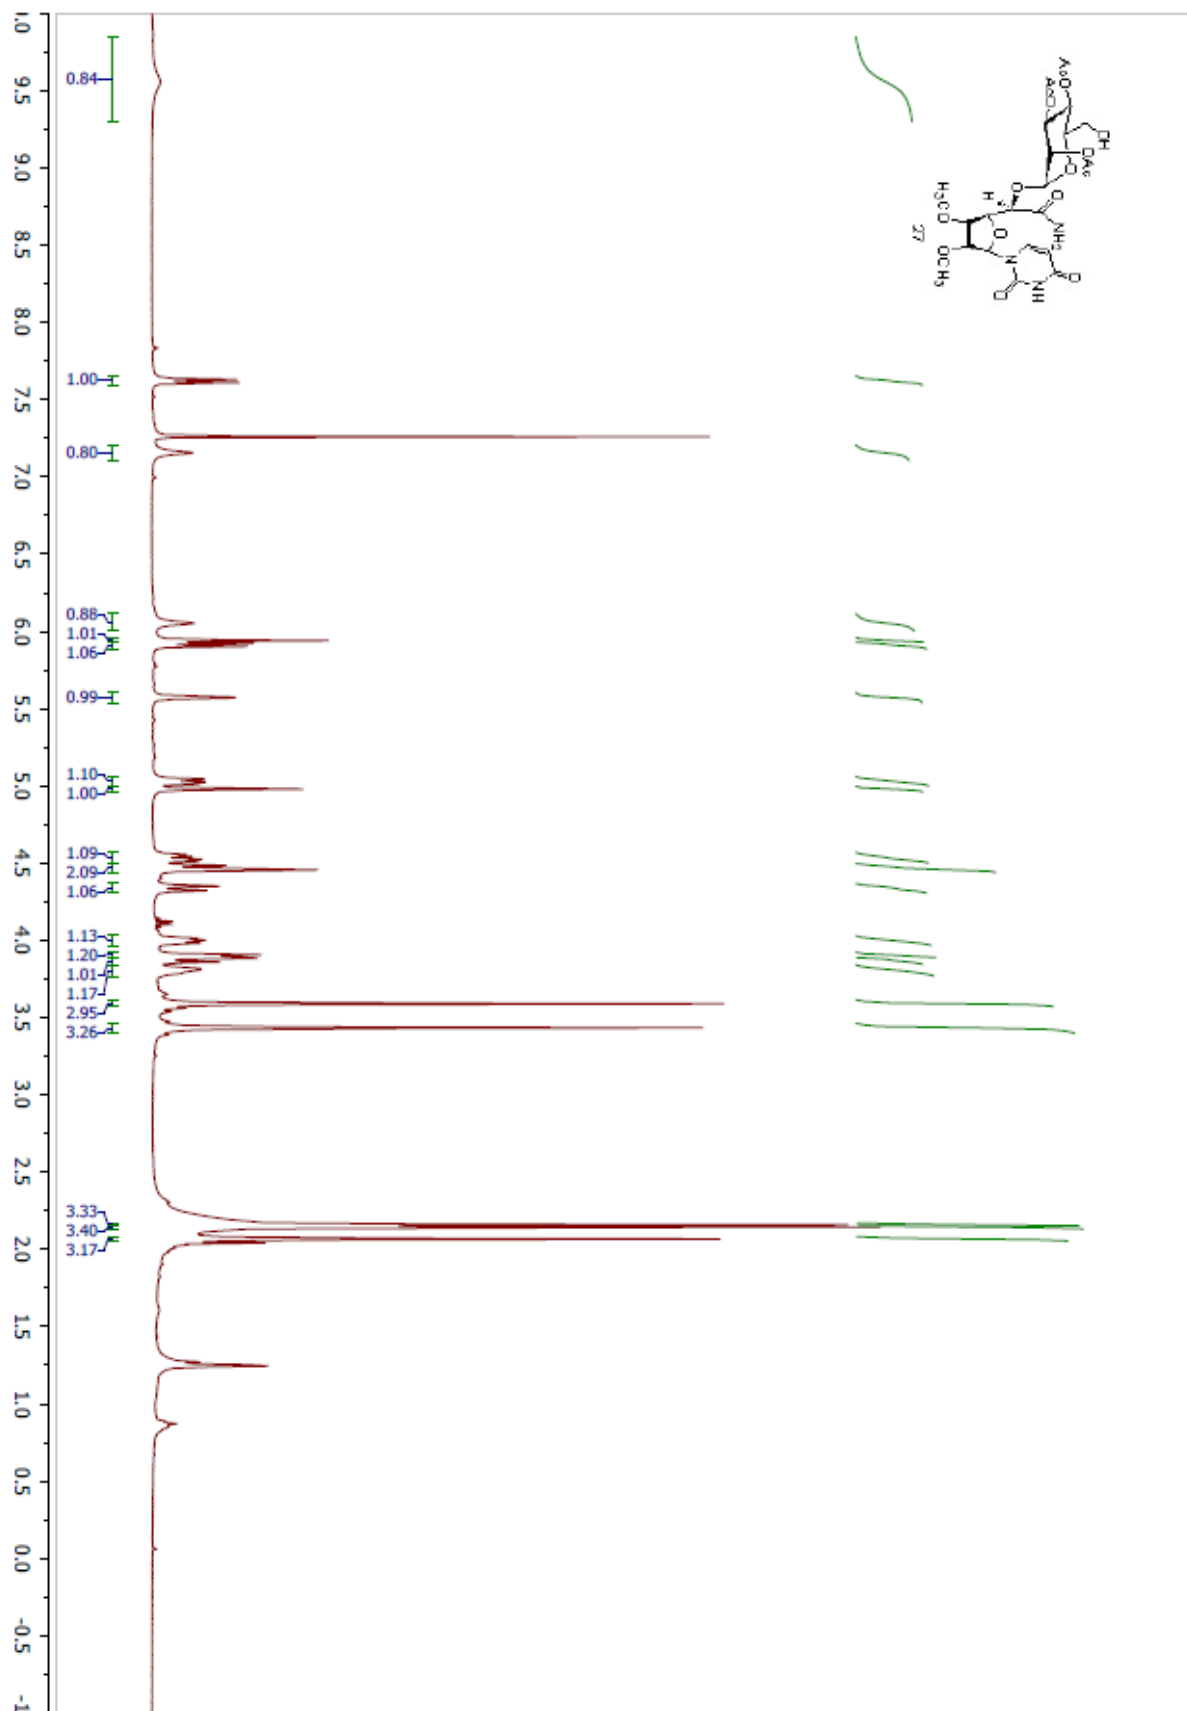

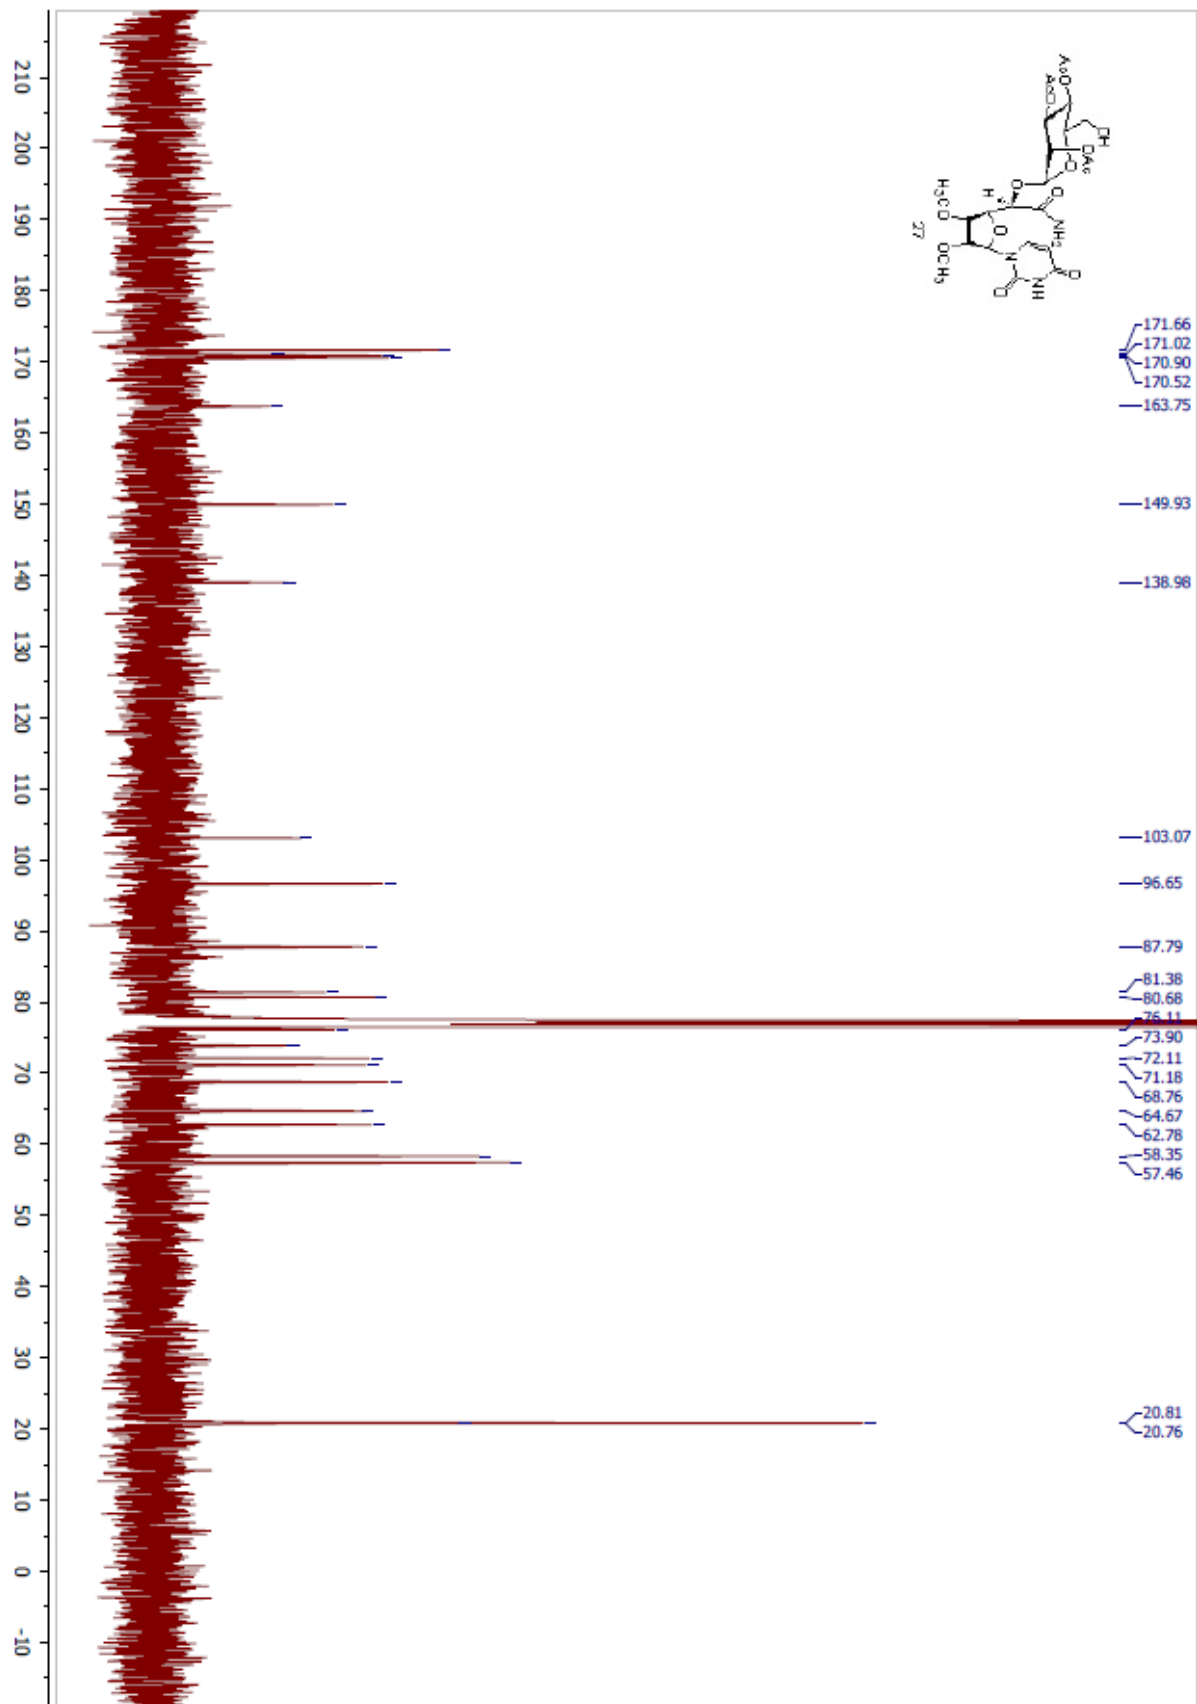



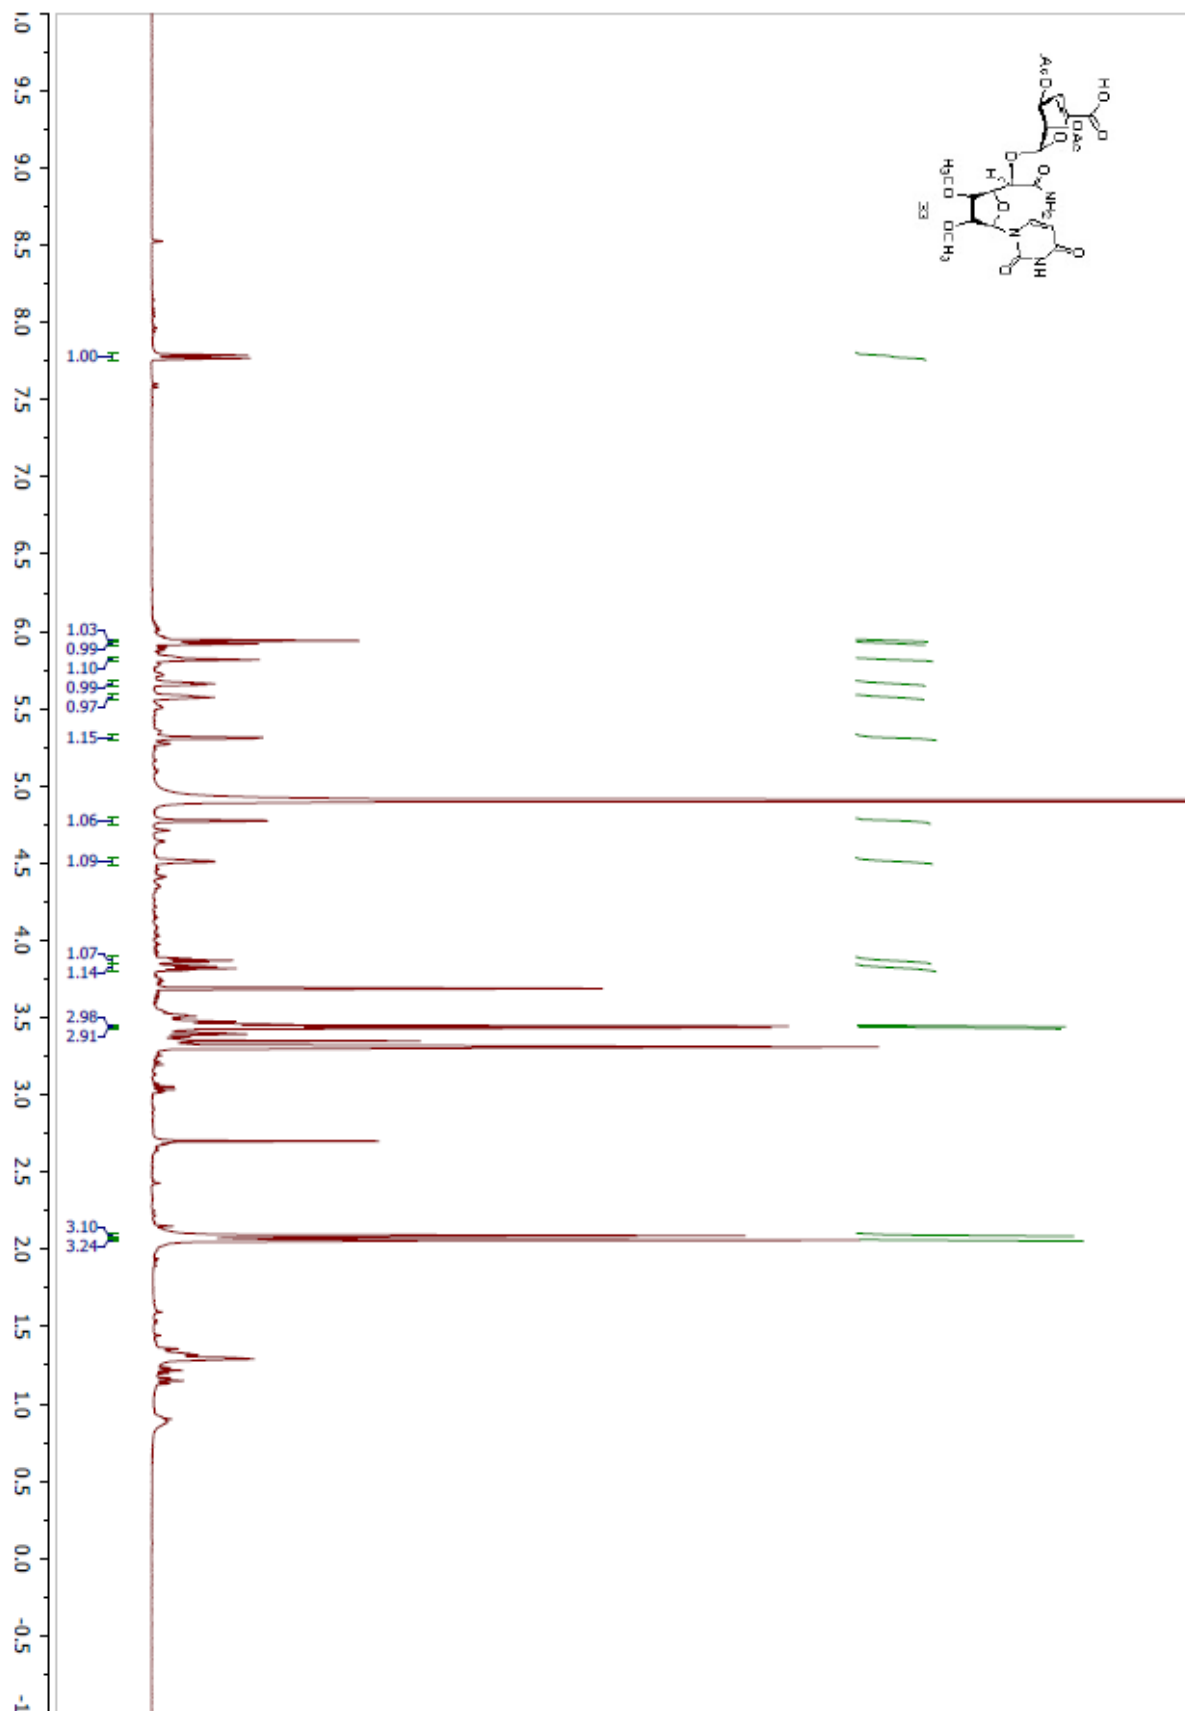

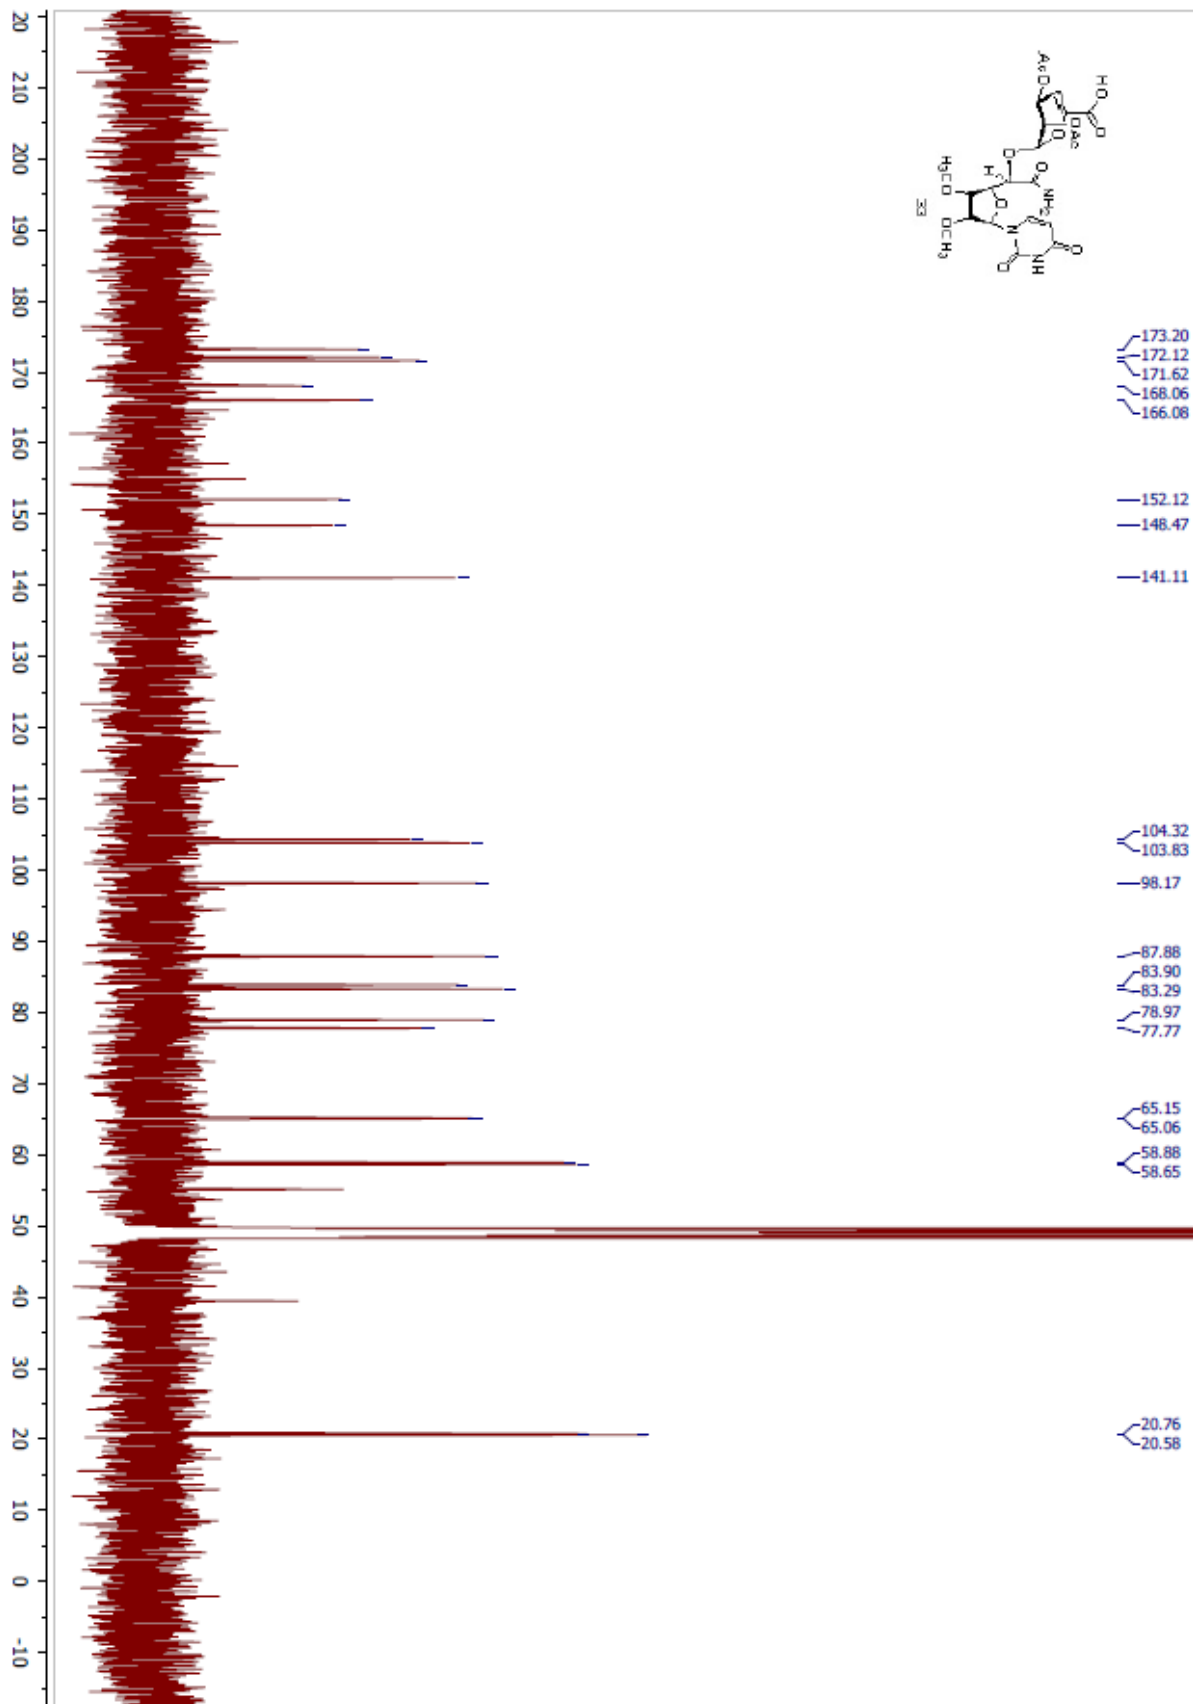

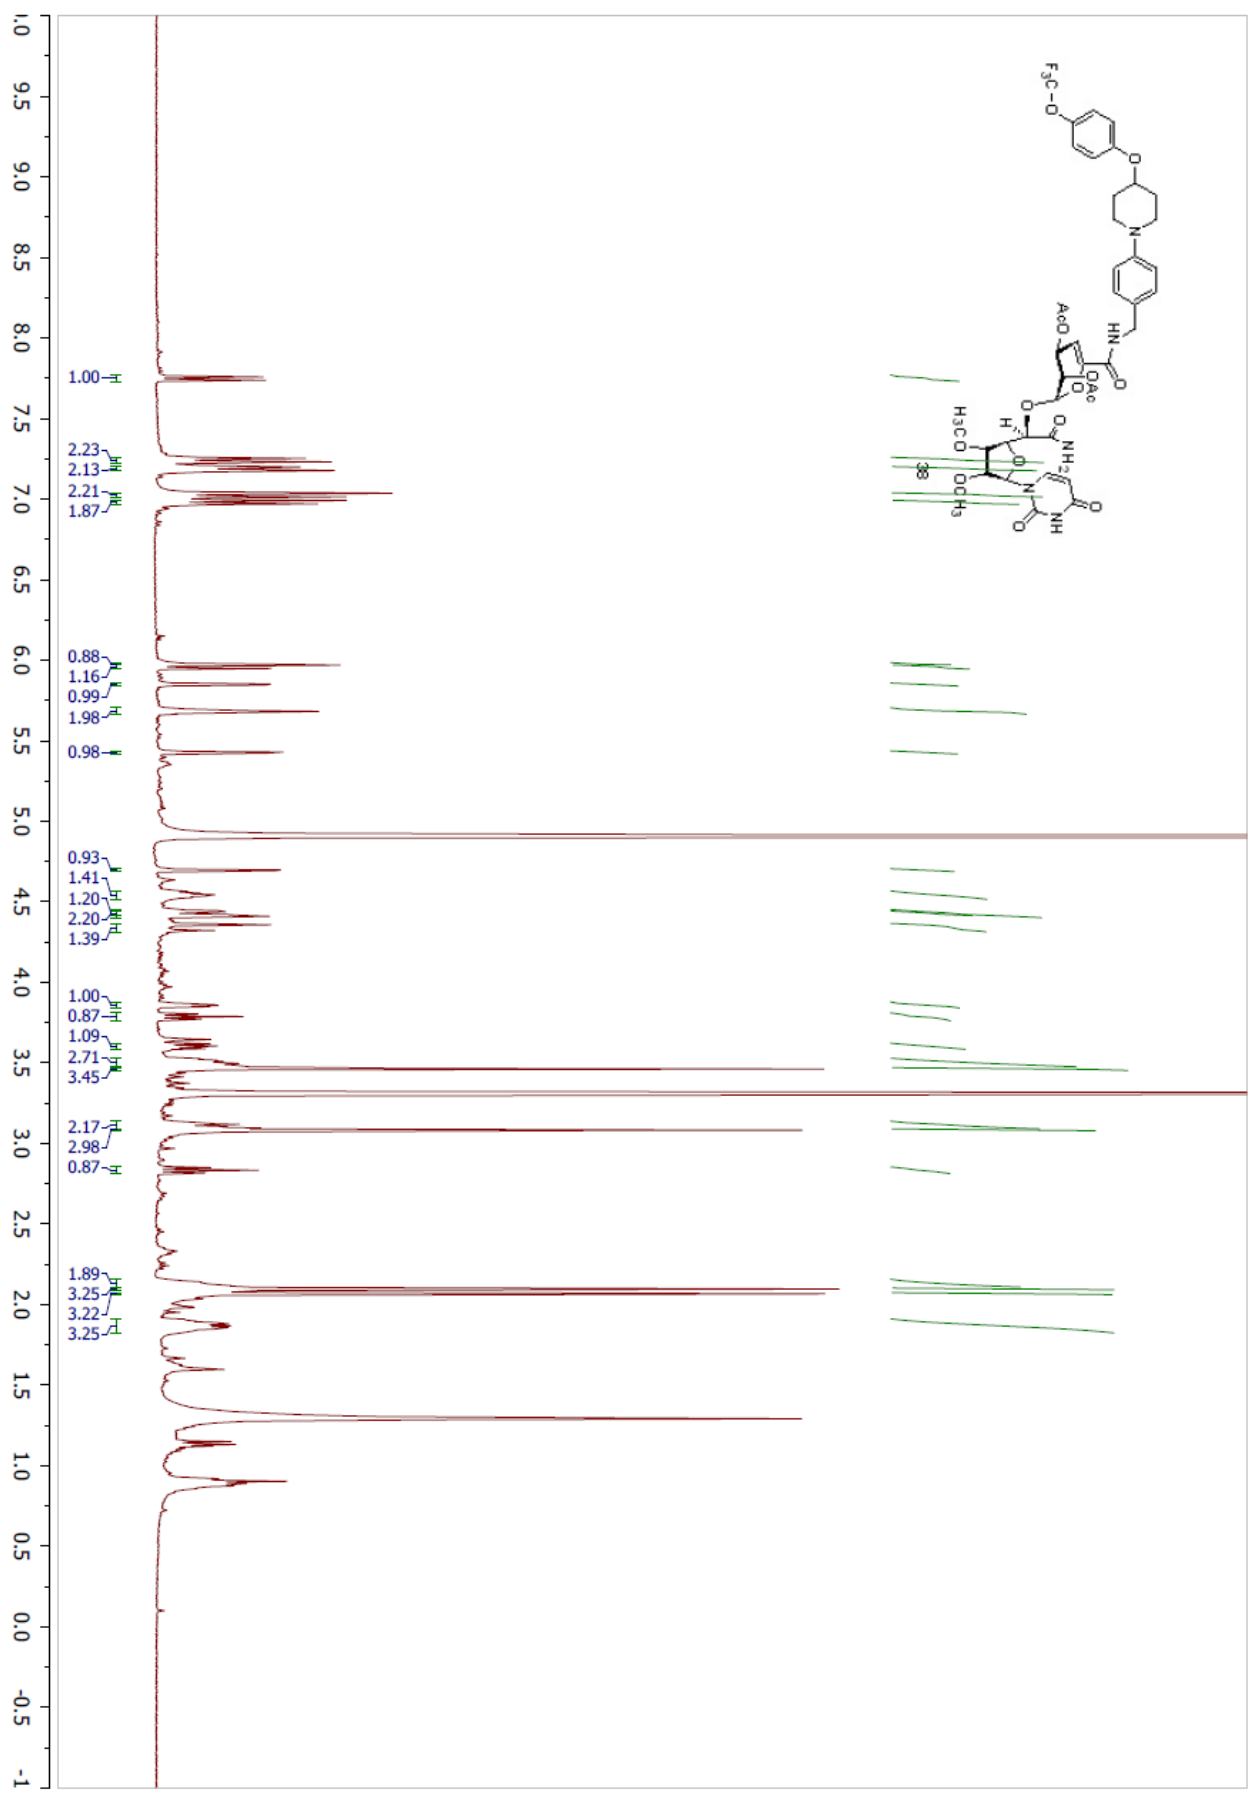

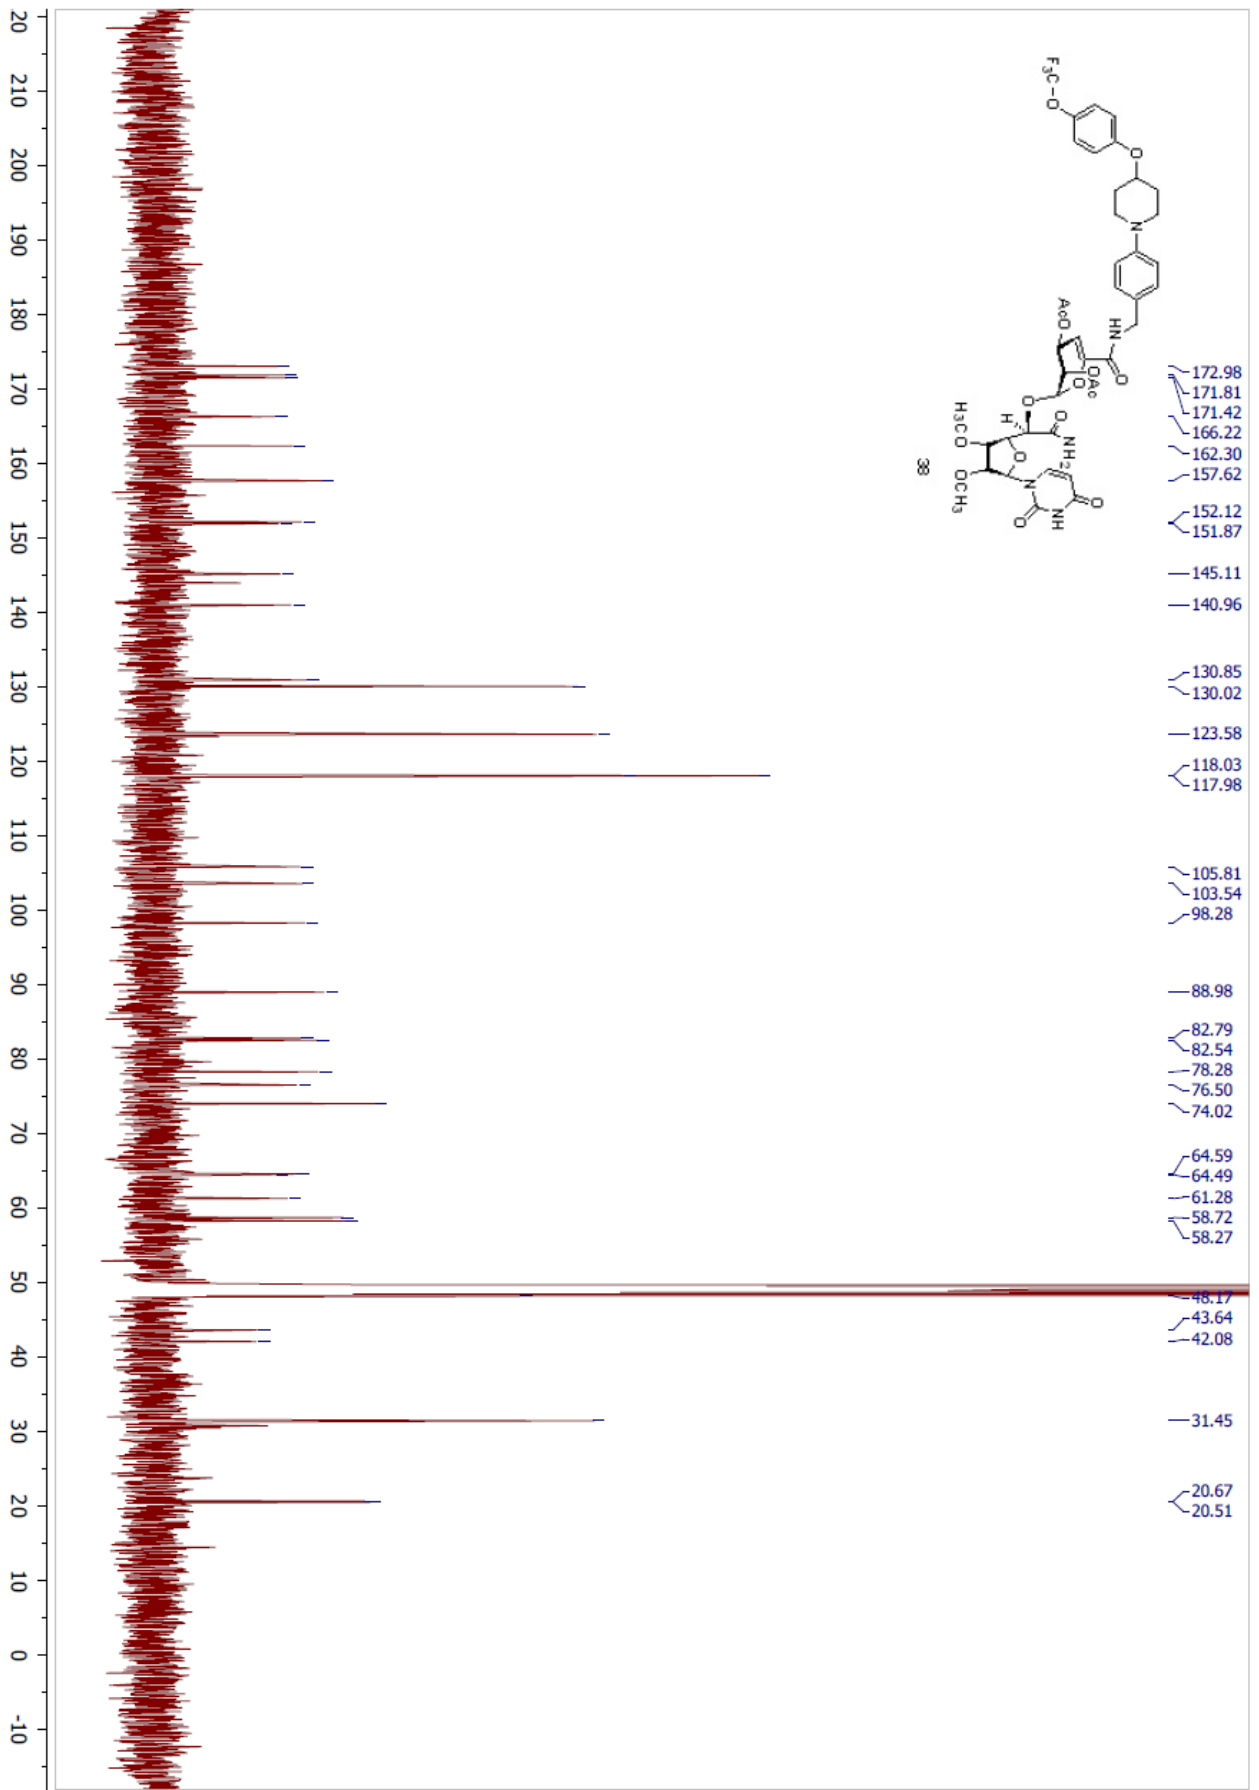

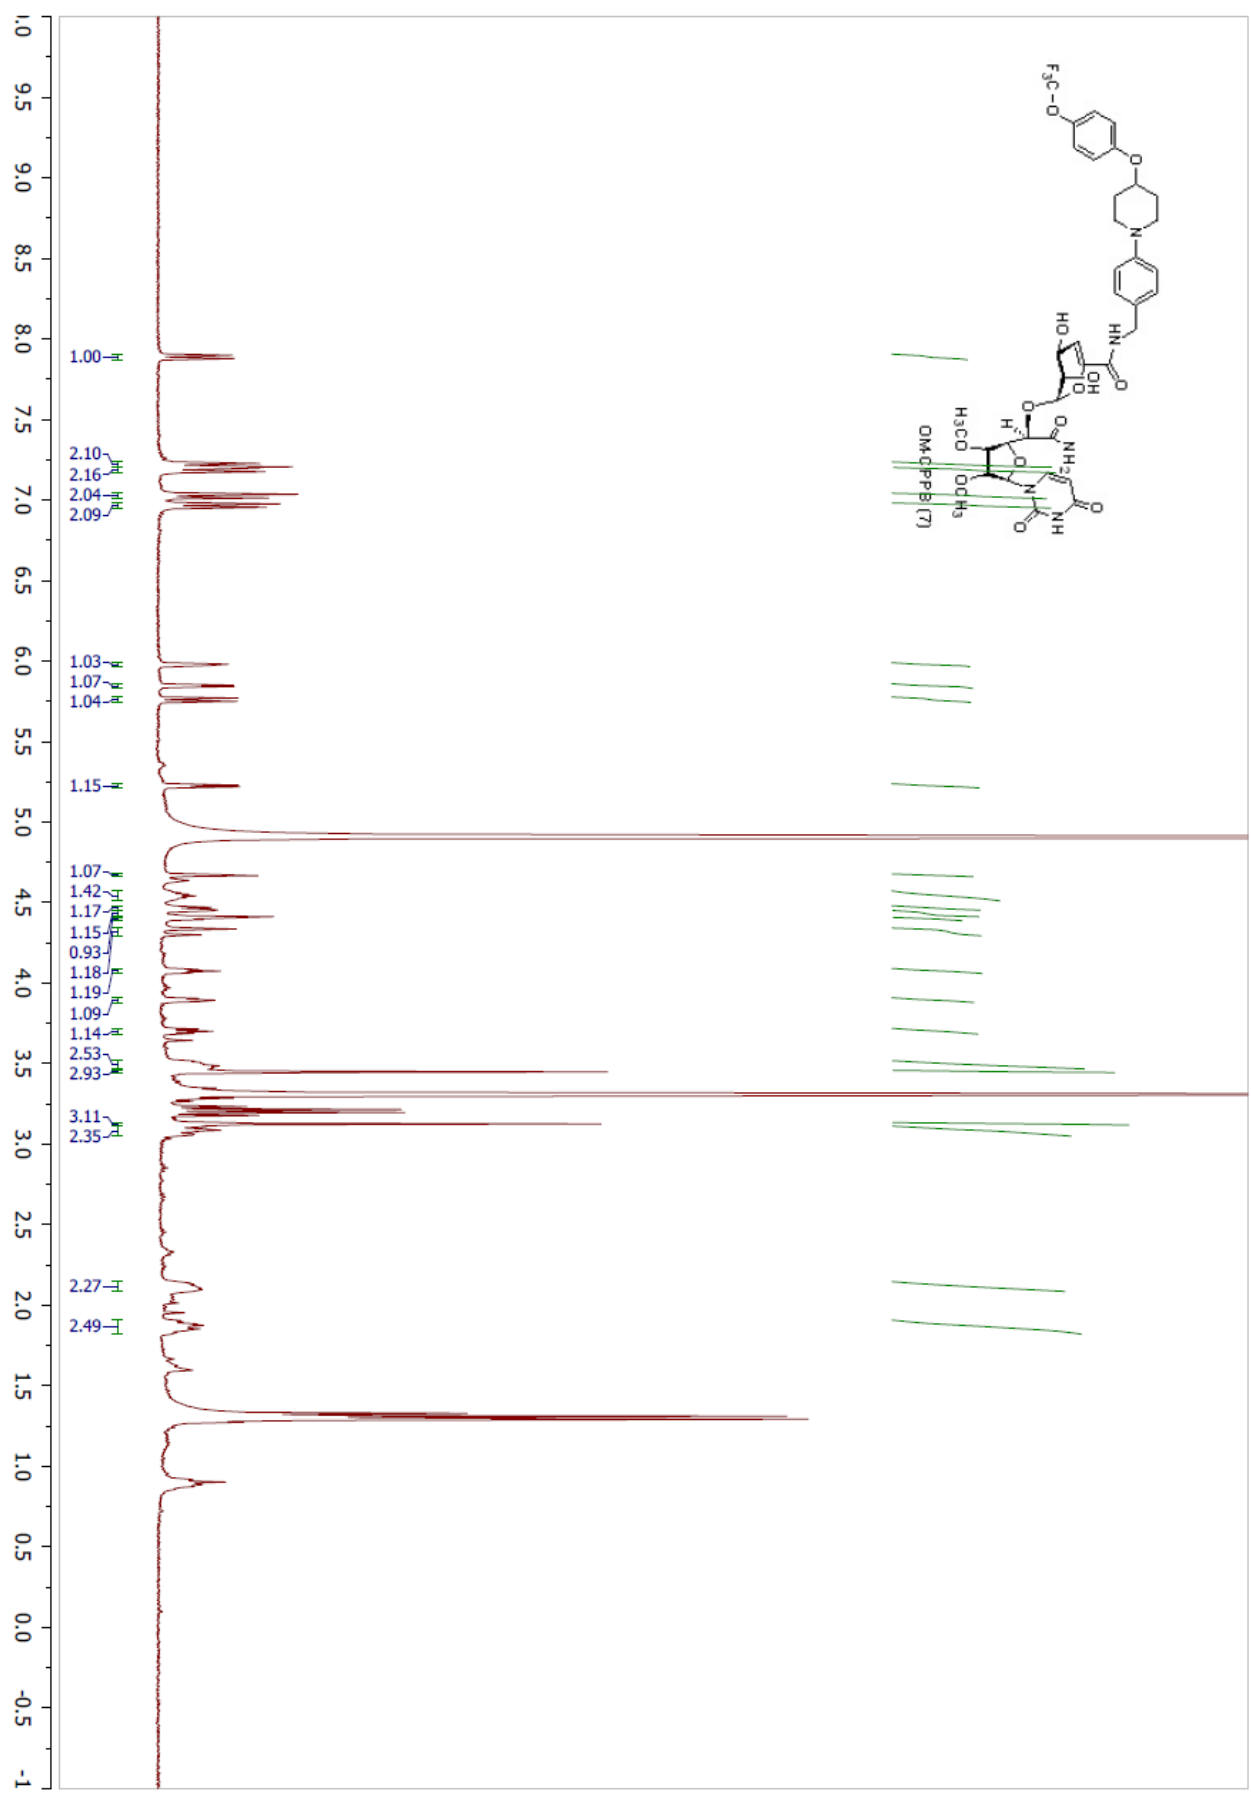

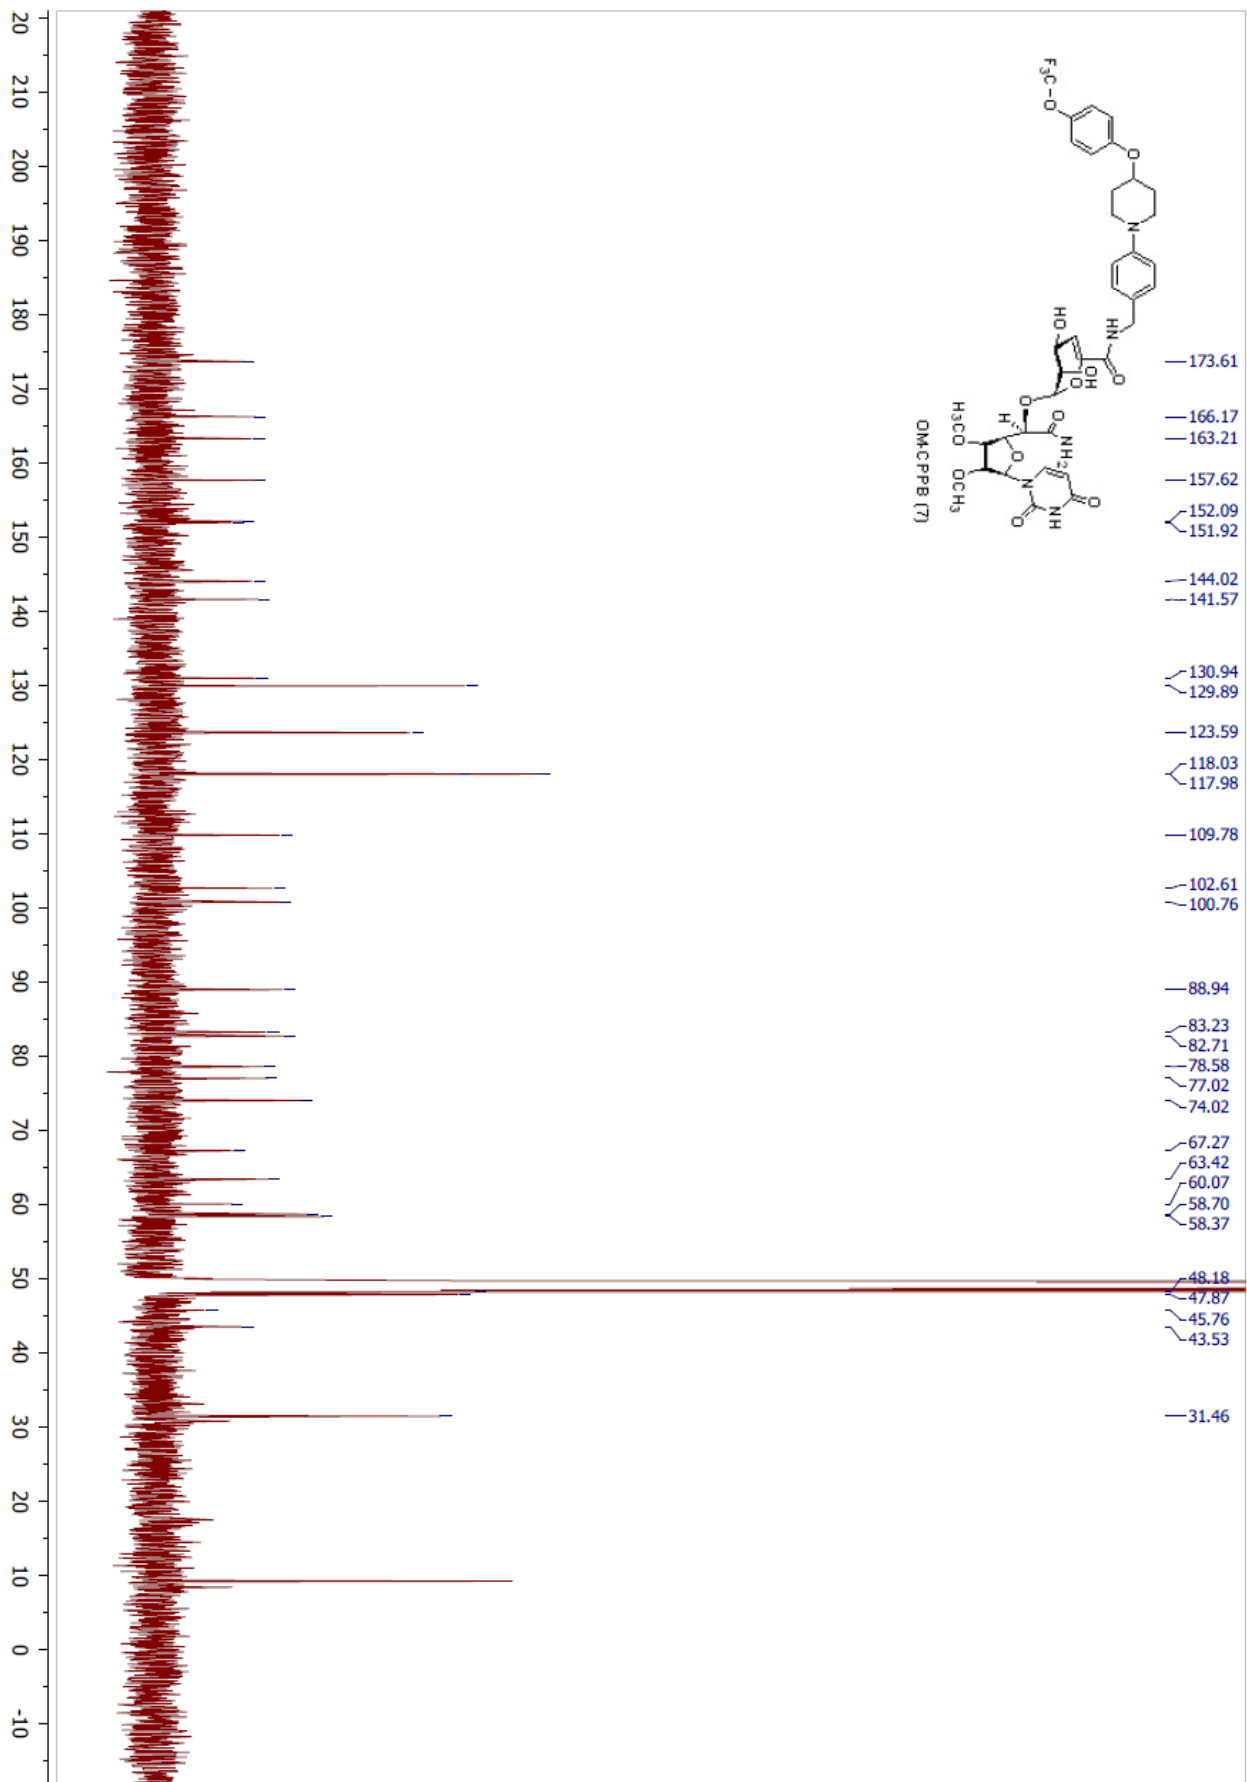

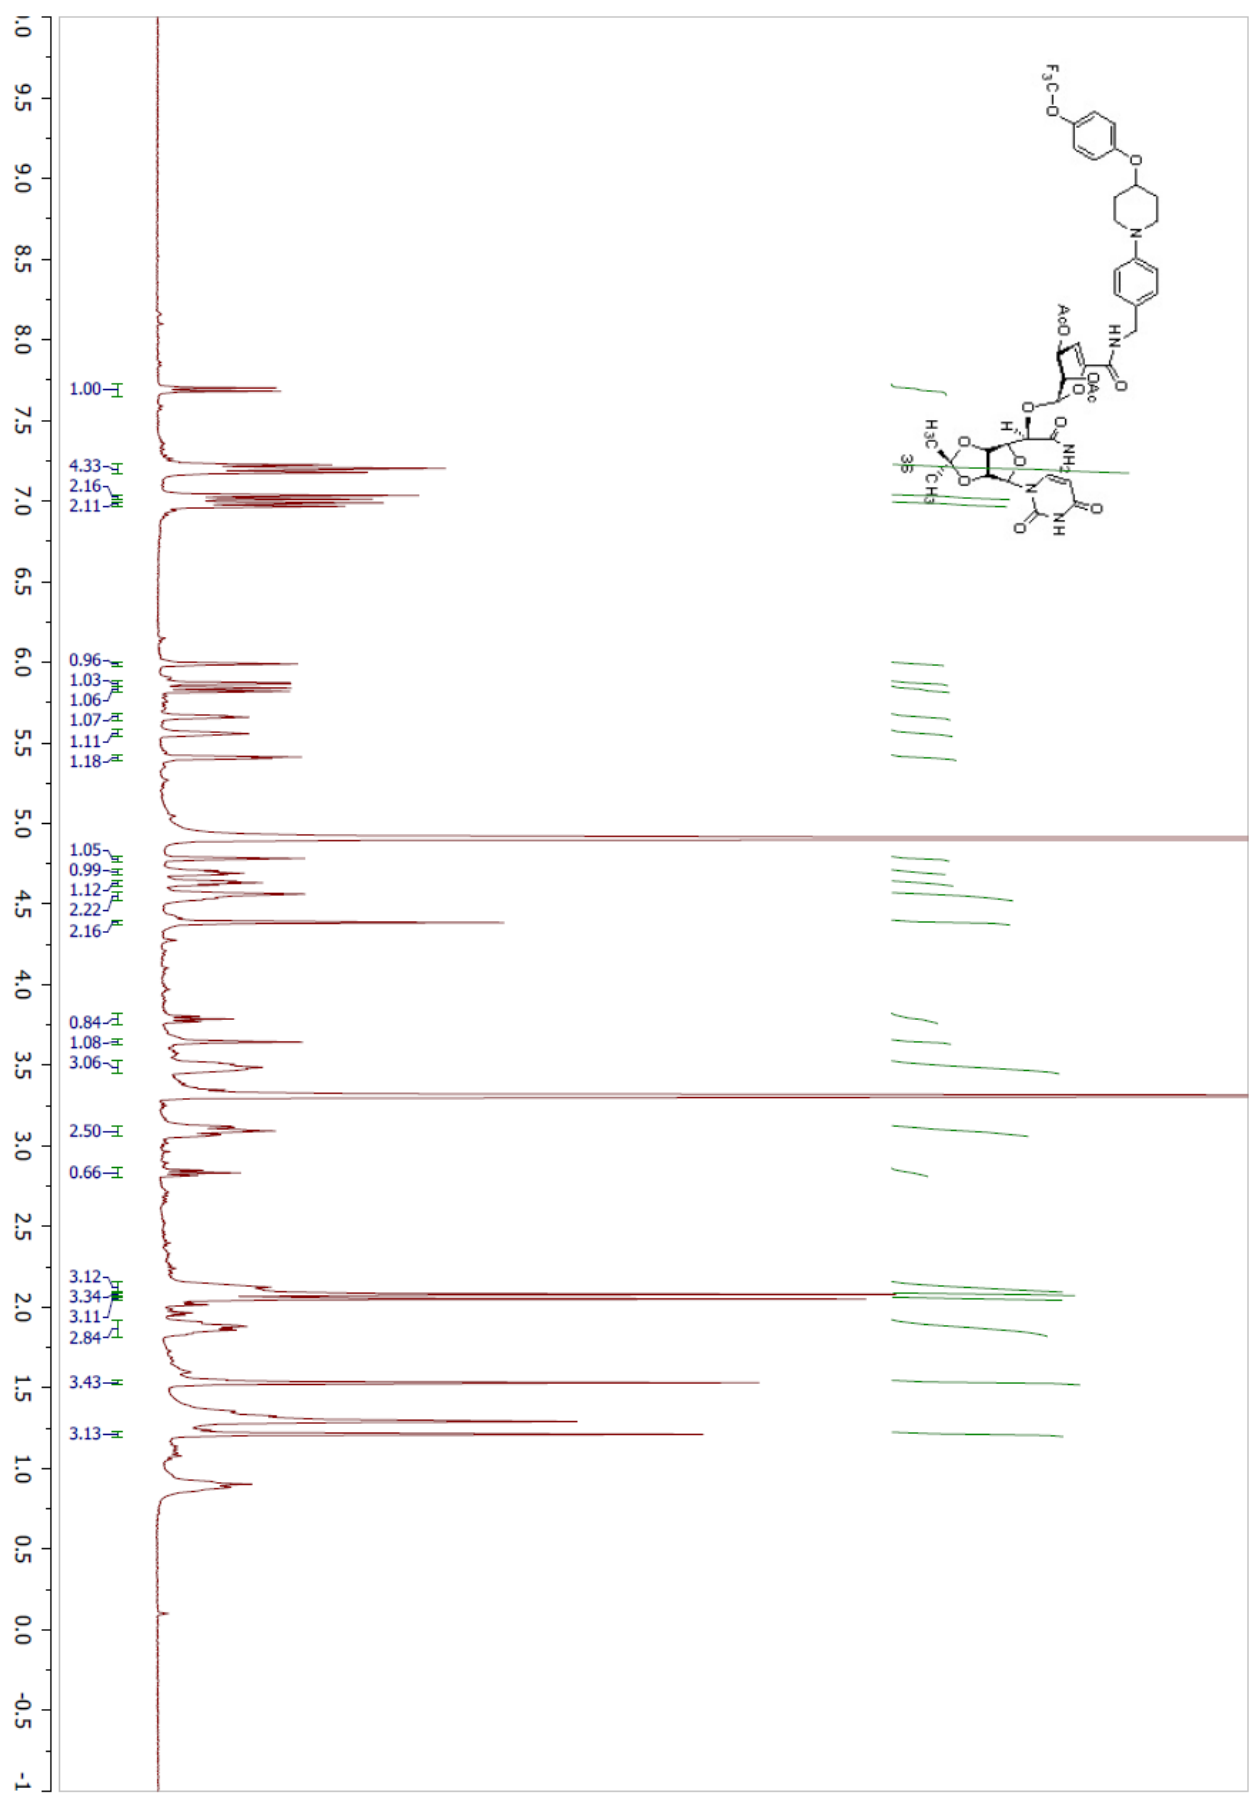

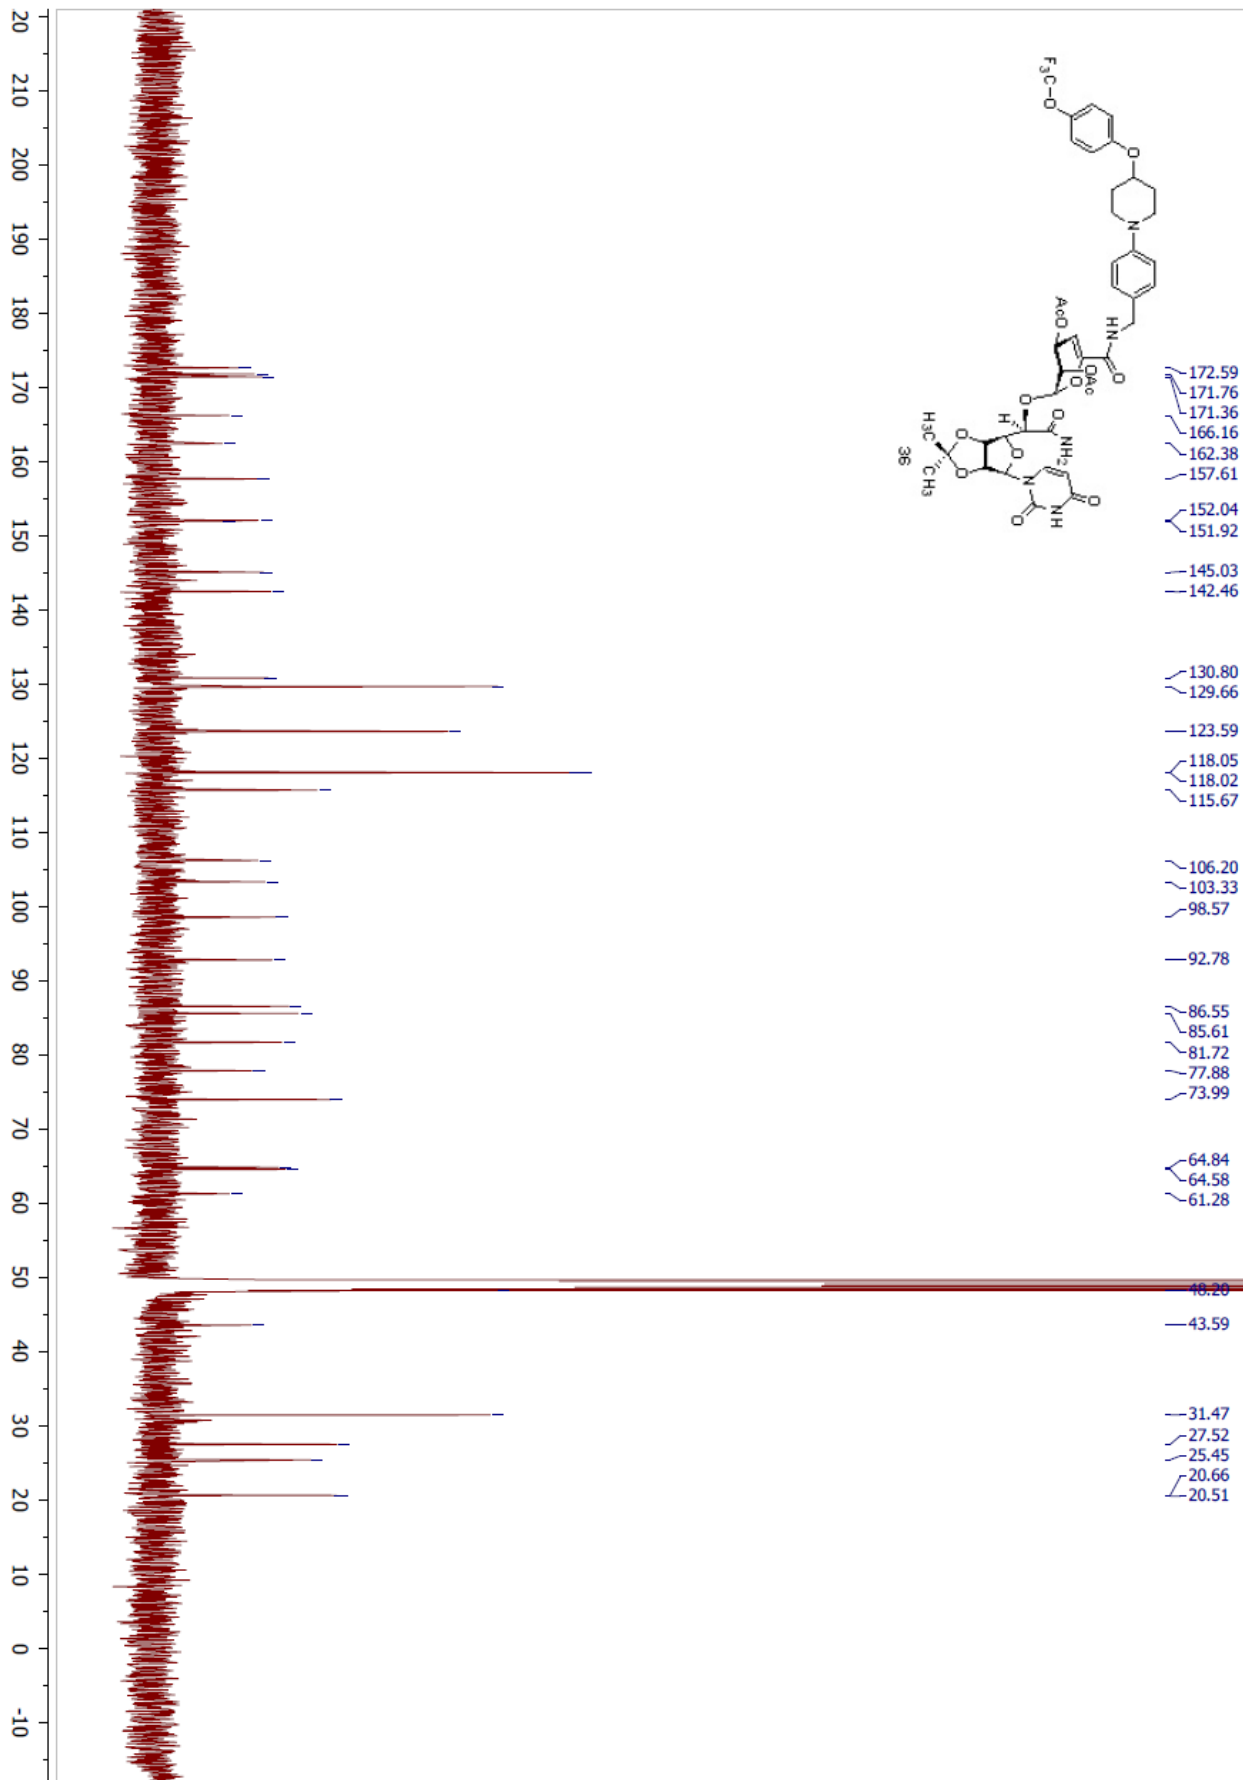



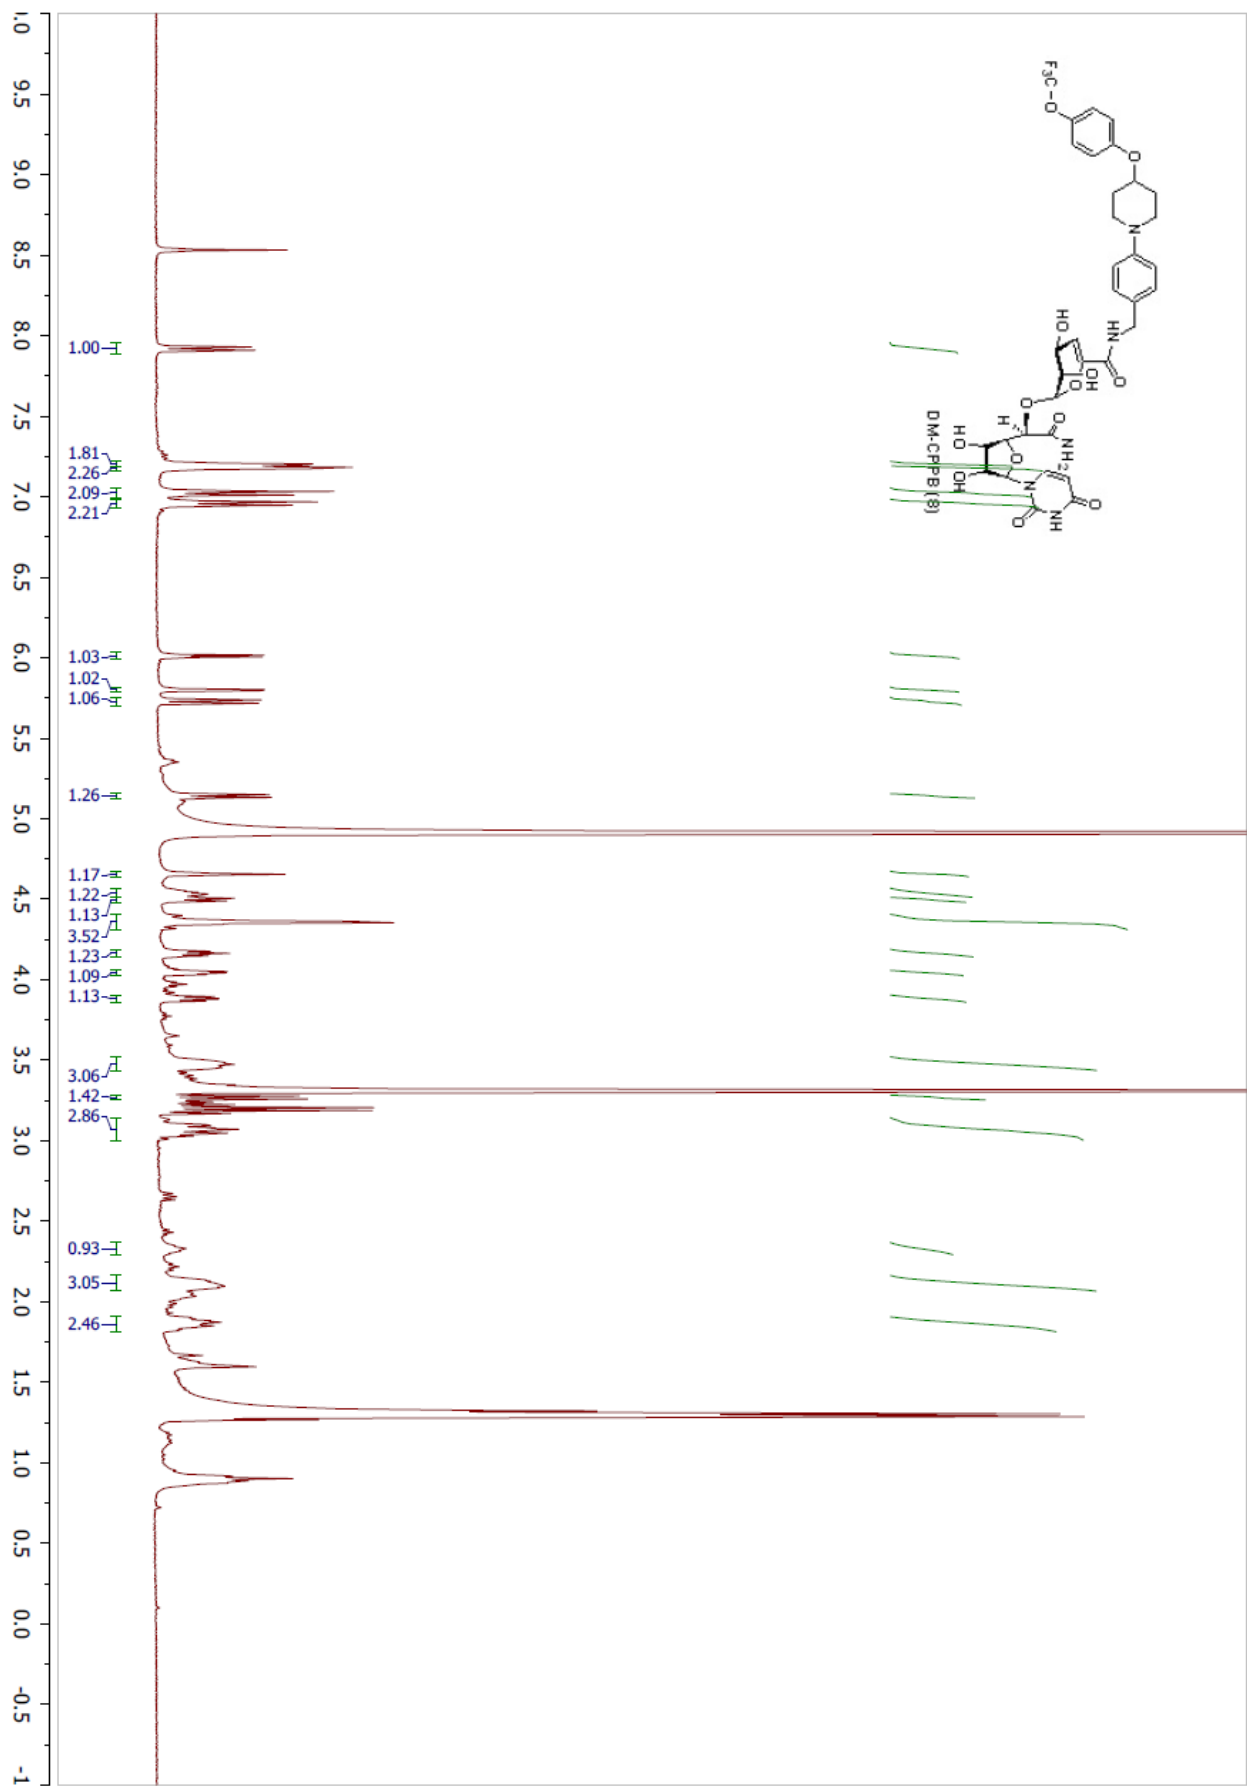

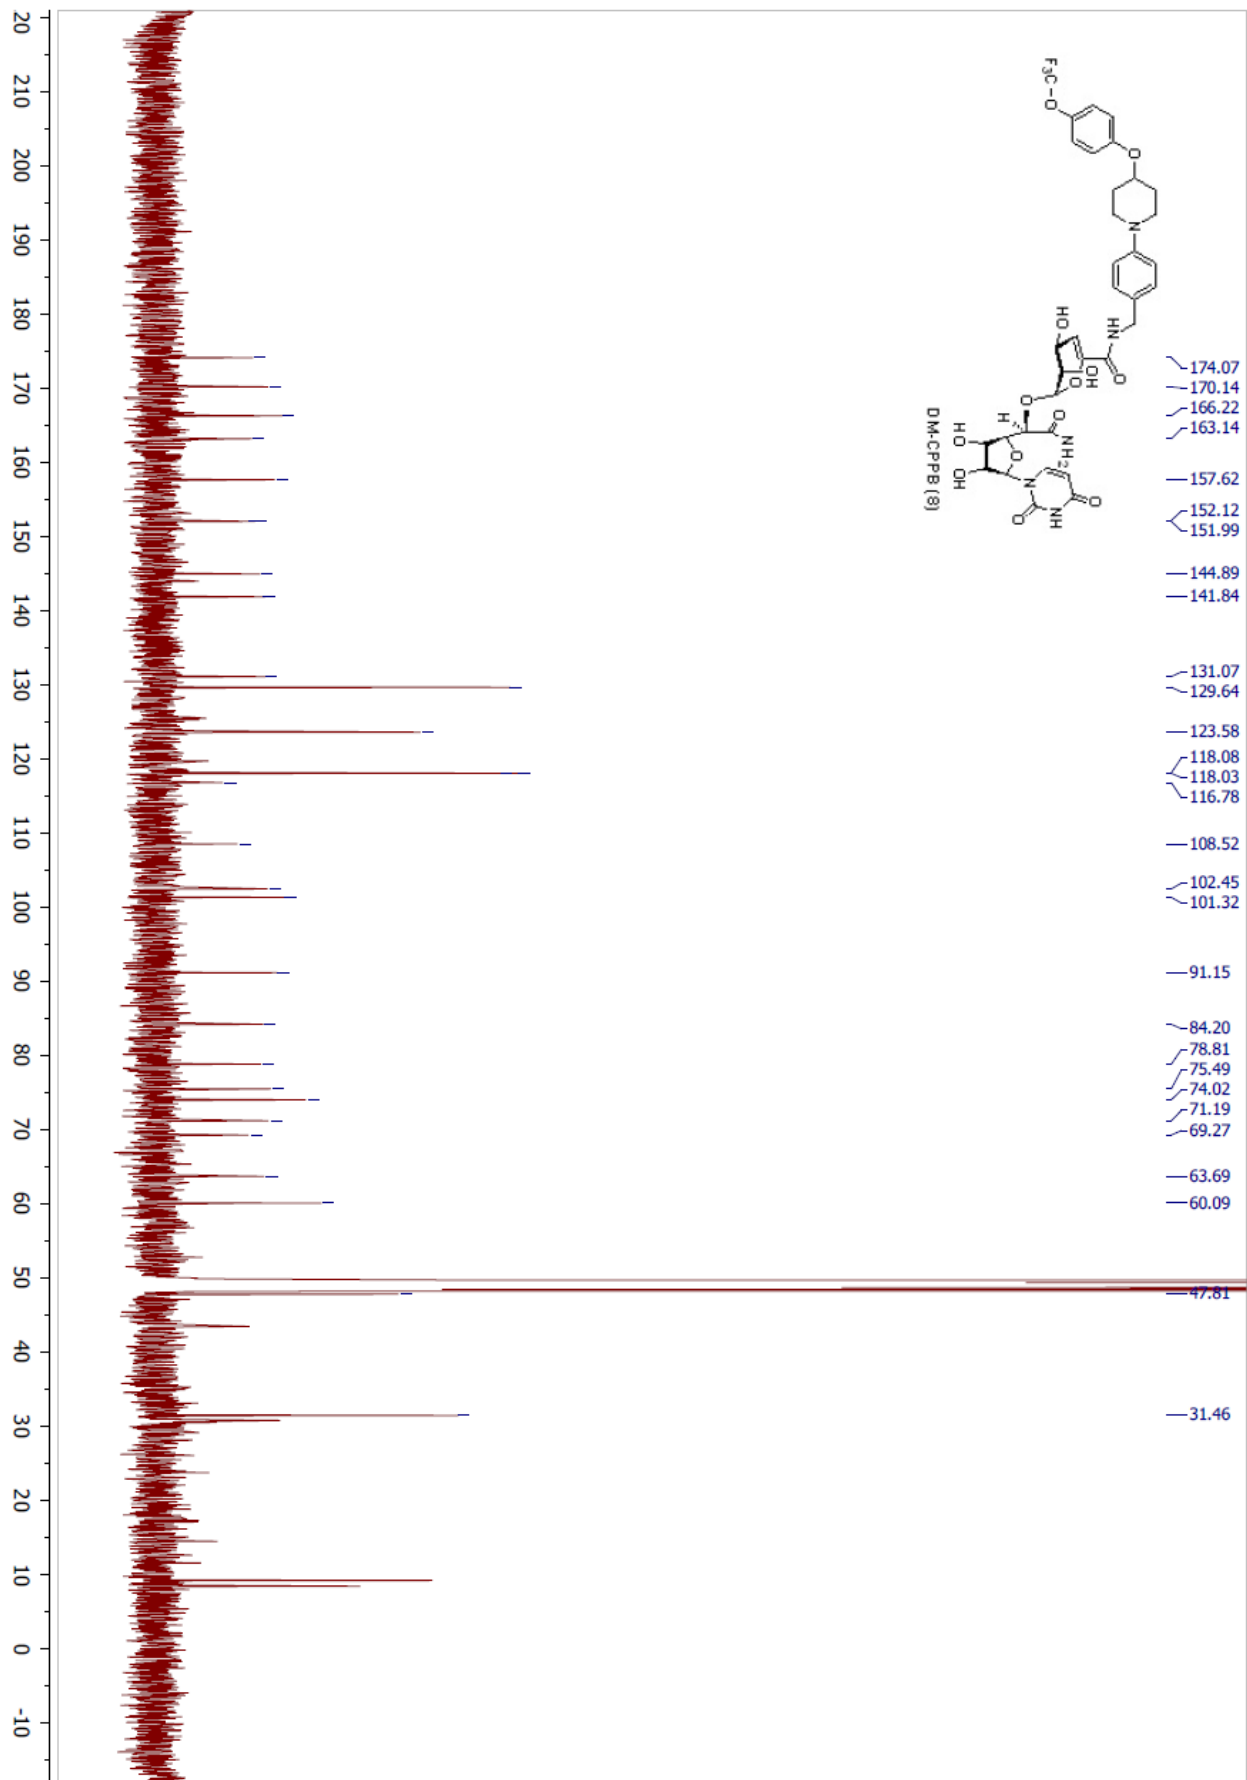

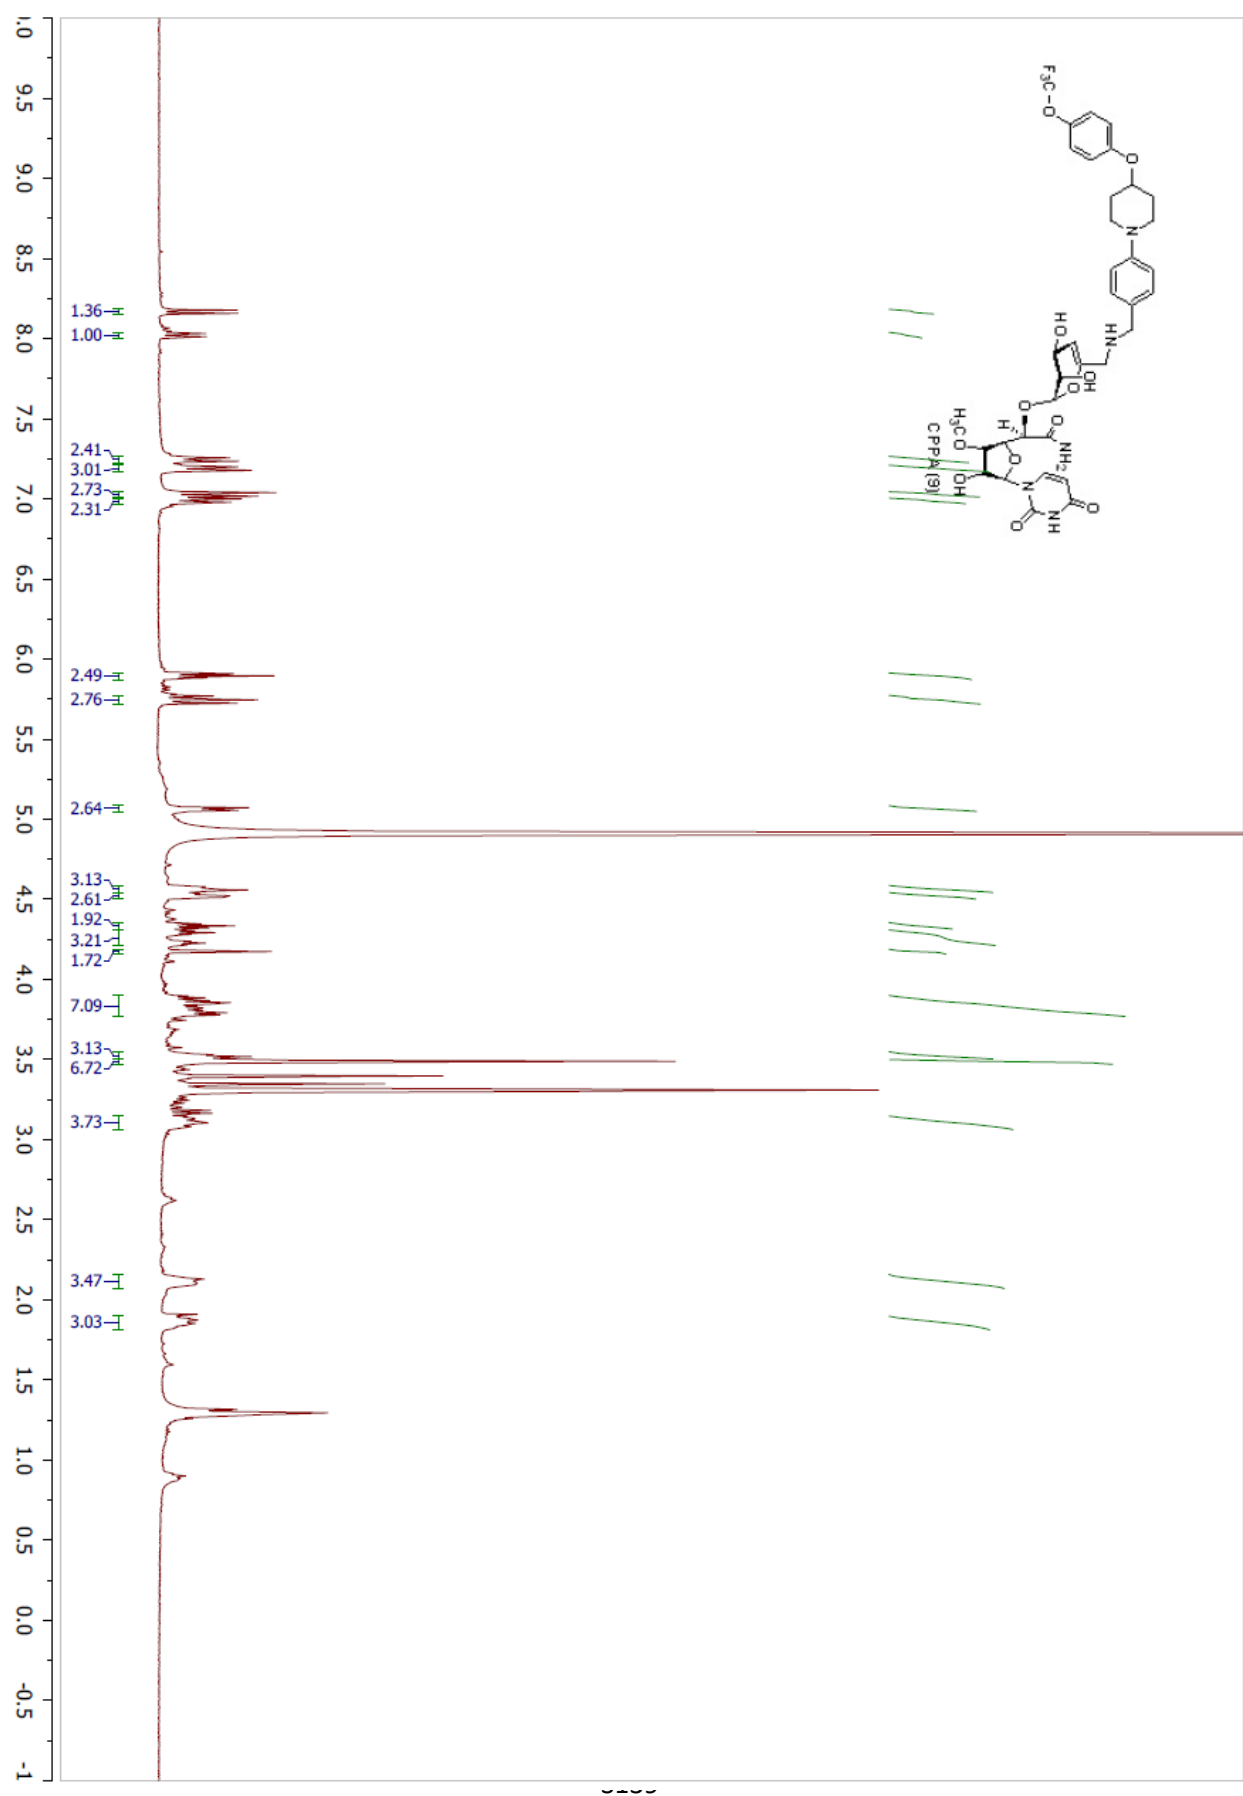

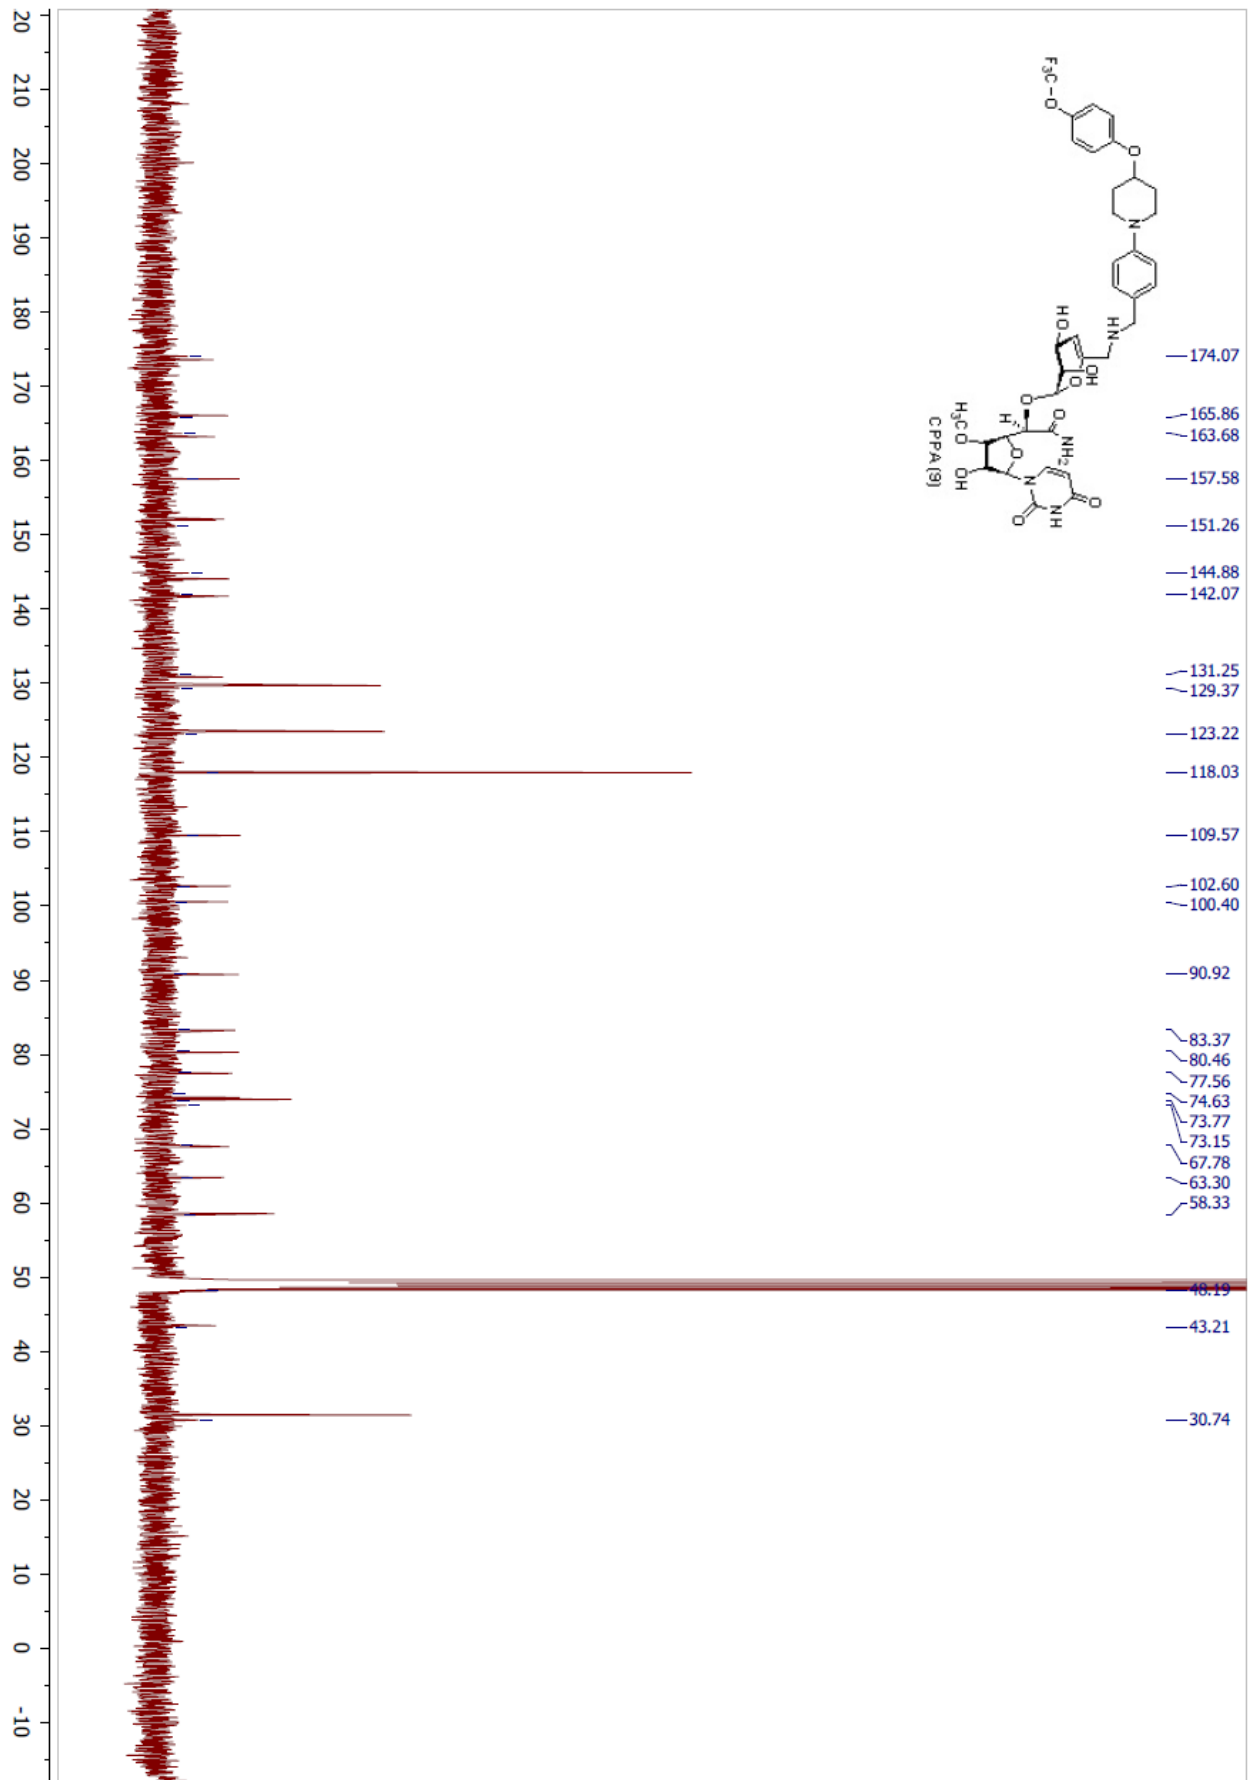



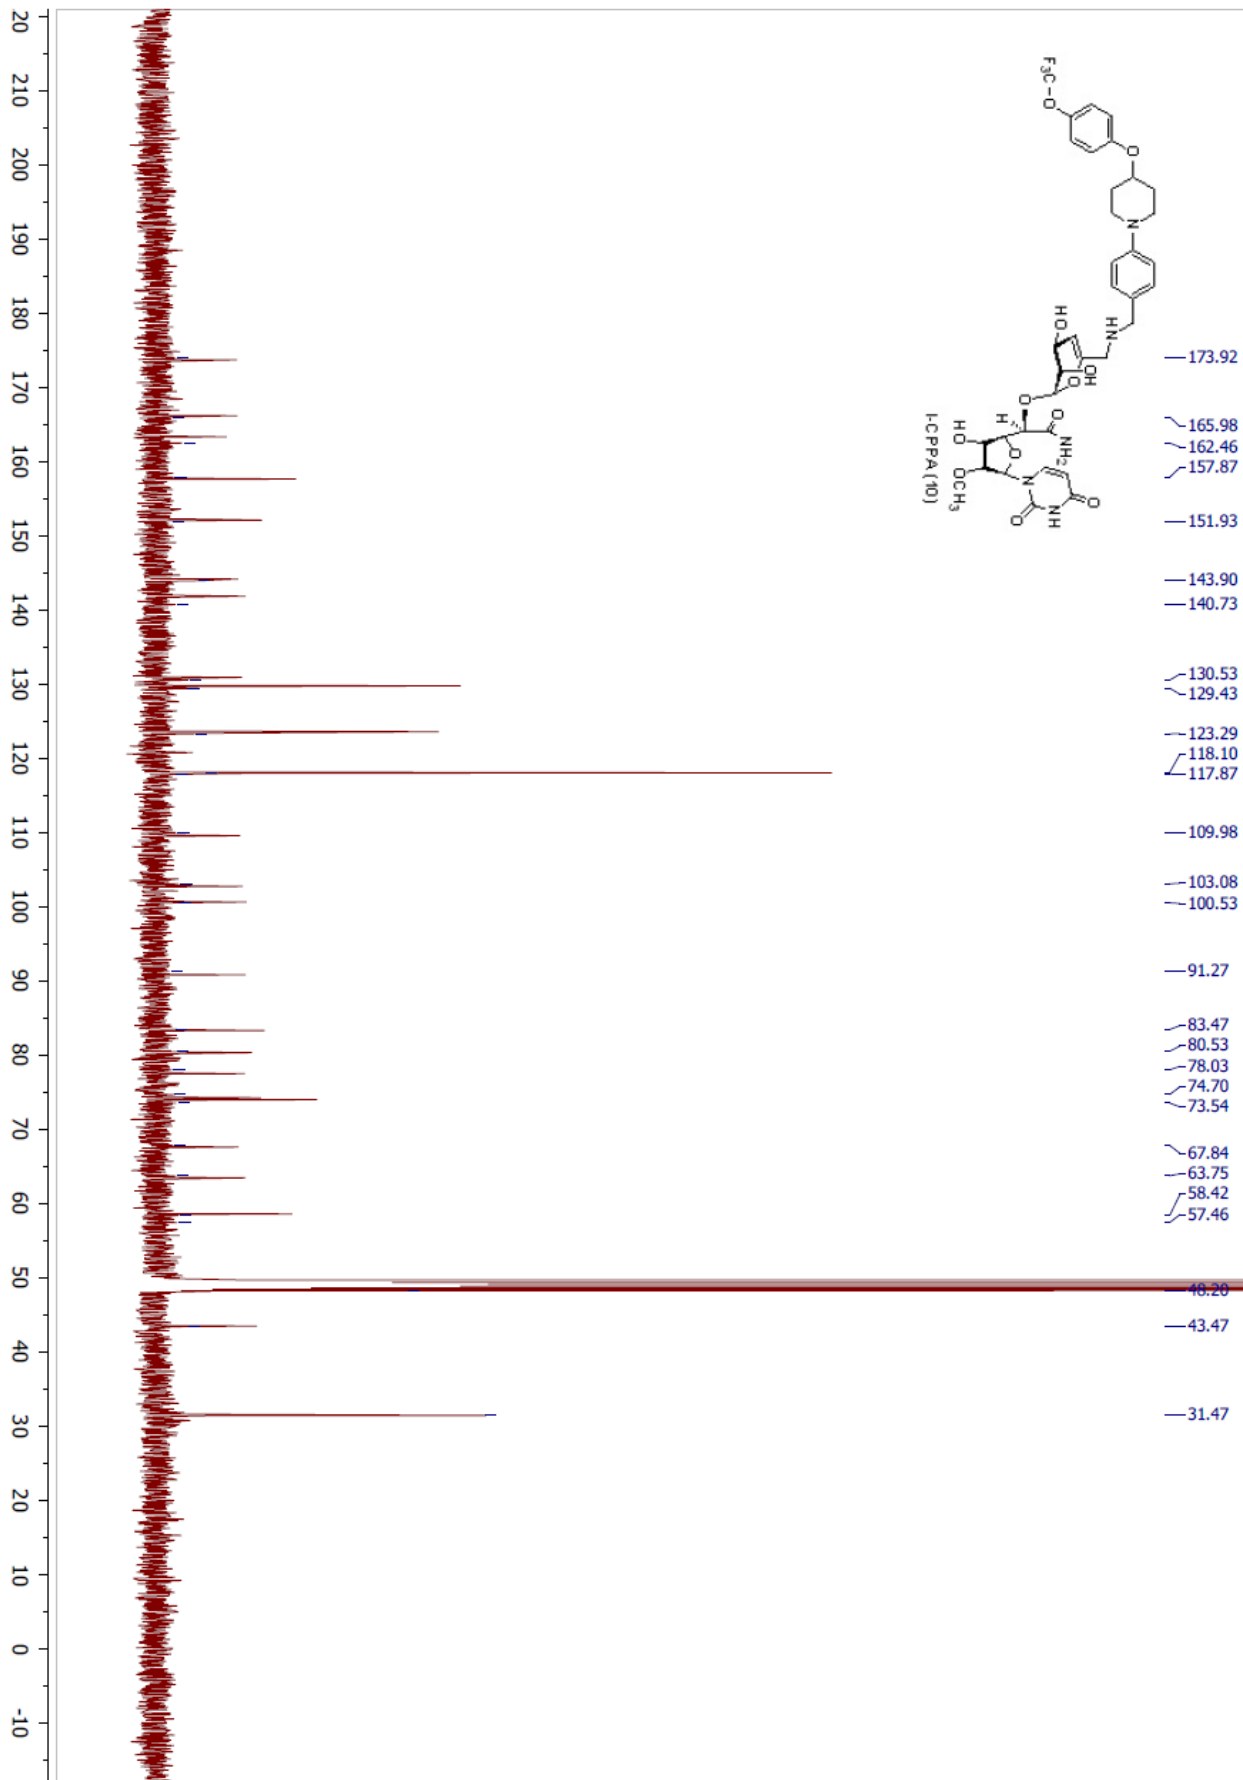

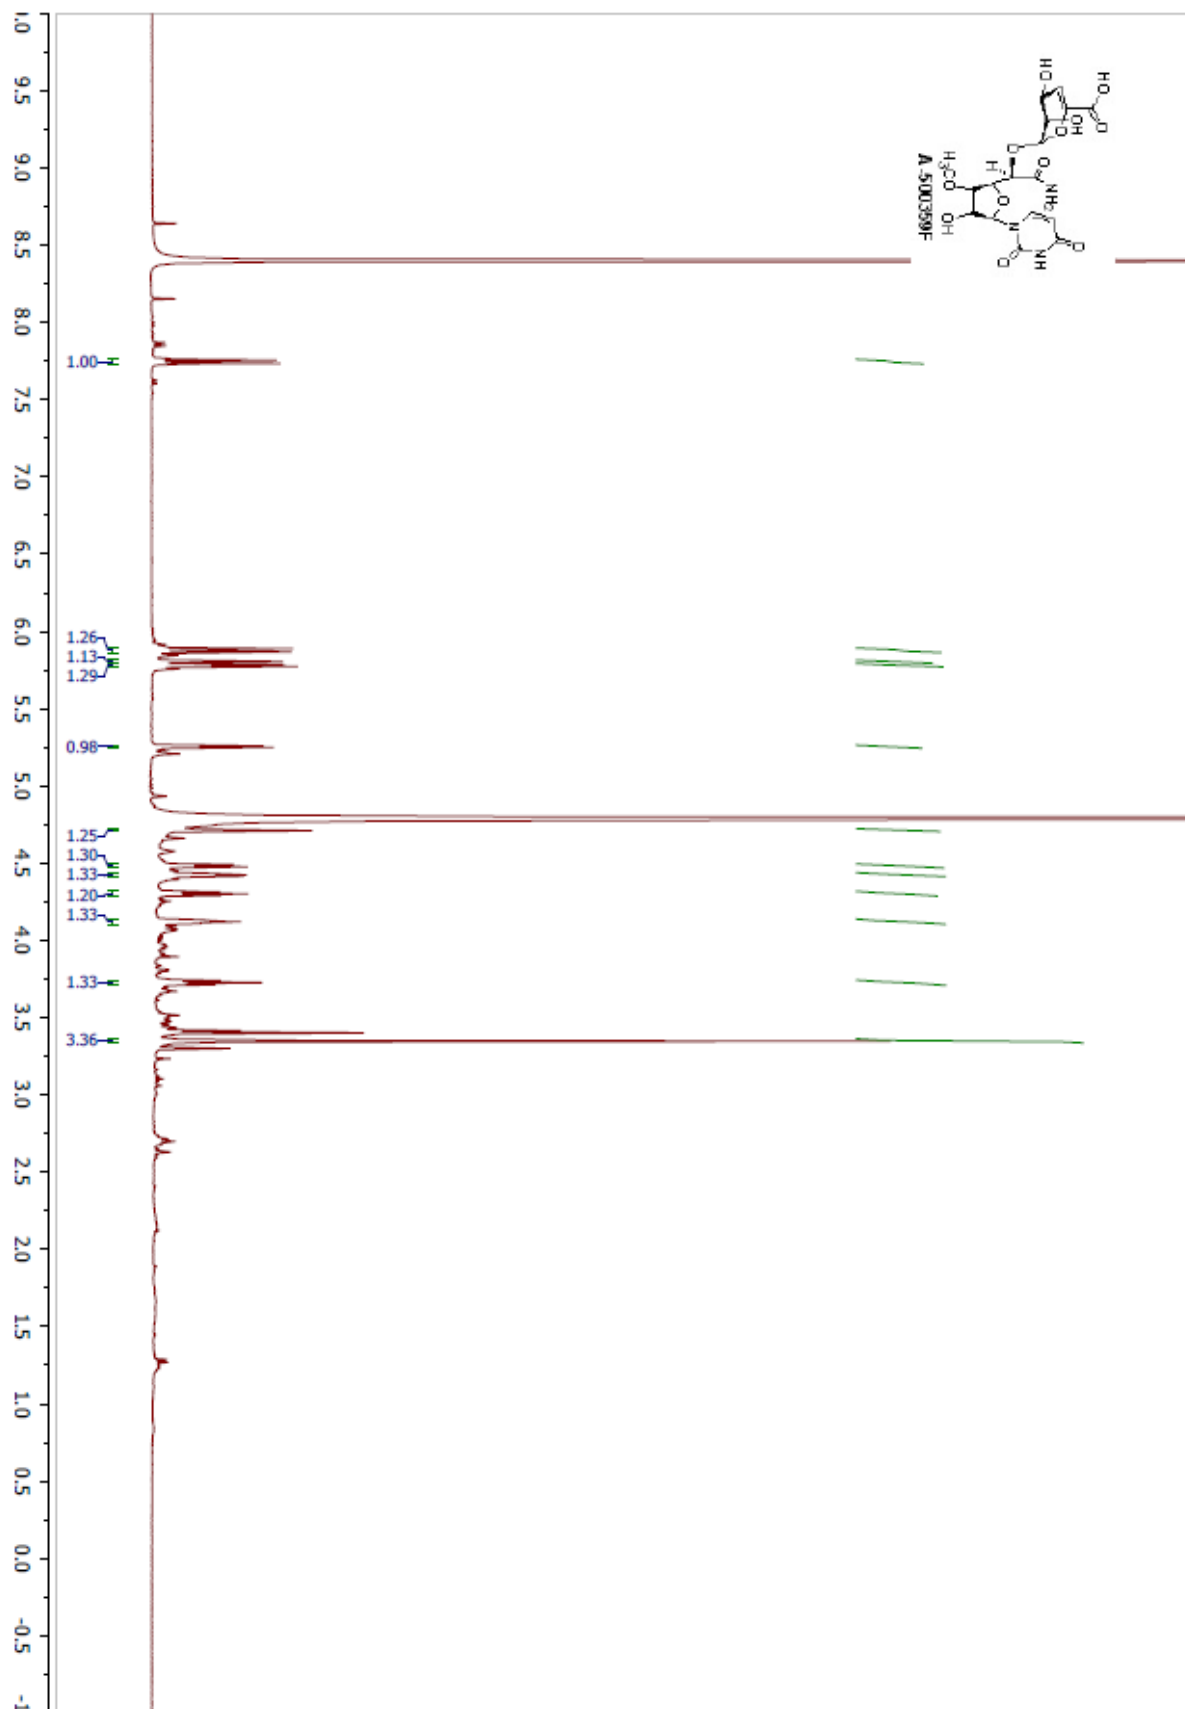

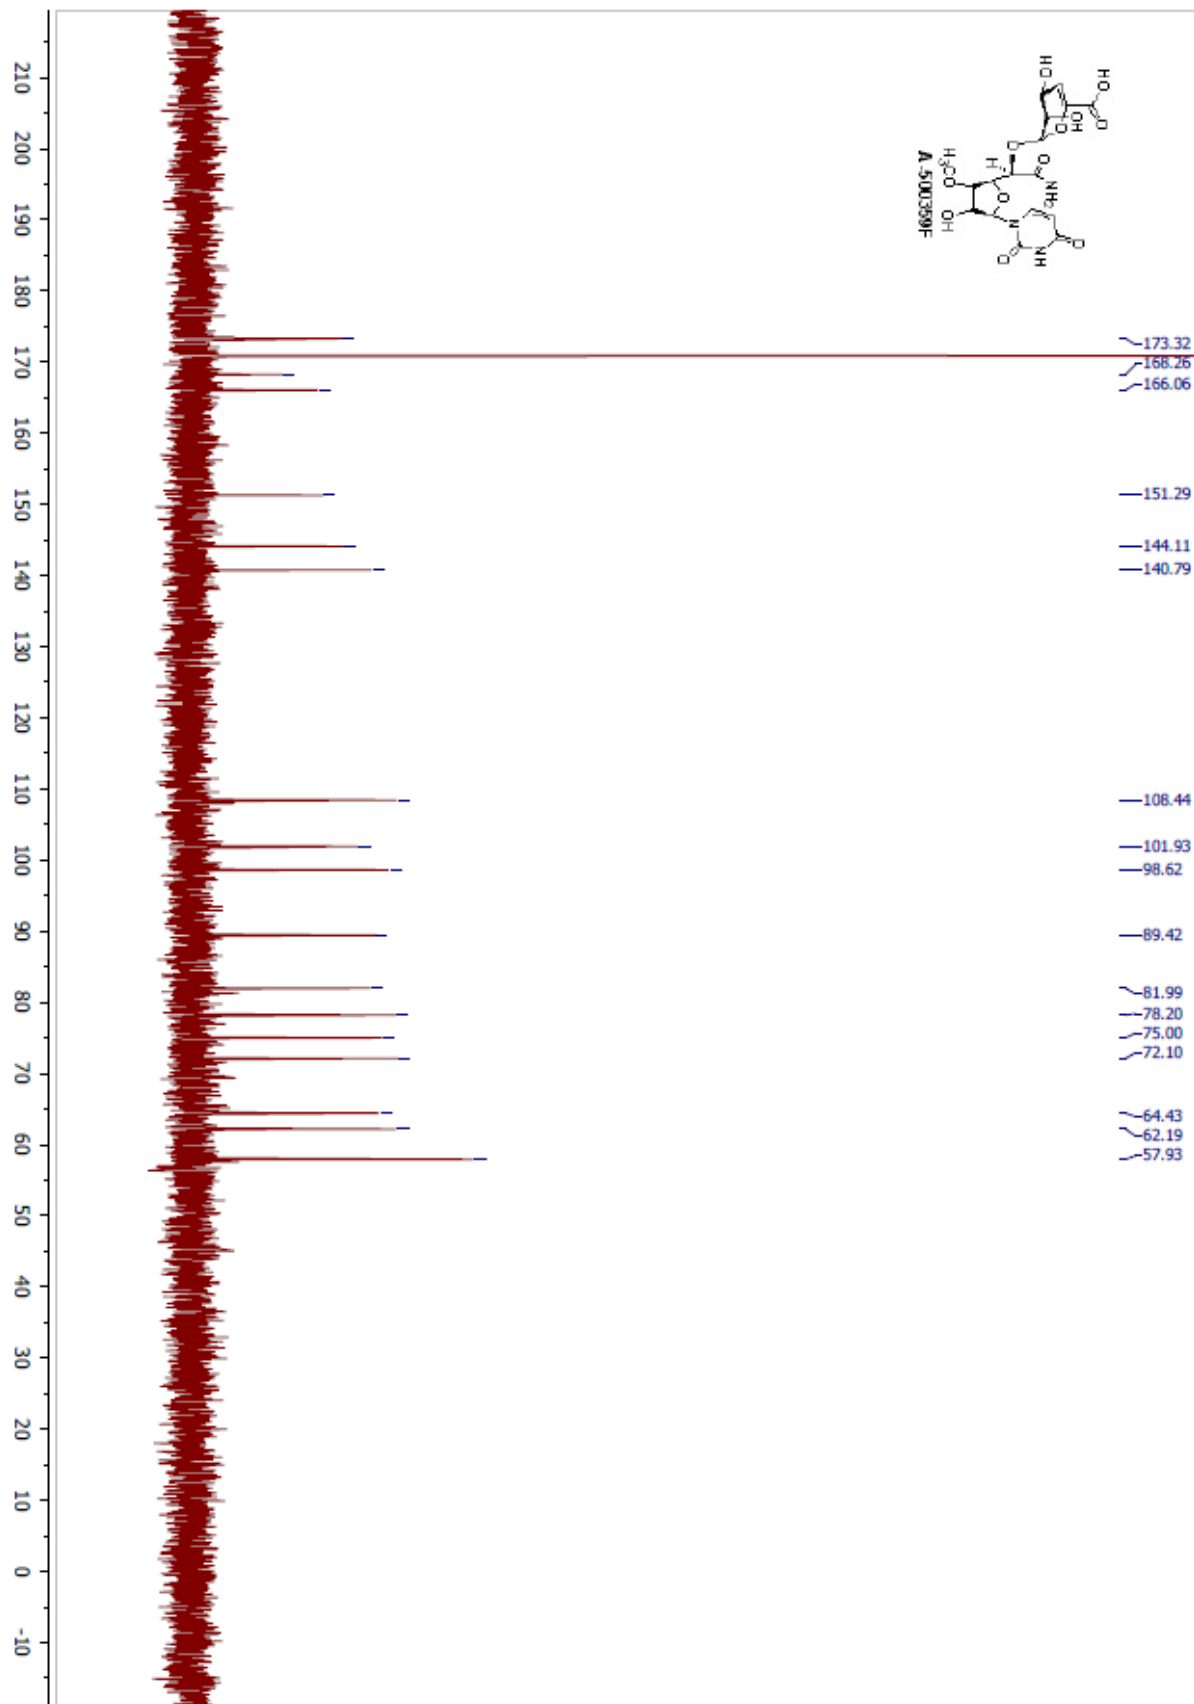

Supplement: NIHMS1626489-supplement-Supporting_Information.pdf [file NIHMS1626489-supplement-Supporting_Information.pdf]
